# Supplementary material for: Pharmacogenomic Profiling and Pathway Analyses Identify MAPK-Dependent Migration as an Acute Response to SN38 in p53 Null and p53-Mutant Colorectal Cancer Cells
Source: Oxford University Press journal article supplement (doi:10.1158/1535-7163.mct-12-0207), 2012-06-05
Supplement: 15357163mct120207-sup-t2_xls_321k.xls [file 15357163mct120207-sup-t2_xls_321k.xls]

## Sheet: Sheet1
Supplementary Table 2: List showing 2544 genes that are uniquely altered following SN38 treatment over time in HCT116 p53wild-type cells only. Genes have been normalised and filtered as stated in the materials and methods.
Genes changing in p53 wt cells only
SN38 parental wt
Time ()
Systematic	0	6	12	24	Common	Genbank	Description
225107_at	1.00267	0.866908	0.604202	0.67681	HNRPA2B1	AI963008	Heterogeneous nuclear ribonucleoprotein A2/B1
225094_at	0.954785	0.85987	0.798377	0.613942	SETD8	AL578116	SET domain containing (lysine methyltransferase) 8
225096_at	1.02442	0.964528	0.772998	0.651708	TTP1; FLJ21119; HSA272196	AJ272196	chromosome 17 open reading frame 79
225100_at	0.939805	0.738417	0.780314	0.622937	FBXO45	BF590021	F-box protein 45
225102_at	1.0752	1.07354	0.945627	1.50053	MGLL	BG168471	Monoglyceride lipase
225045_at	0.872615	0.545483	0.566136	0.826676	APE; GIV; GRDN; HkRP1; KIAA1212; DKFZp686D0630	AB033038	coiled-coil domain containing 88A
225083_at	0.998303	0.833797	0.777473	0.560581	C6orf51	AL536986	Chromosome 6 open reading frame 51
225089_at	1.04733	0.792444	0.653168	0.719912	USP40	AA127740	Ubiquitin specific peptidase 40
225085_at	0.993657	0.84938	0.652465	0.706467	USP40	AA522888	Ubiquitin specific peptidase 40
225217_s_at	0.920583	0.744584	0.606509	0.726726	BRPF3	AB033112	bromodomain and PHD finger containing, 3
225205_at	0.975441	0.860981	0.767064	0.653444	KIF3B	AI819734	Kinesin family member 3B
225206_s_at	0.977052	0.816896	0.661272	0.623372	MTRF1L	AI479199	Mitochondrial translational release factor 1-like
225234_at	0.896351	0.6587	0.589266	0.756638	CBL	AV710415	Cas-Br-M (murine) ecotropic retroviral transforming sequence
225239_at	1.06833	1.12421	0.575353	0.970651		AI355441	CDNA FLJ26120 fis, clone SYN00419
225224_at	0.991801	1.47409	1.20672	1.77475	C20orf112	AL034550
225220_at	0.960272	0.884186	0.658873	0.581356	SNHG8	BF340290	Small nucleolar RNA host gene (non-protein coding) 8
225156_at	0.999127	0.851323	0.834724	0.665634	ELF1	AK001171	elongation factor 1 homolog (S. cerevisiae)
225145_at	0.957574	0.818839	0.665175	0.588245	CIA; bA465L10.6	AB046857	nuclear receptor coactivator 5
225143_at	0.936489	0.910738	0.673805	0.627066	SFXN4	AW182455	Sideroflexin 4
224903_at	1.02567	1.03349	0.754231	0.655621	CIRH1A	AL519818	Cirrhosis, autosomal recessive 1A (cirhin)
224847_at	0.938384	0.71237	0.689632	0.592166	CDK6	AW051349	Cyclin-dependent kinase 6
224836_at	1.13388	1.3072	1.15287	1.50614	C20orf110	AL109824
224842_at	0.956598	0.866729	0.630336	0.631418	SMG1; ATX; LIP; 61E3.4; KIAA0421	AK025794	PI-3-kinase-related kinase SMG-1
225004_at	0.984471	0.662455	0.551282	0.65664	TMEM101	AL525613	Transmembrane protein 101
225038_s_at	1.0092	0.962243	0.811348	0.631479	SURF6	AI745183	Surfeit 6
225026_at	1.14913	0.997544	1.35841	1.47497	CHD6	BF572029	Chromodomain helicase DNA binding protein 6
224958_at	0.994538	0.977451	0.767078	0.635543	NUFIP2	AV728521	Nuclear fragile X mental retardation protein interacting protein 2
224956_at	1.00068	0.84218	0.68077	0.604524	NUFIP2	AI743689	Nuclear fragile X mental retardation protein interacting protein 2
224974_at	0.922182	0.729789	0.644829	0.885426	SDS3; SAP45; FLJ00052; MGC104711	AK024460	suppressor of defective silencing 3 homolog (S. cerevisiae)
224980_at	1.01632	0.737261	0.730606	0.646574	LEMD2	BF431373	LEM domain containing 2
225550_at	0.922044	0.76707	0.59064	0.80245	C1orf71	AV700816	Chromosome 1 open reading frame 71
225552_x_at	0.988295	0.895948	0.761693	0.62792	CCNL2	AI991669	Cyclin L2
225474_at	0.961884	0.55562	0.738402	1.03676	MAGI1	AI141556	Membrane associated guanylate kinase, WW and PDZ domain containing 1
225472_at	1.00696	0.847261	0.646593	0.667163	BAT4	AF129756
225454_at	0.975781	0.958501	0.680166	0.634136	CCDC124	AW248770	Coiled-coil domain containing 124
225458_at	1.00753	0.998262	0.651782	0.62057	EXOC3	BF528646	Exocyst complex component 3
225630_at	0.94058	0.880097	0.627207	0.735495	KIAA1706	AB051493	KIAA1706 protein
225657_at	1.04446	1.10057	0.789805	0.609797	LOC152217	BE563042	Hypothetical protein BC007882
225642_at	0.980994	0.84101	0.5881	0.527408	KTI12	AL581536	KTI12 homolog, chromatin associated (S. cerevisiae)
225646_at	1.03987	0.904999	0.614487	0.587568	CTSC	AI246687	Cathepsin C
225569_at	0.897266	0.747453	0.656325	0.779058	EIF2C2	AI813489	Eukaryotic translation initiation factor 2C, 2
225600_at	1.06483	1.0216	1.42745	1.52449	DKFZP779L1068	AW303300	PRO0845
225593_at	1.01766	0.966389	0.828929	0.656507	LSM10	AL542359	LSM10, U7 small nuclear RNA associated
225310_at	0.965351	0.887379	0.726232	0.588315	RBMX	AI928344	RNA binding motif protein, X-linked
225299_at	1.05509	1.07455	1.07739	1.48733	KIAA1119	AB032945	myosin VB
225300_at	0.937442	0.724052	0.647649	0.57791	C15orf23	BF792864	Chromosome 15 open reading frame 23
225307_at	0.956296	0.809723	0.692884	0.603457	ZNF511	AL583632	Zinc finger protein 511
225329_at	0.971399	0.705176	0.668002	0.576942	LOC348262	BF338291	602035518F1 NCI_CGAP_Brn64 Homo sapiens cDNA clone IMAGE:4183252 5', mRNA sequence.
225348_at	1.05453	0.653918	0.733344	0.573483	FUSIP1	AI954700	FUS interacting protein (serine/arginine-rich) 1
225262_at	1.09311	1.21423	1.48871	1.58013	FOSL2	AI670862	FOS-like antigen 2
225257_at	0.927117	0.670763	0.73641	0.58433	CCDC97	AA534536	Coiled-coil domain containing 97
225273_at	0.920366	0.693064	0.573743	0.722639	BM042; KIAA1280	AB033106	WWC family member 3
225422_at	1.04617	0.87059	0.734927	0.599313	CDC26	AI363359	Cell division cycle 26 homolog (S. cerevisiae)
225438_at	1.1409	1.04013	1.63861	1.40338	NUDCD1	BF445343	NudC domain containing 1
225357_s_at	0.990761	0.768723	0.612261	0.535944	INOC1	AI659419	INO80 complex homolog 1 (S. cerevisiae)
225399_at	0.891755	0.879136	0.74156	0.637575	sen15	AF288394	chromosome 1 open reading frame 19
223837_at	0.937415	0.623204	0.578265	0.7452	CED6; GULP; CED-6; FLJ31156	BC001103	GULP, engulfment adaptor PTB domain containing 1
223846_at	1.01616	0.639032	1.06037	0.948799	AZ2; NAP1; tilp; TILP(S)	BC001139	5-azacytidine induced 2
223802_s_at	0.92058	0.630909	0.621	0.74014	MY038; P2P-R; RBQ-1; DKFZp686P0638; DKFZp761B2423	AF063596	retinoblastoma binding protein 6
223797_at	1.07402	0.949069	0.649652	0.906995	PRO2852	AF130079	hypothetical protein PRO2852
223814_at	1.00512	0.718436	0.656059	0.685589	CCA1; MtCCA; CGI-47	BC005184	tRNA nucleotidyl transferase, CCA-adding, 1
223892_s_at	0.962923	0.82613	0.685813	0.571398	S1R; ZPRO; CGI-119	AF182414	transmembrane BAX inhibitor motif containing 4
223915_at	0.957526	0.867421	0.65652	0.744829	MAA2; ANOP2; MCOPS2; FLJ20285; FLJ38041; KIAA1575; MGC71031; MGC131961	AF317392	BCL6 co-repressor
223849_s_at	1.01331	0.88368	0.640675	0.837907	gb110; FLJ32791; KIAA1631; DKFZp667O1423	BC002548	Mov10, Moloney leukemia virus 10, homolog (mouse)
223888_s_at	0.944994	0.924787	0.768626	0.587796	LRS; LEUS; LARS1; LEURS; PIG44; RNTLS; HSPC192; hr025Cl; FLJ10595; FLJ21788; KIAA1352	AF151026	leucyl-tRNA synthetase
223723_at	1.23685	1.50434	1.65489	1.51033	MTF1; CD228; MAP97; MGC4856; FLJ38863	BC001875	antigen p97 (melanoma associated) identified by monoclonal antibodies 133.2 and 96.5
223741_s_at	1.06843	1.01793	0.691285	0.57411	MGC4837; C17orf29; MGC126172	BC004233	tweety homolog 2 (Drosophila)
223712_at	0.990363	0.870635	0.748147	0.646489	PHS2; DCOH2; DCOHM	AL136721	pterin-4 alpha-carbinolamine dehydratase/dimerization cofactor of hepatocyte nuclear factor 1 alpha (TCF1) 2
223707_at	0.938467	1.1509	0.75189	0.567274	MGC10850	BC004284	hypothetical protein MGC10850
223780_s_at	0.992323	0.866912	0.902749	0.631537	MED13; ARC250; DRIP250; HSPC221; TRAP240; KIAA0593	AF151055	thyroid hormone receptor associated protein 1
223773_s_at	0.949831	0.816306	0.621772	0.542097	RP4-669K10.5	AF277181	chromosome 1 open reading frame 79
223758_s_at	0.889723	0.708366	0.666844	0.580404	BTF2; TFIIH; BTF2P44; MGC102806; T-BTF2P44	BC005345	general transcription factor IIH, polypeptide 2, 44kDa
223742_at	1.03177	0.857821	0.712212	0.594757	L4mt; CGI-28; MGC2681; MGC16367	BC000756	mitochondrial ribosomal protein L4
224163_s_at	0.971102	0.677652	0.662238	0.624874	EAF2; SWC4; DNMAP1; DNMTAP1; FLJ11543; KIAA1425; DKFZp686L09142	AL136657	DNA methyltransferase 1 associated protein 1
224177_s_at	1.01208	0.919441	0.758278	0.610896	MGC874	AF151079	Homo sapiens HSPC245 mRNA, complete cds.
224159_x_at	0.886762	1.05281	2.78923	1.43856	RNF87	AF220023	tripartite motif-containing 4
224281_s_at	1.01518	0.941787	0.759221	0.636431	DSC92; NEUGRIN	AF225423	neugrin, neurite outgrowth associated
223977_s_at	0.854992	0.817357	0.543943	0.747808	C18orf2	AF295726	chromosome 18 open reading frame 2
223978_s_at	1.0003	0.964775	0.795402	0.659415	CLS1; GCD10; C20orf155; dJ967N21.6	AF241784	cardiolipin synthase 1
223946_at	1.07867	1.49219	1.14415	0.978893	SUR2; MED23; CRSP130; CRSP133; DRIP130; DKFZp434H0117	AL136776	cofactor required for Sp1 transcriptional activation, subunit 3, 130kDa
224060_s_at	0.857625	0.817072	0.685618	0.632795	AD-018; CGI-30; NPD015; HSPC143; MGC61450	AF157319	DPH5 homolog (S. cerevisiae)
224022_x_at	0.931484	0.995328	0.991691	1.11958	WNT16	AF169963	wingless-type MMTV integration site family, member 16
224015_s_at	1.03455	0.899066	0.629465	0.861087	RPMS25; MRP-S25; FLJ00023; DKFZp313H0817	BC003590	mitochondrial ribosomal protein S25
223479_s_at	0.965193	0.863407	0.63697	0.555454	C2orf9; FLJ39671; MGC11104	BC004498	coiled-coil-helix-coiled-coil-helix domain containing 5
223489_x_at	0.943805	1.06662	0.738067	0.611379	EXOSC3	AW015573	Exosome component 3
223460_at	0.871088	0.532814	0.74109	0.807592	CAMKKA; MGC34095; DKFZp761M0423	AL136576	calcium/calmodulin-dependent protein kinase kinase 1, alpha
223472_at	1.02693	1.06567	0.638648	0.605735	WHS; NSD2; TRX5; MMSET; REIIBP; FLJ23286; KIAA1090	AF071594	Wolf-Hirschhorn syndrome candidate 1
223516_s_at	0.951962	0.932626	0.758815	0.654025	OBTP; OEBT; MGC120398	AF216754	chromosome 6 open reading frame 49
223527_s_at	1.02318	1.01143	0.858045	0.650581	CDADC1	AL138875
223492_s_at	1.20653	1.36311	1.14931	1.65816	GCF2; TRIP; GCF-2; FLAP-1; HUFI-1; FLIIAP1; MGC10947; MGC119738; MGC119739	BC004958	leucine rich repeat (in FLII) interacting protein 1
223506_at	0.910261	0.826514	0.697621	0.652408	Fliz1; ZC3HDC8	AF334161	zinc finger CCCH-type containing 8
223424_s_at	0.990867	0.881468	0.639362	0.603141	ZNF38; Zipro1; NY-REN-21; DKFZp434L134; DKFZp686H10254	AL136865	zinc finger and SCAN domain containing 21
223414_s_at	0.955915	0.891851	0.692792	0.632987	ZLYAR; FLJ20425	AL136750	Ly1 antibody reactive homolog (mouse)
223413_s_at	1.02715	0.915369	0.73453	0.601382	LYAR	AW958593	Hypothetical protein FLJ20425
223452_s_at	1.02096	0.992986	0.784674	0.641833	DKFZP564J0863; ATL3	AL117600	DKFZP564J0863 protein
223643_at	0.81726	0.990671	1.03934	0.607193	CRYGS	AI762135	Crystallin, gamma S
223624_at	0.953266	0.607375	0.68487	0.730531	ZFAND4; FLJ40185	AF311324	AN1, ubiquitin-like, homolog (Xenopus laevis)
223611_s_at	1.11488	1.13042	1.07266	1.76044	LNX1	AI738919	Ligand of numb-protein X 1
223458_at	0.999762	0.688019	0.649004	0.769174	PSK-1; FLJ90517	BC000567	seizure related 6 homolog (mouse)-like 2
224697_at	0.972659	1.54093	0.951388	0.888898	WDR22	AI568478	WD repeat domain 22
224714_at	0.998456	0.942707	0.731029	0.664854	MKI67IP	AL542544	MKI67 (FHA domain) interacting nucleolar phosphoprotein
224652_at	0.846573	0.796706	0.554531	0.544836	CCNY	AV701987	Cyclin Y
224654_at	0.975525	0.932765	0.80412	0.643959	DDX21	BG164358	DEAD (Asp-Glu-Ala-Asp) box polypeptide 21
224634_at	0.986746	0.902818	0.677657	0.459873	GPATCH4	AI911518	G patch domain containing 4
224632_at	0.976297	0.87519	0.658457	0.482361	GPATCH4	BE794289	G patch domain containing 4
224641_at	0.877279	0.62477	0.618514	0.592324	FYTTD1	BF576005	Forty-two-three domain containing 1
224673_at	1.01806	0.780978	0.579542	0.950322	LENG8	AI613244	ty35a06.x1 NCI_CGAP_Ut2 Homo sapiens cDNA clone IMAGE:2281042 3' similar to SW:EXTN_TOBAC P13983 EXTENSIN PRECURSOR ;, mRNA sequence.
224667_x_at	0.966157	0.837711	0.458242	0.811416	FLJ33728; bA570G20.3	AK023981	chromosome 10 open reading frame 104
224658_x_at	0.982314	0.647325	0.614095	0.925153	PACS1	AL530612	Transcribed locus
224661_at	1.0206	0.832958	0.722564	0.651234	PIGY	AW028485	Phosphatidylinositol glycan anchor biosynthesis, class Y
224781_s_at	0.931092	0.858783	0.76171	0.645637	RBM17	AI923119	RNA binding motif protein 17
224828_at	0.976337	0.653298	0.946437	0.947466	CPEB4	AV704132	Cytoplasmic polyadenylation element binding protein 4
224817_at	0.974224	1.03499	1.33725	1.65444	SH3PXD2A	W93554	SH3 and PX domains 2A
224742_at	0.869878	0.718999	0.560863	0.994183	ABHD12	BF570412	Abhydrolase domain containing 12
224740_at	0.934103	0.83252	0.692118	0.642158	DKFZP686E2158	BE613001	Hypothetical protein LOC643155
224736_at	0.951811	0.742868	0.684987	0.654771	CCAR1	BE617899	Cell division cycle and apoptosis regulator 1
224771_at	1.02144	0.785101	0.62634	0.530573	NAV1	AI937060	Neuron navigator 1
224776_at	0.959698	0.917106	0.707866	0.634057	AGPAT6	BF513102	1-acylglycerol-3-phosphate O-acyltransferase 6 (lysophosphatidic acid acyltransferase, zeta)
224766_at	0.979599	0.7755	0.577087	0.487252	RPL37	AW008221	Ribosomal protein L37
224446_at	0.983699	0.798324	0.638697	0.604575	MGC14817; MGC104302	BC006002	chromosome 12 open reading frame 31
224478_s_at	0.992635	0.903717	0.849815	0.657995	MGC11257	BC006224	hypothetical protein MGC11257
224461_s_at	1.01441	0.87596	0.694553	0.627533	AMID; PRG3; RP11-367H5.2	BC006121	apoptosis-inducing factor, mitochondrion-associated, 2
224467_s_at	1.0102	0.910628	0.727075	0.662454	MGC13096	BC006146	programmed cell death 2-like
224319_s_at	0.938273	0.919801	0.692276	0.576506	FLJ20232; HSU79252; dJ1104E15.3	AL136768	Smith-Magenis syndrome chromosome region, candidate 7-like
224370_s_at	1.13482	0.681835	1.13796	1.57248	FLJ34520; UG0636c06	AF251056	calcyphosine 2
224375_at	1.04285	1.45403	1.68966	1.73707		AF271776	Homo sapiens DC48 mRNA, complete cds.
224352_s_at	0.919428	0.814543	0.782052	0.635587	NEM7	AF134802	cofilin 2 (muscle)
224579_at	0.990437	0.880253	0.741988	0.643654	SLC38A1	BF247552	Solute carrier family 38, member 1
224618_at	0.933984	0.626673	0.780538	0.716602	ROD1	BF059136	ROD1 regulator of differentiation 1 (S. pombe)
224610_at	0.917393	0.869684	0.703989	0.594451	SNHG1	AL530869	Small nucleolar RNA host gene (non-protein coding) 1
224509_s_at	0.950871	0.875315	0.642398	0.704037	NIMP; MGC12934	BC006399	reticulon 4 interacting protein 1
224565_at	0.84464	0.830748	0.567989	0.952749	TncRNA	BE675516	Trophoblast-derived noncoding RNA
224567_x_at	0.858552	0.477515	0.570796	0.690017	MALAT1	BG534952	Metastasis associated lung adenocarcinoma transcript 1 (non-coding RNA)
224535_s_at	1.00423	1.00685	0.78461	0.646638	bMRP63; MGC3243	AB049957	mitochondrial ribosomal protein 63
224563_at	1.0803	0.850828	0.867089	0.62075	LOC644739	BG338758	Similar to Wiskott-Aldrich syndrome protein family member 4 (WASP-family protein member 4)
226858_at	1.01754	0.932672	0.631568	0.64424	CSNK1E	T51255	yb03g03.s1 Stratagene placenta (#937225) Homo sapiens cDNA clone IMAGE:70132 3', mRNA sequence.
226859_at	1.00716	0.964752	0.68758	0.62865	GNG10	AI765321	Guanine nucleotide binding protein (G protein), gamma 10
226838_at	1.07728	0.868363	0.873974	0.607251	TTC32	BE465877	Tetratricopeptide repeat domain 32
226851_at	0.957805	0.759578	0.643162	0.611903	LYPLAL1	AW612657	Lysophospholipase-like 1
226889_at	0.910357	0.711618	0.638421	0.648478	WDR35	AU151732	WD repeat domain 35
226873_at	1.26179	0.887962	1.54171	1.46298	KIAA1164	AI631210	CDNA clone IMAGE:4794011
226880_at	1.01282	0.754353	0.76314	0.628865	NUCKS1	AL035851	Nuclear casein kinase and cyclin-dependent kinase substrate 1
226783_at	0.953874	0.892108	0.640529	0.834867	HNRPAB	AI762154	Heterogeneous nuclear ribonucleoprotein A/B
226781_at	0.9707	0.92552	0.789977	0.594091	LUC7L2	BF540829	LUC7-like 2 (S. cerevisiae)
226786_at	1.08267	1.11562	1.51356	1.18715	RFX1	BF507952	Regulatory factor X, 1 (influences HLA class II expression)
226787_at	0.967163	0.806714	0.569273	0.717788	ZNF18	BF966015	Zinc finger protein 18
227016_at	1.02059	0.918736	0.584895	0.769384	ERICH1	AA767385	Glutamate-rich 1
226998_at	0.965711	0.784686	0.727639	0.641034	NARG1	AL556909	NMDA receptor regulated 1
226923_at	0.884615	0.835399	0.648175	0.652229	SCFD2	AW205790	Sec1 family domain containing 2
226898_s_at	0.942484	0.819012	0.780042	0.63529	SFPQ	AI439021	Splicing factor proline/glutamine-rich (polypyrimidine tract binding protein associated)
226909_at	0.850781	0.561193	0.656578	0.773855	KIAA1729	AW270138	KIAA1729 protein
226607_at	0.916566	0.92341	0.628232	0.938404	C20orf194	AI498144	Chromosome 20 open reading frame 194
226620_x_at	0.922225	0.973623	0.706433	0.627044	DAZAP1	AI951998	DAZ associated protein 1
226602_s_at	0.938407	0.848285	0.636751	0.756631	BCR	T30183	Breakpoint cluster region
226555_at	0.976539	0.741973	0.648797	0.753636		BG026789	602294256F1 NIH_MGC_86 Homo sapiens cDNA clone IMAGE:4388988 5', mRNA sequence.
226560_at	0.968939	0.95449	1.23282	1.49652	SGPP2	AA576959	Transcribed locus
226562_at	1.02955	0.760774	0.659462	0.709188	ZSCAN29	BE622486	Zinc finger and SCAN domain containing 29
226585_at	0.91613	0.855353	0.586948	0.590914	NEIL2	BE466620	Nei like 2 (E. coli)
226566_at	0.962567	0.84976	0.598234	0.795986	TRIM11	AI885021	Tripartite motif-containing 11
226574_at	1.01842	0.909698	0.689404	0.607787	PSPC1	AI872384	Paraspeckle component 1
226744_at	1.00378	0.943121	0.784416	0.644209	ZSCAN22	BG284386	Zinc finger and SCAN domain containing 22
226745_at	0.837139	0.737853	0.614037	0.572463	CYP4V2	AU146978	Cytochrome P450, family 4, subfamily V, polypeptide 2
226725_at	0.883209	0.962977	1.1908	1.72138	SLFN5	AI435399	Schlafen family member 5
226775_at	1.00374	1.04024	0.877355	0.566448	ENY2	N30904	Enhancer of yellow 2 homolog (Drosophila)
226773_at	0.961199	1.09698	1.09166	1.45214	PTGES3	AW290940	MRNA (clone ICRFp507I1077)
226749_at	0.969873	0.889483	0.702267	0.661727	MRPS9	AL582429	Mitochondrial ribosomal protein S9
226761_at	1.01357	1.01703	0.722091	0.609964	IKZF4	BF940979	IKAROS family zinc finger 4 (Eos)
226758_at	0.956743	0.793654	0.797214	0.594779	LUC7L2	AA043552	LUC7-like 2 (S. cerevisiae)
226657_at	0.958942	1.16696	1.4062	1.63037	TMEM11	H27948	Transmembrane protein 11
226703_at	1.08133	0.975666	0.646341	0.9573	KIAA1787	AL136870	KIAA1787 protein
227373_at	1.02737	0.905422	0.761199	0.666095	hCG_1646491	AW299653	Brother of ataxin-1
227361_at	1.27383	1.30721	1.16975	2.3291	HS3ST3B1	AA780067	Heparan sulfate (glucosamine) 3-O-sulfotransferase 3B1
227364_at	0.979603	0.979956	0.738632	0.632507	CAPZA1	AW084125	Transcribed locus
227356_at	1.09422	0.903307	0.724233	0.569947	KIAA0779	BG499974	CDNA: FLJ22198 fis, clone HRC01218
227408_s_at	1.01881	1.19393	1.34475	1.5641	SNX25	AW008976	Sorting nexin 25
227404_s_at	0.832889	0.522418	0.654482	0.686414	EGR1	AI459194	Early growth response 1
227406_at	1.00829	0.901894	0.68867	0.65815	GABPB2	AI286203	GA binding protein transcription factor, beta subunit 2
227384_s_at	1.10883	0.959149	0.656913	0.943193	FAM91A2	AW340595	Family with sequence similarity 91, member A2
227298_at	1.35112	1.51289	1.15896	1.1235	FLJ37798	AI806330	Hypothetical gene supported by AK095117
227294_at	0.951502	0.755415	0.580332	0.520828	ZNF689	AI474448	Zinc finger protein 689
227332_at	1.11843	1.09959	0.905105	0.611465		BF511170	Full-length cDNA clone CS0DD005YE10 of Neuroblastoma Cot 50-normalized of Homo sapiens (human)
227330_x_at	1.23636	1.49496	1.39349	1.36605	LOC389833	AA811509	Similar to hypothetical protein MGC27019
227322_s_at	1.01507	0.911764	0.776124	0.652825	BCCIP	BE464077	BRCA2 and CDKN1A interacting protein
227503_at	0.912719	0.83122	0.992497	0.875993	KIF5C	N26620	CDNA FLJ43100 fis, clone CTONG2003100
227514_at	0.880023	0.700344	0.766703	0.611693	LOC162073	AI766311	Hypothetical protein LOC162073
227529_s_at	0.758424	0.584253	0.480405	0.623097	AKAP12	BF511276	A kinase (PRKA) anchor protein (gravin) 12
227530_at	0.767685	0.582577	0.460367	0.560224	AKAP12	BF511276	A kinase (PRKA) anchor protein (gravin) 12
227517_s_at	0.947572	0.834515	0.623944	0.653952	GAS5	AI056992	Growth arrest-specific 5
227447_at	0.910736	0.846992	0.709181	0.62459	SKIV2L2	AA525163	Superkiller viralicidic activity 2-like 2 (S. cerevisiae)
227442_at	0.971358	0.911289	0.740772	0.648193	COX18	BG283902	COX18 cytochrome c oxidase assembly homolog (S. cerevisiae)
227445_at	0.970216	0.787656	0.782816	0.653764	ZNF689	W80378	Zinc finger protein 689
227425_at	0.869812	1.10723	0.874126	1.65461	REPS2	AI984607	RALBP1 associated Eps domain containing 2
227466_at	0.96535	0.825014	0.662581	0.663085	LOC285550	BF108695	Hypothetical protein LOC285550
227453_at	0.889983	0.890925	0.65609	0.97563	UNC13A	R60139	Unc-13 homolog A (C. elegans)
227458_at	1.1542	1.0702	1.27753	1.60892	PDCD1LG1	AI608902	Transcribed locus
227092_at	0.908633	0.907196	0.715357	0.636837	LOC728928	AI341383	Hypothetical protein LOC728928
227093_at	0.950655	0.821245	0.565582	0.615099	USP36	AU152298	Ubiquitin specific peptidase 36
227090_at	1.12604	1.54978	1.74348	0.977585	PHF21A	AA194264	PHD finger protein 21A
227110_at	0.948806	0.915502	0.771981	0.54384	HNRPC	AA126793	Heterogeneous nuclear ribonucleoprotein C (C1/C2)
227037_at	0.96873	0.804599	0.587494	0.714148	LOC201164	AA029500	Similar to CG12314 gene product
227042_at	1.0214	0.84659	0.755459	0.658449	LOC150223	BE218514	LOC150223 protein
227070_at	0.68677	0.51375	0.536346	0.453543	GLT8D2	W63754	Glycosyltransferase 8 domain containing 2
227074_at	0.984993	0.881667	0.641034	0.957414	Gcom1	AA524669	MRNA; cDNA DKFZp667D2123 (from clone DKFZp667D2123)
227055_at	0.81673	0.648584	0.664147	0.521604	METTL7B	AI827972	Methyltransferase like 7B
227223_at	0.990142	0.777739	0.64027	0.709477	RBM39	BE466173	RNA binding motif protein 39
227229_at	0.971859	0.928675	0.650849	0.722836	FLJ10979	BE467416	CDNA clone IMAGE:5303499
227212_s_at	0.979439	0.858748	0.654892	0.553207	PHF19	BE544837	PHD finger protein 19
227160_s_at	0.932581	0.87602	0.752109	0.639611	C20orf7	AW102828	Chromosome 20 open reading frame 7
227164_at	0.882815	0.734449	0.757965	0.602649	SFRS1	AL521786	AL521786 Homo sapiens NEUROBLASTOMA COT 10-NORMALIZED Homo sapiens cDNA clone CS0DB003YK13 3-PRIME, mRNA sequence.
227141_at	0.983247	0.85647	0.758207	0.586305	TYW3	AW205739	TRNA-yW synthesizing protein 3 homolog (S. cerevisiae)
227188_at	0.992801	0.880475	0.748879	0.568053	C21orf63	AI744591	Chromosome 21 open reading frame 63
227170_at	0.941532	0.802535	0.615755	0.759556		BF338409	MRNA; cDNA DKFZp686B2320 (from clone DKFZp686B2320)
225933_at	1.05898	0.985455	0.622677	0.574007	CCDC137	BF115231	Coiled-coil domain containing 137
225935_at	0.884589	0.633292	0.742138	0.711115	TGFBI	AI350995	CDNA clone IMAGE:4816860
225932_s_at	1.02655	0.888293	0.6365	0.632263	HNRPA2B1	AI375753	Heterogeneous nuclear ribonucleoprotein A2/B1
225967_s_at	0.981473	0.907358	0.786422	0.591413	LOC284184	BF683512	Hypothetical LOC284184
225962_at	0.797385	0.526396	0.432905	0.454078	ZNRF1	AI199541	Zinc and ring finger 1
225888_at	0.99548	0.85115	0.658917	0.677743	C12orf30	N62802	Chromosome 12 open reading frame 30
225877_at	0.861564	0.594299	0.608266	0.603632	TYSND1	BG389635	Trypsin domain containing 1
225896_at	1.29082	1.46027	1.2738	1.49461	M-RIP	AI656836	CDNA FLJ34018 fis, clone FCBBF2002801
226039_at	0.913756	0.632138	1.06285	1.16943	MGAT4A	AW006441	Mannosyl (alpha-1,3-)-glycoprotein beta-1,4-N-acetylglucosaminyltransferase, isozyme A
226037_s_at	0.946819	0.959079	0.908943	0.646131	TAF9L	AL049589	Human DNA sequence from clone RP4-570L12 on chromosome Xq13.1-21.1, complete sequence.
226062_x_at	1.03545	0.744287	0.568106	0.83223	FLJ11280; FLJ43504; RP11-316M1.5	AB037811	family with sequence similarity 63, member A
225996_at	1.06811	0.766475	0.504495	0.840268	LONRF2	AV709727	LON peptidase N-terminal domain and ring finger 2
226002_at	0.919408	0.98509	1.49425	1.61187	GAB1	AK022142	GRB2-associated binding protein 1
226020_s_at	1.02605	0.623602	0.643842	0.913153	OMA1	AI927931	OMA1 homolog, zinc metallopeptidase (S. cerevisiae)
226011_at	0.934505	0.739105	0.67852	0.58793	CCDC12	BG107767	Coiled-coil domain containing 12
225730_s_at	1.02191	0.742876	0.719107	0.563267	THUMPD3	AI921788	THUMP domain containing 3
225735_at	0.973049	0.567382	0.810984	0.797922	KIAA1223	AL110131	ankyrin repeat domain 50
225713_at	0.974847	1.50934	1.16887	1.07932	STK11IP	AV727346	Serine/threonine kinase 11 interacting protein
225740_x_at	0.89929	0.802261	0.67006	0.632188	MDM4	AA961420	Full-length cDNA clone CS0CAP006YG04 of Thymus of Homo sapiens (human)
225741_at	0.984674	0.869755	0.765991	0.655839	THUMPD3	AU154401	THUMP domain containing 3
225751_at	0.935545	0.879805	0.881447	0.6501	RBM17	BF063156	RNA binding motif protein 17
225682_s_at	0.991086	0.834278	0.816748	0.598918	POLR3H	AI587069	Polymerase (RNA) III (DNA directed) polypeptide H (22.9kD)
225704_at	1.13801	0.93178	0.588116	0.975067	KIAA1545	AA527531	KIAA1545 protein
225699_at	0.985086	0.791839	0.570574	0.585062	C7orf40	AI937446	Chromosome 7 open reading frame 40
225687_at	0.926556	0.61075	0.641575	0.643028	FLJ38341; C20orf129; dJ616B8.3	BC001068	family with sequence similarity 83, member D
225833_at	0.822776	0.688335	0.450987	0.599665	DAGLB	BE795104	Diacylglycerol lipase, beta
225838_at	0.858479	0.747327	0.740763	0.616279	DKFZP566F2124	AK002010	enhancer of polycomb homolog 2 (Drosophila)
225859_at	0.97858	0.680916	0.533549	0.599623	BIRC4	N30645	Baculoviral IAP repeat-containing 4
225857_s_at	1.01991	0.935966	0.625966	0.531977	LOC388796	AA827892	Hypothetical LOC388796
225858_s_at	0.973704	0.838734	0.640592	0.610925	BIRC4	N30645	Baculoviral IAP repeat-containing 4
225862_at	0.943808	0.918099	0.691958	0.660699	SLC25A26	AA928255	Solute carrier family 25, member 26
225782_at	0.781605	0.700649	0.611698	0.581731	MSRB3	AW027333	Methionine sulfoxide reductase B3
225779_at	0.927734	0.961639	0.832492	0.637722	FATP4; ACSVL4	AK000722	solute carrier family 27 (fatty acid transporter), member 4
225787_at	0.993387	0.821995	0.653684	0.7196	UBE2F	AI799788	Ubiquitin-conjugating enzyme E2F (putative)
225767_at	1.00193	0.900661	0.666855	0.575587		AI825833	td19b05.x1 NCI_CGAP_Co16 Homo sapiens cDNA clone IMAGE:2076081 3', mRNA sequence.
225805_at	1.01865	0.755902	0.712035	0.614711	HNRPU	AW137669	Heterogeneous nuclear ribonucleoprotein U (scaffold attachment factor A)
225813_at	0.8431	0.770931	0.497708	0.526403	MNAB	AA524361	ng43c03.s1 NCI_CGAP_Co3 Homo sapiens cDNA clone IMAGE:937540 3', mRNA sequence.
225798_at	0.932033	0.816827	0.643565	1.03661	JAZF1	AL047908	JAZF zinc finger 1
226409_at	0.935913	0.919321	0.647235	0.774302	TBC1D20	BE349614	TBC1 domain family, member 20
226410_at	1.05883	1.01164	0.781154	0.574156	LOC348180	R60020	Hypothetical protein LOC348180
226419_s_at	1.12082	0.971405	0.611306	0.95643	SFRS1	AA046439	Splicing factor, arginine/serine-rich 1 (splicing factor 2, alternate splicing factor)
226525_at	1.03554	1.12809	1.50975	1.55418	CATSPER2	N51102	Transcribed locus
226439_s_at	0.844751	0.610927	0.561899	0.677498	NBEA	AI246710	Neurobeachin
226465_s_at	1.04542	0.846552	0.704599	0.663607	SON	BF676840	SON DNA binding protein
226451_at	0.983491	0.832049	0.824566	0.570106	MGC19604	AI453531	Similar to RIKEN cDNA B230118G17 gene
226165_at	1.00415	0.949592	0.744281	0.64153	C8orf59	BF674436	Chromosome 8 open reading frame 59
226145_s_at	1.0584	0.838848	0.658528	0.945397	FLJ14927; FLJ22031; KIAA1500; DKFZp686I05113; DKFZp686P08111	AL157471	Fraser syndrome 1
226186_at	1.03217	1.03066	1.30573	1.53963	TMOD2	AW207699	CDNA clone IMAGE:5301189
226106_at	0.854283	0.690784	0.685495	0.602826	RNF141	AI307808	Ring finger protein 141
226118_at	0.914016	0.857538	0.752835	0.625734	ADCY3	BE326728	Adenylate cyclase 3
226127_at	1.01599	0.948281	0.726183	0.640225	ALKBH3	BF062547	AlkB, alkylation repair homolog 3 (E. coli)
226298_at	0.89667	0.81793	0.631711	0.555628	RUNDC1	BE394201	RUN domain containing 1
226209_at	0.999242	0.909543	0.691328	0.622131	NDUFV3	AI129346	NADH dehydrogenase (ubiquinone) flavoprotein 3, 10kDa
219673_at	0.864277	0.780497	0.535987	0.708241	C6orf61	NM_017696
219667_s_at	1.01258	0.827398	0.852537	0.630175	BANK; FLJ20706; FLJ34204	NM_017935	B-cell scaffold protein with ankyrin repeats 1
219662_at	0.943633	0.888282	0.620217	0.799584	MGC5509; FLJ45759	NM_024093	chromosome 2 open reading frame 49
219709_x_at	0.995054	0.86482	0.692372	0.660284	MGC2494	NM_023933	chromosome 16 open reading frame 24
219729_at	0.94842	1.03831	0.637588	0.862458	PMX2; PRX2; MGC19843	NM_016307	paired related homeobox 2
219691_at	1.28168	1.32549	1.26245	1.78945	NFTC; OEF1; OEF2; C7orf5; FLJ20073; KIAA2004	NM_017654	sterile alpha motif domain containing 9
219694_at	1.17778	1.61634	1.29651	1.43283	FLJ11127	NM_019018	family with sequence similarity 105, member A
219575_s_at	0.965149	0.889744	0.640173	0.537861	COG8	NM_022341	peptide deformylase (mitochondrial)
219581_at	1.00585	0.802899	0.484633	0.696852	SEN2; SEN2L; MGC2776; MGC4440	NM_025265	tRNA splicing endonuclease 2 homolog (S. cerevisiae)
219626_at	0.904368	0.718888	0.6342	0.897071	FLJ12401; FLJ12649; RP11-535K18.3	NM_024597	MAP7 domain containing 3
219637_at	0.956996	0.689557	0.565001	0.827303	ARM; FLJ12584; KU-MEL-1	NM_025139	armadillo repeat containing 9
219922_s_at	0.987824	0.982571	0.631331	0.778489	LTBP2; LTBP-3; pp6425; FLJ33431; FLJ39893; FLJ42533; FLJ44138; DKFZP586M2123	NM_021070	latent transforming growth factor beta binding protein 3
219891_at	1.15177	1.63281	1.52889	1.90138	PGP; Pcp; PGPI; PGP-I; FLJ20208; MGC10812	NM_017712	pyroglutamyl-peptidase I
219904_at	1.03804	0.718358	0.750869	0.627014	ZNF495; MGC4161	NM_024303	zinc finger and SCAN domain containing 5
219906_at	1.00388	0.852856	0.572985	0.906642	FLJ10213	NM_018029	hypothetical protein FLJ10213
219798_s_at	1.00057	0.709806	0.573286	0.498859	FLJ20257	NM_019606	bin3, bicoid-interacting 3, homolog (Drosophila)
219392_x_at	0.961549	0.758359	0.606823	0.761794	FLJ11029	NM_018304	proline rich 11
219382_at	1.01389	1.21383	1.58661	1.26264	RBT1	NM_013368	SERTA domain containing 3
219420_s_at	0.9955	0.809741	0.671395	0.56371	FLJ12439	NM_023077	chromosome 1 open reading frame 163
219410_at	1.22207	1.29266	1.00966	1.46498	DERP7; FLJ10134	NM_018004	transmembrane protein 45A
219437_s_at	0.991458	0.865312	0.691757	0.601621	T13; LZ16; ANCO-1	NM_013275	ankyrin repeat domain 11
219328_at	1.01884	0.826942	0.654204	0.571157	FLJ13633; FLJ14578; FLJ23349; helicain A; helicain B; helicain C	NM_022779	DEAD (Asp-Glu-Ala-Asp) box polypeptide 31
219326_s_at	1.01868	1.36601	1.35915	1.67135	B3GNT; B3GNT1; B3GN-T1; B3GN-T2; B3GNT-2; BETA3GNT	NM_006577	UDP-GlcNAc:betaGal beta-1,3-N-acetylglucosaminyltransferase 2
219313_at	1.00427	0.733606	0.823662	1.41724	FLJ35862; FLJ40464; DKFZp434C0328; DKFZp686K06117	NM_017577	GRAM domain containing 1C
219307_at	0.935209	0.905454	0.772108	0.622483	DLP1; hDLP1; C6orf210; bA59I9.3	NM_020381	prenyl (decaprenyl) diphosphate synthase, subunit 2
219317_at	0.949387	0.730425	0.650666	0.682388	RAD30B; RAD3OB	NM_007195	polymerase (DNA directed) iota
219362_at	1.01948	0.895115	0.696938	0.646626	FLJ21613; FLJ22643; bA379P1.1; RP11-379P1.1	NM_024635	MAK10 homolog, amino-acid N-acetyltransferase subunit, (S. cerevisiae)
219526_at	0.76975	0.741535	0.755603	0.64739	FLJ21802	NM_024644	chromosome 14 open reading frame 169
219522_at	1.02818	0.716758	0.683559	0.613176	FLJ22416; FLJ25593	NM_014344	four jointed box 1 (Drosophila)
219529_at	1.04277	1.03385	0.989665	1.48426	CLIC3	NM_004669	chloride intracellular channel 3
219503_s_at	0.937156	0.875525	1.17986	1.85768	FLJ11036	NM_018306	transmembrane protein 40
219510_at	0.975239	0.616821	0.830591	0.950299	POLQ	NM_006596	polymerase (DNA directed), theta
219560_at	0.977461	0.870445	0.743359	0.567123	FLJ21125	NM_024627	chromosome 22 open reading frame 29
219563_at	0.988996	1.22665	1.06492	1.63078	C14orf139	NM_024633	chromosome 14 open reading frame 139
219543_at	1.04836	1.01498	0.787565	0.615539	MAWBP; MAWDBP; FLJ14767; FLJ35507	NM_022129	phenazine biosynthesis-like protein domain containing
219544_at	1.00486	0.711993	0.657669	0.608102	BORA; FLJ22624; RP11-342J4.2	NM_024808	chromosome 13 open reading frame 34
219448_at	0.934122	0.805985	0.6127	0.534824	FLJ20533	BC002748	transmembrane protein 70
219495_s_at	0.920181	0.81849	0.72304	0.61801	HHZ168	NM_013256	zinc finger protein 180
219497_s_at	0.760212	0.655646	1.26472	1.26517	EVI9; CTIP1; BCL11A-L; BCL11A-S; FLJ10173; FLJ34997; KIAA1809; BCL11A-XL	NM_022893	B-cell CLL/lymphoma 11A (zinc finger protein)
220643_s_at	1.06255	0.952107	0.776805	0.664858	FAIM1	NM_018147	Fas apoptotic inhibitory molecule
220734_s_at	0.919215	0.851569	0.694843	0.62637	MGC10334	NM_030575	hypothetical protein MGC10334
220725_x_at	1.02916	0.960563	1.73557	1.42052	FLJ23558	NM_025095
220728_at	0.882742	0.564765	0.515714	0.437984		NM_025120
220688_s_at	0.998561	0.924152	0.713257	0.524937	MRT4; C1orf33; dJ657E11.4	NM_016183	mRNA turnover 4 homolog (S. cerevisiae)
220702_at	0.890813	0.861126	0.468983	0.74576		NM_018616
220710_at	0.912859	0.887946	0.473762	0.754934	FLJ11722	NM_024970
220467_at	0.989394	0.69816	0.397244	0.542931	FLJ21272	NM_025032
220473_s_at	1.08061	0.887045	1.49247	1.0944	ZCCHC4	NM_014150
220474_at	0.98888	1.05508	1.07502	0.468716	ODC; ODC1; MGC126570	NM_030631	solute carrier family 25 (mitochondrial oxodicarboxylate carrier), member 21
220408_x_at	0.976861	0.637174	0.719146	0.707049	C13; FP757; P38IP; C13orf19; bA421P11.4	NM_017569	family with sequence similarity 48, member A
220526_s_at	0.982386	0.903936	0.750263	0.558737	L20mt; MGC4779; MGC74465	NM_017971	mitochondrial ribosomal protein L20
220521_s_at	0.780277	0.773973	0.567167	0.565229	WDR30; APG16L; ATG16L; FLJ00045; FLJ10035; FLJ10828; FLJ22677	NM_017974	ATG16 autophagy related 16-like 1 (S. cerevisiae)
220954_s_at	0.971815	0.955624	0.599873	0.902047	FDFACT1; FDFACT2	NM_013440	paired immunoglobin-like type 2 receptor beta
220969_s_at	0.965098	0.825617	0.55871	0.714388		NM_030892
220943_s_at	1.03224	0.841884	0.619403	1.14818	PRO1853	NM_018607	hypothetical protein PRO1853
220938_s_at	0.987097	0.926874	0.710383	0.660804	PIF96; P96PIF	NM_006582	glucocorticoid modulatory element binding protein 1
220949_s_at	1.06158	0.937082	0.780489	0.652399	MGC5242; FLJ22450; FLJ27285	NM_024033	chromosome 7 open reading frame 49
220985_s_at	0.965404	0.827295	0.719925	0.613542	FLJ38306; DKFZP564A022	NM_030954	ring finger protein 170
220993_s_at	0.969519	0.617217	0.698323	0.664011	PSP24B; PSP24(beta)	NM_030784	G protein-coupled receptor 63
220777_at	0.965225	1.25972	0.633092	0.881329	FLJ27232; bA500C11.2	NM_022113	kinesin family member 13A
220774_at	1.06537	0.860273	0.586306	0.982443	DMC; SMC; FLJ20071; FLJ90130	NM_017653	dymeclin
220757_s_at	0.905324	0.795599	0.65159	0.685969	UBXDC2; DKFZp667D109	NM_025241	UBX domain containing 1
220603_s_at	0.94788	0.648697	0.901951	0.815723	FLJ11175; FLJ33303; MGC111402	NM_018349	multiple C2 domains, transmembrane 2
220910_at	1.05833	0.921094	0.639068	1.39799	FLJ14927; FLJ22031; KIAA1500; DKFZp686I05113; DKFZp686P08111	NM_025074	Fraser syndrome 1
220934_s_at	0.993294	0.889574	0.744372	0.645136	MGC3196	NM_024084
220843_s_at	1.09905	0.854733	0.651345	0.560461	WDSOF1	NM_014156	WD repeats and SOF1 domain containing; synonyms: Gm83, HSPC064, MGC126859, MGC138247, DKFZP564O0463; Homo sapiens WD repeats and SOF1 domain containing (WDSOF1), mRNA.
220855_at	1.05862	0.875064	0.4762	0.711668	CLTC	NM_014127	Homo sapiens PRO0456 protein (PRO0456), mRNA.
220073_s_at	1.10437	1.478	1.47519	1.92083	FLJ10665; MGC126315; MGC126353; MGC126354	NM_018173	pleckstrin homology domain containing, family G (with RhoGef domain) member 6
220035_at	1.25023	1.46375	1.03719	1.48385	GP210; POM210; FLJ22389; KIAA0906	NM_024923	nucleoporin 210kDa
219956_at	0.966285	0.607523	0.590508	0.691598	GalNAcT6; GALNAC-T6	NM_007210	UDP-N-acetyl-alpha-D-galactosamine:polypeptide N-acetylgalactosaminyltransferase 6 (GalNAc-T6)
219957_at	1.02299	0.84283	0.593237	1.00259	RABIP4R; ZFYVE13; FLJ10063; KIAA1537	NM_017987	RUN and FYVE domain containing 2
219926_at	0.78256	0.668522	0.584507	0.610637	POP3; MGC22671; bA355M14.1	NM_022361	popeye domain containing 3
219998_at	0.952931	0.990824	0.731859	0.656271	HSPC159; GRP; MGC33751; MGC71953	NM_014181	galectin-related protein
219982_s_at	0.939072	0.818775	0.610053	0.69241	FAM2B; H4F5C	NM_022978	small EDRK-rich factor 1B (centromeric)
220311_at	0.899617	0.912906	0.656917	0.560608	MTQ2; HEMK2; N6AMT; PRED28; MGC19995; C21orf127	NM_013240	N-6 adenine-specific DNA methyltransferase 1 (putative)
220266_s_at	1.14595	1.08471	1.5013	1.6382	EZF; GKLF	NM_004235	Kruppel-like factor 4 (gut)
220260_at	0.812949	0.586792	0.496057	0.547552	FLJ11082	NM_018317	TBC1 domain family, member 19
220370_s_at	1.01707	0.852901	0.631567	0.705069	DUB1	NM_025090	ubiquitin specific peptidase 36
220363_s_at	0.98687	0.761869	0.548508	0.821403	ELMO2	NM_022086	engulfment and cell motility 2 (ced-12 homolog, C. elegans)
220338_at	0.984256	0.988854	0.843464	1.48708	FLJ10244; FLJ25604; KIAA0351; dJ595C2.1	NM_018037	Ral GEF with PH domain and SH3 binding motif 2
220195_at	0.87453	0.622555	0.762251	0.649804	FLJ11113; FLJ30517; KIAA1461	NM_018328	methyl-CpG binding domain protein 5
220232_at	0.95922	1.16829	3.78748	1.69226	SCD2; SCD4; ACOD4; FADS4; HSCD5; FLJ21032	NM_024906	stearoyl-CoA desaturase 5
218661_at	0.912075	0.835965	0.628214	0.62452	FLJ14154; FLJ11693	NM_024845	hypothetical protein FLJ14154
218704_at	0.841975	0.750666	0.490237	0.616597	URCC; RNF124; FLJ20315; MGC125630; DKFZp781H0392; DKFZp781H02126	NM_017763	ring finger protein 43
218710_at	0.951408	0.883571	0.71348	0.605288	FLJ20272	NM_017735	tetratricopeptide repeat domain 27
218624_s_at	0.803198	0.788698	0.634964	0.65419	MGC2752; MGC111383; MGC149628	NM_023939	hypothetical protein MGC2752
218619_s_at	0.96126	0.75309	0.579348	0.579542	MG44; SUV39H	NM_003173	suppressor of variegation 3-9 homolog 1 (Drosophila)
218629_at	1.31202	1.56127	1.13827	1.56602	Gx; SMOH	NM_005631	smoothened homolog (Drosophila)
218628_at	0.984243	0.765302	0.61368	0.814496	CGI-116	NM_016053	coiled-coil domain containing 53
218605_at	1.01588	1.01976	0.744419	0.552556	Hkp1; FLJ22661; FLJ23182	NM_022366	transcription factor B2, mitochondrial
218612_s_at	0.95453	0.761198	0.569073	0.651036	TSSC4	NM_005706	tumor suppressing subtransferable candidate 4
218650_at	1.01636	0.88876	0.645645	0.570813	DGCR8	NM_022775	DiGeorge syndrome critical region gene 8; synonyms: Gy1, DGCRK6, C22orf12; Homo sapiens DiGeorge syndrome critical region gene 8 (DGCR8), mRNA.
218651_s_at	1.05127	1.56926	1.45229	1.54117	FLJ11196	NM_018357	La ribonucleoprotein domain family, member 6
218796_at	0.960236	0.825889	0.633417	0.946126	URP1; KIND1; DTGCU2; FLJ20116; FLJ23423	NM_017671	chromosome 20 open reading frame 42
218735_s_at	1.07351	0.897298	0.690376	0.663437	ZNF544	AA349848	Zinc finger protein 544
218737_at	0.963579	0.989776	0.571921	0.608014	Sno; MOP3; FLJ10701; FLJ10833; FLJ16176	NM_018183	strawberry notch homolog 1 (Drosophila)
218762_at	0.935978	0.488416	0.645231	0.531775	FP972; FLJ22059	NM_022752	zinc finger protein 574
218758_s_at	1.00038	0.970365	0.701551	0.563837	NNP-1; NOP52; RRP1A; D21S2056E	NM_003683	ribosomal RNA processing 1 homolog (S. cerevisiae)
218754_at	1.02052	0.885937	0.780105	0.626849	FLJ23323; MGC131821; MGC138483	NM_024654	nucleolar protein 9
218755_at	1.01342	0.613051	0.504852	0.516415	MKLP2; FLJ21151; RAB6KIFL	NM_005733	kinesin family member 20A
218470_at	1.05747	0.793537	0.73652	0.601097	CGI-04	NM_015936	CGI-04 protein
218490_s_at	0.956844	0.689321	0.721048	0.594397	HSD16; MST154; ZNF327; MSTP154; ZNF135L; ZNF140L	NM_018443	zinc finger protein 302
218496_at	0.970273	0.838585	0.714826	0.603422	RNASEH1	BG534527	Ribonuclease H1
218497_s_at	1.00429	0.930951	0.740247	0.611968	H1RNA	NM_002936	ribonuclease H1
218479_s_at	0.997794	0.912985	0.875689	0.646501	FLJ13046; KIAA1721	NM_022459	exportin 4
218408_at	1.12635	0.979786	0.787148	0.61003	TIM10; TIM10A	NM_012456	translocase of inner mitochondrial membrane 10 homolog (yeast)
218439_s_at	0.805693	0.728658	0.762571	0.652676	PTD002; FLJ11285	NM_016144	COMM domain containing 10
218441_s_at	1.0246	0.826274	0.619017	0.815791	MGC858; FLJ12732; KIAA1403; DKFZP727M111	NM_015540	RNA polymerase II associated protein 1
218570_at	0.968002	0.77997	0.737245	0.625702	BKLHD4; HSPC252; FLJ10450	NM_018095	kelch repeat and BTB (POZ) domain containing 4
218572_at	0.911102	0.729104	0.581683	0.554327	SNF7; Shax2; CHMP4B; SNF7-1; HSPC134; C14orf123; MGC142093; MGC142095	NM_014169	chromatin modifying protein 4A
218555_at	0.934106	0.777284	0.613574	0.673352	APC2; RP11-350O14.5	NM_013366	anaphase promoting complex subunit 2
218592_s_at	0.951092	0.903144	0.772339	0.650295	CECR5	NM_017829	cat eye syndrome chromosome region, candidate 5
218579_s_at	0.946912	0.795612	0.86428	0.63577	DDX35; C20orf15; FLJ22759; KAIA0875	NM_021931	DEAH (Asp-Glu-Ala-His) box polypeptide 35
218518_at	0.970687	0.750459	0.58689	0.557054	N61; KHCHP; MGC57159; DKFZp667F249	NM_016603	chromosome 5 open reading frame 5
218529_at	0.950756	0.958324	0.799443	0.642951	8D6; 8D6A	NM_016579	CD320 molecule
219125_s_at	1.01974	0.883527	0.625295	0.844161	SCP; slv; RP11-540D14.5	NM_018845	recombination activating gene 1 activating protein 1
219133_at	0.967476	0.84789	0.661631	0.64405	KS; FASN2D; FLJ20604	NM_017897	3-oxoacyl-ACP synthase, mitochondrial
219071_x_at	0.902073	0.979663	0.798871	0.638982	FLJ40907	NM_016458	chromosome 8 open reading frame 30A
219078_at	0.99187	1.12569	0.889913	0.631348	GPATC2; FLJ10252; FLJ21048; MGC74998; RP11-361K17.1	NM_018040	G patch domain containing 2
219110_at	1.01015	0.903959	0.77586	0.596588	GAR1	NM_018983	nucleolar protein family A, member 1 (H/ACA small nucleolar RNPs)
219111_s_at	1.00252	0.659785	0.793184	0.601499	DP97; MGC2835	NM_024072	DEAD (Asp-Glu-Ala-Asp) box polypeptide 54
219104_at	0.892389	0.9834	0.925261	0.646342	ZFP26; ZNF230; MGC8715	NM_016422	ring finger protein 141
219088_s_at	0.960346	0.993867	0.800144	0.612431	ZNF576	AA639585	Zinc finger protein 576
219084_at	0.951458	0.892812	0.588841	0.618493	STO; SOTOS; ARA267; FLJ22263; FLJ44628; DKFZp666C163	NM_022455	nuclear receptor binding SET domain protein 1
219274_at	1.1502	1.26354	1.434	1.67712	NET-2; TM4SF12	NM_012338	tetraspanin 12
219275_at	1.019	0.955739	0.70962	0.613807	TFAR19; MGC9294	NM_004708	programmed cell death 5
219253_at	0.99617	0.916569	0.657512	0.63854	FAM11B	NM_024121
219254_at	0.863572	1.01173	0.65032	0.608712	FLJ22222	NM_024648	hypothetical protein FLJ22222
219246_s_at	0.994954	0.924284	0.642785	0.736237	FLJ13491; FLJ37501; MGC120434; MGC120436; DKFZp686H15154	NM_024623	2-oxoglutarate and iron-dependent oxygenase domain containing 2
219258_at	0.906694	0.836658	0.730854	0.560905	FLJ20516	NM_017858	TIMELESS interacting protein
219260_s_at	1.00613	0.962251	0.806512	0.585867	DERP6; MST071; HSPC002; MSTP071	NM_015362	chromosome 17 open reading frame 81
219306_at	0.969456	0.649284	0.828286	0.858816	HKLP2; KNSL7; FLJ25667; NY-BR-62	NM_020242	kinesin family member 15
219203_at	0.997199	0.744042	0.704502	0.592758	CGI-112	NM_016049	chromosome 14 open reading frame 122
219212_at	0.934659	0.937194	0.765776	0.570669	HSP70-4; HSP70L1; MGC131990	NM_016299	heat shock 70kDa protein 14
219214_s_at	0.978818	0.857679	0.795564	0.614739	ZNF769	NM_021163	RB-associated KRAB zinc finger
219187_at	0.994268	0.985864	0.813404	0.658926	NG7; DIR1; WISP39	NM_022110	FK506 binding protein like
219200_at	0.976469	0.999365	0.790715	0.64222	MGC5297; FLJ23274; MGC142123	NM_024091	FAST kinase domains 3
219198_at	0.966212	0.914342	0.841491	0.657467	TFIII90; FLJ21002; TFIIIC90; MGC138450; TFiiiC2-90; TFIIICdelta	NM_012204	general transcription factor IIIC, polypeptide 4, 90kDa
219226_at	1.02969	0.830774	0.590227	0.583892	CRK7; CRKR; KIAA0904	NM_016507	Cdc2-related kinase, arginine/serine-rich
219221_at	0.916657	0.667547	0.666999	0.64547	ZBTB38	NM_024724	zinc finger and BTB domain containing 38; synonyms: FLJ22332, FLJ31131, FLJ35036; Homo sapiens zinc finger and BTB domain containing 38 (ZBTB38), mRNA.
218886_at	1.01683	0.890625	0.719893	0.642047	PIP1; MAK11; WDR84; hPIP1; FLJ20624; bA421M1.5; RP11-421M1.5	NM_017906	PAK1 interacting protein 1
218898_at	0.975133	0.876679	0.658293	0.625075	CT120; FLJ22282	NM_024792	family with sequence similarity 57, member A
218933_at	0.974587	0.79385	0.704295	0.626894	MGC5347; FLJ12286	NM_024063	spermatogenesis associated 5-like 1
218936_s_at	1.00501	0.837739	0.704942	0.609274	HSPC128; FLJ10294	NM_014167	coiled-coil domain containing 59
218917_s_at	0.969913	0.772003	0.708508	0.653493	ARID1A	NM_018450	AT rich interactive domain 1A (SWI- like)
218923_at	0.981169	1.03018	1.09024	1.55296	CTBS	AW304174	Chitobiase, di-N-acetyl-
218926_at	0.9393	0.789208	0.738665	0.646529	OSZF; SBBIZ1; ZBTB31	NM_018657	myoneurin
218848_at	0.977376	0.995117	0.836948	0.6413	WDR58; MGC2655	NM_024339	THO complex 6 homolog (Drosophila)
218849_s_at	0.989953	0.954976	1.09946	1.49935	RAI; IASPP; NKIP1; iASPP gene	NM_006663	protein phosphatase 1, regulatory (inhibitor) subunit 13 like
218882_s_at	1.09409	0.905304	0.731444	0.616455	FLJ12796	NM_006784	WD repeat domain 3
218879_s_at	0.883971	1.15612	0.871842	0.655933	FLJ12998; FLJ13893; MGC138262; MGC138264	NM_022764	methenyltetrahydrofolate synthetase domain containing
218860_at	0.939905	0.799807	0.734067	0.617537	NOC4; MGC3162	NM_024078	nucleolar complex associated 4 homolog (S. cerevisiae)
219010_at	1.09054	1.16862	1.08406	1.60501	FLJ10901; MGC125608	NM_018265	chromosome 1 open reading frame 106
219013_at	0.938744	0.834596	0.617926	0.844564	FLJ21634; MGC71630	NM_022087	UDP-N-acetyl-alpha-D-galactosamine:polypeptide N-acetylgalactosaminyltransferase 11 (GalNAc-T11)
219009_at	1.00934	0.62079	0.755516	0.916889	FLJ12154	NM_021944	chromosome 14 open reading frame 93
219006_at	1.06053	0.881672	0.757365	0.661213	My013; HRPAP20; HSPC125; bA22L21.1	NM_014165	chromosome 6 open reading frame 66
219041_s_at	1.05344	0.890874	0.700596	0.61571	AP4; RIP60; ZNF464; Zfp464	NM_014374	replication initiator 1
219037_at	1.1064	1.01236	0.786555	0.632501	CGI-115; KIAA0507; MGC22291	NM_016052	ribosomal RNA processing 15 homolog (S. cerevisiae)
219047_s_at	1.07057	0.831452	0.658317	0.463523	FLJ13479; FLJ14492	NM_024706	zinc finger protein 668
219031_s_at	1.02762	0.839299	0.797457	0.659427	KD93; CGI-37; HSPC031; FLJ10296	NM_016101	nuclear import 7 homolog (S. cerevisiae)
219244_s_at	1.01352	0.918105	0.709361	0.662028	LIECG2; P2ECSL; C15orf4; MGC22762	NM_022163	mitochondrial ribosomal protein L46
218984_at	0.985584	0.927101	0.728381	0.663875	FLJ20485; KIAA1897; MGC17720	NM_019042	pseudouridylate synthase 7 homolog (S. cerevisiae)
218993_at	0.952022	0.883793	0.761055	0.649465	HC90; FLJ10581	NM_018146	RNA methyltransferase like 1
218970_s_at	1.00751	0.816634	0.690307	0.651044	CGI-32; RP11-483F11.3	NM_015960	cutC copper transporter homolog (E. coli)
222770_s_at	1.04999	0.797566	0.614599	0.506224	FLJ13220	AK025248	GUF1 GTPase homolog (S. cerevisiae)
222682_s_at	0.900051	0.779282	0.584725	0.684258	C5orf3	AI307615	Chromosome 5 open reading frame 3
222715_s_at	0.965216	0.77169	0.756201	0.628327	AP1GBP1	BE856321	AP1 gamma subunit binding protein 1
222698_s_at	1.02364	0.931738	0.715876	0.660683	MGC33718	AF208694	Impact homolog (mouse)
222692_s_at	0.962148	0.528738	0.739389	0.871345	FNDC3B	BF444916	Fibronectin type III domain containing 3B
222694_at	0.987264	0.683036	0.69513	0.549113	MGC2752	AI015612	Hypothetical protein MGC2752
222703_s_at	0.92642	0.918773	0.760711	0.572191	YRDC	BE464161	YrdC domain containing (E. coli)
222704_at	1.01333	0.794026	0.733548	0.539673	POLR1A	W93584	Polymerase (RNA) I polypeptide A, 194kDa
222883_at	0.998992	0.70882	0.561441	0.654346	FLJ12439	NM_023077	chromosome 1 open reading frame 163
222854_s_at	1.02212	0.779565	0.597829	0.558324	FLJ20514	AA044921	zk77a11.s1 Soares_pregnant_uterus_NbHPU Homo sapiens cDNA clone IMAGE:488828 3', mRNA sequence.
222869_s_at	1.04528	0.758401	0.661333	0.616299	ELAC1	AI669235	ElaC homolog 1 (E. coli)
222941_at	0.944661	0.735327	0.568472	0.63715	FLJ11850	AW172493	Hypothetical protein FLJ11850
222968_at	0.881841	0.949426	0.774963	0.631673	C6orf48	NM_016947	chromosome 6 open reading frame 48
222909_s_at	1.03452	0.785573	0.801623	0.654066	SODD; BAG-4	AF111116	BCL2-associated athanogene 4
222787_s_at	0.839888	0.58484	0.801986	0.59709	TMEM106B	AV705186	Transmembrane protein 106B
222790_s_at	0.835387	0.548574	0.659543	0.796052	ROSBIN; RP11-324J2.1; DKFZp781E21150	AK022166	round spermatid basic protein 1
222792_s_at	0.993902	0.832621	0.670977	0.548258	CCDC59	AI201880	Coiled-coil domain containing 59
222845_x_at	0.998518	0.905558	0.698823	0.611524	S1R; ZPRO; CGI-119	AF161526	transmembrane BAX inhibitor motif containing 4
222821_s_at	0.930856	0.909398	0.812725	0.654579	GEMIN7	AL530748	Gem (nuclear organelle) associated protein 7
222816_s_at	0.958767	0.849903	0.827005	0.631575	ZCCHC2	BE676543	Zinc finger, CCHC domain containing 2
222819_at	0.926321	0.874108	0.693655	0.635843	FLJ43358; MGC32997; DKFZp686C17207	AK025654	CTP synthase II
222527_s_at	0.994143	1.04227	0.773981	0.609903	RBM22	AL538762	RNA binding motif protein 22
222506_at	0.985156	0.733429	0.646382	0.772078	LMBR1	AF107454	Limb region 1 homolog (mouse)
222504_s_at	0.937221	0.917237	0.725945	0.57303	NOC4; C16orf4	BC001472	COX4 neighbor
222548_s_at	0.872418	0.827849	0.529381	0.820442	MAP4K4	AL561281	Mitogen-activated protein kinase kinase kinase kinase 4
222530_s_at	0.95354	0.79243	0.705972	0.641987	KMS; MKS; BBS6; HMCS	AF275813	McKusick-Kaufman syndrome
222541_at	1.01485	0.925233	1.48944	0.862241	HBXAP	AA173588	zp04g07.s1 Stratagene ovarian cancer (#937219) Homo sapiens cDNA clone IMAGE:595452 3', mRNA sequence.
222499_at	0.985045	0.980002	0.678634	0.663015	MRPS16	BE964789	601658442R1 NIH_MGC_69 Homo sapiens cDNA clone IMAGE:3885659 3', mRNA sequence.
222500_at	1.06712	1.0132	0.752767	0.626862	CYPL1; hCyPX; MGC678; PPIase; CGI-124	BC003048	peptidylprolyl isomerase (cyclophilin)-like 1
222474_s_at	1.01326	1.04105	0.760467	0.648513	1C9-2; TOM22; MST065; MSTP065	AB041906	translocase of outer mitochondrial membrane 22 homolog (yeast)
222479_s_at	0.870336	0.8221	0.675825	0.584211	DNCLI1; FLJ10219	AK001081	dynein, cytoplasmic 1, light intermediate chain 1
222624_s_at	0.996591	0.781787	0.740159	0.593426	ZNF639	AA224199	Zinc finger protein 639
222632_s_at	0.986127	0.72378	0.741749	0.64566	LZTFL1	AA843132	Leucine zipper transcription factor-like 1
222634_s_at	0.989076	0.705248	0.667494	0.537252	C21; DC42; IRA1; TBLR1; FLJ12894	AF314544	transducin (beta)-like 1X-linked receptor 1
222615_s_at	0.99725	0.86018	0.624206	0.710666	PRKRIP1	AW206812	PRKR interacting protein 1 (IL11 inducible)
222663_at	0.965072	0.522738	0.667592	0.504127	FLJ11159	AK001697	RIO kinase 2 (yeast)
222649_at	0.872312	0.918897	0.778792	0.612171	XPO4	BF968638	Exportin 4
222576_s_at	0.979925	0.778594	0.848008	0.663537	EIF2C1	AW071829	Eukaryotic translation initiation factor 2C, 1
222584_at	0.989933	0.883545	0.742738	0.638915	MSTO1	AL573591	Misato homolog 1 (Drosophila)
222592_s_at	0.600902	0.557949	0.440473	0.414066	ACSL5	AW173691	Acyl-CoA synthetase long-chain family member 5
223251_s_at	0.844988	0.822275	0.65821	0.763555	FLJ20093; DKFZp686B07190	BC001727	ankyrin repeat domain 10
223284_at	0.97291	0.849254	0.721482	0.601072	KLP1	AB038651	N-acetyltransferase 14
223286_at	0.930113	0.916317	0.703881	0.555567	DERP6; MST071; HSPC002; MSTP071	BC002762	chromosome 17 open reading frame 81
223281_s_at	0.96084	0.760308	0.696463	0.631796	COX15	AF026850	COX15 homolog, cytochrome c oxidase assembly protein (yeast)
223200_s_at	1.00056	0.806587	0.716786	0.600226	LSG1	AI219740	Large subunit GTPase 1 homolog (S. cerevisiae)
223233_s_at	1.11667	1.28315	1.39484	1.56056	FLJ39281; KIAA1319; DKFZp779N1112	AF263462	cingulin
223236_at	0.987031	0.693794	0.665344	0.603582	HSPC095; FLJ37233; DKFZP434K1421	AL136806	coiled-coil domain containing 55
223230_at	0.973342	1.0129	0.710728	0.607453	PRPF38A	AL521713	PRP38 pre-mRNA processing factor 38 (yeast) domain containing A
223363_at	1.00651	0.924511	0.748719	0.629937	PAC3; MGC10911	BC004308	chromosome 7 open reading frame 48
223364_s_at	0.942245	0.714183	0.606158	0.600814	DDX37; MGC2695; MGC4322; FLJ41974; KIAA1517; MGC46245	BC004463	DEAH (Asp-Glu-Ala-His) box polypeptide 37
223347_at	0.934512	0.763059	0.663623	0.620078	MUM-1; HSPC211; FLJ14868; FLJ22283; MGC131891; MGC163315	AL360266	melanoma associated antigen (mutated) 1
223342_at	1.0468	0.961601	1.24052	1.43545	p53R2; MGC42116; MGC102856; DKFZp686M05248	AB036063	ribonucleotide reductase M2 B (TP53 inducible)
223402_at	0.933678	0.840101	0.626444	0.622386	VHZ; MOSP; LDP-3; DUSP25; FLJ20442; RP11-190A12.1	BC001140	dual specificity phosphatase 23
223302_s_at	0.996338	1.00093	0.812089	0.616992	VIK; VIK-1; MGC5521; FLJ23461; MGC10859; MGC16203; DKFZp686M1631	BC004288	zinc finger protein 655
223310_x_at	1.00345	0.997789	1.27598	1.48583	IPLA2G; IPLA2-2; IPLA2(GAMMA)	AF217519	patatin-like phospholipase domain containing 8
223308_s_at	0.916306	0.983459	0.821028	0.614466	WDR5	AL521101	WD repeat domain 5
223294_at	0.983276	0.801821	0.626251	0.573421	MGC874	BC001220	chromosome X open reading frame 26
223332_x_at	0.924561	0.971476	0.670014	0.574672	MGC1022; FLJ20552; MGC14317	BC001442	ring finger protein 126
223339_at	0.894629	0.713953	0.602237	0.659456	ATPIF1	BC001867	Homo sapiens cDNA clone IMAGE:3536204, **** WARNING: chimeric clone ****.
223334_at	0.965993	0.880496	0.707692	0.530788	DKFZp586C1924	AL136941	transmembrane protein 126A
223319_at	0.854929	0.6671	0.672908	0.637841	GPH; GEPH; GPHRYN; KIAA1385	AF272663	gephyrin
223052_x_at	0.754312	0.67135	0.743786	0.499391	HSPC182; FLJ13048; PNAS-120	AF277178	SSU72 RNA polymerase II CTD phosphatase homolog (S. cerevisiae)
223053_x_at	0.836711	0.867334	0.773253	0.626088	HSPC182; FLJ13048; PNAS-120	AF277178	SSU72 RNA polymerase II CTD phosphatase homolog (S. cerevisiae)
223036_at	0.963211	0.642678	0.448446	0.592216	FRSB; PheHB; PheRS; FARSLB; HSPC173	D84430	phenylalanyl-tRNA synthetase, beta subunit
223035_s_at	0.908809	0.920944	0.757239	0.604171	FRSB; PheHB; PheRS; FARSLB; HSPC173	AF161521	phenylalanyl-tRNA synthetase, beta subunit
223023_at	0.968561	0.968228	0.646644	0.671497	GS15; BET1L1; HSPC197	BC000688	blocked early in transport 1 homolog (S. cerevisiae)-like
223019_at	0.989908	0.788954	0.658179	0.732312	OC58; MEG-3; C9orf88; FLJ13518; FLJ22151; FLJ22298; bA356B19.6; DKFZP434H0820; RP11-356B19.6	BC001979	family with sequence similarity 129, member B
223151_at	0.985003	0.92467	0.769122	0.6372	MGC2714; FLJ32431	BC004169	DCN1, defective in cullin neddylation 1, domain containing 5 (S. cerevisiae)
223147_s_at	0.948343	0.968692	0.723793	0.648364	WDC146; FLJ11294	AB044749	WD repeat domain 33
223144_s_at	0.886681	0.628019	0.629215	0.783311	FLJ10342; dJ486L4.2	BC000764	chromosome 6 open reading frame 166
223140_s_at	0.953944	0.679522	0.69778	0.648514	DDX36; MLEL1; KIAA1488	AF217190	DEAH (Asp-Glu-Ala-His) box polypeptide 36
223180_s_at	0.975333	0.994214	0.784465	0.652557	HSPC154	BC000892	chromosome 18 open reading frame 55
223096_at	1.00399	0.868635	0.696978	0.641476	NOP5/NOP58; HSPC120	AF161469	nucleolar protein NOP5/NOP58
223081_at	1.00612	0.848107	0.673434	0.660149	MGC2941; FLJ16355; FLJ22884; hJUNE-1b	BC002509	PHD finger protein 23
223088_x_at	0.992937	0.880951	0.838398	0.630167	dJ351K20.2; DKFZp762M1110	BC003549	enoyl Coenzyme A hydratase domain containing 1
223115_at	1.00185	0.788173	0.758548	0.641806	MED17; CRSP77; DRIP80; TRAP80; FLJ10812	AK001674	cofactor required for Sp1 transcriptional activation, subunit 6, 77kDa
223112_s_at	0.964936	0.913666	0.766223	0.647339	PDSW	AF044954	NADH dehydrogenase (ubiquinone) 1 beta subcomplex, 10, 22kDa
223113_at	1.02845	0.91549	0.718925	0.568072	HSPC196	AF151030	transmembrane protein 138
221637_s_at	0.935745	0.847967	0.649681	0.605773	MGC2477	BC001434	chromosome 11 open reading frame 48
221649_s_at	1.02316	0.979739	0.658164	0.519089	SSF; SSF1; SSF2; BXDC3; MGC14226; MGC45852	BC000535	peter pan homolog (Drosophila)
221617_at	0.939618	0.733763	0.602534	0.650113	TAF9L	AF077053	DN-7; Homo sapiens neuronal cell death-related protein mRNA, complete cds.
221683_s_at	0.970193	0.421031	0.851656	0.625079	MKS4; rd16; JBTS5; JBTS6; LCA10; NPHP6; SLSN6; 3H11Ag; FLJ13615; FLJ21979; KIAA0373	AF317887	centrosomal protein 290kDa
221673_s_at	1.05333	0.796894	0.84236	0.648078	CSNK1G1	AB042563	casein kinase 1, gamma 1
221570_s_at	1.01564	0.862157	0.71182	0.590038	HSPC133; FLJ10459	AF201938	methyltransferase like 5
221545_x_at	0.909164	0.904043	0.703492	0.60776	MED16; DRIP92; TRAP95	AF106934	thyroid hormone receptor associated protein 5
221548_s_at	1.00802	0.825046	0.801159	0.597679	MGC4846; FLJ10181; PP2C-DELTA; DKFZP434J2031	AY024365	integrin-linked kinase-associated serine/threonine phosphatase 2C
221598_s_at	0.910818	0.679791	0.643785	0.618973	MED27; CRAP34; CRSP34; TRAP37; MGC11274	BC002878	cofactor required for Sp1 transcriptional activation, subunit 8, 34kDa
221587_s_at	0.968592	0.824683	0.632294	0.617861	FLJ20640	BC000890	chromosome 19 open reading frame 24
221778_at	0.937253	0.608186	0.847945	1.3089	JHDM1D	BE217882	Jumonji C domain-containing histone demethylase 1 homolog D (S. cerevisiae)
221768_at	0.939689	0.841585	0.598014	0.784572	SFPQ	AV705803	Splicing factor proline/glutamine-rich (polypyrimidine tract binding protein associated)
221773_at	1.10074	1.06321	1.2816	1.57075	ELK3	AW575374	ELK3, ETS-domain protein (SRF accessory protein 2)
221774_x_at	0.859125	0.737289	0.725111	0.617725	FAM48A	AW003334	Family with sequence similarity 48, member A
221809_at	0.915692	0.919737	0.725862	0.538381	FLJ31165; KIAA1464	AB040897	RAN binding protein 10
221797_at	1.06568	0.790744	0.670009	0.572521	LOC339229; MGC104712	AY007126	hypothetical protein LOC339229
221712_s_at	0.987772	1.04279	0.85092	0.646995	FLJ10439; FLJ21730	BC006351	WD repeat domain 74
221705_s_at	0.906938	0.603781	0.838158	0.748072	SIKE; FLJ21168; DKFZp686A0768; RP5-1000E10.4	BC005934	suppressor of IKK epsilon
221207_s_at	1.07993	0.717849	0.638255	0.864817	BCL8B; LYST2	NM_015678	neurobeachin
221206_at	0.832328	0.796023	0.616734	0.674854		NM_024521
221264_s_at	0.971513	0.773976	0.758307	0.598109	TARDBP	NM_031214	TAR DNA binding protein; synonym: TDP-43; TAR DNA-binding protein-43; Homo sapiens TAR DNA binding protein (TARDBP), mRNA.
221274_s_at	0.999682	0.672686	0.656975	0.585398	VIPL; MGC11139; DKFZp564L2423	NM_030805	lectin, mannose-binding 2-like
221185_s_at	0.786808	0.951002	0.83043	0.62414	IQCG	NM_025111	IQ motif containing G; synonyms: FLJ11667, FLJ23571, DKFZp434B227; Homo sapiens IQ motif containing G (IQCG), mRNA.
221090_s_at	0.923368	0.899666	0.7201	0.663855	TPA1; FLJ10826; KIAA1612	NM_018233	2-oxoglutarate and iron-dependent oxygenase domain containing 1
221509_at	1.02757	0.851306	0.645066	0.52688	DRP; DRP1; SMAP-3	AB014731	density-regulated protein
221516_s_at	0.980462	0.845282	0.653791	0.67679	FLJ20232; HSU79252; dJ1104E15.3	BC002587	Smith-Magenis syndrome chromosome region, candidate 7-like
221514_at	0.949936	0.890335	0.643588	0.573635	KIAA0266; NY-CO-16; SDCCAG16; dJ537K23.3	BC001149	UTP14, U3 small nucleolar ribonucleoprotein, homolog A (yeast)
221528_s_at	0.921203	0.620088	0.6145	0.689368	CED12; CED-12; ELMO-2; FLJ11656; KIAA1834	BC000143	engulfment and cell motility 2
221434_s_at	0.978268	0.96467	0.705116	0.560887	DC50; SLIRP; PD04872	NM_031210	chromosome 14 open reading frame 156
221290_s_at	0.916433	0.664136	0.816754	0.550072	MUM1	NM_016473	melanoma associated antigen (mutated) 1; synonyms: MUM-1, HSPC211, FLJ14868, FLJ22283, MGC131891, MGC163315; Homo sapiens melanoma associated antigen (mutated) 1 (MUM1), mRNA.
221311_x_at	0.999104	0.885762	0.718554	0.610428	FLJ21130; DJ122O8.2; MGC104253	NM_020466	LYR motif containing 2
221326_s_at	1.16684	1.01286	1.41749	1.54776	TUBD; FLJ12709	NM_016261	tubulin, delta 1
222237_s_at	0.95481	0.509543	0.557416	0.685334	ZNF228	AC084239
222231_s_at	0.913267	0.897669	0.754552	0.636071	PRO1855; FLJ21675	AK025328	leucine rich repeat containing 59
222282_at	0.983394	0.881555	0.472913	0.62653		AV761453	AV761453 MDS Homo sapiens cDNA clone MDSBZA03 5', mRNA sequence.
222270_at	0.774728	0.697335	0.682551	0.451672	SMEK2	BG540048	SMEK homolog 2, suppressor of mek1 (Dictyostelium)
222141_at	0.958757	0.842471	0.561552	1.00412	KELCHL	AK024369	kelch-like 22 (Drosophila)
222206_s_at	0.968502	0.901033	0.794754	0.640457	NCLN	AA781143	Nicalin homolog (zebrafish)
222180_at	0.959442	0.809833	0.612859	0.693754	YES1	AU147889	CDNA FLJ14122 fis, clone MAMMA1002033
222193_at	0.926149	0.733273	0.674132	0.643482	C2orf43	AK021672	Chromosome 2 open reading frame 43
222400_s_at	1.04259	1.06929	0.807743	0.632988	ARD; APL1; SIPL; MTCBP-1; FLJ10913; HMFT1638	BC001467	acireductone dioxygenase 1
222439_s_at	0.896825	0.526049	0.510326	0.323045	THRAP3	BE967048	601660780R1 NIH_MGC_72 Homo sapiens cDNA clone IMAGE:3915883 3', mRNA sequence.
222425_s_at	0.979362	0.819959	0.718639	0.576328	POLDIP2	AW151250	Polymerase (DNA-directed), delta interacting protein 2
222303_at	0.932708	0.809723	0.556197	0.612004	ETS2	AV700891	Transcribed locus
222311_s_at	1.00177	0.82786	0.49541	0.719131	SFRS15	AA648521	Splicing factor, arginine/serine-rich 15
222366_at	1.01353	0.684638	0.490976	0.637293	IGHG1	W86781	Transcribed locus
221939_at	0.956733	0.798771	0.651749	0.706502	YIPF2	AL529396	Yip1 domain family, member 2
221919_at	0.942824	0.762607	0.643148	0.738999	LOC728844	AW450929	Hypothetical protein LOC728844
221923_s_at	0.993027	0.922471	0.820145	0.603909	NPM1	AA191576	Nucleophosmin (nucleolar phosphoprotein B23, numatrin)
221821_s_at	0.982803	0.98229	0.641614	0.734005	FLJ12670; FLJ20436	AK022732	chromosome 12 open reading frame 41
221829_s_at	1.00019	0.71997	0.668226	0.535804	TNPO1	AI307759	Transportin 1
221860_at	0.996752	0.933079	0.532535	0.591999	HNRPL	AL044078	Transcribed locus
222052_at	0.89597	0.700825	0.601038	0.746001	C19orf54	AA001552	Chromosome 19 open reading frame 54
222045_s_at	1.02226	1.20513	1.02201	0.633625	C20orf67	AI199589	Chromosome 20 open reading frame 67
222047_s_at	1.0026	0.907202	0.75371	0.65603	ARS2	AI523895	ARS2 protein
222064_s_at	1.04284	0.978982	0.735645	0.580615	AARSD1	AI093187	Alanyl-tRNA synthetase domain containing 1
222065_s_at	0.949377	0.811612	0.622639	0.724602	FLII	AI830227	Flightless I homolog (Drosophila)
222067_x_at	0.89503	0.813935	0.728922	0.551862	HIST1H2BD	AL353759
222040_at	1.03381	0.844415	0.481872	0.56292	LOC728844	AI144007	Hypothetical protein LOC728844
222041_at	0.924186	0.838756	0.809328	0.558978	DPH1	BG235929	DPH1 homolog (S. cerevisiae)
222109_at	0.941851	0.895075	0.54637	0.616636	GNL3L	AA558583	Guanine nucleotide binding protein-like 3 (nucleolar)-like
221987_s_at	0.961243	0.866204	0.765477	0.587147	TSR1	AI803633	TSR1, 20S rRNA accumulation, homolog (S. cerevisiae)
221963_x_at	0.938183	0.778948	0.703137	0.615133	NUMA1	BE999967	Transcribed locus
222016_s_at	0.963206	0.745982	0.549973	0.455346	ZNF323	AW086021	Zinc finger protein 323
222018_at	0.991912	0.945862	0.562565	0.599097	NACA	AI992187	Nascent polypeptide-associated complex alpha subunit
221995_s_at	0.87698	0.722969	0.663577	0.638137	MRP63	BF195165	Mitochondrial ribosomal protein 63
221988_at	0.956719	0.913541	0.65525	0.738489	CRSP7	AA463853	Cofactor required for Sp1 transcriptional activation, subunit 7, 70kDa
221989_at	1.00703	0.88895	0.602779	0.645893	RPL10	AW057781	Ribosomal protein L10
221992_at	1.0038	0.995517	0.646822	0.921632	LOC440348	AI925734	Similar to nuclear pore complex interacting protein
238831_at	0.967749	0.76487	0.861266	0.642997	FLJ10525	BF114679	Transcribed locus
238822_at	1.0585	0.91315	0.955848	0.586003		AI743753	Transcribed locus
238902_at	1.07918	1.58708	1.32668	1.47052	DPH2	T85248	Transcribed locus
238860_at	1.02046	0.815091	0.630197	0.766785	C6orf130	AA398043	Chromosome 6 open reading frame 130
238880_at	0.90092	0.85754	0.594911	0.715219	GTF3A	AI241331	General transcription factor IIIA
238883_at	1.05631	0.839024	0.509969	0.73114	TMEM123	AW975051	Transcribed locus
238738_at	0.982651	0.916873	0.628458	0.625074	PSMD7	AW361702	Proteasome (prosome, macropain) 26S subunit, non-ATPase, 7 (Mov34 homolog)
238743_at	1.12426	1.10465	1.62923	1.42696	FLJ38348	BG251692	602363588F1 NIH_MGC_90 Homo sapiens cDNA clone IMAGE:4471940 5', mRNA sequence.
238785_at	0.988926	0.772995	0.653435	0.827711	TMC5	AI632091	Transcribed locus
238803_at	0.816984	0.568745	0.43456	0.413665	HECTD2	AA633619	HECT domain containing 2
238760_at	0.976983	0.901068	0.526752	0.738274	YARS	AW452122	Tyrosyl-tRNA synthetase
238762_at	0.992669	0.76216	0.69177	0.58262	MTHFD2L	AA702016	Methylenetetrahydrofolate dehydrogenase (NADP+ dependent) 2-like
238774_at	0.871097	0.768436	0.378859	0.515457	CRSP2	AW960454	EST372525 MAGE resequences, MAGF Homo sapiens cDNA, mRNA sequence.
238775_at	1.01001	0.936757	0.661	0.694861	ITFG1	AA088543	Transcribed locus
238769_at	0.94648	0.80088	0.54715	0.5575	MAP4K4	AW450572	Transcribed locus
239071_at	1.00976	0.880686	0.571203	0.767159	RBBP4	AI972451	Retinoblastoma binding protein 4
239086_at	1.00823	0.962645	0.590129	0.889997	ABO	BE501810	Transcribed locus
239083_at	0.940729	0.653717	0.62437	0.599048	ZNF786	AI560246	Zinc finger protein 786
239046_at	0.926533	0.652498	0.822157	0.504618	PNN	AA322245	Transcribed locus
239040_at	0.922424	0.548513	0.389424	0.351412	HNRPD	AW967813	Heterogeneous nuclear ribonucleoprotein D (AU-rich element RNA binding protein 1, 37kDa)
239101_at	0.889024	0.618403	0.521818	0.692161	ITCH	AI095270	Itchy homolog E3 ubiquitin protein ligase (mouse)
238935_at	1.128	1.02381	1.40593	1.28886	RPS27L	AW958475	EST370545 MAGE resequences, MAGE Homo sapiens cDNA, mRNA sequence.
238953_at	0.95998	0.781499	0.795288	0.621512	SMAD3	AA993833	CDNA clone IMAGE:5206119
238924_at	1.10451	1.70498	1.1801	1.49165	LOC399761	BF516429	Hypothetical protein LOC399761
239014_at	0.873859	0.897114	0.588782	0.808728	CCAR1	W73136	Cell division cycle and apoptosis regulator 1
239007_at	1.09272	0.814204	0.949854	0.643207	ZNF616	BG170845	Zinc finger protein 616
238982_at	0.93357	0.652799	0.47917	0.551002	DENR	AW665791	Density-regulated protein
238970_at	0.950639	0.72361	0.578086	0.737952	VPS16	BF509781	Transcribed locus
238977_at	1.03272	1.42337	0.963038	0.95013	MCM6	R54683	yj74f11.s1 Soares breast 2NbHBst Homo sapiens cDNA clone IMAGE:154509 3', mRNA sequence.
239001_at	0.93286	0.650148	0.597336	0.629633	MGST1	AV705233	Microsomal glutathione S-transferase 1
238449_at	0.866177	0.901743	0.664312	0.790127		BG534511	602553754F1 NIH_MGC_77 Homo sapiens cDNA clone IMAGE:4663452 5', mRNA sequence.
238451_at	1.30587	1.31386	1.31869	1.48482	MPP7	BF693302	602081105F1 NIH_MGC_81 Homo sapiens cDNA clone IMAGE:4245577 5', mRNA sequence.
238519_at	0.964693	0.79035	0.656652	0.643624	RSC1A1	BG179828	Regulatory solute carrier protein, family 1, member 1
238510_at	0.977238	0.619183	0.59156	0.730673	ZNF720	AA744964	Zinc finger protein 720
238496_at	1.09367	1.11582	1.27023	1.49895	WHSC1L1	AA741074	Transcribed locus
238303_at	0.987571	0.713621	0.624055	0.719917	STT3B	AW070371	STT3, subunit of the oligosaccharyltransferase complex, homolog B (S. cerevisiae)
238315_s_at	0.85833	0.563445	0.728781	0.709559	ZNF567	BF061829	Zinc finger protein 567
238295_at	0.994337	0.854671	0.610584	0.673525	C17orf42	N22706	Chromosome 17 open reading frame 42
238317_x_at	0.991187	0.672227	0.563048	0.938604	SRI	BF439728	nad13a08.x1 NCI_CGAP_Lu24 Homo sapiens cDNA clone IMAGE:3365271 3', mRNA sequence.
238172_at	0.953719	0.919574	0.542102	0.563402	DIABLO	AA192765	zq12e02.s1 Stratagene muscle 937209 Homo sapiens cDNA clone IMAGE:629498 3', mRNA sequence.
238210_at	0.971985	0.711752	0.510341	0.758997	GLUD1	AW137224	Transcribed locus
238423_at	1.24226	1.05469	1.05469	1.26466	SLP3; MGC105130; MGC118883; MGC118884; MGC118885	AI674404	synaptotagmin-like 3
238419_at	0.887187	0.647453	0.590599	0.51935	PHLDB2	T68150	Pleckstrin homology-like domain, family B, member 2
238431_at	0.971546	0.758033	0.652814	0.685194		W68845	Transcribed locus
238427_at	1.19238	1.91628	1.6816	1.43932	GRPEL2	C15005	GrpE-like 2, mitochondrial (E. coli)
238417_at	1.01032	0.95663	1.58979	2.2373	PGM2L1	BE138757	Phosphoglucomutase 2-like 1
238646_at	1.09941	0.85642	0.770757	0.635103		AA747756	Transcribed locus
238619_at	1.0617	0.849243	0.406373	0.583374	FLJ43663	AA417078	CDNA FLJ26188 fis, clone ADG04821
238635_at	0.990423	0.845472	0.537692	0.624981	C5orf28	W72333	Chromosome 5 open reading frame 28
238624_at	0.985381	0.825301	0.607734	0.7359	NLK	AA688152	Transcribed locus
238628_s_at	1.04974	1.07722	0.570416	0.527041	TRAPPC2L	AW827150	Trafficking protein particle complex 2-like
238706_at	1.12537	0.814573	0.602939	0.741345	PAPD4	BG168850	PAP associated domain containing 4
238701_x_at	0.979764	0.9822	1.69162	1.09979	FLJ45803	BE176566	FLJ45803 protein
238673_at	0.78785	0.496511	0.77704	0.770094		AV724325	Clone TEC_AC113188.2-001_REV mRNA sequence
238662_at	0.899592	0.839026	0.665909	0.513235	ATPBD4	BE884544	ATP binding domain 4
238677_at	0.954562	0.709696	0.524694	0.651826	WDR36	AA235202	WD repeat domain 36
238435_at	1.00919	0.808451	0.578281	0.528362	LOC340591	AA521288	Transcribed locus, moderately similar to XP_001139130.1 carbonic anhydrase VB, mitochondrial [Pan troglodytes]
238593_at	1.03638	1.33698	1.11084	1.99793	C11orf80	AW962511	Chromosome 11 open reading frame 80
238595_at	1.17167	1.55575	1.1412	1.57165		AV702101	Transcribed locus
238592_at	0.966469	0.750876	0.640957	0.84084	PDLIM3	BE840636	PDZ and LIM domain 3
239937_at	0.926457	0.720912	0.410002	0.829414	ZNF207	AI860558	Zinc finger protein 207
239957_at	0.981602	0.656339	0.431215	0.740839	SETD5	AW510793	hd39h04.x1 Soares_NFL_T_GBC_S1 Homo sapiens cDNA clone IMAGE:2911927 3', mRNA sequence.
239960_x_at	0.830215	0.676932	0.886577	0.592241	LYRM7	AW303539	Lyrm7 homolog (mouse)
239946_at	0.875877	0.912366	0.433288	0.747273	KIAA0922	AA776723	ah49e02.s1 Soares_testis_NHT Homo sapiens cDNA clone 1292858 3', mRNA sequence.
239948_at	1.02605	0.663517	0.472403	0.48825	NUP153	AA004800	Nucleoporin 153kDa
239898_x_at	1.00599	0.874972	0.930781	0.654352	ZNF286A	AI498484	Zinc finger protein 286A
239900_x_at	0.747098	0.756064	0.552217	0.490523		AI922404	wn91g07.x1 NCI_CGAP_Ut1 Homo sapiens cDNA clone IMAGE:2453244 3' similar to contains Alu repetitive element;, mRNA sequence.
240062_at	0.591526	0.389697	0.487216	0.489326	FAM3C	AW241945	Family with sequence similarity 3, member C
240044_x_at	0.854818	0.520652	0.592177	0.663429	TNRC6B	AI864078	Trinucleotide repeat containing 6B
239973_at	1.04015	0.857087	0.658476	0.695172	GSTK1	AW450675	Full-length cDNA clone CS0DJ013YE21 of T cells (Jurkat cell line) Cot 10-normalized of Homo sapiens (human)
239978_at	1.02786	1.04275	0.5716	0.840784	SPOP	BF109370	7l62a08.x1 Soares_NSF_F8_9W_OT_PA_P_S1 Homo sapiens cDNA clone IMAGE:3525806 3', mRNA sequence.
240016_at	0.952358	0.805806	0.46921	0.612473	SENP6	AW273732	Transcribed locus
240004_at	1.02704	0.798517	0.626406	0.643342	GRM3	BF436080	Transcribed locus
240008_at	0.88638	0.766508	0.540278	0.449916	CSH2	AI955765	Transcribed locus
239794_at	1.04316	0.82426	0.506717	0.56647	IARS	AI356405	Transcribed locus
239814_at	0.852804	0.723001	0.622781	0.721551		AI459203	Full-length cDNA clone CS0DI009YJ20 of Placenta Cot 25-normalized of Homo sapiens (human)
239818_x_at	1.38227	2.10527	1.72983	1.49467	TRIB1	AA576947	Tribbles homolog 1 (Drosophila)
239808_at	1.21712	1.84381	1.05132	1.82753	FOXL2	AI084489	Transcribed locus
239758_at	0.921423	0.758871	0.348987	0.581166	BCR	AI142126	ow61h10.x1 Soares_NSF_F8_9W_OT_PA_P_S1 Homo sapiens cDNA clone IMAGE:1651363 3', mRNA sequence.
239788_at	0.763991	0.543315	0.458252	0.444837	SMU1	AW207642	Transcribed locus
239892_at	0.940029	0.709139	0.425123	0.624751	AGT	AW593666	Transcribed locus
239896_at	0.987352	0.600452	0.757083	0.817344	NRG2	AW190479	Clone TESTIS-809 mRNA sequence
240370_at	1.05052	1.05134	0.566656	1.04519		AI432451	Transcribed locus
240304_s_at	1.1508	0.717304	0.731347	0.520416	TMC5	BG484769	Transmembrane channel-like 5
240314_at	0.918947	0.656968	0.462099	0.577243	NCOR1	AI018235	Full length insert cDNA clone ZE12G01
240296_at	0.968213	0.657518	0.594401	0.761201	TEF	BF224366	7q86e10.x1 NCI_CGAP_Lu24 Homo sapiens cDNA clone IMAGE:3705307 3', mRNA sequence.
240326_at	0.976267	0.962925	0.53969	0.767446		AV700865	AV700865 GKC Homo sapiens cDNA clone GKCDAH05 3', mRNA sequence.
240344_x_at	0.925335	0.712184	0.696182	0.664634	LYRM7	AA424065	Lyrm7 homolog (mouse)
240510_at	0.980837	1.05667	0.746149	0.647405	NBN	H66741	Nibrin
240528_s_at	0.868439	0.729164	0.719945	0.510912	EXOC4	AI964022	Exocyst complex component 4
240499_at	0.976093	0.818438	0.5382	0.815932	WIRE	AA482221	Transcribed locus
240529_at	1.00359	1.01365	0.648276	0.962894	MITF	AI740661	wg07b01.x1 Soares_NSF_F8_9W_OT_PA_P_S1 Homo sapiens cDNA clone IMAGE:2364361 3' similar to contains Alu repetitive element;, mRNA sequence.
240451_at	1.07749	0.835	0.570626	0.64318	RPS6KB1	AA004844	zh90b02.s1 Soares_fetal_liver_spleen_1NFLS_S1 Homo sapiens cDNA clone IMAGE:428523 3' similar to contains Alu repetitive element;, mRNA sequence.
240446_at	0.942742	0.784267	0.614897	0.771714	STAT1	AI798164	we84e12.x1 Soares_NFL_T_GBC_S1 Homo sapiens cDNA clone IMAGE:2347822 3' similar to contains Alu repetitive element;contains element L1 repetitive element ;, mRNA sequence.
240449_at	0.990056	0.749729	0.590544	0.69112	ZNF341	AW204518	Zinc finger protein 341
240478_at	1.01466	0.892539	0.551893	0.55756	CYP2E1	AA648983	ns41f06.s1 NCI_CGAP_GCB1 Homo sapiens cDNA clone IMAGE:1186211 3' similar to contains L1.t1 L1 repetitive element ;, mRNA sequence.
240168_at	1.05626	0.738201	0.467165	0.504769	XPO7	AA679589	Exportin 7
240247_at	1.01619	0.686331	0.563184	0.758781	FAM7A2	AI653240	wb44c02.x1 NCI_CGAP_GC6 Homo sapiens cDNA clone IMAGE:2308514 3', mRNA sequence.
240282_at	0.988113	0.839315	0.607278	0.629847	WDR1	AW770902	WD repeat domain 1
240217_s_at	0.971063	0.865297	0.659305	0.50039		AW504713	Transcribed locus
240216_at	0.866594	0.48925	0.274006	0.453552	IGHG1	AI805550	Transcribed locus
240231_at	1.00889	0.856925	0.540686	0.793493	FOXL2	AI742383	Transcribed locus
239367_at	0.735672	0.564502	0.584472	0.818636	BDNF	AI127530	Brain-derived neurotrophic factor
239333_x_at	0.970591	0.780653	0.643844	0.90273	LOC51064	BF525633	602069748F1 NCI_CGAP_Brn64 Homo sapiens cDNA clone IMAGE:4212730 5', mRNA sequence.
239331_at	1.00189	0.682392	0.436615	0.487697	FLJ43663	AW954199	Transcribed locus
239409_at	0.952157	0.610699	0.509936	0.880231	RAP1A	AA828280	ob60b01.s1 NCI_CGAP_GCB1 Homo sapiens cDNA clone IMAGE:1335721 3' similar to gb:J03171 INTERFERON-ALPHA RECEPTOR PRECURSOR (HUMAN);, mRNA sequence.
239392_s_at	1.01197	0.760696	0.670533	0.552192	POGK	AI983896	Transcribed locus
239212_at	0.993731	0.724715	0.424968	0.708948	LTV1	AW236214	LTV1 homolog (S. cerevisiae)
239207_at	0.941766	0.666331	0.641853	0.674127	JARID1C	BE503653	Jumonji, AT rich interactive domain 1C
239228_at	1.08197	1.01215	0.53152	0.688838	CSNK2A1	AI298887	Transcribed locus
239175_at	0.895268	0.693427	0.538195	0.673347	CD46	AW203986	Transcribed locus
239264_at	0.901711	0.654707	0.361544	0.683291	EXOC4	AW973078	Transcribed locus
239278_at	0.92595	0.843674	0.716162	0.662759		AI471969	CDNA clone IMAGE:5301129
239238_at	1.06756	1.04934	0.528239	0.758937	SMARCC1	AI208857	qg45b01.x1 Soares_testis_NHT Homo sapiens cDNA clone IMAGE:1838089 3', mRNA sequence.
239232_at	0.99032	1.17159	0.641724	1.18073	MSI2	AA521410	Musashi homolog 2 (Drosophila)
239651_at	0.938568	1.01604	0.575066	1.17575	ANAPC5	BE671583	Anaphase promoting complex subunit 5
239646_at	0.830175	0.648269	0.36568	0.605801	DIP2A	BF003148	Transcribed locus
239629_at	0.943719	0.948087	0.609229	0.940229	CFLAR	AI634046	CASP8 and FADD-like apoptosis regulator
239731_at	0.965534	0.893012	0.603352	0.661738	HBM	AI674685	Transcribed locus
239694_at	0.995709	1.19642	1.34359	1.88946	TRIM7	AA527412	Tripartite motif-containing 7
239487_at	0.832392	0.613096	0.672895	0.645784	FAM98A	AI743261	Family with sequence similarity 98, member A
239448_at	0.992661	0.664898	0.456743	0.63185	SMAD3	AI475033	Transcribed locus
239561_at	0.936227	0.667292	0.501237	0.719671	TMEM123	AA780679	ac70h03.s1 Stratagene fetal retina 937202 Homo sapiens cDNA clone IMAGE:867989 3', mRNA sequence.
239545_at	0.952675	0.746039	0.477792	0.794695	CASD1	AI335004	tb21e09.x1 NCI_CGAP_Kid12 Homo sapiens cDNA clone IMAGE:2055016 3', mRNA sequence.
239539_at	0.983238	0.806085	0.56083	0.769246	NEK3	AI291210	Transcribed locus
236000_s_at	0.982523	0.665068	0.499432	0.497222	HNRPD	AA863112	Transcribed locus
235993_at	0.93648	0.84787	0.835022	0.602389	PSMF1	T81639	Transcribed locus
236032_at	0.873563	0.822898	0.751239	0.661306	DNM1L	AA131302	Transcribed locus
236046_at	0.719911	0.539023	0.740153	0.597843	FLJ44896	AA781880	FLJ44896 protein
236007_at	1.00201	1.00211	0.575967	0.736995	AKAP10	AU147278	A kinase (PRKA) anchor protein 10
235882_at	0.906594	0.753756	0.529101	0.579578	FLJ10979	BF115777	Transcribed locus
235889_at	1.03405	0.949638	0.995343	1.5072		AI825987	Transcribed locus
235847_at	0.962366	1.11103	0.546033	1.03852	ARSB	BF111312	Transcribed locus
235921_at	1.1392	1.29391	1.15435	1.58942		AI761207	Transcribed locus
235938_at	0.94377	0.843127	0.549202	0.963329		AI018174	Transcribed locus
235927_at	0.98691	0.931917	0.541131	0.793345	XPO1	BE350122	Exportin 1 (CRM1 homolog, yeast)
235902_at	1.12504	0.848656	0.539419	0.808786	LOC646139	AI090764	Transcribed locus
235894_at	0.995575	0.865516	0.491086	0.546357	KHDRBS1	AW444899	Transcribed locus
236250_at	0.949006	0.882095	0.547602	0.707853	AFG3L1	AI859065	AFG3 ATPase family gene 3-like 1 (S. cerevisiae)
236219_at	0.983456	0.832018	0.843445	0.62672	TMEM20	AI452512	Transcribed locus
236355_s_at	0.976293	0.717044	0.56144	0.687862		AI076172	Transcribed locus
236273_at	0.843408	0.606958	0.616521	0.482822	NBPF1	AW269499	Neuroblastoma breakpoint family, member 1
236104_at	0.930981	0.640029	0.819632	0.791446	LOC92906	BF061515	CDNA FLJ35303 fis, clone PROST2009571
236067_at	0.858049	0.857003	0.610281	0.856656	MBNL2	AA453791	Transcribed locus
236094_at	0.971061	0.75616	0.443332	0.575045	TCF7L2	BF696202	Transcription factor 7-like 2 (T-cell specific, HMG-box)
236202_at	0.938693	0.649012	0.777085	0.676572		AW467480	Transcribed locus
236207_at	1.27127	1.1539	1.42161	1.02835	SSFA2	BE083088	Sperm specific antigen 2
236134_at	0.956138	0.982038	0.518841	0.698389	WDR68	AA769995	Transcribed locus
236149_at	1.02886	0.85906	0.560264	0.69377		AA502999	ng20b07.s1 NCI_CGAP_Ov2 Homo sapiens cDNA clone IMAGE:929941, mRNA sequence.
235554_x_at	1.04576	0.633253	0.904385	0.811337	MGC29898	BE048198	tz47c03.y1 NCI_CGAP_Brn52 Homo sapiens cDNA clone IMAGE:2291716 5' similar to contains Alu repetitive element;, mRNA sequence.
235547_at	1.07693	0.64346	0.659443	0.869875	PFAAP5	BG548427	602575012F1 NIH_MGC_77 Homo sapiens cDNA clone IMAGE:4703258 5', mRNA sequence.
235551_at	0.994211	0.812966	0.589489	0.592692	WDR4	AA555280	nk82e06.s1 NCI_CGAP_Sch1 Homo sapiens cDNA clone IMAGE:1020034 3' similar to contains Alu repetitive element;, mRNA sequence.
235603_at	0.959003	0.628064	0.575107	0.601335	HNRPU	N95466	Heterogeneous nuclear ribonucleoprotein U (scaffold attachment factor A)
235613_at	0.99043	1.05423	0.583394	1.33926	IQWD1	BF476152	Transcribed locus
235482_at	0.947984	0.961166	0.4992	0.690984	LOC400960	BE886868	Hypothetical gene supported by BC040598
235464_at	0.954823	0.756066	0.871815	0.610133	CSNK1A1	AA010757	Casein kinase 1, alpha 1
235466_s_at	1.07862	0.987582	0.639135	0.615401	DISP1	AI677948	Dispatched homolog 1 (Drosophila)
235516_at	1.00763	1.20476	1.20968	1.60066	SEPSECS	AI038867	Sep (O-phosphoserine) tRNA:Sec (selenocysteine) tRNA synthase
235515_at	0.925942	0.789711	0.656341	0.647641	C19orf46	AA827649	Chromosome 19 open reading frame 46
235493_at	0.901493	0.649602	0.457015	0.625069	NP220	AI927329	Transcribed locus
235509_at	1.00491	0.9722	0.772064	0.638838	C8orf38	AV662196	Chromosome 8 open reading frame 38
235783_at	0.950641	0.789273	0.697405	0.641788		BG107419	602277524F1 NIH_MGC_86 Homo sapiens cDNA clone IMAGE:4365532 5', mRNA sequence.
235736_at	0.909717	0.593819	0.684233	0.650411		BF000047	Homo sapiens, clone IMAGE:5167600, mRNA
235739_at	0.951267	1.11009	0.540995	0.783843	CSK	AA523939	Transcribed locus
235757_at	1.01934	0.815313	0.512088	0.739498	CDK6	AA814006	ob92h08.s1 NCI_CGAP_GCB1 Homo sapiens cDNA clone IMAGE:1338879 3', mRNA sequence.
235749_at	0.905371	0.557266	0.612757	0.483814	UGCGL2	AI057619	UDP-glucose ceramide glucosyltransferase-like 2
235822_at	0.93706	0.816417	0.726001	0.55353	COQ9	AW273049	Coenzyme Q9 homolog (S. cerevisiae)
235786_at	0.984019	0.757429	0.496471	0.566811	BCR	AI806781	Transcribed locus
236210_at	0.921345	0.779569	0.5431	0.528601	LILRB3	AW628575	hi41e02.x1 Soares_NFL_T_GBC_S1 Homo sapiens cDNA clone IMAGE:2974874 3', mRNA sequence.
235675_at	1.14303	0.494489	0.494611	0.476368	DHFRL1	AW104373	Dihydrofolate reductase-like 1
235644_at	1.03374	0.972705	0.689705	0.502012	FLJ32745	BF213953	601847423F1 NIH_MGC_55 Homo sapiens cDNA clone IMAGE:4078636 5', mRNA sequence.
235647_at	0.982795	0.771833	0.639988	0.503611	AP4S1	AI298279	Adaptor-related protein complex 4, sigma 1 subunit
235709_at	0.910791	0.574564	0.61406	0.709999	GAS2L3	H37811	Growth arrest-specific 2 like 3
235730_at	1.0691	0.750296	0.484415	0.644226		AA830545	CDNA FLJ34425 fis, clone HHDPC2008297
235690_at	0.796119	0.786195	0.598459	0.514849	ZNF594	AA872562	Zinc finger protein 594
237444_at	0.811393	0.860392	0.583568	0.650979		AI801902	Transcribed locus
237435_at	0.939628	0.744053	0.951986	1.62864		AI093492	Transcribed locus
237475_x_at	0.967948	0.745362	0.548084	0.606315		AI151104	qb48d05.x1 NCI_CGAP_Brn23 Homo sapiens cDNA clone IMAGE:1703337 3' similar to contains Alu repetitive element;, mRNA sequence.
237398_at	0.936276	0.777367	0.468401	0.567978	ARHGEF12	AA890487	ak12a07.s1 Soares_parathyroid_tumor_NbHPA Homo sapiens cDNA clone IMAGE:1405716 3' similar to contains element MER22 repetitive element ;, mRNA sequence.
237577_at	1.0197	0.699644	0.715057	0.619767	PCNP	BE465316	PEST proteolytic signal containing nuclear protein
237626_at	1.26826	1.4474	0.996332	1.77742	RB1CC1	AI801666	to93e05.x1 NCI_CGAP_Gas4 Homo sapiens cDNA clone IMAGE:2185856 3', mRNA sequence.
237671_at	1.16192	0.723373	0.385136	0.551478	RAD51L1	AW450288	Transcribed locus
237502_at	0.926311	0.749342	0.557713	0.557763	CRLS1	BE671045	Cardiolipin synthase 1
237483_at	1.00164	0.832298	0.44514	0.819323	PLEKHA5	AI990790	Transcribed locus
237563_s_at	1.06536	1.00173	0.721139	0.658236	LOC440731	AI286239	Hypothetical LOC440731
237741_at	0.97645	0.609216	0.96621	0.903731	SLC25A36	AW514168	Solute carrier family 25, member 36
237158_s_at	1.2207	1.34288	1.46009	1.19861	MPHOSPH9	AW449069	M-phase phosphoprotein 9
237110_at	0.925666	0.719797	0.574983	0.844648		BF445178	Transcribed locus
237118_at	0.959918	0.690627	0.633269	0.628713	MMP1	AA057437	zf57f11.s1 Soares retina N2b4HR Homo sapiens cDNA clone IMAGE:381069 3', mRNA sequence.
237183_at	0.781392	0.738296	0.727523	1.3379	GALNT5	AI023433	UDP-N-acetyl-alpha-D-galactosamine:polypeptide N-acetylgalactosaminyltransferase 5 (GalNAc-T5)
237064_x_at	0.971484	0.911991	0.518961	0.688696	LOC127602	AW593330	Transcribed locus
237287_at	0.913075	0.728111	0.644112	0.619868	WDR34	AW450386	WD repeat domain 34
237289_at	1.01923	0.636472	0.888748	0.809858	CREB1	AW593801	CDNA FLJ34215 fis, clone FCBBF3021985
237210_at	0.900492	0.880937	0.811061	0.536333	NFRKB	AI304853	Nuclear factor related to kappaB binding protein
237208_at	1.00097	0.893827	0.679328	0.553854	WDR61	AI074617	WD repeat domain 61
237239_at	0.965377	0.667161	0.548865	0.422965	CREBBP	AW183655	Transcribed locus
238058_at	1.09805	0.835264	0.689068	0.647019	FLJ27365	AA603041	FLJ27365 protein
238070_at	0.99968	0.835628	0.55687	0.603196	CHD1L	AA573217	Chromodomain helicase DNA binding protein 1-like
238055_at	0.968613	0.817678	0.576055	0.651977	ATP8B1	BG505277	Homo sapiens, clone IMAGE:4698842, mRNA
238043_at	0.982249	0.923405	0.633192	0.698529	ARID1B	AI913123	Transcribed locus
238142_at	0.899274	0.847082	0.628808	0.745257	KCTD13	AW029203	CDNA FLJ37584 fis, clone BRCOC2004950
238161_at	0.957388	0.95367	0.647996	0.872411	SCOTIN	AA813859	ny14f05.s1 NCI_CGAP_GCB1 Homo sapiens cDNA clone IMAGE:1271745 3', mRNA sequence.
238127_at	0.929445	0.628896	0.57101	0.533336	FLJ41484	AI479082	Hypothetical LOC650669
237864_at	1.01032	1.03335	0.514129	0.759544		AI990122	Transcribed locus
237868_x_at	0.933784	0.724328	0.644914	0.779106	NPHP4	AI791828	Transcribed locus
237943_at	1.03315	0.747804	0.626191	0.603813	TMCC1	AI820802	Transmembrane and coiled-coil domain family 1
237923_at	0.75655	0.647692	0.677191	0.446159	HLA-B	AI733801	Transcribed locus
237933_at	0.96164	0.661312	0.47035	0.718595	GRIN2B	AI475124	tm63f04.x1 NCI_CGAP_Brn25 Homo sapiens cDNA clone IMAGE:2162815 3', mRNA sequence.
237768_x_at	1.00804	0.757469	0.367125	0.579848		AA825925	od59g04.s1 NCI_CGAP_GCB1 Homo sapiens cDNA clone IMAGE:1372278 3' similar to contains Alu repetitive element;contains element MER37 repetitive element ;, mRNA sequence.
237817_at	0.938435	1.01251	0.815049	0.54368	SSR3	AI939474	Signal sequence receptor, gamma (translocon-associated protein gamma)
238000_at	1.01511	0.764768	0.644343	0.793566	EGLN1	BF195340	Transcribed locus
238001_at	0.874085	0.838172	0.690874	0.623839	KCTD6	BF693998	Potassium channel tetramerisation domain containing 6
236598_at	0.920203	0.939194	0.713347	0.497509	LOC643211	BF432065	CDNA FLJ14635 fis, clone NT2RP2001196
236545_at	0.908232	0.744618	0.409249	0.588017	PPP3CA	AA532718	Transcribed locus
236611_at	1.06844	0.899717	0.560451	0.534901	HN1	AW173312	CDNA FLJ31443 fis, clone NT2NE2000808
236607_at	0.947656	0.82355	0.651551	0.768224	FAM119A	AI921882	Transcribed locus
236619_at	0.984707	0.528483	0.783362	0.847298		AI922972	Transcribed locus
236621_at	0.973745	0.747179	0.672853	0.59247	PRKCA	AV683684	Transcribed locus
236402_at	0.952935	0.71562	0.822387	0.638413	BRAF	AW184034	CDNA FLJ42263 fis, clone TKIDN2014570
236451_at	0.945995	0.979156	0.695475	0.571215	LOC643211	AA825510	Transcribed locus
236428_at	0.962449	0.653923	0.537608	0.569116		D59900	Transcribed locus
236386_at	0.982187	0.565017	0.563513	0.673636		T78074	yd79e09.s1 Soares fetal liver spleen 1NFLS Homo sapiens cDNA clone IMAGE:114472 3', mRNA sequence.
236390_at	1.01378	0.700009	0.665639	0.479305	C20orf94	AW005530	Chromosome 20 open reading frame 94
236494_x_at	0.965618	0.647751	0.568711	0.723685	Gcom1	AW003845	CDNA clone IMAGE:5175565
236520_at	0.975222	1.01843	0.570148	0.999747	FKBP1A	AW972380	(clone 33) macronuclear mRNA
236524_at	1.03623	0.51842	0.691654	0.61821	TM2D1	AA737437	CDNA FLJ37319 fis, clone BRAMY2018027
236515_at	1.03623	0.879845	0.956578	0.599845	SAPS3	AI055865	Transcribed locus
236462_at	0.902722	0.710122	0.483923	0.630024	FLJ10201	AA742310	Transcribed locus
236487_at	1.05602	0.655159	0.998457	1.05796	SCLT1	AW513286	Sodium channel and clathrin linker 1
236489_at	1.18687	1.14662	0.999582	0.965579		AI282097	Transcribed locus
236484_at	1.02279	0.745955	0.659862	0.533302	STARD7	AW850611	Transcribed locus
236931_at	1.05169	1.07336	0.607909	0.88864	STIM1	AI808348	wf54g10.x1 Soares_NFL_T_GBC_S1 Homo sapiens cDNA clone IMAGE:2359458 3', mRNA sequence.
236924_at	0.982634	0.762989	0.493001	0.753579	GLMN	AA814383	Glomulin, FKBP associated protein
236946_at	0.963537	0.701202	0.492233	0.611073	GPR75	AI220134	G protein-coupled receptor 75
236907_at	1.06594	0.523279	0.54283	0.510916	HOXA9	AI760366	CDNA FLJ25706 fis, clone TST04817
236978_at	0.954267	0.598696	0.398112	0.522722	THRAP1	N51961	Transcribed locus
236957_at	0.955734	0.647739	0.755557	0.74448	CDCA2	AI248208	Cell division cycle associated 2
236963_at	0.991607	0.727116	0.442942	0.810991		AV700946	Transcribed locus
236966_at	0.883176	0.49521	0.458476	0.62076	TXNDC6	BF942281	Thioredoxin domain containing 6
236754_at	0.929074	0.614154	0.557316	0.69976		AI216567	qm42b01.x1 NCI_CGAP_Lu5 Homo sapiens cDNA clone IMAGE:1884457 3' similar to gb:L21934 STEROL O-ACYLTRANSFERASE (HUMAN);, mRNA sequence.
236525_at	0.964367	1.18008	1.50731	1.16951	FBXO36	BG479112	F-box protein 36
236700_at	0.987025	0.822844	0.517378	0.697346	EIF3S8	AI377875	te60e02.x1 Soares_NFL_T_GBC_S1 Homo sapiens cDNA clone IMAGE:2091098 3', mRNA sequence.
236831_at	1.2627	1.62698	1.35809	1.81537	CCDC50	AV683852	Coiled-coil domain containing 50
236850_at	0.867301	0.606671	0.711498	0.619438	CAPRIN1	BF515755	Cell cycle associated protein 1
236836_at	1.02845	0.924592	0.544289	0.780611	ITM2A	BE503070	CDNA FLJ46538 fis, clone THYMU3037827
236778_at	1.22943	0.727991	1.3207	1.51233	ATRX	AA826176	Transcribed locus
236813_at	0.968281	0.850786	0.895657	0.652191	C10orf83	N21659	Chromosome 10 open reading frame 83
244536_at	1.02886	0.984646	0.645831	0.714758	TP53BP2	AA702963	zi81a11.s1 Soares_fetal_liver_spleen_1NFLS_S1 Homo sapiens cDNA clone IMAGE:447164 3', mRNA sequence.
244663_at	1.03856	1.26616	1.26681	1.77712		AI675336	Transcribed locus
244674_at	0.911359	0.970577	0.606305	0.73555	DNAJB6	AA936428	Transcribed locus
244669_at	0.992386	0.719653	0.664927	0.577866	SNHG5	T16443	Small nucleolar RNA host gene (non-protein coding) 5
244633_at	0.997273	0.703284	0.500909	0.670379	PIAS2	AA404996	Transcribed locus
244631_at	0.883928	0.635327	0.605376	0.507606	LOC653071	AI765607	Transcribed locus
244347_at	0.986664	0.890836	0.592068	0.707636	C10orf61	BE825318	Transcribed locus
244268_x_at	1.12983	0.965842	0.843131	0.566749	PAK2	BF435769	Transcribed locus
244297_at	1.03456	0.964805	0.638695	1.13848	ANKRD18A	AI806762	Ankyrin repeat domain 18A
244443_at	0.989319	0.729106	0.613243	0.526013	CHD2	BE247450	Chromodomain helicase DNA binding protein 2
244476_at	0.906325	0.856043	0.593236	0.989876		R39769	yf58b03.s1 Soares infant brain 1NIB Homo sapiens cDNA clone IMAGE:26267 3', mRNA sequence.
244470_at	0.969112	0.622309	0.473192	0.618883	RNF12	BF063235	Ring finger protein 12
244383_at	0.915897	0.85071	0.559026	0.805039	Gcom1	AI283051	CDNA clone IMAGE:5175565
244418_at	1.08256	1.07202	0.654723	0.847402	RTN3	AA223929	Transcribed locus
32094_at	0.902711	0.862605	0.649975	0.783506	C6ST; C6ST1	AB017915	carbohydrate (chondroitin 6) sulfotransferase 3
32091_at	0.988308	0.902844	0.892305	0.60446	FLJ90431; KIAA0446; RP11-54H19.3	AB007915	solute carrier family 25, member 44
33494_at	0.990515	0.796427	0.617328	0.667517	MADD; ETFQO	S69232	electron-transferring-flavoprotein dehydrogenase
244766_at	1.01214	0.944684	0.606542	0.735223	LOC440354	BG180003	PI-3-kinase-related kinase SMG-1 pseudogene
244822_at	0.947067	0.700611	0.411194	0.652513	GART	AA811244	Phosphoribosylglycinamide formyltransferase, phosphoribosylglycinamide synthetase, phosphoribosylaminoimidazole synthetase
244826_at	0.991763	0.621704	0.607172	0.701675	PITPNB	R24061	Transcribed locus
244841_at	0.991608	0.598627	0.702358	0.632849	SEC24A	AI080364	SEC24 related gene family, member A (S. cerevisiae)
244786_at	0.970699	0.888552	0.736707	0.6422	SNHG10	AW972850	Small nucleolar RNA host gene (non-protein coding) 10
244791_at	0.951243	0.63263	0.450287	0.462018		AA835936	oc77e05.s1 NCI_CGAP_GCB1 Homo sapiens cDNA clone IMAGE:1355744 similar to contains MER30.t2 MER30 repetitive element ;, mRNA sequence.
244801_at	1.02502	1.02344	0.632757	0.716426	PSMB7	AI248671	Proteasome (prosome, macropain) subunit, beta type, 7
244803_at	0.985249	0.794718	0.66112	0.762531	DAP3	AI335191	Transcribed locus
243646_at	0.989696	0.709324	0.61277	0.778577	SCRN3	BE349511	ht57g05.x1 NCI_CGAP_Mel15 Homo sapiens cDNA clone IMAGE:3150872 3' similar to contains Alu repetitive element;contains element MER38 repetitive element ;, mRNA sequence.
243786_at	1.14326	1.54428	1.2096	1.28565	ZDHHC20	AA454190	Zinc finger, DHHC-type containing 20
243705_at	0.949566	0.505117	0.612144	0.640058	DDHD1	AW183689	Transcribed locus, strongly similar to NP_085140.1 domain containing 1 [Homo sapiens]
243527_at	0.996386	0.870801	0.564592	0.992595		AW793677	MR1-UM0008-200300-004-c02 UM0008 Homo sapiens cDNA, mRNA sequence.
243519_at	1.04466	0.891577	0.559352	0.844684	UBE3C	BF591310	Ubiquitin protein ligase E3C
243492_at	0.963154	0.82311	0.674673	0.564875	THEM4	AW972653	Thioesterase superfamily member 4
243484_x_at	0.909343	1.34353	1.51406	1.68021		AA404260	zv63h02.s1 Soares_total_fetus_Nb2HF8_9w Homo sapiens cDNA clone IMAGE:758355 3', mRNA sequence.
243489_at	1.2495	1.11197	1.39135	0.97609	LOC441032	BF514098	Transcribed locus
243490_at	0.978251	0.506032	0.484583	0.669421	CEP192	AW590540	hg37d03.x1 NCI_CGAP_GC6 Homo sapiens cDNA clone IMAGE:2947781 3', mRNA sequence.
243593_s_at	0.949728	0.684221	0.565152	0.53197	HNRPM	BF003018	Transcribed locus
243589_at	1.0638	1.02499	0.453438	0.642784	KIAA1267	AI823453	KIAA1267
243612_at	1.01734	0.865256	0.631096	0.848952	NSD1	AL526448	Nuclear receptor binding SET domain protein 1
243559_at	0.922464	0.535249	0.618874	0.613204	ZNF148	BF515306	Transcribed locus
244008_at	0.884324	0.548189	0.627024	0.877578		AW874263	Transcribed locus
244015_at	1.02629	0.868618	0.463103	0.775177	ABCC1	AA704163	zj77a08.s1 Soares_fetal_liver_spleen_1NFLS_S1 Homo sapiens cDNA clone IMAGE:460886 3' similar to contains MER18.t1 MER18 repetitive element ;, mRNA sequence.
244032_at	1.03946	0.828715	0.675593	0.582655		AA740675	Transcribed locus
244197_x_at	0.928392	0.779605	0.631643	0.859334		AI859990	wm22e03.x1 NCI_CGAP_Ut4 Homo sapiens cDNA clone IMAGE:2436700 3' similar to contains Alu repetitive element;, mRNA sequence.
244154_at	0.745583	0.525311	0.414557	0.628084	DDHD1	AI751130	CDNA FLJ34209 fis, clone FCBBF3020599
244139_s_at	0.87331	0.608137	0.629222	0.516578	PDCD6	AI435073	Transcribed locus
244165_at	0.967238	0.877027	0.616469	0.629178	C10orf18	AI809511	Chromosome 10 open reading frame 18
244185_at	1.01484	0.921567	0.649271	0.740383	METAP2	AA921841	om44c03.s1 Soares_NFL_T_GBC_S1 Homo sapiens cDNA clone IMAGE:1543876 3', mRNA sequence.
243907_at	1.29381	1.22778	1.8519	1.66721		AW117383	Transcribed locus
243827_at	0.929385	0.947668	0.558814	0.736117	ARSB	AL038125	Transcribed locus
243829_at	0.817027	0.769305	0.630095	0.588703	BRAF	AW613053	V-raf murine sarcoma viral oncogene homolog B1
243618_s_at	1.15018	0.971737	0.556709	0.835067	LOC152485	BF678830	602153135F1 NIH_MGC_83 Homo sapiens cDNA clone IMAGE:4294256 5', mRNA sequence.
243851_at	1.00616	0.927649	0.6258	1.01949	RAB3GAP2	AI860647	RAB3 GTPase activating protein subunit 2 (non-catalytic)
243835_at	1.02155	0.446044	0.581048	0.686811	ZDHHC21	BE467787	Zinc finger, DHHC-type containing 21
243992_at	0.920503	0.772568	0.664049	0.888929	ZMYM2	R61857	Transcribed locus
243993_at	0.752882	0.604865	0.435968	0.52769	CACNA1I	AA436887	zv59h03.s1 Soares_testis_NHT Homo sapiens cDNA clone IMAGE:757973 3', mRNA sequence.
243929_at	1.01001	1.02163	0.543833	0.881031	GPR116	H15261	ym30c11.s1 Soares infant brain 1NIB Homo sapiens cDNA clone IMAGE:49796 3', mRNA sequence.
243933_at	0.906941	0.825771	0.570906	0.756806	CAV2	AI096634	qb57c10.x1 NCI_CGAP_Brn23 Homo sapiens cDNA clone IMAGE:1704210 3', mRNA sequence.
56821_at	0.949741	0.697635	0.570727	0.696785	FLJ10815	AI963454	Amino acid transporter
57516_at	0.997327	0.84054	0.609308	0.601704	ZNF764	AA746290	Zinc finger protein 764
56919_at	1.20848	1.29246	1.54112	1.52424	WDR48	AI806628	WD repeat domain 48
57163_at	0.959485	0.886239	0.773804	0.634496	ELOVL1	H93026	Elongation of very long chain fatty acids (FEN1/Elo2, SUR4/Elo3, yeast)-like 1
57540_at	0.929592	0.868602	0.656399	0.841641	BRE	AI823980	Brain and reproductive organ-expressed (TNFRSF1A modulator)
89948_at	1.03918	0.976041	0.795235	0.59192	C20orf67	AI743331	Chromosome 20 open reading frame 67
81811_at	0.938092	0.958161	0.579469	0.773242	PDCD6	AI744451	Transcribed locus
91617_at	0.959011	0.847334	0.629346	0.491703	DGCR8	AI028241	DiGeorge syndrome critical region gene 8
AFFX-HUMRGE/M10098_5_at	0.811285	0.736872	1.00462	0.467375		AFFX-HUMRGE/M10098_5
64408_s_at	0.805591	0.796799	0.600834	0.596057	CALML4	AW025529	Calmodulin-like 4
64438_at	1.12674	1.50092	1.23745	1.36424	FLJ22222	W19668	Hypothetical protein FLJ22222
65585_at	1.00258	0.919453	0.596266	0.667012	MGC16279	AA527515	ng41h06.s1 NCI_CGAP_Co3 Homo sapiens cDNA clone IMAGE:937403 3', mRNA sequence.
65588_at	1.02616	0.886514	0.690664	0.600171	LOC388796	AA827892	Hypothetical LOC388796
37170_at	0.928025	0.550626	0.842597	0.564107	BIKE; HRIHFB2017; DKFZp434K0614; DKFZp434P0116	AB015331	BMP2 inducible kinase
37232_at	1.00701	0.654982	0.865787	0.870813	Talpid3	AB011158	KIAA0586
37793_r_at	1.01629	1.59063	1.44059	1.13233	Trad; R51H3; HsTRAD; RAD51D	AF034956	RAD51-like 3 (S. cerevisiae)
43544_at	1.04305	0.939263	0.727088	0.570211	THRAP5	AA314406	Thyroid hormone receptor associated protein 5
44065_at	0.98926	0.971934	0.811573	0.627941	C12orf52	AI937468	Chromosome 12 open reading frame 52
41113_at	0.83238	0.787901	0.635548	0.717621	ZNF500	AI871396	Zinc finger protein 500
41160_at	0.850227	0.793045	0.625307	0.575484	MBD3	AC005943
46947_at	1.01238	0.960121	0.679165	0.575955	GNL3L	T87245	Guanine nucleotide binding protein-like 3 (nucleolar)-like
46167_at	1.02625	0.914349	0.815446	0.661676	TTC4	W22690	71G4 Human retina cDNA Tsp509I-cleaved sublibrary Homo sapiens cDNA not directional, mRNA sequence.
38766_at	1.01606	1.57906	1.20057	1.14487	SRCAP; FLJ44499; KIAA0309	AB002307	Snf2-related CBP activator protein
39650_s_at	0.89084	0.628433	0.495166	0.793157	FLJ11383; KIAA0435	AB007895	pecanex-like 2 (Drosophila)
40189_at	1.02172	1.03787	0.817039	0.645122	2PP2A; IGAAD; I2PP2A; PHAPII; TAF-IBETA	M93651	SET translocation (myeloid leukemia-associated)
241970_at	0.895139	0.62613	0.560046	0.584838	KIF5C	C14898	C14898 Clontech human aorta polyA+ mRNA (#6572) Homo sapiens cDNA clone 098C12 3', mRNA sequence.
241965_at	0.981005	1.13619	0.590608	0.727314	KIAA0217	BF589232	Transcribed locus
241966_at	0.880526	0.669442	0.850773	0.661158	MYO5A	N67810	Transcribed locus
241937_s_at	0.905296	0.794105	0.72993	0.521161	WDR4	AA577678	nn22f08.s1 NCI_CGAP_Co12 Homo sapiens cDNA clone IMAGE:1084647 3' similar to contains Alu repetitive element;contains element MSR1 repetitive element ;, mRNA sequence.
241956_at	0.962477	0.725092	0.649082	0.755682	PCGF5	AI521883	ti80b03.x1 NCI_CGAP_Kid11 Homo sapiens cDNA clone IMAGE:2138285 3', mRNA sequence.
241959_at	0.909758	0.67396	0.6116	0.747074	ANAPC10	AW025455	Anaphase promoting complex subunit 10
241955_at	0.977699	0.669952	0.673944	0.579117	HECTD1	BE243270	HECT domain containing 1
242068_at	1.03237	0.835464	0.333442	0.601573	GK	AA608834	af03h05.s1 Soares_testis_NHT Homo sapiens cDNA clone IMAGE:1030617 3', mRNA sequence.
242041_at	0.970897	0.71956	0.647669	0.701707	CSPP1	AI933671	Centrosome and spindle pole associated protein 1
241825_at	0.93504	0.850186	0.737114	0.598486	FLJ37953	AI265967	Hypothetical protein FLJ37953
241865_at	0.974701	0.86771	0.526008	0.647771	GNB1	AI056689	Transcribed locus
241792_x_at	0.930478	0.797434	0.620764	0.659464	LUC7A	N36160	yy29e02.s1 Soares melanocyte 2NbHM Homo sapiens cDNA clone IMAGE:272666 3', mRNA sequence.
241798_at	0.991069	0.780226	0.503003	0.73497		AI339930	qn18c06.x1 NCI_CGAP_Lu5 Homo sapiens cDNA clone IMAGE:1898602 3' similar to contains Alu repetitive element;contains element THR THR repetitive element ;, mRNA sequence.
241786_at	1.02097	0.980398	0.592076	0.793242	CACNA1E	AI380514	Transcribed locus
241913_at	0.996875	0.749946	0.597094	0.686773	KLHL8	T40928	ya14d01.s1 Stratagene liver (#937224) Homo sapiens cDNA clone IMAGE:61441 3' similar to contains Alu repetitive element, mRNA sequence.
241903_at	0.967716	0.777384	0.520063	0.591452	TNFRSF25	AI688631	wd40a10.x1 Soares_NFL_T_GBC_S1 Homo sapiens cDNA clone IMAGE:2330586 3', mRNA sequence.
241887_at	1.12787	1.2648	1.34987	1.46731	C14orf159	AI370381	CDNA FLJ41537 fis, clone BRTHA2017985
242241_x_at	0.980298	0.685836	0.489583	0.709588		R66713	yi33f06.s1 Soares placenta Nb2HP Homo sapiens cDNA clone IMAGE:141059 3' similar to contains Alu repetitive element;contains L1 repetitive element ;, mRNA sequence.
242261_at	0.941522	0.669893	0.421729	0.686096	PAX5	AW470799	ha33e08.x1 NCI_CGAP_Kid12 Homo sapiens cDNA clone IMAGE:2875526 3' similar to contains Alu repetitive element;, mRNA sequence.
242225_at	1.00187	0.7788	0.580352	0.670187	MON2	AI569482	tn87f01.x1 NCI_CGAP_Ut2 Homo sapiens cDNA clone IMAGE:2176537 3', mRNA sequence.
242214_at	1.07104	0.867275	0.643177	0.695145	RPS27A	AU152194	Transcribed locus
242233_at	1.02536	0.848354	0.528039	1.04179	KIAA1219	AI739332	Transcribed locus
242239_at	1.03359	0.82875	0.532223	0.76703	NOPD1	AW970888	CDNA clone IMAGE:5314281
242313_at	0.851796	0.643351	0.807433	0.680917	LOC728730	BG284890	Hypothetical protein LOC728730
242279_at	0.932118	0.650948	0.572478	0.628292	HTATIP	R11494	yf28d10.s1 Soares fetal liver spleen 1NFLS Homo sapiens cDNA clone IMAGE:128179 3', mRNA sequence.
242126_at	0.902396	0.807285	0.674969	0.599957	SPSB1	T53962	Transcribed locus
242121_at	0.935571	0.865455	0.474129	0.626919		AW973232	CDNA clone IMAGE:4328048
242129_at	0.890697	0.785874	0.65649	0.700513	SIN3B	BF510861	SIN3 homolog B, transcription regulator (yeast)
242111_at	1.04881	0.985327	0.635885	0.839145	METTL3	AI859463	Methyltransferase like 3
242188_at	0.998095	0.818751	0.443722	0.521892	PTPRG	AI743332	wg91f08.x1 Soares_NSF_F8_9W_OT_PA_P_S1 Homo sapiens cDNA clone IMAGE:2372487 3' similar to contains Alu repetitive element;contains element MER22 repetitive element ;, mRNA sequence.
242201_at	0.992078	0.859663	0.646728	0.932104	PMS2L5	AI418253	Postmeiotic segregation increased 2-like 5
242194_at	0.924228	0.970246	0.548605	0.769906	CUL4A	W80462	Cullin 4A
242195_x_at	0.947837	0.737476	0.622246	0.845876	NUMBL	BE350811	Numb homolog (Drosophila)-like
242143_at	1.05967	1.0535	0.616393	0.873434		BE674964	Transcribed locus
242156_at	0.995229	0.807265	0.538938	0.623991	ALMS1	AA765841	oa25e07.s1 NCI_CGAP_GCB1 Homo sapiens cDNA clone IMAGE:1306020 3', mRNA sequence.
242149_at	0.936556	0.774887	0.660156	0.651214		R02709	CAMP-binding guanine nucleotide exchange factor IV (cAMP-GEFIV) mRNA, clone W15, partial sequence
241310_at	0.995179	0.79703	0.468934	1.21124		AI685841	Transcribed locus
241347_at	0.980454	0.654622	0.734362	0.722484	KIAA1618	AA936632	KIAA1618
241348_at	0.997723	1.30221	1.48442	1.55028	ZNF654	AI453452	Zinc finger protein 654
241321_at	1.02525	0.882518	0.748058	0.642839	ANKRD23	AI379751	tc41e07.x1 Soares_total_fetus_Nb2HF8_9w Homo sapiens cDNA clone IMAGE:2067204 3' similar to contains L1.t2 L1 repetitive element ;, mRNA sequence.
241268_x_at	0.997512	1.23389	0.342411	0.906188	SAMHD1	AI939447	tf15b11.x5 NCI_CGAP_Brn23 Homo sapiens cDNA clone IMAGE:2096253 3' similar to contains Alu repetitive element;contains element LTR6 repetitive element ;, mRNA sequence.
241387_at	0.988534	0.994962	0.545113	0.639923	PTK2	AW276701	Transcribed locus
241388_at	0.953972	0.885004	0.622531	0.831663	RAB33B	AL567118	AL567118 Homo sapiens FETAL BRAIN Homo sapiens cDNA clone CS0DF029YI01 3-PRIME, mRNA sequence.
241364_at	1.10247	1.64168	1.59657	1.41287	TMEM57	AA827805	Transmembrane protein 57
240727_s_at	0.952268	0.8019	0.629236	0.901615	RPESP	AI458328	Transcribed locus
240759_at	1.1086	1.33192	0.606768	0.987207	F11R	AW593931	hg31a08.x1 NCI_CGAP_GC6 Homo sapiens cDNA clone IMAGE:2947190 3', mRNA sequence.
240798_at	0.987289	0.807712	0.454594	0.608826		BE467916	hz75g08.x1 NCI_CGAP_Lu24 Homo sapiens cDNA clone IMAGE:3213854 3', mRNA sequence.
240625_at	1.08788	0.609475	0.435524	0.710725	LOC729026	AW511032	Hypothetical protein LOC729026
240600_at	0.944274	0.914616	0.6101	0.791288	AP3B1	AI342146	qt26d12.x1 Soares_pregnant_uterus_NbHPU Homo sapiens cDNA clone IMAGE:1949111 3', mRNA sequence.
241027_at	0.963696	0.67274	0.575622	0.582979	OPA1	BE858373	Optic atrophy 1 (autosomal dominant)
240846_at	0.924227	0.666679	0.327698	0.441309	DCOHM	BF223271	7q31e03.x1 NCI_CGAP_GC6 Homo sapiens cDNA clone IMAGE:3699940 3', mRNA sequence.
240829_at	0.905547	0.577228	0.569365	0.629923	PEX3	BF439431	nab64d11.x1 Soares_NSF_F8_9W_OT_PA_P_S1 Homo sapiens cDNA clone IMAGE:3272516 3' similar to contains element MER35 repetitive element ;, mRNA sequence.
241704_x_at	1.00659	0.688706	0.589077	0.826154	ZNF320	AI025436	Zinc finger protein 320
241679_at	0.94329	0.680805	0.490379	0.621629	AKAP12	AI672553	wb32f06.x1 NCI_CGAP_GC6 Homo sapiens cDNA clone IMAGE:2307395 3', mRNA sequence.
241680_at	1.03186	0.685214	0.625586	0.80568		BE535717	601060384F1 NIH_MGC_10 Homo sapiens cDNA clone IMAGE:3446853 5', mRNA sequence.
241692_at	0.956336	1.02738	0.606769	0.808587	PPM1A	AA868729	Transcribed locus
241751_at	0.964471	0.872936	0.606269	0.857898	OFD1	AW292752	Oral-facial-digital syndrome 1
241746_at	0.931812	1.18894	0.784245	0.6298	CUL7	AW081304	Cullin 7
241774_at	0.98348	0.602113	0.525352	1.02648	PSMA3	AW088363	Transcribed locus
241722_x_at	0.890603	0.769641	0.491615	0.639947		BF724558	Transcribed locus
241737_x_at	0.973947	0.835909	0.590693	0.600986		T89693	Transcribed locus
241741_at	1.00749	0.905022	0.61887	0.699253	CRLS1	AI339837	Cardiolipin synthase 1
241448_at	0.930542	0.727039	0.447035	0.531529		AI494500	Transcribed locus
241413_at	1.08204	0.962405	0.589581	0.769242	RNF111	W80457	zh50d03.s1 Soares_fetal_liver_spleen_1NFLS_S1 Homo sapiens cDNA clone IMAGE:415493 3', mRNA sequence.
241421_at	0.929721	0.724327	0.615512	1.07075		N92599	Transcribed locus
241425_at	0.982	0.904567	0.59223	0.701732	NUPL1	AA769986	Nucleoporin like 1
241595_at	0.87858	0.915731	0.520186	0.65977	PSMD13	BF223007	7q27d02.x1 NCI_CGAP_GC6 Homo sapiens cDNA clone IMAGE:3699506 3', mRNA sequence.
241472_at	1.01725	0.620333	0.582396	0.750986	ABHD2	N74444	Transcribed locus
242990_at	1.09747	0.985444	0.559511	0.879206		AL038704	DKFZp566K2146_s1 566 (synonym: hfkd2) Homo sapiens cDNA clone DKFZp566K2146 3', mRNA sequence.
242956_at	0.938621	0.865722	0.632472	0.756243	IDH1	AA564352	Isocitrate dehydrogenase 1 (NADP+), soluble
243031_at	0.950478	0.504772	0.561301	0.820573	RTN4	N90377	za15d04.r1 Soares fetal liver spleen 1NFLS Homo sapiens cDNA clone IMAGE:292615 5', mRNA sequence.
243003_at	1.04705	0.849115	0.481073	0.766806	CXCL12	AV702197	CDNA FLJ45369 fis, clone BRHIP3017325
243006_at	0.821086	0.568792	0.631084	0.86205	FYN	BG222258	CDNA FLJ30333 fis, clone BRACE2007262
243016_at	0.757436	0.813476	0.531559	0.506493	TYMS	AW271958	Transcribed locus
242865_at	1.02906	0.781303	0.559361	0.826367	HTATIP	AI332638	qq28c07.x1 Soares_NhHMPu_S1 Homo sapiens cDNA clone IMAGE:1933836 3', mRNA sequence.
242859_at	1.09463	1.0579	0.428975	0.606593	TFCP2	BE156563	QV0-HT0368-090200-099-f02 HT0368 Homo sapiens cDNA, mRNA sequence.
242839_at	1.0539	0.926256	0.555704	0.609944	MDN1	AA605145	Transcribed locus
242837_at	1.02072	0.936539	0.62911	0.646621	SFRS4	AI435248	Splicing factor, arginine/serine-rich 4
242853_at	0.965195	0.835967	0.605339	0.68129		C18965	C18965 Human placenta cDNA (TFujiwara) Homo sapiens cDNA clone 570F03 5', mRNA sequence.
242903_at	0.884408	0.566181	0.733016	0.932122	IFNGR1	AI458949	Interferon gamma receptor 1
242905_at	0.974336	0.602232	0.630991	0.597738	PNO1	AV733347	Partner of NOB1 homolog (S. cerevisiae)
242920_at	1.05957	0.882953	0.657664	0.813041	PRKCA	AW590838	hg50b04.x1 NCI_CGAP_GC6 Homo sapiens cDNA clone IMAGE:2949007 3', mRNA sequence.
242887_at	1.00754	0.589699	0.694841	0.655359	KCMF1	AI221300	Transcribed locus
243319_at	0.903933	0.771283	0.699351	0.629168	MED31	AI274981	Mediator of RNA polymerase II transcription, subunit 31 homolog (S. cerevisiae)
243315_at	1.00051	0.872201	0.606485	0.700569	CEP192	AW022267	Transcribed locus
243295_at	1.00935	0.776701	0.825722	0.610941	RBM27	N75450	RNA binding motif protein 27
243280_at	0.927928	0.734015	0.62469	0.789956	MAPK8	AW444619	MRNA; cDNA DKFZp686J19109 (from clone DKFZp686J19109)
243284_at	0.965836	0.805641	0.632763	0.647486	FLJ11506	AW272170	Hypothetical protein FLJ11506
243286_at	0.885327	0.90628	0.483247	0.619535	CDK6	AA682674	Transcribed locus
243304_at	1	0.932273	0.595427	0.680071	LOC286109	AI733824	Hypothetical protein LOC286109
243462_s_at	0.978852	0.732477	0.429616	0.749644	BTBD3	BF590303	Transcribed locus
243444_at	1.01336	0.815965	0.685263	0.614811	RNF41	AI221894	Transcribed locus
243410_at	1.05581	0.731541	0.51357	0.639684	PTPN2	AI340002	Transcribed locus
243416_at	0.915909	0.855624	0.563114	0.93696	CACHD1	W23691	zc70b07.s1 Soares_fetal_heart_NbHH19W Homo sapiens cDNA clone IMAGE:327637 3', mRNA sequence.
243149_at	1.06052	0.926104	0.506929	0.712999	ABCC1	AI467945	Transcribed locus
243158_at	1.01558	1.04181	0.584745	0.877271	NT5C2	AV700081	AV700081 GKC Homo sapiens cDNA clone GKCFED12 3', mRNA sequence.
243088_at	1.04012	0.869474	0.474668	0.697198	KRIT1	W84667	zh52f06.s1 Soares_fetal_liver_spleen_1NFLS_S1 Homo sapiens cDNA clone IMAGE:415715 3', mRNA sequence.
243093_at	1.16751	1.61081	1.55103	1.11075	C2orf49	AV683529	Chromosome 2 open reading frame 49
243236_at	1.02676	0.482218	0.489679	0.523478	UBXD5	AA807545	ob92e03.s1 NCI_CGAP_GCB1 Homo sapiens cDNA clone IMAGE:1338844 3', mRNA sequence.
243256_at	0.934455	0.778617	0.573049	0.736702	MKNK1	AW796364	MAP kinase interacting serine/threonine kinase 1
243249_at	0.736584	0.736252	0.462575	0.536581		AL040360	DKFZp434O0813_s1 434 (synonym: htes3) Homo sapiens cDNA clone DKFZp434O0813 3', mRNA sequence.
243184_at	0.819401	0.885276	0.511974	0.847839	TJP1	AW173166	xj84b11.x1 Soares_NFL_T_GBC_S1 Homo sapiens cDNA clone IMAGE:2663901 3', mRNA sequence.
243206_at	1.01581	0.845928	0.507027	0.526117	LOC90799	BE082914	Transcribed locus
242480_at	1.18048	0.583473	0.630578	0.540924	MYST3	AA868356	Transcribed locus
242492_at	0.959756	0.672974	0.626449	0.623979	CLNS1A	AA412065	Chloride channel, nucleotide-sensitive, 1A
242457_at	0.981559	0.610801	0.414011	0.685193	PAM	AW451107	Transcribed locus
242453_at	1.01452	0.958915	0.600863	0.833863	C20orf72	AA524020	Transcribed locus
242475_at	0.963268	0.790338	0.970219	0.551732	TMEM140	BF685182	Transmembrane protein 140
242471_at	1.00487	0.969668	0.661209	0.922751	LOC647135	AI916641	Clone HLS_IMAGE_238756 mRNA sequence
242558_at	0.985385	0.770971	0.644385	0.622066	CTNNB1	AW362945	CDNA FLJ45490 fis, clone BRTHA2005831
242585_at	1.00351	0.807939	0.595824	0.671626	CKMT2	BG253162	CDNA FLJ35141 fis, clone PLACE6009527
242555_at	0.931974	0.576776	0.835842	0.47662	LOC388272	AW578854	Similar to RIKEN cDNA 4921524J17
242361_at	0.963722	1.06442	0.444427	0.848043	IMMT	T87111	Inner membrane protein, mitochondrial (mitofilin)
242362_at	0.991857	0.975529	0.661011	0.884694	CUL3	AI797788	wh78b11.x1 NCI_CGAP_CLL1 Homo sapiens cDNA clone IMAGE:2386845 3', mRNA sequence.
242374_at	1.071	0.603639	0.801582	1.04013	CD47	AA747563	Transcribed locus
242369_x_at	1.01405	0.70065	0.613565	0.591232	NCOA2	AI561070	MRNA; cDNA DKFZp313O038 (from clone DKFZp313O038)
242337_at	0.93392	0.830547	0.550426	0.625471	PAIP2	AI347128	tc04a02.x1 NCI_CGAP_Co16 Homo sapiens cDNA clone IMAGE:2062826 3', mRNA sequence.
242352_at	0.883437	0.631799	0.805128	0.526051	NIPBL	AW272262	Nipped-B homolog (Drosophila)
242343_x_at	1.07423	0.743507	0.585843	0.747374	UBE4A	H57111	yr09e12.s1 Soares fetal liver spleen 1NFLS Homo sapiens cDNA clone IMAGE:204814 3', mRNA sequence.
242440_at	1.05941	0.815331	0.528459	0.753449	VWF	N52821	yv31d11.s1 Soares fetal liver spleen 1NFLS Homo sapiens cDNA clone IMAGE:244341 3' similar to contains Alu repetitive element;contains element LTR1 repetitive element ;, mRNA sequence.
242446_at	0.88146	0.715226	0.486867	0.634978	C6orf163	AI033106	Chromosome 6 open reading frame 163
242439_s_at	0.962926	0.860756	0.67451	0.625322	ASXL1	AI819150	Additional sex combs like 1 (Drosophila)
242398_x_at	1.28358	1.34413	2.24251	1.8158	DCTN2	AA605121	no71b11.s1 NCI_CGAP_AA1 Homo sapiens cDNA clone IMAGE:1112253 3' similar to contains Alu repetitive element;, mRNA sequence.
242403_at	1.00912	0.844695	0.608967	0.744607		AI459177	Transcribed locus
242389_at	0.970376	0.840507	0.529663	0.629925	LUC7A	BE887449	CDNA FLJ33355 fis, clone BRACE2005151
242774_at	0.917424	0.602965	0.926745	0.712282	SYNE2	AI684761	Spectrin repeat containing, nuclear envelope 2
242738_s_at	0.90819	0.647189	0.671239	0.806347	ATBF1	BG402859	602418552F1 NIH_MGC_93 Homo sapiens cDNA clone IMAGE:4525500 5', mRNA sequence.
242807_at	1.0082	1.34318	1.49483	1.06727	FSD1L	AI970348	Fibronectin type III and SPRY domain containing 1-like
242803_at	0.937172	0.540754	0.438088	0.587615	CRIM1	AA642418	ns27c06.s1 NCI_CGAP_GCB1 Homo sapiens cDNA clone IMAGE:1184842 3', mRNA sequence.
242826_at	0.899343	0.891448	0.723282	0.662628		AA687479	Transcribed locus
242797_x_at	1.05445	0.703766	0.503651	0.783654	VPS16	AA629668	ad48d12.s1 Stratagene lung carcinoma 937218 Homo sapiens cDNA clone IMAGE:884951 3' similar to contains Alu repetitive element;, mRNA sequence.
242786_at	0.8655	0.766359	0.642712	0.784343	LOC283104	AI521166	Full-length cDNA clone CS0DK010YC18 of HeLa cells Cot 25-normalized of Homo sapiens (human)
242602_x_at	0.987794	0.873253	0.60374	0.585153	ZNF254	AW051899	Zinc finger protein 254
242448_at	0.915851	0.856979	0.436254	0.777803	MAP4K3	AI800895	CDNA FLJ33367 fis, clone BRACE2005661
242592_at	1.01034	1.18876	1.1475	1.50544	GPR137C	AV727446	G protein-coupled receptor 137C
242688_at	0.925824	0.747143	0.428909	0.626183	CDON	AI149880	Transcribed locus
242691_at	1.05001	0.925359	0.628519	0.747835		AA829017	od77e02.s1 NCI_CGAP_Ov2 Homo sapiens cDNA clone IMAGE:1373978 similar to contains Alu repetitive element;contains element L1 repetitive element ;, mRNA sequence.
242673_at	0.946534	0.779818	0.509975	0.676882	UBE3C	AA931284	oo05b06.s1 Soares_NFL_T_GBC_S1 Homo sapiens cDNA clone IMAGE:1565267 3' similar to gb:M81181 SODIUM/POTASSIUM-TRANSPORTING ATPASE BETA-2 (HUMAN);, mRNA sequence.
242705_x_at	0.992574	0.962597	0.669913	0.650821	LRPAP1	AI188104	Full length insert cDNA clone YT86E01
242656_at	0.900578	0.837693	0.824862	0.599224	GTF2H1	AI377688	General transcription factor IIH, polypeptide 1, 62kDa
242710_at	0.969889	0.700057	0.563379	0.59991	RSNL2	AI791820	Transcribed locus
229307_at	0.757787	0.566176	0.586194	0.385866	ANKRD28	N32051	Ankyrin repeat domain 28
229303_at	0.957728	0.781232	0.655308	0.734587	SF3B1	AI018793	Transcribed locus
229272_at	0.983537	0.921816	0.631833	0.73369	FNBP4	AI083506	Formin binding protein 4
229267_at	1.04848	0.884416	0.875657	0.60429	ANAPC1	AW205749	Clone HLS_IMAGE_1534603 mRNA sequence
229285_at	1.05867	1.58775	1.43649	1.45942	RNASEL	AI669749	Ribonuclease L (2',5'-oligoisoadenylate synthetase-dependent)
229356_x_at	0.951743	0.781071	0.762751	0.639183	INO80	AK002176	INO80 complex homolog 1 (S. cerevisiae)
229193_at	0.961703	0.731305	0.60274	0.64858	LUC7A	AA005430	CDNA FLJ33355 fis, clone BRACE2005151
229182_at	0.894617	0.913709	0.678964	0.50553	MGC45714	H97168	Full-length cDNA clone CS0DI067YF23 of Placenta Cot 25-normalized of Homo sapiens (human)
229246_at	1.06531	1.00199	0.599097	0.902939	SFRS1	AI803504	Transcribed locus, strongly similar to XP_933585.1 hypothetical protein XP_933585 [Homo sapiens]
229221_at	0.791703	0.612327	0.569219	0.541669	CD44	BE467023	CD44 molecule (Indian blood group)
229497_at	0.983685	0.749312	0.578916	0.802456	ANKDD1A	AI760630	Ankyrin repeat and death domain containing 1A
229506_at	1.21626	1.22243	1.48856	1.51992		BF114646	CDNA clone IMAGE:5263177
229468_at	1.01213	0.619473	0.72311	0.646496	CDK3	AI885421	Cyclin-dependent kinase 3
229466_at	0.937427	0.778675	0.503555	0.883648	LOC256273	AU144187	Hypothetical protein LOC256273
229470_at	0.914042	0.868275	0.561024	0.759176	FAM105B	AW451634	Family with sequence similarity 105, member B
229540_at	0.979133	0.712885	0.485583	0.693307	RBPJ	R45471	Recombination signal binding protein for immunoglobulin kappa J region
229558_at	0.954332	0.851518	0.782508	0.663353	MGC16824	AI927643	Transcribed locus
229517_at	1.09501	1.32466	1.31911	1.55656	PTPDC1	BE046919	Protein tyrosine phosphatase domain containing 1
229513_at	0.961644	0.790139	0.612809	0.741457	STRBP	AK025613	Spermatid perinuclear RNA binding protein
229514_at	0.950627	0.676972	0.54218	0.860507	FLJ10033; FLJ20689; MGC61896	AB032978	chromosome 14 open reading frame 118
229520_s_at	1.03307	0.700548	0.601844	0.654807	C14orf118	BF060678	Chromosome 14 open reading frame 118
229399_at	1.00324	0.700242	1.26021	0.992019	C10orf118	BF438440	Chromosome 10 open reading frame 118
229436_x_at	1.0036	0.704686	0.607378	0.690966	BRCC3	AI672084	BRCA1/BRCA2-containing complex, subunit 3
229434_at	0.968211	0.827042	0.545359	0.663473	HNRPD	AA865357	Transcribed locus
229455_at	0.915637	0.603271	0.652414	0.625983		AW137073	Full length insert cDNA clone YZ04E02
229428_at	0.994592	1.0576	0.791207	0.659235	PARG	AI400463	Poly (ADP-ribose) glycohydrolase
229422_at	1.01046	0.761313	0.631933	0.983165	NRD1	AA448346	Nardilysin (N-arginine dibasic convertase)
228916_at	0.936717	0.64494	0.873989	0.857489	CWF19L2	BE857467	CWF19-like 2, cell cycle control (S. pombe)
228909_at	1.0037	0.638611	0.737707	0.756478	C21orf86	AW131553	xf31c12.x1 NCI_CGAP_Brn50 Homo sapiens cDNA clone IMAGE:2619670 3', mRNA sequence.
228930_at	1.02939	0.84816	0.639235	0.58866	SCARNA15	AI679611	Small Cajal body-specific RNA 15
228933_at	0.990058	0.806641	1.29851	1.50108	NHS	BF111819	Nance-Horan syndrome (congenital cataracts and dental anomalies)
228951_at	0.962381	0.791108	0.571704	0.754727	FLJ10815	AI631572	Transcribed locus
228857_at	0.864783	0.74523	0.685003	0.621403	LOC285831	AA775731	Hypothetical protein LOC285831
228866_at	0.920314	0.756836	0.54208	0.506547	SMAD2	BF514864	CDNA FLJ13825 fis, clone THYRO1000558
228829_at	0.947711	0.985272	0.739905	0.567279	ATF7	AI279868	Activating transcription factor 7
228830_s_at	1.10817	1.12766	0.7329	0.61518	ATF7	AI279868	Activating transcription factor 7
228852_at	0.968326	0.96986	0.808482	0.661192	ENSA	AV726322	Endosulfine alpha
229092_at	1.37665	1.31357	1.25586	1.06086	TRPC4	AI420144	Full length insert cDNA clone YX37E06
229099_at	1.00565	1.0872	0.596653	0.51964	LOC790955	AW051379	Hypothetical protein LOC790955
229086_at	0.940504	0.86448	0.788223	0.631866	C1orf213	AW298597	Chromosome 1 open reading frame 213
229076_s_at	0.953259	0.931557	0.92426	0.601042	TOMM22	AI808192	Translocase of outer mitochondrial membrane 22 homolog (yeast)
229140_at	0.9866	1.06586	0.706652	0.595758	ZNF579	AI689676	Zinc finger protein 579
229155_at	1.03345	0.93843	0.728973	0.60085		BF508891	MRNA; cDNA DKFZp761F1212 (from clone DKFZp761F1212)
229119_s_at	0.944146	0.808939	0.56732	0.581486	ZSWIM7	BG108034	Zinc finger, SWIM-type containing 7
229111_at	1.12035	0.880778	0.644921	0.586808	MASP2	AA033699	Transcribed locus
229129_at	0.974279	0.874441	0.715875	0.657864	HNRPD	AI948456	Transcribed locus
228999_at	1.04348	0.536587	0.538974	0.53399	CHD2	AW514564	Chromodomain helicase DNA binding protein 2
229050_s_at	0.896407	0.902943	0.709604	0.562732	SNHG7	AL533103	Small nucleolar RNA host gene (non-protein coding) 7
230097_at	0.922243	0.802025	0.60623	0.637051	GART	AI207338	Phosphoribosylglycinamide formyltransferase, phosphoribosylglycinamide synthetase, phosphoribosylaminoimidazole synthetase
230104_s_at	1.23798	1.70902	1.43288	2.034	p25	BG055052	Transcribed locus
230064_at	0.864578	0.482079	0.576631	0.481035		AW296421	Transcribed locus
230082_at	0.991051	1.03177	0.674014	0.588503	LRRFIP2	AW137053	Transcribed locus, moderately similar to XP_001085096.1 similar to NEDD8-conjugating enzyme [Macaca mulatta]
230151_at	1.33292	1.6863	1.44476	1.25571	C13orf1	AW009330	Chromosome 13 open reading frame 1
230143_at	0.877378	0.869636	0.838196	0.599026	RNF165	BF433220	Ring finger protein 165
230127_at	1.03236	0.874453	0.6198	1.07387		AW044663	Transcribed locus
230134_s_at	1.32995	1.68441	1.59251	1.06553	MNAB	BF972355	CDNA clone IMAGE:4329353
230130_at	1.22688	1.47195	1.64413	1.72336	SLIT2	AI692523	Slit homolog 2 (Drosophila)
230133_at	1.00887	0.833601	0.718387	0.570749	MNAB	BF972355	CDNA clone IMAGE:4329353
230009_at	0.939322	0.783124	0.697739	0.660533	FAM118B	AI936072	Family with sequence similarity 118, member B
229969_at	0.962363	0.821428	0.602204	1.06561		AV723931	AV723931 HTB Homo sapiens cDNA clone HTBAQD04 5', mRNA sequence.
230060_at	0.849615	0.662402	0.618917	0.787519	CDCA7	AI277642	Cell division cycle associated 7
230026_at	0.897539	1.02338	0.811667	0.604508	MRPL43	N74662	Mitochondrial ribosomal protein L43
230033_at	0.947184	0.933937	0.81924	0.638999	C19orf51	BF436398	Chromosome 19 open reading frame 51
230330_at	1.11277	1.6778	1.81096	1.70455	PPM1D	AI312083	CDNA FLJ30011 fis, clone 3NB692000276
230285_at	0.881691	0.805667	0.75004	0.618743	DKFZp313A2432	BF447829	Hypothetical protein DKFZp313A2432
230302_at	0.98046	0.597557	0.801494	0.89811		AI741597	Full length insert cDNA clone ZD68B12
230292_at	0.91681	0.713143	0.573573	0.684692	RCBTB2	AA868809	CDNA FLJ25310 fis, clone SYN00991
230392_at	0.916951	0.695206	0.647538	0.575153	HNRPM	AW298141	CDNA FLJ31096 fis, clone IMR321000207
230336_at	0.933013	0.580587	0.670938	0.743001	C2orf27	AW665278	Transcribed locus
230352_at	1.11237	1.00632	1.89009	1.54769	PRPS2	AI392908	Phosphoribosyl pyrophosphate synthetase 2
230183_at	1.06682	0.805779	0.61625	0.853743		AW189467	Transcribed locus
230205_at	1.00736	0.816885	0.649158	0.606039	ZNF561	BF437602	Zinc finger protein 561
230200_at	0.927575	0.86802	0.533681	0.747803	NSUN6	BF433689	NOL1/NOP2/Sun domain family, member 6
230168_at	0.95357	0.911926	0.592669	0.650397		AI080614	Transcribed locus
230179_at	1.03218	1.3077	1.3858	1.83738	LOC285812	N52572	Hypothetical protein LOC285812
230180_at	0.874276	0.554222	0.750255	0.65405	DDX17	AA521056	aa71e05.s1 NCI_CGAP_GCB1 Homo sapiens cDNA clone IMAGE:826400 3', mRNA sequence.
230256_at	1.05768	0.786877	0.567876	0.82141	C1orf104	AW009436	Chromosome 1 open reading frame 104
230207_s_at	0.836663	0.654352	0.549749	0.697433	DOCK5	AI692645	Dedicator of cytokinesis 5
230243_at	0.953079	0.685529	0.730955	0.560902	RG9MTD2	BE671949	7a46g12.x1 NCI_CGAP_GC6 Homo sapiens cDNA clone IMAGE:3221830 3' similar to contains MER15.b2 MER15 repetitive element ;, mRNA sequence.
229694_at	0.921846	0.73119	0.598562	0.798122	BRWD2	BF062828	Bromodomain and WD repeat domain containing 2
229713_at	0.761165	0.847036	0.68548	0.535124	PIP5K2A	AW665227	Phosphatidylinositol-4-phosphate 5-kinase, type II, alpha
229704_at	0.963228	0.655832	1.14154	0.689299	APRIN	BF111072	Transcribed locus
229671_s_at	0.938943	0.974152	0.833178	0.661973	C21orf45	N93774	Chromosome 21 open reading frame 45
229754_at	0.933384	0.77181	0.592015	0.733842		AW104619	CDNA clone IMAGE:4862812
229610_at	0.994752	0.632746	0.756132	0.842273	CKAP2L	AW088063	Cytoskeleton associated protein 2-like
229571_at	0.957254	0.781668	0.59522	0.813092	CALM2	AV763524	Transcribed locus
229579_s_at	0.94042	0.584043	0.664043	0.718326	DISPB; HsT16908; KIAA1742; DKFZp547N223	AB051529	dispatched homolog 2 (Drosophila)
229640_x_at	0.967274	0.901208	0.69182	0.604555	C6orf68	AW439242	CDNA FLJ26856 fis, clone PRS08123
229642_at	1.04675	0.997815	0.559031	0.710149	ARHGEF7	AW139757	Rho guanine nucleotide exchange factor (GEF) 7
229886_at	0.974976	0.611683	0.796667	0.729576	C5orf34	AA502768	Chromosome 5 open reading frame 34
229888_at	0.958542	0.775273	0.614947	0.741927	C12orf60	AA861435	Chromosome 12 open reading frame 60
229899_s_at	1.00796	0.732865	0.542392	0.537075	C20orf199	AI625235	Chromosome 20 open reading frame 199
229966_at	1.05165	0.780861	0.587549	0.722601	EWSR1	AW089574	Ewing sarcoma breakpoint region 1
229907_at	1.15999	1.41119	1.32084	0.869874	SLC18A2	AW058634	Homo sapiens, clone IMAGE:6176018, mRNA
229787_s_at	1.07889	0.843386	0.896949	0.611011	OGT	AI742039	O-linked N-acetylglucosamine (GlcNAc) transferase (UDP-N-acetylglucosamine:polypeptide-N-acetylglucosaminyl transferase)
229790_at	1.01641	0.855831	0.717974	0.626973	TERF2	AW006832	Telomeric repeat binding factor 2
229852_at	1.05605	0.586833	0.878973	0.689399	NMNAT1	AW779092	ho48e01.x1 Soares_NFL_T_GBC_S1 Homo sapiens cDNA clone IMAGE:3040632 3', mRNA sequence.
229858_at	0.874829	0.67219	0.449456	0.51131	ANKRD17	AU146893	CDNA FLJ12024 fis, clone HEMBB1001797
229850_at	1.09761	0.97108	1.2614	1.60787		N30152	Full length insert cDNA clone YX81F03
229826_at	1.02625	0.975663	0.725776	0.622416	SNHG8	BF573638	Small nucleolar RNA host gene (non-protein coding) 8
227935_s_at	0.971959	0.8825	0.739242	0.580016	PCGF5	AA522681	Polycomb group ring finger 5
227920_at	1.01404	0.895135	0.796963	0.586377	KIAA1553	AV700885	KIAA1553
227954_at	0.899119	0.674687	0.732737	0.569309	LOC162073	AI458417	Hypothetical protein LOC162073
227960_s_at	0.977093	0.856886	0.737009	0.638477	HAGH	AW070436	Hydroxyacylglutathione hydrolase
227859_at	0.994541	0.620037	0.768203	1.00234	RBJ	AV706343	Ras-associated protein Rap1
227852_at	0.923984	0.778803	0.615078	0.612262	RP9	BF438270	Retinitis pigmentosa 9 (autosomal dominant)
227853_at	0.90041	0.846643	0.62857	0.859355		AW024350	Transcribed locus
227854_at	1.02577	0.636491	0.605648	0.800252	FANCL	BE620258	Transcribed locus
227887_at	0.985211	0.781012	0.723209	0.570621	LOC400236	AW138940	Hypothetical LOC400236
227880_s_at	0.978911	0.93712	0.810962	0.574481	TMEM185A	AW300965	Transmembrane protein 185A
227896_at	1.04363	0.994497	0.632628	0.523995	BCCIP	AI373643	BRCA2 and CDKN1A interacting protein
227891_s_at	1.0637	0.978862	0.530361	0.642907	GGT1	AU144462	Transcribed locus
228087_at	1.05979	1.32652	1.42215	1.68341	FLJ23031; MGC104248	AK026684	coiled-coil domain containing 126
228090_at	1.0193	0.818935	0.591889	0.699083	NMNAT3	AW249913	Nicotinamide nucleotide adenylyltransferase 3
228051_at	1.01129	1.01798	1.08311	1.49197	LOC202451	AI979261	Hypothetical protein LOC202451
228095_at	1.00597	0.732793	0.546187	0.62119	PHF14	AA608749	PHD finger protein 14
228115_at	1.07818	0.887446	1.23294	1.67209		AW299905	Full length insert cDNA clone ZE05E03
228002_at	1.01518	1.06574	0.719249	0.643198	IDI2	AI814569	Isopentenyl-diphosphate delta isomerase 2
227993_at	1.00597	0.832366	0.747595	0.550361	METAP2	AW003997	Methionyl aminopeptidase 2
228031_at	0.914971	0.856072	0.608368	0.79444	C20orf121	AW444778	Chromosome 20 open reading frame 121
228045_at	1.08315	0.758642	0.652409	0.66754	SUGT1	BF438106	MRNA; cDNA DKFZp451K063 (from clone DKFZp451K063)
227679_at	1.06017	1.27763	0.538051	1.02211	HDAC11	BE219277	Transcribed locus
227653_at	0.998954	0.860801	0.720693	0.663658	TRMT5	AI168767	TRM5 tRNA methyltransferase 5 homolog (S. cerevisiae)
227672_at	0.966037	1.022	0.620826	0.782378	C8orf73	W67308	Chromosome 8 open reading frame 73
227668_at	0.937376	1.00152	0.806828	0.614986	C17orf56	AA552953	Chromosome 17 open reading frame 56
227565_at	0.839179	0.694789	0.680077	0.628134		BE501881	Transcribed locus
227577_at	0.997586	0.596773	0.688025	0.736429	EXOC8	AI168350	Transcribed locus
227575_s_at	0.944751	0.758488	0.637678	0.663043	C14orf102	AI653729	Chromosome 14 open reading frame 102
227576_at	0.945933	0.895404	0.404907	0.736135		AW003140	CDNA FLJ42015 fis, clone SPLEN2032813
227559_at	0.929704	0.740316	0.677823	0.646593		AL521129	Transcribed locus
227593_at	0.933316	0.703271	0.665852	0.641297		AW964477	EST376550 MAGE resequences, MAGH Homo sapiens cDNA, mRNA sequence.
227587_at	0.934444	0.746415	0.639745	0.739832	FLJ12949	N46431	Hypothetical protein FLJ12949
227792_at	0.893948	0.839144	0.5894	0.675611	LOC162073	AA490685	Hypothetical protein LOC162073
227765_at	0.971082	0.752995	0.637981	0.56534	CCDC112	BF002908	CDNA clone IMAGE:4820809
227777_at	0.873989	0.666631	0.468256	0.46057	FLJ20360	BF223040	Transcribed locus
227768_at	0.92253	0.880164	0.77108	0.585518	FLJ13839; FLJ20307; KIAA1703	AB051490	zinc finger protein 407
227815_at	1.00938	0.933122	0.853261	0.595329	VPS33A	W60691	Transcribed locus
227805_at	1.06387	0.936338	0.737376	0.622252	MAP1D	AA779679	Transcribed locus
227720_at	0.915176	0.879603	0.639516	0.886528	FLJ25555	AI916719	ts80f10.x1 NCI_CGAP_GC6 Homo sapiens cDNA clone IMAGE:2237611 3', mRNA sequence.
227718_at	0.933973	0.942209	0.771186	0.579606	PURB	BF337790	Purine-rich element binding protein B
227694_at	1.14326	1.52029	1.60138	1.77412	C1orf201	AI916378	Chromosome 1 open reading frame 201
227703_s_at	1.01016	0.967281	0.72119	1.42595	SYTL4	AL391688
227740_at	1.02047	0.715062	0.762647	0.578871	UHMK1	AW173222	U2AF homology motif (UHM) kinase 1
228571_at	0.956037	0.679893	0.752377	0.660053	RBAK	BE963438	RB-associated KRAB zinc finger
228566_at	0.992942	0.952268	0.653095	0.814889	P15RS	AA778694	Hypothetical protein FLJ10656
228542_at	0.957572	0.80682	0.641799	0.767545	MRS2L	AI631209	MRS2-like, magnesium homeostasis factor (S. cerevisiae)
228544_s_at	0.909153	0.907821	0.683262	0.589652	CSRP2BP	AA780252	CSRP2 binding protein
228556_at	0.922368	0.643154	0.878742	0.548221	YTHDC1	AI990739	YTH domain containing 1
228558_at	1.06614	0.979375	0.613541	0.659205	C14orf80	AL518291	AL518291 Homo sapiens NEUROBLASTOMA Homo sapiens cDNA clone CS0DA009YD24 3-PRIME, mRNA sequence.
228603_at	1.07011	0.875008	0.834895	0.603205	HBA2	AA977481	Transcribed locus
228604_at	1.09473	1.11249	1.16954	1.57535	MGC34648	AI805069	CDNA FLJ41946 fis, clone PLACE6019701
228612_at	0.940851	0.825991	0.731532	0.662228		AI571730	CDNA clone IMAGE:5277380
228494_at	0.97989	0.572697	0.805043	0.654907	PPP1R9A	AI888150	Protein phosphatase 1, regulatory (inhibitor) subunit 9A
228469_at	0.957694	0.766521	0.689717	0.594315	PPID	BF431902	Peptidylprolyl isomerase D (cyclophilin D)
228497_at	0.971624	1.19275	1.54447	1.32929	SLC22A15	AI279062	Solute carrier family 22 (organic cation transporter), member 15
228517_at	0.984671	0.831267	0.551188	0.601744	C1orf149	AW466905	Chromosome 1 open reading frame 149
228515_at	1.03632	0.979888	0.603326	0.807835	LOC90784	AU149280	Hypothetical protein LOC90784
228742_at	0.984826	0.858783	1.01942	1.53596		AA745978	Full length insert cDNA clone YQ54B06
228711_at	0.947177	0.816243	0.735753	0.641859	ZNF37A	BF059259	Zinc finger protein 37A
228726_at	1.07043	1.2772	1.22878	1.55379	SERPINB1	AW512196	Transcribed locus
228763_at	0.99507	0.968366	0.66627	0.616677	CHMP4A	AI813313	Chromatin modifying protein 4A
228643_at	0.882146	0.572275	0.572328	0.456742		AA699852	CDNA clone IMAGE:5277380
228645_at	0.919657	0.870043	0.692383	0.540103	SNHG9	AV762892	Small nucleolar RNA host gene (non-protein coding) 9
228686_at	0.988338	0.708058	0.626706	0.61794	FLJ33630	BE217923	Hypothetical protein LOC644873
228702_at	0.972846	0.88149	0.622201	0.772147	FLJ43663	AL569506	Hypothetical protein FLJ43663
228253_at	1.09668	1.04849	0.84233	0.499261	LOXL3	AI917716	Lysyl oxidase-like 3
228229_at	0.973703	0.797549	0.501834	0.664298	ZNF526	BF512165	Zinc finger protein 526
228238_at	0.903545	0.747473	0.557039	0.546419	GAS5	AW105301	Growth arrest-specific 5
228271_at	0.977967	0.96249	0.645085	0.705104	SND1	AW001186	CDNA FLJ41736 fis, clone HLUNG2019058
228259_s_at	1.03515	1.39557	0.611078	0.841226	EPB41L4A	AW590155	Erythrocyte membrane protein band 4.1 like 4A
228261_at	0.999522	1.07285	0.847977	0.602178	MIB2	BE045549	Mindbomb homolog 2 (Drosophila)
228275_at	0.913793	0.778267	0.653785	0.831704		AI200555	CDNA FLJ32438 fis, clone SKMUS2001402
228272_at	1.09143	1.05592	0.883081	0.632838	RP11-413M3.2	AI768208	Similar to CG12379-PA
228180_at	0.940512	1.01737	0.584255	0.788483	SMU1	AA805653	Transcribed locus
228173_at	0.982403	0.782562	0.555564	0.736741	GNAS	AA810695	GNAS complex locus
228190_at	0.953937	0.662776	0.659334	0.687132	ATG4C	BF197009	ATG4 autophagy related 4 homolog C (S. cerevisiae)
228401_at	1.03536	0.93748	1.30967	1.62248	ATAD2	AI656807	ATPase family, AAA domain containing 2
228408_s_at	0.97175	0.836126	0.753501	0.657846	SDAD1	AI738666	SDA1 domain containing 1
228387_at	0.955923	0.62144	0.674854	0.52473		AI384076	MRNA; cDNA DKFZp686B0610 (from clone DKFZp686B0610)
228429_x_at	1.05071	0.617804	0.841146	0.587823	KIF9	BG168764	Kinesin family member 9
228420_at	1.01163	0.713411	0.638976	0.554568	PDCD2	AW590850	CDNA clone IMAGE:4293096
228316_at	1.05347	0.917888	0.634426	1.0556	FLJ31438	AA905470	Hypothetical protein FLJ31438
228301_x_at	1.03502	1.04817	0.844015	0.624121	NDUFB10	AA854479	aj75a10.s1 Soares_parathyroid_tumor_NbHPA Homo sapiens cDNA clone IMAGE:1402266 3' similar to SW:NIDM_BOVIN Q02373 NADH-UBIQUINONE OXIDOREDUCTASE PDSW SUBUNIT ;, mRNA sequence.
228379_at	1.24515	1.51466	1.45006	1.10109	NUTF2	AW071847	Nuclear transport factor 2
228351_at	1.07119	0.858199	0.726949	0.647761	LGALS8	AA149823	Lectin, galactoside-binding, soluble, 8 (galectin 8)
228353_x_at	0.979928	1.04269	1.15763	1.6466	STS-1	AA233308	Cbl-interacting protein Sts-1
233648_at	0.988862	0.873827	0.618772	0.932911	SNF1LK2	AK026914	CDNA: FLJ23261 fis, clone COL05862
233589_x_at	1.01761	1.1154	1.53764	1.13596	FLJ20245; RP13-122B23.4	AK000392	chromosome 9 open reading frame 167
233596_at	0.93558	0.786964	0.548197	0.664987	RAP80	AF113675	Clone FLB2543
233637_at	1.03114	0.744455	0.39145	0.563624	WDR42A	AU146915	WD repeat domain 42A
233713_at	1.01744	0.847732	0.568	0.837602	SMYD2	AK022181	CDNA FLJ12119 fis, clone MAMMA1000092
233746_x_at	0.978663	1.01646	0.680602	0.471195	HYPK	AW953521	Huntingtin interacting protein K
233800_at	1.07263	0.644843	0.615192	0.422544	AP2B1	AA805082	ob86d02.s1 NCI_CGAP_GCB1 Homo sapiens cDNA clone IMAGE:1338243 3', mRNA sequence.
233440_at	1.05619	1.0905	0.494256	0.837327	LOC647079	AL119001	CDNA FLJ12367 fis, clone MAMMA1002413
233461_x_at	0.937716	0.605913	0.734078	0.768887	ZNF226	AK023091	zinc finger protein 226
233473_x_at	1.03026	0.824453	0.6239	0.85773	USP15	AU156202	CDNA FLJ13434 fis, clone PLACE1002578
233562_at	0.964012	1.07636	0.734261	0.570513	MGC16291	AK024638	hypothetical protein MGC16291
233496_s_at	0.916609	0.801237	0.715403	0.661891	CFL2	AV726166	Cofilin 2 (muscle)
234040_at	0.949311	0.705315	0.692132	0.469171	HELLS	AU150825	Helicase, lymphoid-specific
234148_at	1.11686	0.849611	0.497487	0.645478	PPP2R4	AK025238	CDNA: FLJ21585 fis, clone COL06903
234059_at	0.986501	0.776991	0.568604	0.682368	MYBL2	AU147174	CDNA FLJ12093 fis, clone HEMBB1002603
234135_x_at	0.974079	0.833366	0.634674	0.828881	PALLD	AK021652	CDNA FLJ11590 fis, clone HEMBA1003758
233850_s_at	1.08416	1.25263	1.59034	1.07315	KIAA1442	AL035460
233803_s_at	0.99807	0.874144	0.838942	0.643443	P160; PAP2; FLJ37886	AL136595	MYB binding protein (P160) 1a
233841_s_at	0.985632	0.913153	0.661392	0.977532	SDS3; SAP45; FLJ00052; MGC104711	AK026749	suppressor of defective silencing 3 homolog (S. cerevisiae)
233832_at	0.958481	0.751131	0.636163	0.76731	LOC133491	AK021824	CDNA FLJ11762 fis, clone HEMBA1005670
233940_at	1.03147	0.859446	0.620774	0.792072	EML4	AK022801	CDNA FLJ12739 fis, clone NT2RP2000498
232940_s_at	1.07572	0.737164	0.616077	0.924088	HALR; FLJ12625; FLJ38309; KIAA1506; MGC119851; MGC119852; MGC119853; DKFZp686C08112	AK025911	myeloid/lymphoid or mixed-lineage leukemia 3
232951_at	0.909971	0.789194	0.536424	0.714537	DLK1	AV710143	CDNA FLJ10136 fis, clone HEMBA1003129
232890_at	1.04	0.833008	0.557436	0.675786		AK021423	Homo sapiens cDNA FLJ11361 fis, clone HEMBA1000243.
233014_at	0.979156	0.746727	0.575286	0.676163	IDI1	AK022980	CDNA FLJ12918 fis, clone NT2RP2004580
233030_at	1.08143	0.891145	0.647635	0.980903	ADPN; C22orf20; iPLA(2)epsilon	AK025665	patatin-like phospholipase domain containing 3
232974_at	0.799661	0.86178	0.559938	0.664916	HDHD1A	AU148256	CDNA FLJ12417 fis, clone MAMMA1003039
232991_at	1.01579	0.961303	0.550906	0.736054	NBR2	AK021675	Neighbor of BRCA1 gene 2
232759_at	0.999335	0.896449	0.512302	0.819763	INVS	AU146536	CDNA FLJ44437 fis, clone UTERU2019710
232710_at	0.996482	1.04944	0.61363	0.861094	GTF2IP1	AK021477	CDNA FLJ11415 fis, clone HEMBA1000942
232865_at	0.961685	0.915479	0.555107	0.86506	AFF4	N59653	AF4/FMR2 family, member 4
232780_s_at	0.98616	0.594626	0.813797	0.793054	Zfp691; RP11-342M1.5	AK000938	zinc finger protein 691
232784_at	0.99352	0.961468	0.658526	0.625799		R42604	yg02f12.s1 Soares infant brain 1NIB Homo sapiens cDNA clone IMAGE:30957 3' similar to gb|K01563|HUMCRHY3 Human Ro RNA (rRNA);, mRNA sequence.
233271_at	0.928897	0.857682	0.63934	0.790758		AU145563	AU145563 HEMBA1 Homo sapiens cDNA clone HEMBA1005133 3', mRNA sequence.
233270_x_at	0.891257	0.717199	0.646792	0.666977	PCM1	AU146939	CDNA FLJ12039 fis, clone HEMBB1001930
233303_at	0.971241	0.917046	0.609726	0.671056	UBE2D3	AL110175	MRNA; cDNA DKFZp564H0616 (from clone DKFZp564H0616)
233290_at	1.03654	0.736186	0.624059	1.02069	PKD2	AU145280	CDNA FLJ11451 fis, clone HEMBA1001433
233296_x_at	0.678002	0.673282	0.442712	0.571924	IGHG1	AU147291	CDNA FLJ12131 fis, clone MAMMA1000254
233246_at	0.952881	0.877052	0.514848	0.79917	ARL13B	AI523450	HSPC090
233248_at	0.994406	0.947655	0.518913	0.660497	PTMA	AK022028	CDNA FLJ11966 fis, clone HEMBB1001114
233252_s_at	0.975592	0.775201	0.630266	1.01504	STRBP	AK024960	Spermatid perinuclear RNA binding protein
233350_s_at	0.982568	0.945221	0.842545	0.590744	TEX264	AU158474	Testis expressed 264
233319_x_at	0.988723	0.76007	0.641792	0.857005	PHACTR4	AK023907	CDNA FLJ13845 fis, clone THYRO1000815
233315_at	1.03713	1.02486	0.49434	0.911475	CTBP2	AK024947	CDNA: FLJ21294 fis, clone COL01981
233105_at	0.930939	0.654657	0.355724	0.471894		AK026280	CDNA: FLJ22627 fis, clone HSI06152
233124_s_at	0.991025	0.796444	0.765026	0.592474	dJ351K20.2; DKFZp762M1110	AK021464	enoyl Coenzyme A hydratase domain containing 1
233058_at	0.917965	0.603382	0.82629	0.796842	MCLC	BG169945	CDNA FLJ20046 fis, clone COL00573
232889_at	1.05639	1.00326	0.503711	0.802768	LOC153561	AU147591	AU147591 MAMMA1 Homo sapiens cDNA clone MAMMA1001117 3', mRNA sequence.
233085_s_at	0.899773	0.597877	0.689106	0.767791	OBFC2A	AV734843	Oligonucleotide/oligosaccharide-binding fold containing 2A
233070_at	0.901803	0.603719	0.510323	0.582417	ZNF197	AL117657	Zinc finger protein 197
233225_at	1.05217	0.831862	0.484231	0.821839	CENTG2	AK000798	CDNA FLJ20791 fis, clone COL01392
233231_at	0.968217	0.51474	0.348447	0.825041	MCCC2	AU156915	Methylcrotonoyl-Coenzyme A carboxylase 2 (beta)
235223_at	0.820524	0.656788	0.532917	0.627677	C6orf153	AW515799	Chromosome 6 open reading frame 153
235197_s_at	0.924586	0.601327	0.659066	0.661509	OSTM1	AV713913	Osteopetrosis associated transmembrane protein 1
235260_s_at	0.992867	0.881756	0.716831	0.613565	C4orf28	AA398590	Chromosome 4 open reading frame 28
235263_at	0.966414	0.651325	0.924998	0.673369	LOC442582	BF530545	STAG3-like
235274_at	0.99657	0.914222	0.608036	0.805814		AA740632	Transcribed locus
235252_at	1.10575	1.31	1.45063	1.53352	KSR1	AI090141	Kinase suppressor of ras 1
235244_at	0.99598	0.842945	0.676781	0.604577	CCDC58	BF001285	Coiled-coil domain containing 58
235143_at	1.07554	1.05263	1.38555	1.58752	DKFZP566M114	AI963571	wr65a05.x1 NCI_CGAP_Ut1 Homo sapiens cDNA clone IMAGE:2492528 3', mRNA sequence.
235172_at	0.951358	0.795657	0.542246	0.670798		AW977516	Transcribed locus
235190_at	1.34584	0.858628	0.883754	0.964681	CALM2	BF591288	Transcribed locus
235159_at	1.01898	0.963043	0.626424	0.737346	SNX13	AW296028	CDNA FLJ32348 fis, clone PROST2007200
235406_x_at	0.948554	0.595329	0.455029	0.582296	RGS22	BF512190	CDNA clone IMAGE:4814828
235365_at	0.970363	0.997061	0.565118	0.962565	DFNB59	AA744520	Deafness, autosomal recessive 59
235432_at	0.895784	0.643179	0.710168	1.0321	NPHP3	BE865779	601678163F1 NIH_MGC_53 Homo sapiens cDNA clone IMAGE:3960782 5', mRNA sequence.
235435_at	0.831861	0.59616	0.756484	0.609878	AASDH	BF433048	2-aminoadipic 6-semialdehyde dehydrogenase
235436_at	0.951561	0.910254	0.671072	0.635223	DDX31	BE503800	Transcribed locus
235411_at	0.958101	0.727402	0.553206	0.628245	PGBD1	BE883300	PiggyBac transposable element derived 1
235419_at	0.859059	0.656658	0.570093	0.89311	ERRFI1	AW612461	Transcribed locus
235442_at	0.852542	0.867756	0.637983	0.530153	FLJ22965	BF974463	602243559F1 NIH_MGC_48 Homo sapiens cDNA clone IMAGE:4334607 5', mRNA sequence.
235315_at	1.0008	0.749213	0.535885	0.837556	TGFB1I4	AI809519	Transcribed locus
235286_at	0.951514	0.607331	0.697487	0.780079	CKLFSF1	BG533580	Transcribed locus
235287_at	0.963804	0.607893	0.915632	0.585271	CDK6	AW192700	Cyclin-dependent kinase 6
235329_at	0.932292	1.47869	1.21308	0.807431	NOXO1	AW083983	NADPH oxidase organizer 1
235324_at	1.05384	1.11911	0.777698	0.595124	SFRS3	AI445255	Transcribed locus
235333_at	0.871479	0.644583	0.761751	1.02257	B4GALT6	BG503479	UDP-Gal:betaGlcNAc beta 1,4- galactosyltransferase, polypeptide 6
234675_x_at	0.893338	1.24165	9.96626	2.12083	KIAA1033	AK027219	CDNA: FLJ23566 fis, clone LNG10880
234725_s_at	1.14449	1.17709	1.04884	1.53354	SemC; SEMAC; KIAA1745; MGC131831	AK026133	sema domain, immunoglobulin domain (Ig), transmembrane domain (TM) and short cytoplasmic domain, (semaphorin) 4B
234807_x_at	0.882485	0.914066	1.49389	1.04291	RPL7AL2	AL121916
234326_at	0.912985	0.800644	0.460099	0.745339	N4BP1	AK024901	CDNA: FLJ21248 fis, clone COL01235
234276_at	0.998529	0.859781	0.640904	1.02252	USP6NL	AL050124	MRNA; cDNA DKFZp586E151 (from clone DKFZp586E151)
234605_at	0.861524	0.765919	0.501236	0.624873	CDC14B	AK024886	CDC14 cell division cycle 14 homolog B (S. cerevisiae)
234623_x_at	1.02018	0.87338	1.74841	2.07343	MB2	AF100640	Homo sapiens metastasis related protein (MB2) mRNA, partial cds.
234486_at	0.959467	0.739626	0.617072	0.663694	OR51B2	AF137396
234471_s_at	0.988817	0.885326	0.801531	0.558712	CIA; bA465L10.6	AF230533	nuclear receptor coactivator 5
235053_at	0.939523	0.962683	0.60591	0.684839		AI077461	oz37d07.x1 Soares_NhHMPu_S1 Homo sapiens cDNA clone IMAGE:1677517 3' similar to contains Alu repetitive element;contains element LTR7 repetitive element ;, mRNA sequence.
235061_at	0.947987	1.11274	1.43302	2.08921	DKFZp761G058	AV706522	AV706522 ADB Homo sapiens cDNA clone ADBDAF07 5', mRNA sequence.
234993_at	1.02294	0.766957	0.466634	0.728977	ABHD13	BE301702	Abhydrolase domain containing 13
234989_at	0.987217	0.868527	0.575987	0.893161	TncRNA	AV699657	Trophoblast-derived noncoding RNA
234991_at	0.917399	0.728073	0.550663	0.897061	MAGEA4	AA702187	Transcribed locus
235014_at	1.03689	0.913688	0.766665	0.655852	LOC147727	BF345728	602019377F1 NCI_CGAP_Brn67 Homo sapiens cDNA clone IMAGE:4154971 5', mRNA sequence.
235024_at	0.933235	0.754622	0.649468	0.523705	PHF17	AI868315	PHD finger protein 17
235026_at	0.9021	0.897321	0.736051	0.65463	FLJ32549	AI885871	Transcribed locus
234997_x_at	1.30998	1.04555	1.39173	1.84789		AA343057	CDNA clone IMAGE:4794941
235008_at	0.853324	0.774794	0.633662	0.773105	ANKRD10	AW299775	Transcribed locus
235009_at	1.01516	0.465605	0.590206	0.616034	FAM44A	AI049791	Family with sequence similarity 44, member A
231199_at	0.989396	0.77035	0.57917	0.69848	SLC30A7	AA701676	Transcribed locus
231205_at	1.05955	0.898358	0.57432	0.828371	DDEF1	BF055351	Transcribed locus
231166_at	0.991529	0.840155	1.2515	1.72447	GPR155	AI733474	Transcribed locus
231281_at	1.10861	0.686506	0.390758	0.66522	ALB	AI032733	ox17d06.x1 Soares_fetal_liver_spleen_1NFLS_S1 Homo sapiens cDNA clone IMAGE:1656587 3' similar to contains MER1.b2 MER1 repetitive element ;, mRNA sequence.
231319_x_at	0.943806	0.883995	0.745168	0.580216	KIF9	AI657069	Kinesin family member 9
231332_at	0.994616	0.909933	0.765478	1.64566	C1orf144	AW295037	Transcribed locus
231013_at	1.00454	0.753437	0.772941	0.638424		W80446	Transcribed locus
230981_at	0.943007	0.760859	0.629607	0.702591	CATSPER3	AI219834	Cation channel, sperm associated 3
230998_at	1.06463	0.76137	0.664923	0.736281	CBX3	AV702506	Transcribed locus
231108_at	1.0131	0.777209	0.390698	0.631234		H43040	yo63e09.s1 Soares breast 3NbHBst Homo sapiens cDNA clone IMAGE:182632 3' similar to contains Alu repetitive element;, mRNA sequence.
231094_s_at	1.0419	0.867995	0.709098	0.572626	FTHFSDC1	AL035086	Human DNA sequence from clone RP1-44A20 on chromosome 6q23.1-24.3, complete sequence.
231039_at	0.957799	0.547689	0.627596	0.564811		BE549532	Transcribed locus
231061_at	1.07462	0.800868	0.839127	0.640357	HDCMA18P	AI671581	Transcribed locus, moderately similar to XP_420643.1 similar to HDCMA18P protein [Gallus gallus]
231779_at	1.11619	1.52325	1.4333	1.45281	IRAK2	AI246590	Interleukin-1 receptor-associated kinase 2
231727_s_at	0.906532	0.563032	0.599999	0.664073	MIFD; AD023; MGC45027	NM_020679	MIF4G domain containing
231763_at	0.985929	0.843549	0.636787	0.655896	RPC155	BG330541	602430426F1 NIH_MGC_18 Homo sapiens cDNA clone IMAGE:4548055 5', mRNA sequence.
231812_x_at	1.01961	1.04342	1.50297	1.09288	PHAX; FLJ13193	AK023255	RNA U, small nuclear RNA export adaptor (phosphorylation regulated)
231821_x_at	0.908223	0.6453	0.805608	0.739144	FLJ14186	AK024248	hypothetical gene supported by AK024248; AL137733
231443_at	0.915903	0.90111	0.824103	0.551105		AI346735	Transcribed locus
231500_s_at	0.889595	0.822825	0.857301	0.566307	BOLA2	AV650728	BolA homolog 2 (E. coli)
231502_at	0.989533	0.933311	0.533746	0.703345	EVI2A	BF591615	7n53d05.x1 NCI_CGAP_Lu24 Homo sapiens cDNA clone IMAGE:3568185 3', mRNA sequence.
231495_at	1.01803	0.478939	0.313198	0.446358	COL4A4	AA744508	Transcribed locus
231644_at	1.00856	1.06999	0.585109	0.759567		AW016812	Transcribed locus
231538_at	0.974027	0.878662	0.798273	0.665491	C11orf1	BG150085	Chromosome 11 open reading frame 1
231597_x_at	0.505913	0.417318	0.684412	0.553633		AI371550	ta51a07.x2 NCI_CGAP_Lu25 Homo sapiens cDNA clone IMAGE:2047572 3', mRNA sequence.
231576_at	1.33415	1.61213	1.56657	1.06794		AA829940	Transcribed locus
230528_s_at	0.956355	0.871215	0.658133	0.577907	MGC2752	AI651726	wb26a11.x1 NCI_CGAP_GC6 Homo sapiens cDNA clone IMAGE:2306780 3' similar to contains Alu repetitive element;, mRNA sequence.
230533_at	0.989946	0.823479	0.657806	0.81732	RACK7; PRKCBP1; PRO2893; MGC31836	AF144233	zinc finger, MYND-type containing 8
230551_at	0.828185	0.548654	0.643841	0.700157	KSR2	AI692426	Kinase suppressor of ras 2
230609_at	1.03829	0.899959	0.591466	1.00795	CLINT1	BF510429	Clathrin interactor 1
230623_x_at	0.952477	1.20317	1.57393	1.22203	USP28	AI609285	Ubiquitin specific peptidase 28
230434_at	0.952262	0.743268	0.761609	0.595009	KLHL23	AA769615	Kelch-like 23 (Drosophila)
230440_at	1.19831	1.3474	1.21841	1.60047	ZNF469	AW015537	Zinc finger protein 469
228380_at	0.923566	0.87174	0.871547	0.578743		BE551193	Transcribed locus
230494_at	1.03328	0.945732	0.58971	1.01565	SLC20A1	AI671885	Solute carrier family 20 (phosphate transporter), member 1
230521_at	1.06714	0.848858	0.624567	0.864551	C9orf100	BG028209	Chromosome 9 open reading frame 100
230522_s_at	1.00008	0.641114	0.466435	0.729651	C9orf100	BG028209	Chromosome 9 open reading frame 100
230449_x_at	0.935147	0.913643	0.583175	0.653144		AI253196	Transcribed locus, weakly similar to XP_519878.1 similar to ubiquitin-conjugating enzyme E2 variant 1 isoform c; DNA-binding protein [Pan troglodytes]
230871_at	1.01384	0.880513	0.745286	0.661809	DHX30	H67762	DEAH (Asp-Glu-Ala-His) box polypeptide 30
230879_at	0.970033	0.761047	0.736957	0.64742	BAG2	AI654091	BCL2-associated athanogene 2
230831_at	1.35568	1.16216	1.13479	1.30445		AW294986	Transcribed locus
230961_at	0.910706	0.956911	0.615482	0.698915		BE856980	7f72c12.x1 Soares_NSF_F8_9W_OT_PA_P_S1 Homo sapiens cDNA clone IMAGE:3300214 3', mRNA sequence.
230951_at	1.0235	0.882807	0.915479	1.53458	EPB41L5	AW242920	Transcribed locus
230917_at	1.01421	0.835104	0.633811	0.792695		AW611685	CDNA FLJ45450 fis, clone BRSTN2002691
230918_at	0.896739	0.84674	0.512058	0.647328	ADM	BE856598	7f65b03.x1 Soares_NSF_F8_9W_OT_PA_P_S1 Homo sapiens cDNA clone IMAGE:3299501 3' similar to contains element MER36 repetitive element ;, mRNA sequence.
230713_at	0.929349	0.582518	0.6135	0.929148	ZCCHC11	BF115786	Transcribed locus
230715_at	0.842006	0.78177	0.48727	0.73926	KIAA1729	AI138969	KIAA1729 protein
230728_at	0.93215	0.944363	0.583634	0.670735		BF516305	Transcribed locus
230727_at	1.07441	1.0421	0.880487	0.583755	PCGF2	BE348515	Polycomb group ring finger 2
230685_at	0.857752	0.911855	0.584242	0.612586	FLJ33630	AI799695	Hypothetical protein LOC644873
230688_at	0.904547	0.796981	0.646435	0.982836	MBNL2	AI631029	Clone IMAGE:238558, mRNA sequence
230769_at	1.16281	1.53034	1.89588	1.46128	DENND2C	AI916261	DENN/MADD domain containing 2C
230774_at	0.821342	0.563922	0.680848	0.790876	ZADH1	BE465894	Zinc binding alcohol dehydrogenase, domain containing 1
230742_at	1.02253	0.734403	0.588178	0.660957	RBM5	AA742596	ny88h08.s1 NCI_CGAP_GCB1 Homo sapiens cDNA clone IMAGE:1285407 3' similar to contains Alu repetitive element;, mRNA sequence.
230748_at	0.933327	0.729037	0.67361	0.596592	SLC16A6	AI873273	Transcribed locus
232344_at	0.98918	0.700702	0.419853	0.783919	RASA1	AK021812	CDNA FLJ11750 fis, clone HEMBA1005568
232307_at	0.982573	0.736144	0.390906	0.53074	TMEM123	AK021554	CDNA FLJ11492 fis, clone HEMBA1001939
232331_at	0.960728	0.930434	0.774324	0.658141	PPARG	AK027107	CDNA: FLJ23454 fis, clone HSI06959
232362_at	0.856642	0.666459	0.644367	0.619029	NY-SAR-41	AL139421	Human DNA sequence from clone RP4-717I23 on chromosome 1p21.2-22.3, complete sequence.
232356_at	0.924987	0.718626	0.631992	0.710388	KIAA0143	AW003230	CDNA FLJ13539 fis, clone PLACE1006640
232372_at	0.89411	0.832719	0.393818	0.64074	CDH4	AL157491	MRNA; cDNA DKFZp434K1111 (from clone DKFZp434K1111)
232218_at	0.99012	0.949106	0.745101	0.6376	TRUB2	AI937687	Transcribed locus
232215_x_at	1.00794	0.855133	0.615944	0.825182	FLJ11029	AK000296	proline rich 11
232175_at	1.00649	0.675546	0.47323	0.562809	ARF1	AI972094	Transcribed locus
232194_at	0.953994	0.597548	0.934952	1.01035	METTL4	AA764787	Methyltransferase like 4
232198_at	0.972277	0.695767	0.795705	0.621695	NFATC1	BF509125	Transcribed locus
232184_at	1.02575	0.727763	0.618946	0.660648	ALSJ; PLSJ; IAHSP; ALS2CR6; FLJ31851; KIAA1563; MGC87187	AK023024	amyotrophic lateral sclerosis 2 (juvenile)
232236_at	0.997106	0.758872	0.557303	0.608272	PDCD8	AK025799	CDNA: FLJ22146 fis, clone HEP22153
232238_at	0.99101	0.508006	0.71404	0.554075	ASP; MCPH5; Calmbp1; FLJ10517; FLJ10549; FLJ43117; DKFZp686N06184	AK001380	asp (abnormal spindle) homolog, microcephaly associated (Drosophila)
232264_at	1.01634	0.843391	0.563184	0.624441	PAPPA	AK022204	CDNA FLJ12142 fis, clone MAMMA1000356
232266_x_at	0.94481	0.787878	0.584188	0.83773	CDC2L5	AK024379	Cell division cycle 2-like 5 (cholinesterase-related cell division controller)
232592_at	1.04223	1.08323	0.482891	0.773353	PTPRG	AU146731	CDNA FLJ11982 fis, clone HEMBB1001335
232587_at	0.961325	0.689847	0.628757	0.934453	EML4	AI208611	Echinoderm microtubule associated protein like 4
232601_at	0.96383	0.702529	0.625148	0.653476		AL353951	MRNA; cDNA DKFZp761A0423 (from clone DKFZp761A0423)
232565_at	1.04334	0.525722	0.399746	0.63	RAB6IP2	AK025052	CDNA: FLJ21399 fis, clone COL03627
232569_at	1.03301	0.680155	0.837557	0.548494	TNRC5	AK024255	CDNA FLJ14193 fis, clone NT2RP3001115
232665_x_at	0.709067	0.896224	0.384738	0.801156	SMURF1	AL137424	SMAD specific E3 ubiquitin protein ligase 1
232627_at	0.936883	0.883013	0.604815	0.96381	HGS	AA161299	CDNA FLJ11421 fis, clone HEMBA1000991
232615_at	0.92173	0.805371	0.591967	0.706793	LOC653505	AA632758	Transcribed locus
232637_at	0.879372	0.835804	0.635067	0.628398	2002-09-01	AK025163	Septin 2
235028_at	0.961418	0.93693	0.512071	0.745509		BG288330	Transcribed locus
232466_at	0.886945	0.736455	0.426979	0.769758	CUL4A	AU155661	Cullin 4A
232455_x_at	0.862753	0.640471	0.807766	0.902023	GPBP1	AU145408	GC-rich promoter binding protein 1
232469_x_at	0.957213	1.18783	0.599653	0.949124	C1orf191	AK023883	Chromosome 1 open reading frame 191
232522_at	0.920915	0.803388	0.382994	0.573717	TCF7L2	AK025137	CDNA: FLJ21484 fis, clone COL05256
231930_at	0.886094	0.60611	0.891739	0.999136	DKFZp547C176	AL359601	ELMO/CED-12 domain containing 1
231926_at	0.999849	0.756355	0.687842	0.611382	EPS15R	AK023744	epidermal growth factor receptor pathway substrate 15-like 1
231948_s_at	0.901485	0.773341	0.571727	0.575159	UBE2F	BG171548	Ubiquitin-conjugating enzyme E2F (putative)
231920_s_at	0.980712	0.714508	0.859893	0.562114	CSNK1G1	AK025179	Casein kinase 1, gamma 1
231914_at	1.0047	1.52762	1.52563	1.60625	NUDT14	W24623	Nudix (nucleoside diphosphate linked moiety X)-type motif 14
231969_at	1.15615	1.07229	0.933966	1.5074	DKFZp762K222	AB037813	storkhead box 2
231970_at	0.844671	0.580054	0.389047	0.471818	C14orf118	AK025117	Chromosome 14 open reading frame 118
231979_at	1.01197	0.902246	0.582914	0.851506		AU155091	CDNA FLJ13266 fis, clone OVARC1000960
231953_at	0.884739	0.693497	0.629154	0.564366	FAC1; FALZ; NURF301	AK027184	bromodomain PHD finger transcription factor
232097_at	1.03207	0.793468	0.584477	0.754848	TOX4	AA657818	TOX high mobility group box family member 4
232092_at	0.961626	1.05385	0.859688	0.607366	MCART1	AI268054	Mitochondrial carrier triple repeat 1
232149_s_at	1.0106	0.967005	0.838523	0.631215	NSMAF	BF056507	Neutral sphingomyelinase (N-SMase) activation associated factor
232012_at	0.881997	0.826155	0.559654	0.540075	CAPN1	AV691296	Transcribed locus
232017_at	0.951985	0.875491	0.578541	0.922016	ZO2; X104; ZO-2; MGC26306	AK025185	tight junction protein 2 (zona occludens 2)
232063_x_at	0.985597	0.901358	0.574643	0.751925	FARSB	AW024617	Phenylalanyl-tRNA synthetase, beta subunit
232075_at	0.953205	0.8707	0.650801	0.922729	REC14	BF791874	602252212F1 NIH_MGC_84 Homo sapiens cDNA clone IMAGE:4344603 5', mRNA sequence.
232065_x_at	0.978549	0.836892	0.777019	0.623558	CENPL	N29457	Centromere protein L
232023_at	0.927232	0.561074	0.622437	0.688597	TMEM67	AL575584	Transmembrane protein 67
203062_s_at	1.05834	0.956159	0.631507	0.651479	NFBD1; KIAA0170; DKFZp781A0122	NM_014641	mediator of DNA damage checkpoint 1
203065_s_at	0.552321	0.56405	0.518543	0.475876	CAV; VIP21; MSTP085	NM_001753	caveolin 1, caveolae protein, 22kDa
202974_at	1.10361	1.2754	1.25709	1.71296	MRG1; PEMP; AAG12; EMP55; DXS552; DXS552E	NM_002436	membrane protein, palmitoylated 1, 55kDa
203013_at	0.980237	0.91766	0.76591	0.644131	GCR2; HSGT1	NM_007265	ecdysoneless homolog (Drosophila)
203014_x_at	1.12226	1.28886	1.1575	1.50485	MAP; RUSC3; SGSM3; DKFZp761D051	NM_015705	RUN and TBC1 domain containing 3
203152_at	0.962278	0.927665	0.758494	0.646353	URIM; NLVCF; MGC9400; MRP-L22; FLJ41774	NM_003776	mitochondrial ribosomal protein L40
203150_at	1.03096	0.943635	0.710154	0.650101	p40; RAB9P40; bA65N13.1; DKFZp686P1077	NM_005833	Rab9 effector protein with kelch motifs
203173_s_at	1.03422	0.79498	0.678396	0.648241	MGC16824	AW080196	Esophageal cancer associated protein
203176_s_at	1.00492	0.723521	0.821384	0.614329	TFAM	BE552470	Transcription factor A, mitochondrial
203095_at	1.02622	0.836904	0.741605	0.604123	MTIF2	NM_002453	mitochondrial translational initiation factor 2
203119_at	1.01708	0.912145	0.719013	0.558119	MGC2574; FLJ22321	NM_024098	coiled-coil domain containing 86
203103_s_at	0.992931	0.930669	0.808231	0.659289	PSO4; SNEV; PRP19; UBOX4; hPSO4; NMP200	NM_014502	PRP19/PSO4 pre-mRNA processing factor 19 homolog (S. cerevisiae)
202836_s_at	0.980576	0.937067	0.810366	0.6564	DIB1; DIM1; TXNL4; HsT161; U5-15kD	NM_006701	thioredoxin-like 4A
202808_at	0.953036	0.913479	0.594205	0.715062	OPAL1; FLJ20154; FLJ20367; MGC125648	AK000161	chromosome 10 open reading frame 26
202773_s_at	0.896649	0.828028	0.725526	0.637238	SFRS8	AI023864	Splicing factor, arginine/serine-rich 8 (suppressor-of-white-apricot homolog, Drosophila)
202779_s_at	1.02454	0.859295	0.654054	0.641908	EPF5; E2EPF; E2-EPF	NM_014501	ubiquitin-conjugating enzyme E2S
202753_at	0.942038	0.921437	0.750127	0.62697	S10; p44S10; KIAA0107; SGA-113M	NM_014814	proteasome (prosome, macropain) 26S subunit, non-ATPase, 6
202755_s_at	1.13509	1.61876	1.34965	1.47558	GPC1	AI354864	Glypican 1
202919_at	0.979019	0.867078	0.776342	0.628715	2C4D; MOB1; MOB3; CGI-95; MGC12264	NM_015387	preimplantation protein 3
202916_s_at	0.969382	0.877575	0.640367	0.712036	FAM20B	NM_014864	family with sequence similarity 20, member B
202899_s_at	0.940301	0.950312	0.779738	0.569187	SRp20	NM_003017	splicing factor, arginine/serine-rich 3
202905_x_at	0.950001	0.702609	0.717941	0.538152	NBN	AI796269	Nibrin
202906_s_at	0.904601	0.762078	0.663061	0.621804	DECR; NADPH	AF049895	2,4-dienoyl CoA reductase 1, mitochondrial
202900_s_at	0.97129	0.887402	0.74663	0.666737	MGC8530	NM_002532	nucleoporin 88kDa
202939_at	0.934729	0.885987	0.827965	0.659628	FACE1; STE24; FACE-1; Ste24p; FLJ14968	NM_005857	zinc metallopeptidase (STE24 homolog, S. cerevisiae)
202882_x_at	0.977746	0.927973	0.700027	0.595964	RARG-1; C6orf90; MGC71933; dJ223E5.2	NM_016167	nucleolar protein 7, 27kDa
202875_s_at	0.920983	0.886838	0.81663	0.615475	PBX2	BE397715	Pre-B-cell leukemia homeobox 2
202870_s_at	0.996706	0.791909	0.52653	0.513702	CDC20A; p55CDC; MGC102824; bA276H19.3	NM_001255	cell division cycle 20 homolog (S. cerevisiae)
203479_s_at	0.972414	0.622944	0.582598	0.476959	HSHIN1	T79216	yd70h03.s1 Soares fetal liver spleen 1NFLS Homo sapiens cDNA clone IMAGE:113621 3', mRNA sequence.
203478_at	0.956052	0.932828	0.806835	0.639968	KFYI; MGC117464; MGC126847; MGC138266	NM_002494	NADH dehydrogenase (ubiquinone) 1, subcomplex unknown, 1, 6kDa
203468_at	1.05792	0.829444	0.625771	0.7175	PISSLRE	NM_003674	cyclin-dependent kinase (CDC2-like) 10
203518_at	1.07176	1.24434	1.40364	1.69838	CHS; CHS1	NM_000081	lysosomal trafficking regulator
203494_s_at	1.09322	1.11448	1.37017	1.56885	PIG8; TSP57; KIAA0092	NM_014679	centrosomal protein 57kDa
203490_at	0.843923	0.751432	0.57976	0.55089	MEF; ELFR	NM_001421	E74-like factor 4 (ets domain transcription factor)
203498_at	1.03109	0.785437	1.2609	1.7798	CSP2; RCN2; MCIP2; hRCN2; ZAKI-4	NM_005822	Down syndrome critical region gene 1-like 1
203403_s_at	0.961394	0.727357	0.659393	0.661454	DKFZp686P0776	NM_005977	ring finger protein (C3H2C3 type) 6
203439_s_at	0.965245	0.908193	0.639562	0.756678	STC-2; STCRP	BC000658	stanniocalcin 2
203442_x_at	1.14046	1.10994	1.09706	1.5231	EML3	AA478965	Echinoderm microtubule associated protein like 3
203628_at	1.33533	1.42491	1.48518	1.28825	IGF1R	H05812	yl77f04.s1 Soares infant brain 1NIB Homo sapiens cDNA clone IMAGE:44149 3', mRNA sequence.
203622_s_at	0.969903	0.871764	0.672834	0.581038	PNO1	NM_020143	partner of NOB1 homolog (S. cerevisiae)
203542_s_at	0.896677	1.18189	1.27508	1.93401	KLF9	AI690205	Kruppel-like factor 9
203534_at	1.01828	0.956023	0.743205	0.623358	CASM; YJL124C	NM_014462	LSM1 homolog, U6 small nuclear RNA associated (S. cerevisiae)
203550_s_at	0.993027	0.82641	0.741234	0.65665	COTE1; cote 1	NM_006589	chromosome 1 open reading frame 2
203551_s_at	0.976906	0.876556	0.59372	0.561825	COX11P	NM_004375	COX11 homolog, cytochrome c oxidase assembly protein (yeast)
203568_s_at	1.04033	0.985605	0.997381	1.4939	RNF15; RORET; MGC8946	NM_006355	tripartite motif-containing 38
203254_s_at	0.793117	0.672138	0.524992	0.860945	TLN; ILWEQ; KIAA1027	NM_006289	talin 1
203257_s_at	0.90105	0.820302	0.650695	0.636643	MGC4707; FLJ22210	NM_024113	chromosome 11 open reading frame 49
203239_s_at	1.00329	0.828451	0.593907	0.668048	NOT3; LENG2; NOT3H; KIAA0691	NM_014516	CCR4-NOT transcription complex, subunit 3
203245_s_at	0.969444	0.811815	0.729912	0.665963	TUSC4	BC002791	Homo sapiens cDNA clone IMAGE:3618875, **** WARNING: chimeric clone ****.
203269_at	0.968025	0.891629	0.640135	0.594132	FAN	NM_003580	neutral sphingomyelinase (N-SMase) activation associated factor
203200_s_at	1.01958	0.896796	0.724215	0.598516	MSR; MGC129643	NM_024010	5-methyltetrahydrofolate-homocysteine methyltransferase reductase
203201_at	1.05516	1.00676	0.58592	0.548617	CDG1; CDGS; CDG1a	NM_000303	phosphomannomutase 2
203232_s_at	1.02893	0.471432	0.640718	0.731636	ATX1; SCA1; D6S504E	NM_000332	ataxin 1
203212_s_at	1.08048	1.0405	0.939933	0.616653	CMT4B; CMT4B1; KIAA1073	NM_016156	myotubularin related protein 2
203380_x_at	0.985259	0.932828	0.657733	0.66859	HRS; SRP40	NM_006925	splicing factor, arginine/serine-rich 5
203391_at	0.975694	0.873337	0.720489	0.641584	PPIase; FKBP-13	NM_004470	FK506 binding protein 2, 13kDa
203378_at	1.12903	0.74051	0.570344	0.599121	KIAA0824	AB020631	PCF11, cleavage and polyadenylation factor subunit, homolog (S. cerevisiae)
203341_at	0.969618	0.912779	0.650192	0.592417	CBF2; NOC1; HSP-CBF	NM_005760	CCAAT/enhancer binding protein zeta
202138_x_at	1.02095	0.865203	0.7665	0.657931	JTV1; P38; AIMP2; PRO0992	NM_006303	JTV1 gene
202120_x_at	0.965572	0.799906	0.728494	0.655084	AP17; CLAPS2; AP17-DELTA	NM_004069	adaptor-related protein complex 2, sigma 1 subunit
202126_at	0.987957	1.04034	0.862444	0.662471	PRPF4B	AA156948	PRP4 pre-mRNA processing factor 4 homolog B (yeast)
202159_at	0.998823	0.90668	0.743655	0.618697	FRSA; CML33; FARSL; PheHA; FARSLA	NM_004461	phenylalanyl-tRNA synthetase, alpha subunit
202144_s_at	1.01729	0.984441	0.802013	0.628195	ADSL	NM_000026	adenylosuccinate lyase
202068_s_at	1.01138	0.749655	0.635033	0.980764	FH; FHC	NM_000527	low density lipoprotein receptor (familial hypercholesterolemia)
202104_s_at	0.961708	1.02993	0.63014	0.874613	CAR; PGN; CMAR; SPG5C; FLJ37308; MGC126331; MGC126332	NM_003119	spastic paraplegia 7 (pure and complicated autosomal recessive)
202094_at	0.981762	0.796906	0.64181	0.729408	BIRC5	AA648913	Baculoviral IAP repeat-containing 5 (survivin)
202227_s_at	1.00832	0.784651	0.64754	0.74081	SMAP; p120; SMAP2	NM_006696	bromodomain containing 8
202212_at	0.98869	0.868237	0.667532	0.534053	PES	NM_014303	pescadillo homolog 1, containing BRCT domain (zebrafish)
202219_at	0.99724	0.897396	0.666898	0.632074	CT1; CRTR; MGC87396	NM_005629	solute carrier family 6 (neurotransmitter transporter, creatine), member 8
202205_at	0.868633	0.709449	0.553372	0.613825	VASP	NM_003370	vasodilator-stimulated phosphoprotein
202206_at	1.34684	1.54846	1.66287	2.29988	ARL4C	AW450363	ADP-ribosylation factor-like 4C
201948_at	0.999121	0.955692	0.800935	0.644375	NGP1; Ngp-1; FLJ40906; HUMAUANTIG; dJ423B22.6	NM_013285	guanine nucleotide binding protein-like 2 (nucleolar)
201945_at	0.863672	0.780004	0.624092	0.677692	FUR; PACE; SPC1; PCSK3	NM_002569	furin (paired basic amino acid cleaving enzyme)
201932_at	1.04314	0.920585	0.691156	0.490512	MUF1; PP7759; MGC126571; MGC126573; RP4-636H5.2	NM_006369	leucine rich repeat containing 41
201934_at	0.952308	0.770503	0.653381	0.632359	PRO2730	N92524	zb28d02.s1 Soares_parathyroid_tumor_NbHPA Homo sapiens cDNA clone IMAGE:304899 3', mRNA sequence.
201867_s_at	1.09847	0.799955	0.684276	0.521411	TBL1X	AW968555	Transducin (beta)-like 1X-linked
201868_s_at	0.911476	0.546187	0.665834	0.524276	TBL1X	AI082187	Transducin (beta)-like 1X-linked
201869_s_at	0.948331	0.865575	0.653981	0.726129	TBL1X	BF593932	Transducin (beta)-like 1X-linked
201853_s_at	1.09289	0.786528	0.600536	0.721967	CDC25B	NM_021873	cell division cycle 25 homolog B (S. pombe)
202064_s_at	0.990606	0.764379	0.88798	0.650209	IBD2; PRO1063; SEL1-LIKE	AF052059	sel-1 suppressor of lin-12-like (C. elegans)
201996_s_at	0.970473	0.795287	0.757908	0.642215	SPEN	AL524033	Spen homolog, transcriptional regulator (Drosophila)
201993_x_at	1.00141	1.02179	0.772872	0.56633	HNRPDL	NM_005463	heterogeneous nuclear ribonucleoprotein D-like
202577_s_at	0.950131	0.96113	0.740291	0.634031	DDX19L; FLJ11126; DDX19-DDX19L; DKFZp686C21137	BC005162	DEAD (Asp-Glu-Ala-As) box polypeptide 19A
202591_s_at	0.967278	0.912754	0.780881	0.65698	SSBP	NM_003143	single-stranded DNA binding protein 1
202520_s_at	1.04623	0.931417	0.662093	0.769005	FCC2; COCA2; HNPCC; hMLH1; HNPCC2; MGC5172	NM_000249	mutL homolog 1, colon cancer, nonpolyposis type 2 (E. coli)
202556_s_at	0.951255	0.841649	0.805218	0.655063	P78; MCRS2; MSP58; ICP22BP	NM_006337	microspherule protein 1
202691_at	0.928983	0.878629	0.773303	0.557842	SMD1; SNRPD; HsT2456	NM_006938	small nuclear ribonucleoprotein D1 polypeptide 16kDa
202680_at	0.93681	0.806786	0.654005	0.722507	FE; TF2E2; TFIIE-B	NM_002095	general transcription factor IIE, polypeptide 2, beta 34kDa
202715_at	0.935147	0.994023	0.664013	0.800099	CAD	NM_004341	carbamoyl-phosphate synthetase 2, aspartate transcarbamylase, and dihydroorotase
202716_at	0.869453	0.777853	0.770951	0.627345	PTP1B	NM_002827	protein tyrosine phosphatase, non-receptor type 1
202725_at	0.927777	0.695179	0.501318	0.617867	RPB1; RPO2; POLR2; POLRA; RPBh1; RPOL2; RpIILS; hsRPB1; hRPB220; MGC75453	NM_000937	polymerase (RNA) II (DNA directed) polypeptide A, 220kDa
202705_at	0.991278	0.73104	0.578219	0.6683	HsT17299	NM_004701	cyclin B2
202640_s_at	0.909494	0.875515	0.681816	0.5699	DKFZp586I1520	NM_003624	RAN binding protein 3
202560_s_at	0.964404	0.865432	0.68717	0.659133	pp7704; MGC86949; MGC131924; RP1-178F15.2; DKFZP547E1010	NM_015607	chromosome 1 open reading frame 77
202624_s_at	0.959428	0.990198	0.647715	0.9392	CABIN1; CAIN; KIAA0330	NM_012295	calcineurin binding protein 1
202361_at	0.906529	0.85016	0.644035	0.686091	KIAA0079	NM_004922	SEC24 related gene family, member C (S. cerevisiae)
202344_at	1.03408	0.886577	0.611318	0.712689	HSTF1	NM_005526	heat shock transcription factor 1
202352_s_at	0.969485	0.883817	0.787464	0.659556	PSMD12	AI446530	Proteasome (prosome, macropain) 26S subunit, non-ATPase, 12
202347_s_at	0.989982	0.834354	0.698089	0.624808	LIG; HYPG; UBE2K	AB022435	huntingtin interacting protein 2
202380_s_at	0.987136	0.76252	0.58928	0.84669	p104; MGC90527; DKFZp686F1754; DKFZp686G0426; DKFZp686J06106; DKFZp686N24126	NM_005385	natural killer-tumor recognition sequence
202305_s_at	1.03188	0.832123	0.642217	0.67071	FEZ2	AI685892	Fasciculation and elongation protein zeta 2 (zygin II)
202298_at	1.00587	1.09011	0.801595	0.66149	MWFE; ZNF183; CI-MWFE	NM_004541	NADH dehydrogenase (ubiquinone) 1 alpha subcomplex, 1, 7.5kDa
202294_at	0.930212	0.73821	0.680827	0.609382	STAG1	AI126490	Stromal antigen 1
202330_s_at	1.016	0.984297	0.762815	0.644997	DGU; UDG; UNG1; HIGM4; UNG15; DKFZp781L1143	NM_003362	uracil-DNA glycosylase
202326_at	0.955627	0.888224	0.560768	0.671612	G9A; BAT8; NG36; C6orf30; FLJ35547; NG36/G9a	NM_006709	euchromatic histone-lysine N-methyltransferase 2
202339_at	1.03857	1.1772	0.755476	0.620114	SPK; SYM; FLJ27092	NM_004819	symplekin
202334_s_at	1.00323	1.04562	0.836703	0.615781	UBE2B	AI768723	Ubiquitin-conjugating enzyme E2B (RAD6 homolog)
202474_s_at	0.843854	0.763946	0.582414	0.473992	CFF; HCF1; HFC1; VCAF; HCF-1; MGC70925	NM_005334	host cell factor C1 (VP16-accessory protein)
202469_s_at	1.02207	0.950196	0.772045	0.656516	CPSF6	AU149367	Cleavage and polyadenylation specific factor 6, 68kDa
202458_at	0.811824	0.731785	0.63622	0.863714	SIG13; SPUVE; ZSIG13; MGC5107	NM_007173	protease, serine, 23
202488_s_at	0.911367	1.0748	1.51682	1.07197	MAT8; PLML; MAT-8; MGC111076	NM_005971	FXYD domain containing ion transport regulator 3
202481_at	0.927331	0.759417	0.662747	0.612109	SDR1; RDH17; Rsdr1; retSDR1	NM_004753	dehydrogenase/reductase (SDR family) member 3
202408_s_at	1.03105	0.913982	0.75993	0.650431	RP11; PRP31; NY-BR-99; DKFZp566J153	NM_015629	PRP31 pre-mRNA processing factor 31 homolog (S. cerevisiae)
202417_at	0.978079	0.913004	0.732908	0.654691	INrf2; KLHL19; MGC1114; MGC4407; MGC9454; KIAA0132; MGC10630; MGC20887	NM_012289	kelch-like ECH-associated protein 1
202394_s_at	0.960108	0.803326	0.653516	0.633234	FLJ11198; EST201864	NM_018358	ATP-binding cassette, sub-family F (GCN20), member 3
202407_s_at	0.942758	0.937495	0.733475	0.64209	PRPF31	BF342707	PRP31 pre-mRNA processing factor 31 homolog (S. cerevisiae)
202439_s_at	0.908835	0.929035	0.791698	0.599881	MPS2; SIDS	NM_000202	iduronate 2-sulfatase (Hunter syndrome)
202424_at	0.850902	0.767547	0.595287	0.72501	MEK2; MKK2; MAPKK2; PRKMK2	NM_030662	mitogen-activated protein kinase kinase 2
205123_s_at	1.04795	1.20659	1.18383	1.52141	H7365; C9orf2	NM_003692	transmembrane protein with EGF-like and two follistatin-like domains 1
205129_at	1.05122	0.87908	0.722483	0.598481	PORMIN; TMEM123	NM_006993	nucleophosmin/nucleoplasmin, 3
205094_at	1.03403	0.866709	0.655602	0.767141	PEX12	NM_000286	peroxisomal biogenesis factor 12
205096_at	0.900943	0.686034	0.697831	0.625245	POM121	NM_014833
205111_s_at	0.932611	0.66111	0.800346	1.07663	PLCE; NPHS3; FLJ23659; KIAA1516	NM_016341	phospholipase C, epsilon 1
205158_at	0.899195	0.775735	0.971653	1.49546	RNS4; MGC9306	NM_002937	ribonuclease, RNase A family, 4
205167_s_at	0.891743	0.603979	0.707536	0.783098	CDC25	NM_001790	cell division cycle 25 homolog C (S. pombe)
205133_s_at	0.959903	0.844495	0.669128	0.621623	CPN10; GROES; HSP10	NM_002157	heat shock 10kDa protein 1 (chaperonin 10)
205135_s_at	1.00398	0.774351	0.69454	0.634992	NUFIP1	AL049842	nuclear fragile X mental retardation protein interacting protein 1 pseudogene
205153_s_at	0.959497	0.566384	0.655152	0.588263	p50; Bp50; CDW40; MGC9013; TNFRSF5	NM_001250	CD40 molecule, TNF receptor superfamily member 5
205034_at	0.993798	1.32039	1.41454	1.28929	CCNE2	NM_004702	cyclin E2
205016_at	0.986229	1.36665	1.27567	1.7273	TFGA	NM_003236	transforming growth factor, alpha
205018_s_at	1.37151	1.39428	1.67087	1.80595	MBNL2	NM_005757	muscleblind-like 2 (Drosophila)
205070_at	0.891461	0.738386	0.681014	0.610456	Eaf4; ING2; p47ING3; FLJ20089	NM_019071	inhibitor of growth family, member 3
205071_x_at	0.828052	0.646832	0.622548	0.634921	XRCC4	AB017445	X-ray repair complementing defective repair in Chinese hamster cells 4
205333_s_at	0.93629	0.800269	0.525766	0.798962	FACE2; RCE1A; RCE1B	NM_005133	RCE1 homolog, prenyl protein peptidase (S. cerevisiae)
205324_s_at	0.98707	0.950798	0.753736	0.662809	JM23; MRX9; SPB1; TRM7; CDLIV; MRX44	NM_012280	FtsJ homolog 1 (E. coli)
205340_at	0.981532	0.700825	0.605663	0.593506	BIF1; PATZ2; ZNF450	NM_014797	zinc finger and BTB domain containing 24
205195_at	0.953423	0.814604	0.666819	0.625037	AP19; CLAPS1; SIGMA1A	NM_001283	adaptor-related protein complex 1, sigma 1 subunit
205187_at	1.08998	1.10783	1.4311	1.09104	Dwfc; JV5-1; MADH5; DKFZp781C1895; DKFZp781O1323	AF010601	SMAD family member 5
205224_at	1.08606	1.22029	0.713643	0.644674	SURF-2	NM_017503	surfeit 2
204808_s_at	1.01309	0.87712	0.752095	0.66001	HP10481	NM_014254	transmembrane protein 5
204790_at	0.976084	1.10262	1.2135	1.59284	MADH7; MADH8; FLJ16482	NM_005904	SMAD family member 7
204795_at	0.968973	0.902254	0.684156	0.556116	CAT56; MGC161733; MGC161735	NM_025263	proline rich 3
204824_at	0.972167	0.974892	0.761987	0.587295	FLJ27463	NM_004435	endonuclease G
204853_at	0.988053	0.90924	0.784521	0.6595	ORC2	NM_006190	origin recognition complex, subunit 2-like (yeast)
204717_s_at	0.965976	0.83446	0.671243	0.581202	ENT2; DER12; HNP36	AF034102	solute carrier family 29 (nucleoside transporters), member 2
204773_at	0.898908	0.638741	0.84937	1.01037	MGC2146	NM_004512	interleukin 11 receptor, alpha
204770_at	0.874182	0.887771	0.884576	0.634022	APT2; PSF2; ABC18; ABCB3; RING11; D6S217E	NM_000544	transporter 2, ATP-binding cassette, sub-family B (MDR/TAP)
204750_s_at	1.12592	0.77832	0.798238	0.552344	DSC2	BF196457	Desmocollin 2
204766_s_at	0.934858	0.777135	0.801146	0.594564	MTH1	NM_002452	nudix (nucleoside diphosphate linked moiety X)-type motif 1
204947_at	1.09908	1.76676	1.38699	1.33094	RBP3; E2F-1; RBBP3	NM_005225	E2F transcription factor 1
204957_at	0.8599	0.743929	0.652059	0.567395	ORC5; ORC5P; ORC5T	NM_002553	origin recognition complex, subunit 5-like (yeast)
205004_at	0.886432	0.681225	0.727942	0.585076	NRF; ITBA4	NM_017544	NF-kappaB repressing factor
204998_s_at	0.998657	0.871023	0.627136	0.501368	ATFX; FLJ34666; HMFN0395	NM_012068	activating transcription factor 5
205010_at	0.963066	0.846732	0.749437	0.591256	FLJ10613; RP11-353K22.1	NM_019067	guanine nucleotide binding protein-like 3 (nucleolar)-like
204873_at	0.967924	1.02299	1.36277	1.50868	ZWS1	NM_000466	peroxisome biogenesis factor 1
204877_s_at	0.893117	1.00168	0.78064	0.586259	TAOK2	AW007163	TAO kinase 2
204859_s_at	1.0058	1.15569	1.30458	1.54717	CED4; DKFZp781B1145	NM_013229	apoptotic peptidase activating factor 1
204918_s_at	1.11696	0.724627	0.650136	1.03908	AF9; YEATS3; FLJ2035	NM_004529	myeloid/lymphoid or mixed-lineage leukemia (trithorax homolog, Drosophila); translocated to, 3
204919_at	1.17399	1.21428	1.58593	1.09985	LPRP; PROL4; DKFZp779L1763	NM_007244	proline rich 4 (lacrimal)
204909_at	0.908689	0.709857	0.546815	0.543541	P54; RCK; HLR2; FLJ36338	NM_004397	DEAD (Asp-Glu-Ala-Asp) box polypeptide 6
205895_s_at	0.695214	0.73023	0.581364	0.469465	P130; NOPP130; NOPP140; KIAA0035; NS5ATP13	NM_004741	nucleolar and coiled-body phosphoprotein 1
205925_s_at	1.00994	1.14401	1.51223	1.2648	RAB3B	NM_002867	RAB3B, member RAS oncogene family
205881_at	1.17112	1.52668	1.31361	1.21576	Cos52; ZNF520; Zfp520	NM_003426	zinc finger protein 74
205967_at	0.903712	0.75902	0.553786	0.400004	H4/g; H4FG; dJ221C16.1	NM_003542	histone cluster 1, H4c
205986_at	0.983754	1.37525	1.51835	1.81383	AATK	NM_004920
205992_s_at	1.28112	1.09453	1.19226	1.51818	IL-15; MGC9721	NM_000585	interleukin 15
205955_at	0.924726	0.79681	0.918455	0.559766	TAF6L	NM_018336	TAF6-like RNA polymerase II, p300/CBP-associated factor (PCAF)-associated factor, 65kDa; synonyms: PAF65A, MGC4288, FLJ11136; PAF65-alpha; TAF6-like RNA polymerase II, p300/CBP-associated factor (PCAF)-associated factor, 65 kD; p300/CBP-associated factor (PCAF)-associated factor 65; Homo sapiens TAF6-like RNA polymerase II, p300/CBP-associated factor (PCAF)-associated factor, 65kDa (TAF6L), mRNA.
205763_s_at	0.940527	0.912861	0.738633	0.616946	MrDb; FLJ33908	NM_006773	DEAD (Asp-Glu-Ala-Asp) box polypeptide 18
205777_at	1.21695	1.6696	1.47613	1.10194	MKP4; MKP-4	NM_001395	dual specificity phosphatase 9
205741_s_at	1.02089	1.00367	1.01523	0.566524	DTN; DRP3; LVNC1; D18S892E	NM_001392	dystrobrevin, alpha
205809_s_at	0.991688	0.672108	0.813534	0.601555	WASL	BE504979	Wiskott-Aldrich syndrome-like
206115_at	0.922286	1.17405	0.945741	1.66189	PILOT; MGC138484	NM_004430	early growth response 3
206233_at	1.07248	1.01708	1.05679	1.58309	B4Gal-T6; beta4Gal-T6	AF097159	UDP-Gal:betaGlcNAc beta 1,4- galactosyltransferase, polypeptide 6
206197_at	0.932638	0.807774	0.681023	0.653941	NM23H5; NM23-H5	NM_003551	non-metastatic cells 5, protein expressed in (nucleoside-diphosphate kinase)
206184_at	1.08167	1.75056	1.35439	1.12323	CRKL	NM_005207	v-crk sarcoma virus CT10 oncogene homolog (avian)-like
206050_s_at	0.992204	0.968219	0.773578	0.632636	RAI; RNH; MGC4569; MGC18200; MGC54054	NM_002939	ribonuclease/angiogenin inhibitor 1
206031_s_at	1.10044	1.06082	0.876508	0.613761	ISOT	NM_003481	ubiquitin specific peptidase 5 (isopeptidase T)
206086_x_at	0.74512	0.574846	0.828961	0.599522	HH; HFE1; HLA-H; MGC103790; dJ221C16.10.1	AF115265	hemochromatosis
206081_at	0.970449	0.613458	0.736078	0.817497	NCKX; RODX; NCKX1; HsT17412; KIAA0702	NM_004727	solute carrier family 24 (sodium/potassium/calcium exchanger), member 1
205511_at	0.923384	0.578636	0.433361	0.538742	FLJ10038	NM_017976	GA binding protein transcription factor, beta subunit 2, 47kDa
205527_s_at	1.03706	0.8638	0.633853	0.577011	GEMIN4	NM_015487	gem (nuclear organelle) associated protein 4; synonyms: p97, HC56, HCAP1, HHRF-1, DKFZP434B131, DKFZP434D174; HCC-associated protein 1; component of gems 4; Homo sapiens gem (nuclear organelle) associated protein 4 (GEMIN4), mRNA.
205426_s_at	0.991803	1.87295	1.02334	1.36221	ILWEQ; MGC126506	U79734	huntingtin interacting protein 1
205420_at	0.801663	0.70972	0.587193	0.600676	RD; PTS2R; RCDP1	NM_000288	peroxisomal biogenesis factor 7
205436_s_at	0.988063	0.918048	0.730701	0.588827	H2AX; H2A.X; H2A/X	NM_002105	H2A histone family, member X
205406_s_at	0.993161	0.858249	0.650209	0.708272	SP17; SP17-1	NM_017425	sperm autoantigenic protein 17
205672_at	0.989938	0.928439	0.816844	0.646973	XP1; XPAC	NM_000380	xeroderma pigmentosum, complementation group A
205644_s_at	0.940138	0.918726	0.759051	0.64796	SMG; MGC117317	NM_003096	small nuclear ribonucleoprotein polypeptide G
205729_at	1.18469	1.57725	1.34253	1.44678	OSMRB; MGC75127; MGC150626; MGC150627	NM_003999	oncostatin M receptor
205708_s_at	0.995665	1.01058	0.852356	0.60375	TRPM2	AI051254	Transient receptor potential cation channel, subfamily M, member 2
205562_at	0.993825	0.807677	0.656467	0.606839	RP11-455B2.5	NM_006414	ribonuclease P/MRP 38kDa subunit
205571_at	0.967016	0.8173	0.627157	0.618214	MGC12290; MGC13378	NM_015929	lipoyltransferase 1
205555_s_at	1.09788	1.05725	1.19111	1.28399	FPP; MSH; PFM; CRS2; HOX8; PFM1	D31771	msh homeobox 2
205606_at	0.889283	0.748176	0.632764	0.745995	ADCAD2; FLJ90062; FLJ90421	NM_002336	low density lipoprotein receptor-related protein 6
205584_at	0.913675	0.766352	0.535011	0.860359	FLJ23018	NM_024810	hypothetical protein FLJ23018
205593_s_at	0.848688	0.744202	0.55271	0.867562	HSPDE9A2	NM_002606	phosphodiesterase 9A
203963_at	1.17424	1.06095	1.12546	1.30989	CAXII; FLJ20151; HsT18816	NM_001218	carbonic anhydrase XII
203971_at	0.967466	0.749375	0.655304	0.571836	CTR1; COPT1; hCTR1; MGC75487	NM_001859	solute carrier family 31 (copper transporters), member 1
203973_s_at	0.967714	0.829433	0.721184	0.620023	CELF; CRP3; C/EBP-delta; NF-IL6-beta	NM_005195	CCAAT/enhancer binding protein (C/EBP), delta
203998_s_at	0.544648	0.329564	0.433928	0.460502	SYT1	AV723167	Synaptotagmin I
203991_s_at	0.882243	0.710201	0.641643	0.901991	MGC141941; bA386N14.2; DKFZp686A03225	NM_021140	ubiquitously transcribed tetratricopeptide repeat, X chromosome
203926_x_at	0.930265	0.626925	0.588537	0.627578	ATP5D	NM_001687	ATP synthase, H+ transporting, mitochondrial F1 complex, delta subunit
203905_at	0.977932	0.836184	0.611467	0.5614	DAN	NM_002582	poly(A)-specific ribonuclease (deadenylation nuclease)
204104_at	0.921075	0.903558	0.685527	0.640766	SNAP45; PTFdelta	NM_003083	small nuclear RNA activating complex, polypeptide 2, 45kDa
204087_s_at	1.08327	0.985495	0.741441	0.63356	SMVT	NM_021095	solute carrier family 5 (sodium-dependent vitamin transporter), member 6
204142_at	1.02255	0.885152	0.656817	0.732509	RTS; TYMSAS; RTS beta; HSRTSBETA; RTS alpha	NM_017512	enolase superfamily member 1
204039_at	0.980139	0.885415	0.596542	0.907426	CEBP; C/EBP-alpha	NM_004364	CCAAT/enhancer binding protein (C/EBP), alpha
204035_at	0.849939	0.712311	0.573738	0.570403	SN; CHGC; SgII	NM_003469	secretogranin II (chromogranin C)
204033_at	0.923285	0.867626	0.663905	0.641956	16E1BP	NM_004237	thyroid hormone receptor interactor 13
204028_s_at	0.990154	0.844207	0.637987	0.73446	GAPCENA; TBC1D11; RP11-123N4.2; DKFZp586D2123	NM_012197	RAB GTPase activating protein 1
204080_at	1.0105	0.876448	0.716108	0.610634	FLJ13949	NM_025077	target of EGR1, member 1 (nuclear)
204058_at	0.994171	0.841162	0.760695	0.638473	ME1	AL049699
204064_at	0.942851	0.740609	0.557761	0.66143	P84; HPR1; P84N5	NM_005131	THO complex 1
204059_s_at	1.05346	0.9592	0.761783	0.66386	MES; HUMNDME	NM_002395	malic enzyme 1, NADP(+)-dependent, cytosolic
204061_at	0.960988	0.849903	0.6278	0.977574	PKX1	NM_005044	protein kinase, X-linked
203718_at	0.877142	0.823641	0.609483	0.854624	NTE; sws	NM_006702	patatin-like phospholipase domain containing 6
203712_at	0.972887	0.88335	0.78797	0.66343	PEN; PUF6; XTP5; HLA-HA8; MGC8749; RP11-526D20.2	NM_014878	KIAA0020
203743_s_at	0.935036	0.794119	0.713957	0.586409	TDG	NM_003211	thymine-DNA glycosylase
203731_s_at	0.885643	0.779128	0.609777	0.724819	ZFP95; FLJ39233; KIAA1015; MGC33710	NM_014569	zinc finger with KRAB and SCAN domains 5
203728_at	0.889057	0.78129	0.569286	0.695573	BAK; CDN1; BCL2L7; MGC3887; BAK-LIKE; MGC117255	NM_001188	BCL2-antagonist/killer 1
203737_s_at	0.989863	0.779157	0.553132	0.54007	PRC; KIAA0595; MGC74642; RP11-302K17.6	NM_015062	peroxisome proliferator-activated receptor gamma, coactivator-related 1
203735_x_at	0.946987	0.989617	1.54802	1.3385	PPFIBP1	N35896	yy28c08.s1 Soares melanocyte 2NbHM Homo sapiens cDNA clone IMAGE:272558 3' similar to contains Alu repetitive element;, mRNA sequence.
203653_s_at	0.943927	0.755246	0.63088	0.580064	COIL	BG391060	Coilin
203659_s_at	0.978635	0.856785	0.677048	0.587573	CAR; LEU5; RFP2; DLEU5; RNF77	NM_005798	tripartite motif-containing 13
203665_at	1.45432	1.17075	1.03662	1.09624	HO-1; bK286B10	NM_002133	heme oxygenase (decycling) 1
203677_s_at	0.974114	0.887654	0.673066	0.650836	TRBP; TRBP1; TRBP2	NM_004178	Tar (HIV-1) RNA binding protein 2
203845_at	0.983631	0.794795	1.09819	1.88928	PCAF	AV727449	P300/CBP-associated factor
203832_at	0.931961	0.880003	0.76246	0.629581	SMF	NM_003095	small nuclear ribonucleoprotein polypeptide F
203775_at	0.958989	0.860458	0.670693	0.639149	CTLN2; CITRIN; ARALAR2	NM_014251	solute carrier family 25, member 13 (citrin)
203785_s_at	0.982299	0.784238	0.595853	0.621087	MDDX28; FLJ11282	NM_018380	DEAD (Asp-Glu-Ala-Asp) box polypeptide 28
203701_s_at	0.984129	1.0421	0.756213	0.620227	FLJ20244	NM_017722	TRM1 tRNA methyltransferase 1 homolog (S. cerevisiae)
203764_at	0.953424	0.627762	0.567659	0.636098	DLG1; HURP; KIAA0008	NM_014750	discs, large homolog 7 (Drosophila)
203798_s_at	0.76895	0.711791	0.622144	0.729489	HLP3; VILIP; HPCAL3; HUVISL1; VILIP-1	NM_003385	visinin-like 1
204507_s_at	0.850387	0.775711	0.70141	0.582328	CNB; CNB1; CALNB1	NM_000945	protein phosphatase 3 (formerly 2B), regulatory subunit B, alpha isoform
204514_at	1.05306	0.82506	0.591436	0.454127	DPH2L2	NM_001384	DPH2 homolog (S. cerevisiae)
204552_at	1.11732	1.57368	1.11965	1.36574	INPP4A	AA355179	EST63624 Jurkat T-cells V Homo sapiens cDNA 5' end, mRNA sequence.
204405_x_at	0.96892	0.948519	0.795488	0.645045	DIMT1; HSA9761	NM_014473	DIM1 dimethyladenosine transferase 1-like (S. cerevisiae)
204481_at	0.922897	0.784147	0.584052	0.645239	BR140	NM_004634	bromodomain and PHD finger containing, 1
204453_at	0.968128	0.651258	0.571184	0.590489	HPF2	NM_003428	zinc finger protein 84
204651_at	0.977617	0.826456	0.703566	0.589002	NRF1	AW003022	Nuclear respiratory factor 1
204680_s_at	0.919279	0.591077	1.11381	0.690722	RAPGEF5	AI263837	Rap guanine nucleotide exchange factor (GEF) 5
204559_s_at	0.970899	0.930877	0.828424	0.652473	YNL147W	NM_016199	LSM7 homolog, U6 small nuclear RNA associated (S. cerevisiae)
204630_s_at	1.0445	0.712224	0.664223	0.582908	P28; GS28; GOS28; GOS28/P28	NM_004871	golgi SNAP receptor complex member 1
204225_at	0.866839	0.655168	0.635286	0.835595	HD4; HDACA; HA6116; HDAC-A; KIAA0288	NM_006037	histone deacetylase 4
204219_s_at	0.999706	0.977932	0.757983	0.64458	S4; p56; P26S4; MGC8541; MGC24583	NM_002802	proteasome (prosome, macropain) 26S subunit, ATPase, 1
204267_x_at	1.01604	0.983435	0.900913	0.59026	MYT1; FLJ20093; DKFZp547K1610	NM_004203	protein kinase, membrane associated tyrosine/threonine 1
204275_at	0.775348	0.886816	0.540292	0.905468	SOLH	AI796687	Small optic lobes homolog (Drosophila)
204270_at	0.989514	0.77618	0.793162	0.583611	SKI	AI568728	Transcribed locus, strongly similar to XP_530172.1 hypothetical protein XP_530172 [Pan troglodytes]
204256_at	0.968929	0.845394	0.645583	0.716579	FAE; LCE; MGC5487; FLJ23378	NM_024090	ELOVL family member 6, elongation of long chain fatty acids (FEN1/Elo2, SUR4/Elo3-like, yeast)
204178_s_at	1.04231	1.01852	0.728716	0.614607	SIP; COAA; SYTIP1; DKFZp779J0927	NM_006328	RNA binding motif protein 14
204195_s_at	0.93023	0.982131	0.856376	0.558351	PKNOX1	AL570914	PBX/knotted 1 homeobox 1
204181_s_at	1.04129	0.88272	0.602231	0.793761	ZNF297B	T90308	ye16a03.s1 Stratagene lung (#937210) Homo sapiens cDNA clone IMAGE:117868 3', mRNA sequence.
204366_s_at	0.971484	0.929395	0.785414	0.650633	KIAA0011; TFIIIC110; TFIIIC-BETA	NM_001521	general transcription factor IIIC, polypeptide 2, beta 110kDa
204396_s_at	1.10338	0.936131	1.19494	1.83336	GPRK5	NM_005308	G protein-coupled receptor kinase 5
204387_x_at	0.814356	0.76138	0.527479	0.667409	bMRP63; MGC3243	NM_024026	mitochondrial ribosomal protein 63
204278_s_at	0.980773	0.839602	0.670241	0.5916	EB9; PDAF; RCAS1	NM_004215	estrogen receptor binding site associated, antigen, 9
204283_at	0.959957	0.766446	0.784353	0.642089	FARS1; PheRS; HSPC320; dJ520B18.2	NM_006567	phenylalanyl-tRNA synthetase 2, mitochondrial
204327_s_at	1.01734	0.931159	0.68355	0.651999	ZNF202	N91520	Zinc finger protein 202
204317_at	0.92623	0.792083	0.514655	0.612561	GTSE1	BF305380	601892858F1 NIH_MGC_17 Homo sapiens cDNA clone IMAGE:4138335 5', mRNA sequence.
1557828_a_at	0.843147	0.700464	0.484375	0.605503	C5orf28	BE675061	Chromosome 5 open reading frame 28
1557830_at	1.00196	0.896178	0.582695	0.715504	FLJ10895	AW063658	CDNA FLJ10112 fis, clone HEMBA1002750
1558044_s_at	1.00249	0.837414	0.788646	0.618768	EXOSC6	BF692729	Exosome component 6
1558002_at	0.951222	0.910115	0.778015	0.549	STRAP	BQ944989	Serine/threonine kinase receptor associated protein
1557538_at	1.01709	0.693586	0.494365	0.653111		AI862062	tw71d02.x1 NCI_CGAP_Ut3 Homo sapiens cDNA clone IMAGE:2265123 3' similar to contains Alu repetitive element;contains element MER10 repetitive element ;, mRNA sequence.
1557580_at	0.996411	0.867597	0.434413	0.851236	CABIN1	BC027347	CDNA clone IMAGE:3923254
1557505_a_at	0.856114	0.82821	0.564964	0.674237	SRP54	AI076351	Full length insert cDNA YQ11E04
1557755_at	0.84217	0.520014	0.530159	0.716849	C14orf145	AW028337	Chromosome 14 open reading frame 145
1557737_s_at	0.984719	0.712723	0.493897	0.672066	NKTR	AI880383	at47h07.x1 Barstead colon HPLRB7 Homo sapiens cDNA clone IMAGE:2375197 3' similar to contains Alu repetitive element;, mRNA sequence.
1557738_at	1.15572	1.42385	0.634062	1.2179	RAB6IP2	BC041344	CDNA clone IMAGE:5272105
1558508_a_at	0.911719	0.845554	0.794594	0.525026	C1orf53	BI832220	Chromosome 1 open reading frame 53
1558467_a_at	0.93163	0.795542	0.604587	0.835838	MAP2	BE156619	Clone IMAGE:125405, mRNA sequence
1558445_at	0.870994	0.538553	0.648599	0.73596		AW827204	xn09d07.y1 NCI_CGAP_Li5 Homo sapiens cDNA clone IMAGE:2693197 5', mRNA sequence.
1558682_at	1.02757	0.845007	0.737417	0.591063	HMGA2	AI990940	High mobility group AT-hook 2
1558683_a_at	0.925522	0.706069	0.530138	0.518591	HMGA2	AI990940	High mobility group AT-hook 2
1558620_at	0.965685	0.792085	0.637169	0.689547	FLJ23786; FLJ45246; MGC126668; DKFZp686B11107	AK074366	zinc finger protein 621
1558220_at	1.09966	0.968663	0.537086	0.870344	LOC440993	BM914560	Hypothetical gene supported by AK128346
1558215_s_at	1.05476	1.03315	0.798177	0.544071	UBTF	AU145147	Upstream binding transcription factor, RNA polymerase I
1558292_s_at	0.951646	0.917063	0.604591	0.463219	PIGW	BF037819	Phosphatidylinositol glycan anchor biosynthesis, class W
1558251_a_at	0.907537	0.791721	0.584388	0.62756	ZF6; FLJ14710; FLJ20813	AK055448	zinc finger protein 587
1558249_s_at	1.05005	1.42419	1.36639	1.58208	STX16	BE878126	Syntaxin 16
1556416_s_at	1.09575	0.725091	0.472397	0.622927	SEC31L1	AF086242	Full length insert cDNA clone ZD37D10
1556321_a_at	1.07886	0.837496	0.625709	0.545735	MTERFD2	BQ184262	MRNA full length insert cDNA clone EUROIMAGE 283668
1556345_s_at	0.98024	1.1119	0.649286	0.961769	MCCC2	AF086534	Full length insert cDNA clone ZE07C03
1556568_a_at	0.965506	0.926401	0.519312	0.745546	NLK	N46436	Clone C4E 5.3 (CAC)n/(GTG)n repeat-containing mRNA
1556613_s_at	0.888044	0.833803	0.620621	0.627845	LOC203107	BC038568	hypothetical protein LOC203107
1556499_s_at	1.14107	1.01992	1.09178	1.74423	COL1A1	BE221212	hu22a05.x1 NCI_CGAP_Mel15 Homo sapiens cDNA clone IMAGE:3170768 3' similar to gb:K01228 PROCOLLAGEN ALPHA 1(I) CHAIN PRECURSOR (HUMAN);, mRNA sequence.
1556542_a_at	0.970314	0.749438	0.636923	0.667935	ANKMY2	AF086077	Full length insert cDNA clone YZ60H05
1556055_at	0.960639	0.850055	0.502849	0.746932	ATP11A	U90905	Clone 23574 mRNA sequence
1556088_at	1.1155	0.953277	0.651169	0.795347	OR11-177	AK098491	olfactory receptor, family 5, subfamily T, member 2
1556061_at	0.962279	0.688877	0.638816	0.723054	RPP30	AI760272	Ribonuclease P/MRP 30kDa subunit
1556063_s_at	0.904911	0.900689	0.763733	0.591431	RPP30	AW182934	Ribonuclease P/MRP 30kDa subunit
1556053_at	0.904918	0.82423	0.644046	0.69729	DNAJC7	AL556987	DnaJ (Hsp40) homolog, subfamily C, member 7
1556047_s_at	1.21642	1.49741	1.36798	1.4843	MAGEE1	AI298393	Melanoma antigen family E, 1
1556211_a_at	0.983733	1.01001	0.520211	0.896722		N62827	yy66f09.s1 Soares_multiple_sclerosis_2NbHMSP Homo sapiens cDNA clone IMAGE:278537 3', mRNA sequence.
1556226_at	0.979539	0.744381	0.468261	0.506204		R32470	yh38g03.s1 Soares placenta Nb2HP Homo sapiens cDNA clone IMAGE:132052 3' similar to contains Alu repetitive element;, mRNA sequence.
1557240_a_at	0.993569	0.815248	0.715309	0.517858	BBX	BU689085	Transcribed locus
1557252_at	0.952709	0.730996	0.599901	0.862358	DUSP6	AK093532	CDNA FLJ36213 fis, clone THYMU2000671
1557238_s_at	0.928619	0.64468	0.475146	0.730444	SETD5	BQ446762	Transcribed locus
1557409_at	0.862937	0.754839	0.502617	0.680814		CA313226	UI-CF-FN0-aex-p-22-0-UI.s1 UI-CF-FN0 Homo sapiens cDNA clone UI-CF-FN0-aex-p-22-0-UI 3', mRNA sequence.
1557372_at	0.968197	0.659321	0.638753	0.675873	FLJ41757	AF086285	Hypothetical gene supported by AF086285; AK123751
1557384_at	0.967772	0.873425	0.540432	0.555418	ZNF131	AL832081	Zinc finger protein 131
1557432_at	1.0434	0.770108	0.582658	0.814532	RASAL2	BQ003426	Transcribed locus
1557418_at	1.05234	0.84923	0.57069	1.03301	ACSL4	W95007	Acyl-CoA synthetase long-chain family member 4
1557419_a_at	0.835372	0.740589	0.607589	0.638459	ACSL4	W95007	Acyl-CoA synthetase long-chain family member 4
1557315_a_at	1.07002	1.37928	0.955541	1.49244	PAPPA	AL134420	CDNA FLJ39920 fis, clone SPLEN2020166
1557360_at	1.10383	0.929834	0.522066	0.669272	LRPPRC	CA430402	Transcribed locus
1557350_at	1.0696	0.913353	0.633286	0.589816	G3BP	AA026297	Transcribed locus
1556942_at	0.864987	0.726177	0.498113	0.691408	KIAA1126	AL832732	MRNA; cDNA DKFZp686E0813 (from clone DKFZp686E0813)
1556728_at	0.9633	0.762596	0.600893	0.64522		T92265	ye18g03.s1 Stratagene lung (#937210) Homo sapiens cDNA clone IMAGE:118132 3', mRNA sequence.
1562163_at	0.94182	0.792669	0.474152	0.494363	NUSAP1	AF085923	Full length insert cDNA clone YR43F03
1562391_at	0.941027	0.687603	0.496148	0.634681	B3GALNT2	AK091497	Beta-1,3-N-acetylgalactosaminyltransferase 2
1561973_at	1.00018	1.0827	0.591495	0.730149	SMARCC2	AL833124	SWI/SNF related, matrix associated, actin dependent regulator of chromatin, subfamily c, member 2
1562062_at	1.00902	0.853433	0.55596	0.829447		BM041211	Transcribed locus
1562063_x_at	1.0219	0.936857	0.640564	0.890639		BM041211	Transcribed locus
1562033_at	0.983819	0.828754	0.626914	0.786152	KTN1	BC041918	CDNA clone IMAGE:5300069
1562948_at	1.13802	0.951133	0.55752	0.768039	KREMEN1	BC035661	Homo sapiens, clone IMAGE:5722724, mRNA
1563051_at	0.84181	0.594097	0.712509	0.612279	OSBP1	BC017975	oxysterol binding protein
1563075_s_at	0.958896	0.885215	0.388776	0.829994	ZC3HAV1	AF143866	Clone IMAGE:110987 mRNA sequence
1562454_at	1.03164	0.740357	0.380861	0.648184	TCF7L2	AL832684	MRNA; cDNA DKFZp313B1634 (from clone DKFZp313B1634)
1560926_at	1.02667	0.766307	0.575446	0.71081	AFF4	AF085924	Full length insert cDNA clone YR43G06
1561048_at	1.22601	1.45687	1.14046	1.22088	RARSL; DALRD2; PRO1992; MGC14993; MGC23778; dJ382I10.6	AF143874	arginyl-tRNA synthetase 2, mitochondrial (putative)
1560637_at	1.0251	0.827679	0.648022	0.689979	LOC255654	BC039537	CDNA clone IMAGE:5744875
1561855_x_at	0.923012	0.54627	0.658739	0.776225		AY034469	Clone BGL1 mRNA sequence
1561190_at	0.946102	1.04333	0.58094	0.842451	NKIAMRE	AF087989	cyclin-dependent kinase-like 3
1561195_at	1.02873	0.893963	0.466659	0.890665	TM7SF1	AL832142	MRNA; cDNA DKFZp686A22111 (from clone DKFZp686A22111)
1564907_s_at	0.826435	0.868322	0.734568	0.598475	U19H	AJ224167	small nucleolar RNA host gene (non-protein coding) 4
1564906_at	1.02206	0.756316	0.534271	0.42499	U19H	AJ224167	small nucleolar RNA host gene (non-protein coding) 4
1564520_s_at	1.01623	0.970827	0.833493	0.624859	JBP1; SKB1; IBP72; SKB1Hs; HRMT1L5	AK027737	protein arginine methyltransferase 5
1565689_at	0.95574	0.978921	0.470918	0.731795		BG400570	602464219F1 NIH_MGC_75 Homo sapiens cDNA clone IMAGE:4592261 5', mRNA sequence.
1565762_at	0.958483	0.697739	0.484	0.70328		AK074233	CDNA FLJ23653 fis, clone COL10079
1565743_at	0.936442	0.729374	0.524179	0.814595	PRKCSH	BG545582	Homo sapiens, clone IMAGE:4418644, mRNA
1565620_at	0.873735	0.670745	0.489782	0.616171	CTGLF1	BG621044	Centaurin, gamma-like family, member 1
1563468_at	0.929023	0.916977	0.532458	0.741837	ZAK	AL833307	MRNA; cDNA DKFZp451O249 (from clone DKFZp451O249)
1563130_a_at	1.01493	0.853105	0.558816	0.595891	PAX5	AL109710	MRNA full length insert cDNA clone EUROIMAGE 626063
1564164_at	1.07265	0.708782	0.538343	0.760911	FLJ20054; DKFZp547O0715	AL831839	hypothetical protein FLJ20054
1564220_a_at	0.918926	0.76004	0.583231	0.577803	GNA12	AK096932	CDNA FLJ39613 fis, clone SKNSH2009357
1563781_at	1.0088	0.848032	0.661979	0.696981	LOC285949	AK096687	hypothetical protein LOC285949
1559139_at	1.00781	1.08446	0.57423	0.768345	NIR; FLJ35172; DKFZP564C186	BC009786	nucleolar complex associated 2 homolog (S. cerevisiae)
1559038_at	0.936599	1.02385	0.639733	0.811769	DIFF6; NEDD5; Pnutl3; hNedd5; KIAA0158	BC043180	septin 2
1559039_at	1.11885	1.17945	0.657811	0.70662	DHX36	AK096808	DEAH (Asp-Glu-Ala-His) box polypeptide 36
1559044_at	1.00628	0.871485	0.587417	0.783024	p13; CSL4; SKI4; Csl4p; Ski4p; hCsl4p; CGI-108; RP11-452K12.9	BC012538	exosome component 1
1559401_a_at	1.02808	0.792497	0.499239	0.802635	TIMM17B	BI052176	CDNA clone IMAGE:5267013
1559382_at	1.02263	1.04797	0.736179	0.598143	CRSP7	BC000817	Cofactor required for Sp1 transcriptional activation, subunit 7, 70kDa
1559391_s_at	1.12663	0.881235	0.59501	0.707132	B2M	AI084451	Partial mRNA; ID EE2-8E
1559436_x_at	0.973273	0.921639	0.647727	0.926738	ARRB2	AL832061	MRNA; cDNA DKFZp313M2114 (from clone DKFZp313M2114)
1559332_at	0.998329	0.869351	0.54591	0.741169	CRIM1	BC016339	Homo sapiens, clone IMAGE:4108653, mRNA
1559490_at	1.03446	0.941319	0.487337	0.887302	LRCH3	AL832278	Leucine-rich repeats and calponin homology (CH) domain containing 3
1558791_at	0.889477	0.72684	0.423694	0.571305	LOC286467	BC038558	Hypothetical protein LOC286467
1558750_a_at	1.02111	0.657242	0.601714	0.73956		BG109249	CDNA FLJ34964 fis, clone NTONG2004095
1558937_s_at	1.02191	0.584864	0.658536	0.808919		AL711520	DKFZp686E1983_r1 686 (synonym: hlcc3) Homo sapiens cDNA clone DKFZp686E1983 5', mRNA sequence.
1558922_at	1.15466	1.15767	0.606542	0.966366	EFEMP1	CA776505	Full length insert cDNA clone YF43G08
1560145_at	0.961515	0.800076	0.632848	0.811805	MKLN1	BQ942131	Muskelin 1, intracellular mediator containing kelch motifs
1560297_at	0.96581	0.88611	0.575982	0.746793		BG928538	HNC68-1-D7.R HNC (Human Normal Cartilage) Homo sapiens cDNA, mRNA sequence.
1560274_at	0.920893	0.725489	0.647008	0.926998	WTAP	BF679507	Wilms tumor 1 associated protein
1560082_at	0.953017	1.04499	0.469754	0.767453	FYB	AL833239	MRNA; cDNA DKFZp761L0119 (from clone DKFZp761L0119)
1560101_at	1.18475	1.45412	1.63817	2.03703	FLJ13815; RP11-33E12.1	AL834286	synapse defective 1, Rho GTPase, homolog 2 (C. elegans)
1560622_at	0.944049	0.835225	0.488804	0.595101	KIAA0515	AK000203	CDNA FLJ20196 fis, clone COLF0944
1560303_at	0.876781	0.902543	0.701189	0.524028	FKBP4	W25881	16b7 Human retina cDNA randomly primed sublibrary Homo sapiens cDNA, mRNA sequence.
1560402_at	0.892835	0.842295	0.647883	0.643841	GAS5	BF336936	Growth arrest-specific 5
1560342_at	0.926029	0.703677	0.465448	0.631153	ARSB	BC036606	CDNA clone IMAGE:5275043
1564308_a_at	1.47141	1.75358	2.09629	1.92337	FLJ32798; RP11-218D6.5	AK057360	membrane protein, palmitoylated 7 (MAGUK p55 subfamily member 7)
1559681_a_at	0.889507	0.926922	0.642104	0.765861	TRIM16L	BC021296	Tripartite motif-containing 16-like
1559739_at	0.943994	0.954264	0.625615	0.990052	CHPT1	AK025141	Choline phosphotransferase 1
1559023_a_at	0.830668	0.938447	0.636791	0.85562	ATPAF1	AL832653	ATP synthase mitochondrial F1 complex assembly factor 1
1559529_at	0.992637	0.885892	0.4883	0.631737	FAK; FADK; FAK1; pp125FAK	BC043202	PTK2 protein tyrosine kinase 2
1559964_at	0.978587	0.794481	0.339879	0.546389	FLJ38717; FLJ40915	AK096036	FLJ38717 protein
1559993_at	0.905872	0.823756	0.564628	0.76157	SFXN3	AK091504	Sideroflexin 3
1559822_s_at	0.973575	0.765082	0.788712	0.65922	LOC644215	BC009463	Hypothetical LOC644215
1553909_x_at	0.920772	0.847194	0.590303	0.839467	C10orf6	NM_144592	chromosome 10 open reading frame 6
1553954_at	0.963283	0.941297	0.838418	0.601108	ALG14	BU682208	Asparagine-linked glycosylation 14 homolog (S. cerevisiae)
1553400_a_at	1.13246	1.33282	1.4805	1.62262	FLJ25168	NM_152466	chromosome 17 open reading frame 69
1553542_at	0.957387	0.700055	0.620977	0.538349	KENAE	NM_176816	coiled-coil domain containing 125
1553535_a_at	0.873145	0.743556	0.593369	0.641232	SD; Fug1; KIAA1835; MGC20266	NM_002883	Ran GTPase activating protein 1
1553685_s_at	1.18845	1.35828	1.566	1.10329	SP1	NM_138473	Sp1 transcription factor
1553689_s_at	0.988542	0.983776	0.699987	0.636085	MGC24132	NM_152396	methyltransferase like 6
1553575_at	0.998723	1.10742	0.945095	0.532989	MTND6	NM_173714	NADH dehydrogenase, subunit 6 (complex I); go_component: mitochondrial electron transport chain [goid 0005746] [evidence P] [pmid 9878551]; go_component: NADH dehydrogenase complex (ubiquinone) (sensu Eukarya) [goid 0005748] [evidence IEA]; go_component: mitochondrion [goid 0005739] [evidence IEA]; go_component: respiratory chain complex I (sensu Eukarya) [goid 0005747] [evidence NAS]; go_functio…
1553587_a_at	0.914374	0.737437	0.698007	0.631946	p12	NM_019896	polymerase (DNA-directed), epsilon 4 (p12 subunit)
1553613_s_at	0.89432	0.725892	0.53158	0.692897	ARA; IGDA; IHG1; FKHL7; IRID1; FREAC3	NM_001453	forkhead box C1
1554155_at	0.981359	0.742763	0.663293	0.661728	MCT; BRIT1; FLJ12847	BC030702	microcephaly, primary autosomal recessive 1
1554171_at	1.1302	0.7627	0.660973	0.566884	MYM; XFIM; ZNF261; DXS6673E; KIAA0385; ZNF198L2	BC013009	zinc finger, MYM-type 3
1554177_a_at	0.817337	0.872111	0.578473	0.627332	ATPW; HSU79253	BC011549	ATP synthase, H+ transporting, mitochondrial F0 complex, subunit s (factor B)
1554241_at	0.826713	0.610774	0.708437	0.727627	DFNA9; DFNA31; COCH5B2; COCH-5B2	BC007230	coagulation factor C homolog, cochlin (Limulus polyphemus)
1554250_s_at	0.864001	0.61551	0.82975	0.879518	TRIM50B; MGC45477	BC033812	tripartite motif-containing 73
1554251_at	0.865799	0.748908	0.596739	0.596955	HP1-BP74	BC022342	Homo sapiens cDNA clone MGC:23782 IMAGE:4248265, complete cds.
1554085_at	1.06622	1.10209	0.73219	0.595397	MGC42193; DKFZp686N2081	BC012461	DEAD (Asp-Glu-Ala-Asp) box polypeptide 51
1554080_at	1.02306	0.791632	0.647266	0.587569	RCD1; CNOT9; RCD1+	BC007102	RCD1 required for cell differentiation1 homolog (S. pombe)
1554057_at	0.912266	1.11511	0.653626	0.769183	LOC645676; FLJ44595	BC017347	hypothetical LOC645676
1554067_at	0.868446	0.576431	0.824768	0.692132	FLJ32549	BC036246	hypothetical protein FLJ32549
1552536_at	1.04472	0.625728	0.285928	0.413971	MVti1; Vti1-rp2	NM_145206	vesicle transport through interaction with t-SNAREs homolog 1A (yeast)
1552477_a_at	1.02558	1.30912	1.27043	1.76096	LPS; PIT; PPS; VWS; OFC6	BC014852	interferon regulatory factor 6
1552641_s_at	0.962918	0.914058	0.740106	0.610251	TOB3; KIAA1273	NM_031921	ATPase family, AAA domain containing 3B
1552622_s_at	0.995632	0.989933	0.66462	0.93879	POLR2J4	BQ613856	Polymerase (RNA) II (DNA directed) polypeptide J, 13.3kDa pseudogene
1552287_s_at	1.01299	0.894554	0.624662	0.58091	AFG3L1	NM_001132	AFG3 ATPase family gene 3-like 1 (yeast)
1552306_at	0.883104	0.745217	0.554978	0.536508	KCR1; FLJ14751	BC033730	asparagine-linked glycosylation 10 homolog (yeast, alpha-1,2-glucosyltransferase)
1552378_s_at	1.10796	1.76361	1.30521	1.09435	RDH10	NM_172037	retinol dehydrogenase 10 (all-trans)
1552330_at	1.01129	0.81393	0.651222	0.783586	MGC16385; FLJ23771; FLJ31569; MGC13198	NM_145039	hypothetical protein MGC16385
1552312_a_at	1.13858	1.51805	1.13765	0.949987	MFAP3	NM_005927	microfibrillar-associated protein 3
1552362_a_at	0.815367	0.757945	0.799508	0.625306	LEAP-2	NM_052971	liver expressed antimicrobial peptide 2
1552343_s_at	0.914423	0.734362	0.610349	0.816927	HCP1; PDE7	NM_002604	phosphodiesterase 7A
1553107_s_at	0.911251	0.900992	0.669731	0.523061	C5orf24	BF436799	Chromosome 5 open reading frame 24
1553048_a_at	0.818433	1.00882	0.798366	0.561645	PIP5K2B	NM_138687	phosphatidylinositol-4-phosphate 5-kinase, type II, beta
1553185_at	0.930165	0.685038	1.47773	0.785085	RAB45; FLJ31614	NM_152573	RAS and EF-hand domain containing
1553145_at	0.876056	0.591112	0.642161	0.825798	FLJ39653	BC010030	hypothetical FLJ39653
1553165_at	0.88213	0.735016	0.514497	0.584993	AP1GBP1	NM_080551	AP1 gamma subunit binding protein 1; synonyms: SYNG, MGC104959; isoform 2 is encoded by transcript variant 2; gamma-synergin; adaptor-related protein complex 1 gamma subunit-binding protein 1; Homo sapiens AP1 gamma subunit binding protein 1 (AP1GBP1), transcript variant 2, mRNA.
1552729_at	1.06418	0.926112	0.664529	0.652388	MGC16037	NM_032887
1552792_at	0.943538	0.951934	0.997914	0.607246	SOCS7; DKFZp686J1568	NM_080867	suppressor of cytokine signaling 4
1552711_a_at	0.978328	1.02055	0.741089	0.597129	FLJ32499	NM_144607	cytochrome b5 domain containing 1
1552867_at	0.926757	0.592622	0.529453	0.73545		NM_138474
1555594_a_at	1.28464	1.3079	1.63907	1.25757	EXP; MBNL; EXP35; EXP40; EXP42; KIAA0428; DKFZp686P06174	AF401998	muscleblind-like (Drosophila)
1555561_a_at	0.907634	0.729278	1.01927	0.651719	HUGT2; FLJ10873; FLJ11485; MGC87276; MGC117360; MGC150689	BC032302	UDP-glucose ceramide glucosyltransferase-like 2
1555733_s_at	1.25721	1.52088	1.27538	1.06384	AP1S3	AF393369	adaptor-related protein complex 1, sigma 3 subunit
1555673_at	1.14667	1.24494	1.07427	1.83074	KAP2.1A; KRTAP2.1A	BC012486	keratin associated protein 2-1
1555388_s_at	0.988206	0.901342	0.606674	1.08514	SBBI31; MSTP043; FLJ23161	BC029868	sorting nexin 25
1555434_a_at	1.19512	1.92315	1.58299	1.46987	ZIP14; cig19; LZT-Hs4; KIAA0062	BC015770	solute carrier family 39 (zinc transporter), member 14
1555420_a_at	0.929771	0.684948	0.612893	0.858575	UKLF	BC012919	Kruppel-like factor 7 (ubiquitous)
1555427_s_at	0.982253	0.949975	0.764523	0.584402	pp68; NSAP1; HNRPQ1; GRY-RBP; dJ3J17.2; RP1-3J17.2	AY034482	synaptotagmin binding, cytoplasmic RNA interacting protein
1555920_at	0.9433	0.727254	0.490827	0.561949	CBX3	BU683892	Chromobox homolog 3 (HP1 gamma homolog, Drosophila)
1555910_at	0.888316	0.648343	0.713514	0.658456	FLJ12598	AK056761	pentatricopeptide repeat domain 2
1555943_at	0.995758	1.09832	0.829146	0.589681	PGAM5	CA307621	Phosphoglycerate mutase family member 5
1555945_s_at	0.916211	0.778339	0.645001	0.634824	C9orf10; DNAPTP1; DNAPTP5; MGC111527; MGC133257	AK091785	family with sequence similarity 120A
1555981_at	0.899878	1.16354	1.10401	1.55022	MGC119234; DKFZp762C2414	AK055685	chromosome 17 open reading frame 65
1555978_s_at	0.995292	1.06998	0.808107	0.575118	MRCL3	AW467415	CDNA FLJ33153 fis, clone UTERU2000332
1555960_at	0.992138	0.884035	0.65012	0.642762	HINT1	AK054976	Histidine triad nucleotide binding protein 1
1555823_at	1.13971	1.35918	1.82728	1.53214		AK098354	CDNA FLJ25488 fis, clone CBR00232
1555781_at	0.872143	0.811796	0.626699	0.932155	FLJ20320; FLJ23906; FLJ26661; FLJ26665; RP4-657E11.5	BC015324	PQ loop repeat containing 2
1555831_s_at	1.04589	0.892684	0.634337	0.683142	MUF1	BC004948	Homo sapiens cDNA clone IMAGE:3616550, **** WARNING: chimeric clone ****.
1555841_at	0.931551	0.910218	0.727167	0.627617	C9orf30	BQ014020	Chromosome 9 open reading frame 30
1554522_at	0.989419	0.879922	0.537904	0.731162	ACDP2	BC021222	cyclin M2
1554549_a_at	0.95774	0.80669	0.859825	0.611366	DMR; FLJ33659; MGC33177; MGC33183	BC030654	WD repeat domain 20
1554480_a_at	0.909534	0.812322	0.654165	0.534821	SVH; MGC3195; PNAS-112	AY150851	armadillo repeat containing 10
1554597_at	0.996155	0.948707	0.639635	0.771637		BC016767	Homo sapiens cDNA clone IMAGE:4077665, **** WARNING: chimeric clone ****.
1554638_at	0.960418	0.816124	0.576667	0.902107	ENDOFIN; KIAA0305; DKFZp686E13162	BC032227	zinc finger, FYVE domain containing 16
1554572_a_at	0.936617	0.880693	0.669125	0.636387	FLJ23414	BC029360	suppressor of variegation 3-9 homolog 2 (Drosophila)
1554415_at	0.956296	1.00108	0.686053	0.505309	PAF65B	BC041094	TAF5-like RNA polymerase II, p300/CBP-associated factor (PCAF)-associated factor, 65kDa
1555039_a_at	1.217	1.62215	1.74914	1.20151	MRP4; MOATB; MOAT-B; EST170205	AY133679	ATP-binding cassette, sub-family C (CFTR/MRP), member 4
1555122_at	0.972594	0.923361	1.02214	0.563021	PGR21; TEM5L	BC026009	G protein-coupled receptor 125
1555106_a_at	1.20381	1.41155	1.69644	1.23373	HSPC058; HSPC129; FLJ10523	BC035744	CTD (carboxy-terminal domain, RNA polymerase II, polypeptide A) small phosphatase like 2
1555266_a_at	1.06178	1.4885	1.53429	1.35344	ASXH2; FLJ10898; KIAA1685; DKFZp686C1968	BC042999	additional sex combs like 2 (Drosophila)
1555274_a_at	0.967709	1.01616	0.848609	0.595866	SELI; KIAA1724	BC021229	selenoprotein I
1555240_s_at	0.914468	0.831609	0.92213	0.64228	FLJ31352; FLJ34695	AF493879	guanine nucleotide binding protein (G protein), gamma 12
1554771_at	1.12501	1.05424	0.605935	0.812234		BC008846	CDNA clone IMAGE:4300887
1554678_s_at	0.9506	0.907171	0.909577	0.555196	HNRNP; JKTBP; JKTBP2; laAUF1	AB066484	heterogeneous nuclear ribonucleoprotein D-like
1554852_a_at	1.02987	1.25281	1.60627	1.19561	KIAA1257	BC031632	KIAA1257
1554841_at	1.01348	0.89404	0.57953	0.659129	FLJ13105; MGC45532; MGC72244	BC032771	methylenetetrahydrofolate dehydrogenase (NADP+ dependent) 2-like
1554890_a_at	0.977195	1.03911	0.823905	0.591161	TIA1	BC015944	TIA1 cytotoxic granule-associated RNA binding protein
1554894_a_at	0.94705	0.868348	0.70677	0.50306	PHS2; DCOH2; DCOHM	AF499009	pterin-4 alpha-carbinolamine dehydratase/dimerization cofactor of hepatocyte nuclear factor 1 alpha (TCF1) 2
1554790_at	0.916301	0.703926	0.555958	0.519337	KOX29; ZNF31; ZFP-31; ZNF360	BC011404	zinc finger and SCAN domain containing 20
201291_s_at	0.988825	0.628795	0.929029	1.00414	TOP2A	AU159942	Topoisomerase (DNA) II alpha 170kDa
201316_at	0.959431	0.835428	0.749525	0.642858	PSMA2	AL523904	Proteasome (prosome, macropain) subunit, alpha type, 2
201327_s_at	0.955207	0.89048	0.750152	0.661685	CCT6; Cctz; HTR3; TCPZ; TCP20; MoDP-2; TTCP20; CCT-zeta; MGC126214; MGC126215; CCT-zeta-1; TCP-1-zeta	NM_001762	chaperonin containing TCP1, subunit 6A (zeta 1)
201323_at	1.02854	1.02828	0.749006	0.609094	P40; EBP2; NOBP	NM_006824	EBNA1 binding protein 2
201305_x_at	1.05942	1.01637	0.760081	0.596722	ANP32B	AV712577	AV712577 DCA Homo sapiens cDNA clone DCAAUH03 5', mRNA sequence.
201313_at	0.980409	1.04033	0.82388	1.37958	NSE	NM_001975	enolase 2 (gamma, neuronal)
201246_s_at	0.99476	0.969083	0.836547	0.651743	OTB1; OTU1; HSPC263; MGC4584; FLJ20113; FLJ40710; MGC111158	NM_017670	OTU domain, ubiquitin aldehyde binding 1
201232_s_at	0.969431	0.907517	0.692655	0.654443	p40.5; HSPC027	NM_002817	proteasome (prosome, macropain) 26S subunit, non-ATPase, 13
201404_x_at	0.924009	1.23947	1.52286	0.890558	HC7-I; MGC104215; MGC126885	BC000268	proteasome (prosome, macropain) subunit, beta type, 2
201382_at	0.754103	0.873183	1.15449	0.636762	SIP; GIG5; MGC87971; PNAS-107; S100A6BP; RP1-102G20.6	NM_014412	calcyclin binding protein
201394_s_at	0.948847	0.710937	0.588093	0.67911	G15; H37; RMB5; LUCA15; FLJ39876	U23946	RNA binding motif protein 5
201420_s_at	0.959995	0.906815	0.709463	0.583449	WDR77	BF975273	WD repeat domain 77
201421_s_at	0.981674	0.843581	0.617546	0.698086	MEP50; MGC2722; HKMT1069; Nbla10071; RP11-552M11.3	NM_024102	WD repeat domain 77
201422_at	0.855836	0.854239	0.692164	0.645511	GILT; IP30; IFI-30; MGC32056	NM_006332	interferon, gamma-inducible protein 30
201427_s_at	0.726761	0.749144	0.958119	1.43234	SeP; SELP	NM_005410	selenoprotein P, plasma, 1
201418_s_at	0.963809	0.711584	0.629523	0.738519	EVI16	NM_003107	SRY (sex determining region Y)-box 4
201419_at	0.94217	0.820249	0.802538	0.654026	hucep-6; FLJ35406; FLJ37180; HUCEP-13; KIAA0272; DKFZp686N04275	NM_004656	BRCA1 associated protein-1 (ubiquitin carboxy-terminal hydrolase)
201330_at	1.00054	0.918764	0.677963	0.524143	ArgRS; DALRD1; MGC8641	NM_002887	arginyl-tRNA synthetase
201373_at	0.880472	0.831618	0.593121	0.838431	HD1; PCN; EBS1; EBSO; PLTN; PLEC1b	NM_000445	plectin 1, intermediate filament binding protein 500kDa
201377_at	0.949004	0.950336	0.809295	0.603494	NICE-4; FLJ42300; KIAA0144	NM_014847	ubiquitin associated protein 2-like
201086_x_at	0.997957	0.932608	0.726931	0.608804	SON	NM_003103	SON DNA binding protein
201087_at	0.915651	0.831979	0.589305	0.706413	FLJ16691	NM_002859	paxillin
201068_s_at	1.02561	0.857358	0.756278	0.630434	S7; MSS1; MGC3004; Nbla10058	NM_002803	proteasome (prosome, macropain) 26S subunit, ATPase, 2
201070_x_at	0.976456	0.839886	0.798257	0.606054	SF3B1	AI739389	Splicing factor 3b, subunit 1, 155kDa
201080_at	0.948316	0.788926	0.642963	0.704311	PIP5K2B	BF338509	Phosphatidylinositol-4-phosphate 5-kinase, type II, beta
201043_s_at	1.02112	0.905402	0.748029	0.653989	LANP; MAPM; PP32; PHAP1; PHAPI; I1PP2A; C15orf1; MGC119787; MGC150373	NM_006305	acidic (leucine-rich) nuclear phosphoprotein 32 family, member A
201052_s_at	0.9675	0.905451	0.716464	0.642028	PSMF1	BG029917	Proteasome (prosome, macropain) inhibitor subunit 1 (PI31)
201195_s_at	1.0399	0.964822	0.693307	0.587212	E16; CD98; LAT1; 4F2LC; MPE16; hLAT1; D16S469E	AB018009	solute carrier family 7 (cationic amino acid transporter, y+ system), member 5
201197_at	0.982865	0.785491	0.648433	0.685602	AMD; ADOMETDC; FLJ26964; DKFZp313L1234	NM_001634	adenosylmethionine decarboxylase 1
201182_s_at	0.98055	0.80255	0.78995	0.601208	CHD4	AI761771	Chromodomain helicase DNA binding protein 4
201210_at	0.999653	0.924732	0.797564	0.664689	DBX; DDX3; HLP2; DDX14	NM_001356	DEAD (Asp-Glu-Ala-Asp) box polypeptide 3, X-linked
201140_s_at	1.00046	0.878172	0.703494	0.647125	RABL; RAB5CL; MGC117217; MGC138857	NM_004583	RAB5C, member RAS oncogene family
201141_at	0.987338	0.962631	0.631678	0.742581	NMB; HGFIN	NM_002510	glycoprotein (transmembrane) nmb
201156_s_at	0.969455	0.886802	0.697989	0.645477	RABL; RAB5CL; MGC117217; MGC138857	AF141304	RAB5C, member RAS oncogene family
201715_s_at	0.929413	0.897942	0.721892	0.648647	ACN; ACINUS; KIAA0670; DKFZp667N107	NM_014977	apoptotic chromatin condensation inducer 1
201693_s_at	1.00884	0.649248	0.814393	0.900784	EGR1	AV733950	Early growth response 1
201702_s_at	0.910049	0.622891	0.506543	0.545754	PPP1R10	AI492873	Protein phosphatase 1, regulatory (inhibitor) subunit 10
201703_s_at	0.904531	0.545744	0.507239	0.661466	FB19; CAT53; PNUTS	NM_002714	protein phosphatase 1, regulatory (inhibitor) subunit 10
201725_at	0.957028	0.956417	0.736031	0.637273	D123; C10orf7	NM_006023	cell division cycle 123 homolog (S. cerevisiae)
201679_at	0.98623	1.05172	0.851282	0.572425	ARS2	BE646076	ARS2 protein
201680_x_at	0.971175	0.949927	0.743704	0.624862	ARS2; ASR2; MGC126427	NM_015908	ARS2 protein
201667_at	1.72579	1.41439	1.56876	1.49796	CX43; GJAL; ODDD; DFNB38	NM_000165	gap junction protein, alpha 1, 43kDa
201813_s_at	0.989445	0.882988	0.657405	0.657698	TBC1D5	AI654161	TBC1 domain family, member 5
201818_at	0.827233	0.690078	0.461245	0.573657	lpcat; LPCAT1; PFAAP3; FLJ12443	NM_024830	acyltransferase like 2
201841_s_at	0.983293	0.935927	0.663999	0.606693	CMT2F; HSP27; HSP28; Hsp25; HS.76067; DKFZp586P1322	NM_001540	heat shock 27kDa protein 1
201767_s_at	0.975194	0.953143	0.730601	0.610375	ELC2; HPC2; FLJ10530; FLJ36693; FLJ42848	NM_018127	elaC homolog 2 (E. coli)
201755_at	0.969753	1.03206	0.790973	0.519538	CDC46; MGC5315; P1-CDC46	NM_006739	minichromosome maintenance complex component 5
201491_at	1.00457	0.811315	0.689718	0.609791	p38; AHA1; C14orf3	NM_012111	AHA1, activator of heat shock 90kDa protein ATPase homolog 1 (yeast)
201487_at	1.01535	0.897664	0.850514	0.601742	JP; HMS; JPD; PLS; CPPI; DPP1; DPPI; PALS	NM_001814	cathepsin C
201498_at	0.969008	0.873398	0.715761	0.622087	USP7	AI160440	Ubiquitin specific peptidase 7 (herpes virus-associated)
201516_at	0.977223	0.903027	0.741897	0.571979	PAPT; SPS1; SPDSY; SRML1	NM_003132	spermidine synthase
201434_at	0.932877	0.840185	0.70796	0.638836	TPR1	NM_003314	tetratricopeptide repeat domain 1
201478_s_at	0.965525	0.992896	0.723123	0.62553	DKC; NAP57; NOLA4; XAP101; dyskerin	U59151	dyskeratosis congenita 1, dyskerin
201474_s_at	0.843434	0.779336	0.660883	0.932878	VL3A; CD49C; GAPB3; MSK18; VCA-2; VLA3a; GAP-B3; FLJ34631; FLJ34704	NM_002204	integrin, alpha 3 (antigen CD49C, alpha 3 subunit of VLA-3 receptor)
201466_s_at	0.845311	0.928531	1.07051	1.63702	AP1; c-Jun	NM_002228	jun oncogene
201471_s_at	0.994827	0.91705	0.847044	0.647832	p60; p62; A170; OSIL; PDB3; ZIP3; p62B	NM_003900	sequestosome 1
201468_s_at	0.966447	0.941361	0.656716	0.437779	DTD; QR1; DHQU; DIA4; NMOR1; NMORI	NM_000903	NAD(P)H dehydrogenase, quinone 1
201607_at	0.983447	0.96561	0.769802	0.660586	PWP1	AI694451	PWP1 homolog (S. cerevisiae)
201608_s_at	0.979824	0.941257	0.718902	0.582192	IEF-SSP-9502	NM_007062	PWP1 homolog (S. cerevisiae)
201606_s_at	0.993216	0.866173	0.742784	0.618001	PWP1	BE796924	PWP1 homolog (S. cerevisiae)
201632_at	0.996675	0.915285	0.794034	0.60093	EIF2B; EIF-2B; EIF2BA; MGC117409; MGC125868; MGC125869; EIF-2Balpha	NM_001414	eukaryotic translation initiation factor 2B, subunit 1 alpha, 26kDa
201586_s_at	1.03416	0.966602	0.752009	0.640241	PSF; POMP100	NM_005066	splicing factor proline/glutamine-rich (polypyrimidine tract binding protein associated)
1570243_at	1.06051	0.768141	0.668325	0.58575	LOC440731	BC013633	Hypothetical LOC440731
1570249_x_at	0.876414	0.80949	0.546714	0.61094	GNB1	BC031345	Homo sapiens, clone IMAGE:5440470, mRNA
1598_g_at	1.22579	1.21737	1.13277	1.42709	AXSF; AXLLG; FLJ34709; DKFZp666G247	L13720	growth arrest-specific 6
1569666_s_at	0.896361	0.67027	0.611853	0.78335	SLC37A3	BC035773	Homo sapiens, clone IMAGE:5581630, mRNA
1569706_at	0.901562	0.74863	0.486933	0.831223	MYSM1	BC017579	Myb-like, SWIRM and MPN domains 1
1569555_at	0.986834	0.818364	0.659329	0.846693	CYPIN; GUANASE; MGC9982; NEDASIN; KIAA1258	BC012859	guanine deaminase
1569527_at	1.05051	1.0388	0.425358	0.712507	PLAT	BC017275	CDNA clone IMAGE:4842907
1569538_at	1.01854	0.903296	0.424113	0.672489		AF130084	Clone FLB8310 PRO2225
1569540_at	0.8505	0.756481	0.57833	0.560561		BC035958	Homo sapiens, clone IMAGE:4722681, mRNA.
1569999_at	1.16011	0.943551	0.559512	0.632043	TTLL3	BC036316	CDNA clone IMAGE:4837159
1570020_at	1.04481	0.757146	0.61023	0.623698	AACSL	BC024222	acetoacetyl-CoA synthetase-like
1570151_at	1.0843	0.801256	0.632024	0.852165	TGFBI	BC013779	Homo sapiens, clone IMAGE:4340670, mRNA
1570120_at	0.922792	0.781135	0.600969	0.93595		BC024027	CDNA clone IMAGE:4824334
1569940_at	0.907967	0.912847	0.65088	0.847271	SLC6A16	BC039336	Solute carrier family 6, member 16
200083_at	0.922902	0.72648	0.646712	0.677134	USP22	AA621731	Ubiquitin specific peptidase 22
200601_at	0.937267	0.792193	0.613868	0.732483	FSGS; FSGS1; DKFZp686K23158	U48734	actinin, alpha 4
200593_s_at	1.01693	1.07428	0.792218	0.6396	SAF-A; U21.1; HNRNPU	BC003621	heterogeneous nuclear ribonucleoprotein U (scaffold attachment factor A)
1567575_at	0.828366	0.690942	0.63657	0.877578	BDNF	AJ011601	Trapped 3' terminal exon, clone C2C4
1567224_at	1.03755	0.842338	0.507979	0.663873	BABL; LIPO; HMGIC; HMGI-C	U29113	high mobility group AT-hook 2
1567703_at	0.957809	0.676738	1.78099	0.915685		U55185	Human oral cancer candidate gene mRNA, clone T9, 3' end.
1567997_x_at	0.894671	0.740814	0.669007	0.582641		D17262	D17262 Kiseru Homo sapiens cDNA clone hmd5f04m3, mRNA sequence.
1568594_s_at	1.00658	0.638877	0.628333	0.642424	TRIM52	AW965171	Tripartite motif-containing 52
1568619_s_at	0.790574	0.722006	0.668807	0.606642	LOC162073; FLJ22994; MGC126798; MGC126800	BC015343	hypothetical protein LOC162073
1566113_at	0.986646	0.670145	0.704177	0.5372	TPD52L2	AA176313	zp08c04.r1 Stratagene ovarian cancer (#937219) Homo sapiens cDNA clone IMAGE:595782 5', mRNA sequence.
1566142_at	1.06787	1.03633	0.474558	0.723853	MYH10	AK095268	CDNA FLJ37949 fis, clone CTONG2009156
1566079_at	0.981763	0.726883	0.624769	0.816293	LOC647190	AL833001	Similar to 40S ribosomal protein S16
1566084_at	1.05525	0.658271	0.91743	0.785753	LOC644215	AK090649	Hypothetical LOC644215
1565823_at	1.0414	0.806275	0.781061	0.53511	2007-09-01	BF855173	Septin 7
1565886_at	0.95252	0.919729	0.576455	0.629425	TRPM7	W04694	Transient receptor potential cation channel, subfamily M, member 7
1566539_at	0.996165	1.17371	0.576223	0.963749	MAGI1	AL050129	MRNA; cDNA DKFZp586G081 (from clone DKFZp586G081)
1566243_at	0.729631	0.569877	0.230311	0.45401	TGFBI	AL390176	MRNA; cDNA DKFZp547L144 (from clone DKFZp547L144)
1566191_at	0.850747	0.915462	0.6463	0.842193	JJAZ1	AI907884	RC-BT155-220399-014 BT155 Homo sapiens cDNA, mRNA sequence.
1569312_at	0.959475	0.750429	0.578106	0.655675	ZNF146	BE383308	CDNA clone IMAGE:4067166
1569302_at	0.947539	0.532116	0.584875	0.452727	KIAA1731	BC017394	KIAA1731
1569180_at	0.95602	0.805566	0.526574	0.783005	NSF	BC017896	Homo sapiens, clone IMAGE:4250282, mRNA
1569142_at	0.943658	0.951004	0.561784	0.639901	CAR; LEU5; RFP2; DLEU5; RNF77	BC029514	tripartite motif-containing 13
1569190_at	0.983136	0.692011	0.886822	0.640214	SCLT1	BC014677	Sodium channel and clathrin linker 1
1569201_a_at	0.910922	0.882016	0.487117	0.942181	SEC15L2	BF847120	Homo sapiens, clone IMAGE:3454421, mRNA
1569181_x_at	0.998347	0.879479	0.496741	0.761758	NSF	BC017896	Homo sapiens, clone IMAGE:4250282, mRNA
1569477_at	1.007	0.832472	0.580552	0.920459	FOXO3A	BC025999	Homo sapiens, clone IMAGE:4291396, mRNA
1569484_s_at	0.996427	1.01358	0.449641	0.503688	MDN1	AL603301	DKFZp686H023_r1 686 (synonym: hlcc3) Homo sapiens cDNA clone DKFZp686H023 5', mRNA sequence.
1569323_at	1.02272	0.784634	0.339094	0.542704	PTPRG	BU853579	Protein tyrosine phosphatase, receptor type, G
1568983_a_at	1.00856	0.813429	0.530402	0.706716		BI547087	603190322F1 NIH_MGC_95 Homo sapiens cDNA clone IMAGE:5261717 5', mRNA sequence.
1568815_a_at	0.945083	0.894363	0.619348	0.723877	DDX50	AA903184	DEAD (Asp-Glu-Ala-Asp) box polypeptide 50
1569106_s_at	1.1139	1.55294	1.05636	0.996098	SETD5	BI087313	SET domain containing 5
1569091_at	1.03603	0.979778	0.694186	0.663417	ZMYM2	BC039458	CDNA clone IMAGE:5312161
1569126_at	0.950306	0.612876	0.617675	0.660597	CCNC	BC026272	cyclin C
1569129_s_at	0.922511	0.640898	0.727558	0.790442		BC016013	Homo sapiens, clone IMAGE:4695648, mRNA
1569025_s_at	0.975943	0.842623	0.619684	0.752719	FLJ34562; MGC105131	BC041029	family with sequence similarity 13, member A1
1569041_at	0.965283	0.653601	0.553306	0.783519	ALB	BC035102	CDNA clone IMAGE:5262215
200874_s_at	0.932648	0.871187	0.759021	0.637921	NOL5A	BE796327	Nucleolar protein 5A (56kDa with KKE/D repeat)
200875_s_at	0.962858	0.884717	0.691593	0.564462	NOP56	NM_006392	nucleolar protein 5A (56kDa with KKE/D repeat)
200896_x_at	0.942689	0.866154	0.673122	0.571938	HMG1L2; DKFZp686J1764	NM_004494	hepatoma-derived growth factor (high-mobility group protein 1-like)
200897_s_at	0.820817	0.76276	0.696613	0.646326	PNCA1; SIH002; CGI-151; FLJ22190; FLJ38193; FLJ39139; KIAA0992	NM_016081	palladin, cytoskeletal associated protein
200892_s_at	0.966535	0.906114	0.781444	0.623664	TRA2B; SRFS10; TRA2-BETA; Htra2-beta; DKFZp686F18120	BC000451	splicing factor, arginine/serine-rich 10 (transformer 2 homolog, Drosophila)
200893_at	0.965364	0.897653	0.785491	0.609698	TRA2B; SRFS10; TRA2-BETA; Htra2-beta; DKFZp686F18120	NM_004593	splicing factor, arginine/serine-rich 10 (transformer 2 homolog, Drosophila)
[truncated: 549 more rows]
