# Supplementary material for: Pharmacogenomic Profiling and Pathway Analyses Identify MAPK-Dependent Migration as an Acute Response to SN38 in p53 Null and p53-Mutant Colorectal Cancer Cells
Source: Oxford University Press journal article supplement (doi:10.1158/1535-7163.mct-12-0207), 2012-06-05
Supplement: 15357163mct120207-sup-t3_xls_261.xls [file 15357163mct120207-sup-t3_xls_261.xls]

## Sheet: Sheet1
Supplementary Table 3: List showing 1986 genes that are uniquely altered following SN38 treatment over time in HCT116 p53null cells only. Genes have been normalised and filtered as stated in the materials and methods.
Genes changing in p53 null cells only
SN38 Null
Time ()
Systematic	0	6	12	24	Common	Genbank	Description
225375_at	1.01585	1.26818	1.45281	1.3521	C17orf32	AW975808	Chromosome 17 open reading frame 32
225376_at	0.916376	0.846283	1.15216	0.6002	C20orf11	BG480592	Chromosome 20 open reading frame 11
225365_at	0.92479	0.718633	0.541927	0.745507	ZDHHC20	BG249221	Zinc finger, DHHC-type containing 20
225387_at	0.595271	0.554055	0.762815	0.664587	TM4SF9	AA059445	Transcribed locus
225390_s_at	0.9967	1.30584	1.49208	1.44649	BTEB3; FKLF2; NSLP1; RFLAT1; RFLAT-1	AL390127	Kruppel-like factor 13
225314_at	1.1156	1.26699	1.57597	1.54157	MGC45416	BG291649	602385778F1 NIH_MGC_93 Homo sapiens cDNA clone IMAGE:4514827 5', mRNA sequence.
225306_s_at	1.00542	1.03849	1.51857	1.41721	SLC25A29	AI826268	Solute carrier family 25, member 29
225342_at	0.997784	1.24797	1.55145	1.40511	AK3; AK4	AK026966	adenylate kinase 3-like 1
225346_at	1.02066	0.773797	0.648776	0.639941	mTERFL; FLJ14062	NM_025198	MTERF domain containing 3
225347_at	1.24375	1.49474	1.69445	2.03388	ARL8A	AL520984	ADP-ribosylation factor-like 8A
225327_at	1.023	1.20008	0.931998	1.64142	FLJ10980; MGC126494; MGC126495	AB037791	KIAA1370
225479_at	0.989829	0.99711	0.639205	0.848646	LRRC58	AL524175	Leucine rich repeat containing 58
225468_at	1.08642	1.26656	1.68928	1.41868	FLJ36874	AI761804	FLJ36874 protein
225464_at	0.997943	1.22025	1.50411	1.46161	FRMD6	N30138	FERM domain containing 6
225466_at	0.913792	0.855159	1.42406	1.07263	FLJ36874	BG291961	FLJ36874 protein
225510_at	1.09249	1.27512	1.35922	1.46989	OAF	BG033561	OAF homolog (Drosophila)
225517_at	0.951472	0.879862	0.651527	0.871265	FLJ20582	AW236976	Transcribed locus
225524_at	0.903926	1.02164	1.46945	1.63546	ANTXR2	AU152178	Anthrax toxin receptor 2
225431_x_at	0.988421	0.843841	0.600656	0.780075	ACY1L2	BE779764	Aminoacylase 1-like 2
225450_at	1.04238	1.10726	1.53107	1.47783	AMOTL1	AI433831	Angiomotin like 1
225124_at	0.946699	0.656595	0.674778	0.684011	PPP1R9B	BF508705	Protein phosphatase 1, regulatory (inhibitor) subunit 9B
225135_at	1.12508	1.34422	1.52805	1.30338	SIN3A	AI433017	SIN3 homolog A, transcription regulator (yeast)
225178_at	0.936314	0.81766	0.493096	0.728848	TTC14	W73788	Tetratricopeptide repeat domain 14
225136_at	0.964206	1.08315	1.55384	1.64591	PLEKHA2	BF968578	Pleckstrin homology domain containing, family A (phosphoinositide binding specific) member 2
225162_at	1.05116	1.02795	1.04386	1.54736	SH3D19	BG285417	SH3 domain protein D19
225084_at	0.991847	0.943655	0.624729	0.837601	EXOC5	BG170743	Exocyst complex component 5
225081_s_at	1.14046	1.20049	1.56907	1.3408	R1; JPO2; RAM2; DKFZp762L0311	AK022955	cell division cycle associated 7-like
225093_at	1.2248	1.08091	1.04798	1.54547	UTRN	N66570	Utrophin
225079_at	1.03222	1.23108	1.47241	1.51541	EMP2	AI089325	Epithelial membrane protein 2
225119_at	1.02193	1.41515	1.49578	1.29575	CHMP4B	AW299290	Chromatin modifying protein 4B
225283_at	1.03425	1.01898	0.949422	0.866477	ARRDC4	AV701177	Arrestin domain containing 4
225288_at	1.11287	1.11985	1.11212	1.5568	COL27A1	AI949136	Full-length cDNA clone CS0DI001YP15 of Placenta Cot 25-normalized of Homo sapiens (human)
225290_at	0.863986	0.748622	0.465616	0.664686	ETNK1	AV692425	Ethanolamine kinase 1
225278_at	1.01829	1.15193	1.41746	1.54984	PRKAB2	BF593382	Protein kinase, AMP-activated, beta 2 non-catalytic subunit
225212_at	1.00003	0.655675	1.00028	0.927217	MCSC; PCSCL; SCAMC-2; KIAA1896; MGC105138; MGC119514; MGC119515; MGC119516; MGC119517; RP11-395P17.4	BC005163	solute carrier family 25 (mitochondrial carrier; phosphate carrier), member 25
225826_at	0.985172	1.19429	1.54172	1.32527	MMAB	AV702487	Methylmalonic aciduria (cobalamin deficiency) cblB type
225856_at	0.910988	0.777257	0.47544	0.587522	KIAA0515	BF512028	CDNA clone IMAGE:5267398
225840_at	1.0927	1.31483	1.57876	0.809171	TEF	AA779795	Thyrotrophic embryonic factor
225843_at	1.21884	1.28301	1.49741	1.54411	ZFYVE19	AW015263	Zinc finger, FYVE domain containing 19
225754_at	1.03305	1.14804	1.50795	1.29707	AP1G1	AA142984	Adaptor-related protein complex 1, gamma 1 subunit
225760_at	0.850269	0.669067	0.416372	0.666975	MYSM1	AI302244	Myb-like, SWIRM and MPN domains 1
225785_at	1.10944	0.925186	0.562354	0.694133	REEP3	BG112359	Receptor accessory protein 3
225786_at	0.909419	0.903544	0.488221	0.879742	LOC284702	AI440495	Hypothetical protein LOC284702
225949_at	1.02268	1.26822	1.35858	1.56861	NRBP2	N21030	Nuclear receptor binding protein 2
225929_s_at	0.935202	0.897221	1.29762	1.56886	RNF213	AA233374	Ring finger protein 213
225984_at	0.932035	0.74002	0.513943	0.670012	PRKAA1	AI810497	Protein kinase, AMP-activated, alpha 1 catalytic subunit
225985_at	1.03883	0.823647	0.569944	0.885233	PRKAA1	AI935917	Protein kinase, AMP-activated, alpha 1 catalytic subunit
225885_at	0.877251	0.684362	0.411004	0.954945	EEA1	AI336848	Early endosome antigen 1
225792_at	0.992507	0.881776	0.629418	0.867116	HOOK1	AA618420	Hook homolog 1 (Drosophila)
225865_x_at	1.07395	1.17223	1.63208	1.24751	TH1; NELF-C; NELF-D; HSPC130	AJ238374	TH1-like (Drosophila)
225911_at	1.05249	1.62759	1.71011	2.3291	NPNT	AL138410	Nephronectin
225916_at	1.10042	0.900551	0.653812	0.786148	ZNF131	AA789302	Zinc finger protein 131
225902_at	1.03312	0.895429	0.538551	0.959402	PPIG	AW194716	CDNA FLJ42968 fis, clone BRSTN2016954
225582_at	1.04792	1.15787	1.54036	1.38725	KIAA1754	AA425726	KIAA1754
225590_at	0.916033	0.636077	0.702547	0.842875	SH3RF1	AI686957	SH3 domain containing ring finger 1
225540_at	0.834399	0.852863	1.10399	1.40659	MAP2	BF342661	Microtubule-associated protein 2
225526_at	1.06442	0.970809	0.551129	0.964384	MKLN1	AW611917	Muskelin 1, intracellular mediator containing kelch motifs
225533_at	0.914799	0.762788	0.800898	0.542692	PCL3; MGC23929; MGC131698; MGC149712; MGC149713	AL117477	PHD finger protein 19
225572_at	0.91606	0.790068	0.579305	0.736899	CREB1	AI652633	CDNA FLJ34215 fis, clone FCBBF3021985
225567_at	1.03173	1.27816	1.51495	1.39992	TMEM25	BE207755	MRNA; cDNA DKFZp762E1314 (from clone DKFZp762E1314)
225622_at	1.00195	1.38395	2.06171	2.0505	PAG1	AI860212	Phosphoprotein associated with glycosphingolipid microdomains 1
225557_at	1.07019	1.18806	1.91593	1.30406	AXUD1	AI091372	AXIN1 up-regulated 1
225562_at	1.15756	1.19399	1.54735	1.16956	RASA3	AI684746	RAS p21 protein activator 3
225739_at	1.06219	1.21625	1.61716	1.30615	RAB11FIP4	BF064276	RAB11 family interacting protein 4 (class II)
225736_at	0.982945	1.23131	1.45815	1.20388	FBXO22	BE966247	F-box protein 22
225681_at	0.932979	1.34278	1.49048	2.31035	CTHRC1	AA584310	Collagen triple helix repeat containing 1
225678_at	0.952328	0.75876	0.892451	0.639158	RPC8; KIAA1665; MGC29654; MGC111097	AB051452	polymerase (RNA) III (DNA directed) polypeptide H (22.9kD)
224416_s_at	1.09516	1.21604	1.4618	1.24111	EG1; magicin; DKFZP434N185; 1500003D12Rik	AF358829	mediator of RNA polymerase II transcription, subunit 28 homolog (S. cerevisiae)
224407_s_at	0.860043	1.10383	1.04265	1.51621	MST4; MASK	AF344882	serine/threonine protein kinase MST4
224361_s_at	0.979897	1.1266	1.54807	1.58113	CRL4; EVI27; IL17BR; IL17RH1; MGC5245	AF250309	interleukin 17 receptor B
224354_at	1.04387	0.957032	0.859672	1.8408	YA61	AF220415	Homo sapiens gastric-associated differentially-expressed protein YA61P (YA61) mRNA, complete cds.
224445_s_at	1.12254	1.18408	1.56167	1.4185	MGC2550	BC005999	zinc finger, FYVE domain containing 21
224441_s_at	0.986917	0.83812	0.63842	0.596454	MGC14793	BC005991	ubiquitin specific peptidase 45
224210_s_at	1.01828	1.2956	1.52346	1.83796	PMP24	BC001147	peroxisomal membrane protein 4, 24kDa
224316_at	1.08379	0.867724	0.629187	0.913019	FLJ20038	AF130091	potassium channel tetramerisation domain containing 9
224560_at	1.05912	1.05254	1.56168	1.54085	TIMP2	BF107565	601823915F1 NIH_MGC_79 Homo sapiens cDNA clone IMAGE:4043714 5', mRNA sequence.
224558_s_at	1.14932	1.10434	0.989891	1.51448	MALAT-1	AI446756	tj15d04.x1 NCI_CGAP_Gas4 Homo sapiens cDNA clone IMAGE:2141575 3', mRNA sequence.
224595_at	1.08412	1.36963	1.31936	1.51043	CTL1; CDW92; CHTL1; RP11-287A8.1	AK022549	solute carrier family 44, member 1
224462_s_at	1.07733	1.29246	1.61251	1.21689	MGC13016	BC006123	coiled-coil-helix-coiled-coil-helix domain containing 6
223879_s_at	1.10712	1.24724	1.1805	1.77603	FLJ10125; FLJ38829; FLJ41673; FLJ42450; FLJ45656; Nbla00307	AF309387	oxidation resistance 1
223839_s_at	1.04257	1.16256	1.45516	1.29146	SCD	AF132203	PRO1933
223721_s_at	1.06531	1.24271	1.52023	1.84558	JDP1; RP11-57G10.2	AF176013	DnaJ (Hsp40) homolog, subfamily C, member 12
224097_s_at	1.0632	1.2646	1.59733	1.3985	JAM; KAT; JAM1; JAMA; JCAM; CD321; JAM-1; JAM-A; PAM-1	AF191495	F11 receptor
224037_at	1.03543	0.958862	0.866675	0.586857	FLJ10498; DKFZp686E22207	AF132198	SDA1 domain containing 1
224188_s_at	1.19596	1.51792	1.71523	1.42883	APP3	BC001208	X-prolyl aminopeptidase (aminopeptidase P) 3, putative
224156_x_at	1.00438	0.9823	1.45429	1.47427	CRL4; EVI27; IL17BR; IL17RH1; MGC5245	AF208111	interleukin 17 receptor B
224150_s_at	0.85138	0.74232	0.443774	0.658427	BITE; FLJ13036	AF289495	centrosomal protein 70kDa
224164_at	1.16396	1.56374	1.50041	1.26389	TM3; TRK; NEM1; TM-5; TM30; TM30nm; TPMsk3; hscp30; MGC3261; FLJ41118; MGC14582; MGC72094; OK/SW-cl.5	AY004867	tropomyosin 3
224173_s_at	1.05414	1.18626	1.33801	1.20538	RPML28; MGC3314; MRP-L28; FLJ44438; MGC24095	BC000217	mitochondrial ribosomal protein L30
223947_s_at	1.10302	1.48262	1.35597	1.45357	SUR2; MED23; CRSP130; CRSP133; DRIP130; DKFZp434H0117	AL136776	cofactor required for Sp1 transcriptional activation, subunit 3, 130kDa
223895_s_at	0.973673	1.23967	1.54203	1.51889	FLJ20778; MGC129899	BC001038	epsin 3
223984_s_at	0.867101	0.655623	0.480011	0.728151	PRO2463; KIAA0410	BC001104	nucleoporin like 1
224910_at	0.998019	1.15083	1.59772	1.30739	CARHSP1	AL575747	Calcium regulated heat stable protein 1, 24kDa
224916_at	0.983476	1.01594	1.31605	1.55585	TMEM173	BG110811	Transmembrane protein 173
224897_at	1.00379	1.21519	1.18163	1.62828	WDR26	BF510490	WD repeat domain 26
224898_at	1.0292	1.34856	1.24909	1.70564	WDR26	BG177759	WD repeat domain 26
224909_s_at	0.948425	1.0181	1.41802	1.49845	PREX1	BF308645	Phosphatidylinositol 3,4,5-trisphosphate-dependent RAC exchanger 1
224933_s_at	0.924155	0.853134	0.49905	0.995511	JMJD1C	AA425650	Jumonji domain containing 1C
224855_at	1.01449	0.628432	1.00569	1.01648	PYCR2	AL561868	Pyrroline-5-carboxylate reductase family, member 2
224865_at	0.98339	0.850714	0.47209	0.715946	MLSTD2	N63551	Male sterility domain containing 2
224866_at	0.881793	0.781551	0.48084	0.716614	MLSTD2	AK024967	Male sterility domain containing 2
224868_at	1.04625	1.15644	1.48435	1.1439	ZDHHC5	BE961925	601655337R1 NIH_MGC_65 Homo sapiens cDNA clone IMAGE:3845864 3', mRNA sequence.
224843_at	1.05094	1.62891	0.926611	0.965165	FLJ21611; KIAA1458	AB040891	SLAIN motif family, member 2
224848_at	0.992486	0.768498	0.647563	0.70528	CDK6	AA922068	Cyclin-dependent kinase 6
224875_at	1.03268	0.850439	0.503935	0.724828	C5orf24	BG492488	Chromosome 5 open reading frame 24
225020_at	1.23541	1.59258	1.75295	1.51076	AIP1; AF9Q34; DIP1/2; FLJ39072; KIAA1743	AB051530	DAB2 interacting protein
225060_at	1.03896	1.19013	1.34214	1.55051	LRP11	BF696304	Low density lipoprotein receptor-related protein 11
225062_at	1.04188	1.47503	1.35521	1.39736	LOC389831	BF667120	Hypothetical gene supported by AL713796
224954_at	1.09775	1.14447	1.28336	1.50253	SHMT; CSHMT; MGC15229; MGC24556	Y14486	serine hydroxymethyltransferase 1 (soluble)
224986_s_at	1.04283	1.13719	1.45849	1.21246	PDPK1	AL040394	3-phosphoinositide dependent protein kinase-1
224989_at	0.829887	0.893328	1.01162	2.05291	FRAT2	AI824013	Full-length cDNA clone CS0DE011YO20 of Placenta of Homo sapiens (human)
224690_at	1.10241	1.2674	1.49951	1.77564	C20orf108	BG432350	Chromosome 20 open reading frame 108
224674_at	0.965318	1.12515	1.51079	1.17805	TTYH3	AI934753	Tweety homolog 3 (Drosophila)
224677_x_at	1.11117	1.34892	1.59997	1.44723	C11orf31	AV729234	Chromosome 11 open reading frame 31
224722_at	0.994038	0.955638	0.540159	0.864792	MIB1	BE048628	Mindbomb homolog 1 (Drosophila)
224701_at	1.08435	1.25008	1.48322	1.29535	PARP14	AA056548	Poly (ADP-ribose) polymerase family, member 14
224703_at	1.04472	1.23407	1.59436	1.40014	WDR22	AI814644	WD repeat domain 22
224653_at	1.00518	1.16678	1.54877	1.30924	EIF4EBP2	U88989	Eukaryotic translation initiation factor 4E binding protein 2
224797_at	0.88196	0.668533	0.493694	0.518289	TLIMP; KIAA1376	AB037797	arrestin domain containing 3
224786_at	0.9273	0.841101	0.608462	0.759665	SCOCO; HRIHFB2072	AL133580	short coiled-coil protein
224812_at	1.0863	1.22892	1.47056	1.57182	HIBADH	AL577446	3-hydroxyisobutyrate dehydrogenase
224823_at	1.04598	1.20736	1.63088	2.04523	MYLK	AA526844	Myosin, light chain kinase
224773_at	0.983202	1.22522	1.63023	1.301	NAV1	N57538	Neuron navigator 1
224778_s_at	0.956378	0.902072	0.633637	0.780945	KCNN3	AK025902	CDNA clone IMAGE:5263531
224763_at	1.12727	1.35665	1.53459	1.58854	RPL37	BF724210	Ribosomal protein L37
227329_at	0.980844	1.07443	1.64936	1.43529	BTBD4	AU156821	AU156821 PLACE1 Homo sapiens cDNA clone PLACE1004836 3', mRNA sequence.
227326_at	0.908972	1.20258	1.45411	1.63671	FLJ46603	BE966768	601661268R1 NIH_MGC_72 Homo sapiens cDNA clone IMAGE:3916097 3', mRNA sequence.
227327_at	1.04297	1.24502	1.59834	1.42411	MEGF8	BF062538	Multiple EGF-like-domains 8
227382_at	1.20872	1.3532	1.68713	1.49484	CYB5B	AA649048	Cytochrome b5 type B (outer mitochondrial membrane)
227270_at	1.03727	1.00053	0.733289	0.645357	LOC285550	BF593037	naa30h03.x1 NCI_CGAP_Kid11 Homo sapiens cDNA clone IMAGE:3258077 3' similar to TR:Q9UBJ4 Q9UBJ4 TRANSPOSASE-LIKE PROTEIN. ;, mRNA sequence.
227260_at	0.997199	1.31495	0.823561	1.66156	ANKRD10	AV724266	Transcribed locus
227306_at	1.11617	1.24668	1.65368	1.8416		AK024898	CDNA: FLJ21245 fis, clone COL01184
227319_at	1.04037	1.14391	1.5665	1.45342	C16orf44	AI693862	CDNA FLJ31635 fis, clone NT2RI2003420
227295_at	0.973975	1.22916	1.12874	1.54444	IKIP	AW182575	IKK interacting protein
227499_at	0.913967	0.795214	0.469747	0.893923	DPP10	AA001400	CDNA clone IMAGE:5311370
227474_at	0.971341	0.737529	0.706045	0.5522	LOC654433	AY007128	Hypothetical LOC654433
227524_at	0.904354	0.954657	0.58771	0.994197	DPP10	H06187	CDNA clone IMAGE:5311370
227521_at	1.06901	1.20958	1.53646	1.18622	FBXO33	N22902	yx66e03.s1 Soares melanocyte 2NbHM Homo sapiens cDNA clone IMAGE:266716 3', mRNA sequence.
227413_at	1.00135	0.79539	0.541637	0.707092	UBLCP1	BF965546	Ubiquitin-like domain containing CTD phosphatase 1
227428_at	1.01033	0.766257	0.524686	0.603571	GABPA	BE876628	GA binding protein transcription factor, alpha subunit 60kDa
227402_s_at	1.03846	0.814052	0.652342	0.754795	C8orf53	AI056895	Chromosome 8 open reading frame 53
227461_at	0.992502	1.20061	1.35814	1.7506	STON2	AA632295	Stonin 2
227518_at	1.09	1.26924	1.51507	1.27863	SLC35E1	AW051365	Solute carrier family 35, member E1
227432_s_at	1.05776	1.20693	1.78265	1.50444	INSR	AI215106	Insulin receptor
227051_at	0.994912	1.42885	1.59747	1.0955		AU157716	Homo sapiens, clone IMAGE:4393354, mRNA
227063_at	1.14668	1.32369	1.50439	1.46984	C17orf61	BF975929	Chromosome 17 open reading frame 61
227062_at	0.966818	1.35413	0.915479	1.42317	TncRNA	AU155361	Trophoblast-derived noncoding RNA
227111_at	1.02545	1.50712	1.39734	1.39472	ZBTB34	BG179317	Zinc finger and BTB domain containing 34
227088_at	1.15768	1.44772	1.057	1.16498	PDE5A	BF221547	Phosphodiesterase 5A, cGMP-specific
226986_at	1.08205	1.2309	1.50385	1.54009	WIPI2	AA933779	WD repeat domain, phosphoinositide interacting 2
226994_at	1.06756	1.24929	1.52108	1.18534	DNAJA2	AW057513	DnaJ (Hsp40) homolog, subfamily A, member 2
227038_at	1.00714	0.815061	0.625807	0.768278	SGMS2	AI963083	Sphingomyelin synthase 2
227045_at	0.859288	0.736516	0.63679	0.715754	ZNF614	AI087872	Zinc finger protein 614
227204_at	0.979256	1.11333	1.47603	1.16667	PARD6G	AI817448	Par-6 partitioning defective 6 homolog gamma (C. elegans)
227248_at	1.10714	1.59926	2.25588	1.43707	PLEKHH3	AL563218	Pleckstrin homology domain containing, family H (with MyTH4 domain) member 3
227221_at	0.982564	1.18918	1.42149	1.53123	SELT	N36085	CDNA clone IMAGE:5261213
227143_s_at	1.00353	1.1923	1.51994	1.09659	BID	AA706658	BH3 interacting domain death agonist
227146_at	0.995113	1.20398	1.51495	1.33131	QSOX2	AW873348	Quiescin Q6 sulfhydryl oxidase 2
227934_at	0.882271	0.90252	0.471212	0.785464		AI769559	Transcribed locus
227930_at	1.23679	1.43492	1.7013	2.18379	EIF2C4	AI669957	Eukaryotic translation initiation factor 2C, 4
227945_at	1.05704	1.24125	1.51128	1.18943	TBC1D1	BE882538	TBC1 (tre-2/USP6, BUB2, cdc16) domain family, member 1
227919_at	1.19071	1.15374	1.41119	2.29275	UCA1	AA702248	Urothelial cancer associated 1
227966_s_at	0.901681	0.945601	1.22531	1.54503	CCDC74B	AA524895	Coiled-coil domain containing 74B
227973_at	1.15833	0.925678	0.601748	0.839778	FLJ38973	BF130937	Hypothetical protein FLJ38973
227873_at	0.905488	0.959432	1.56947	0.7009	C5orf14	BE547587	Chromosome 5 open reading frame 14
227897_at	0.993277	1.17775	1.03168	1.49114	RAP2B	N20927	RAP2B, member of RAS oncogene family
227904_at	0.958076	0.691778	0.524639	0.50741	AZI2	BF000175	5-azacytidine induced 2
227894_at	1.08939	1.20002	1.47547	1.08319	WDR90	AL043021	WD repeat domain 90
228092_at	0.98778	0.802981	0.817806	0.64589	CREM	AL552470	CAMP responsive element modulator
228057_at	1.21354	1.32147	1.46741	1.85998	DDIT4L	AA528140	DNA-damage-inducible transcript 4-like
228108_at	1.13102	1.16016	1.15372	1.49459		AW274846	CDNA clone IMAGE:5263177
227997_at	0.907253	0.92714	1.16816	1.48029	IL17RD	AW007080	Interleukin 17 receptor D
228011_at	0.935365	0.763579	0.671248	0.641924	LOC137392	BF338870	602036126F1 NCI_CGAP_Brn64 Homo sapiens cDNA clone IMAGE:4183999 5', mRNA sequence.
227984_at	1.18345	1.1364	1.31359	1.54074	LOC650392	BE464483	Hypothetical protein LOC650392
227987_at	0.812831	0.740479	0.3257	1.02255	VPS13A	AW629014	Vacuolar protein sorting 13 homolog A (S. cerevisiae)
227988_s_at	0.827869	0.690721	0.39253	0.875775	VPS13A	AW629014	Vacuolar protein sorting 13 homolog A (S. cerevisiae)
228123_s_at	1.09056	1.31997	1.57709	1.29801	ABHD12	AW303865	Abhydrolase domain containing 12
227636_at	0.925865	0.706261	0.596199	0.625701	THAP5	BG500677	THAP domain containing 5
227616_at	0.901243	0.835987	0.939556	0.624399	BCL9L	BG481877	B-cell CLL/lymphoma 9-like
227663_at	0.822545	0.73142	0.439619	0.727788	RGNEF	BE674006	Clone HLS_IMAGE_767345 mRNA sequence
227568_at	0.893159	0.793525	0.436451	0.968259	FLJ16050	AF131793	HECT domain containing 2
227542_at	0.994245	0.974588	0.644104	0.845677	SOCS6	AU157543	Suppressor of cytokine signaling 6
227543_at	0.975351	1.05933	0.945837	0.5226	RNASEH2C	AI990526	Ribonuclease H2, subunit C
227590_at	1.0064	0.859713	0.860728	0.607765	LOC150383	BE501980	Similar to RIKEN cDNA 2210021J22
227572_at	1.02422	1.20323	1.50867	1.36985	USP30	AA528138	Ubiquitin specific peptidase 30
227778_at	1.06904	1.23342	1.53053	1.52694	KIAA1833	H11075	Hypothetical protein KIAA1833
227788_at	1.09412	1.38258	1.47336	1.5589	USP13	AW295324	CDNA FLJ34165 fis, clone FCBBF3014770
227766_at	0.875493	0.658874	0.41572	0.585684	LIG4	AI829314	Ligase IV, DNA, ATP-dependent
227767_at	1.00298	0.816384	0.642566	0.781827	CSNK1G3	AI073822	Casein kinase 1, gamma 3
227816_at	1.04338	1.15231	1.52837	1.64906	HNRPC	BF591483	CDNA clone IMAGE:30530513
227801_at	1.03055	0.67235	0.537563	0.72753	TRIM59	N90779	Tripartite motif-containing 59
227746_at	1.01839	1.30339	1.30292	1.77052	ELAVL1	BE047452	ELAV (embryonic lethal, abnormal vision, Drosophila)-like 1 (Hu antigen R)
227814_at	1.0751	1.36795	1.90223	1.27167	WDR53	AA789329	WD repeat domain 53
226316_at	0.922484	0.943832	0.608604	0.795582	C13orf10	BF592957	CDNA clone IMAGE:5295896
226310_at	0.981499	0.812224	0.574711	1.10969	MGC39830	AI743511	Transcribed locus
226312_at	0.904031	0.894193	0.576293	0.946517	RICTOR	BF940270	Rapamycin-insensitive companion of mTOR
226290_at	0.771927	0.708802	0.351062	0.666414	BDP1	AW051603	B double prime 1, subunit of RNA polymerase III transcription initiation factor IIIB
226341_at	0.72202	0.601584	0.290557	0.441805		AI535737	cong2.P5.a4 conorm Homo sapiens cDNA 3', mRNA sequence.
226345_at	0.888208	0.921343	0.629203	0.896301	ARL8	AW270158	CDNA FLJ12853 fis, clone NT2RP2003456
226327_at	0.924033	0.886436	0.746717	0.660539	ZNF507	N64593	yz86a05.s1 Soares_multiple_sclerosis_2NbHMSP Homo sapiens cDNA clone IMAGE:289904 3', mRNA sequence.
226326_at	0.887351	0.854323	0.561239	0.870822	PCGF5	AI798098	Polycomb group ring finger 5
226239_at	0.885197	0.559782	0.918717	0.841605	TMEM150	AL573722	Transmembrane protein 150
226274_at	1.13219	1.14923	1.58167	1.38902	XRN; CLC5; XLRH; CLCK2; DENTS; NPHL2; hCIC-K2; hClC-K2	AK025562	chloride channel 5 (nephrolithiasis 2, X-linked, Dent disease)
226281_at	1.1406	0.730425	1.32291	1.63916	DNER	BF059512	Delta/notch-like EGF repeat containing
226271_at	1.12461	1.51986	1.67693	1.65639	GDAP1	N46350	Ganglioside-induced differentiation-associated protein 1
226268_at	0.894954	0.830421	0.574504	0.690757	RAB21	AI309554	RAB21, member RAS oncogene family
226431_at	1.20476	1.4873	1.62384	2.01323	ALS2CR13	AK025007	Amyotrophic lateral sclerosis 2 (juvenile) chromosome region, candidate 13
226432_at	0.948969	0.889057	0.633825	0.981373	ETNK1	AI276880	Ethanolamine kinase 1
226413_at	0.933641	0.83925	0.714672	0.537943	LOC400027	AA044705	Hypothetical gene supported by BC047417
226414_s_at	1.17095	1.22393	1.56504	1.31397	ANAPC11	BG180679	APC11 anaphase promoting complex subunit 11 homolog (yeast)
226458_at	0.817812	0.746387	0.536637	0.62269	SPATA2	AL559202	CDNA FLJ30340 fis, clone BRACE2007411
226459_at	0.978074	1.12802	1.30205	1.5252	PIK3AP1	AW575754	Phosphoinositide-3-kinase adaptor protein 1
226446_at	1.00012	1.14374	1.74041	1.45567	HES6	AW249678	Hairy and enhancer of split 6 (Drosophila)
226365_at	0.947062	0.910535	0.53005	1.21712	RGNEF	W03242	Clone HLS_IMAGE_767345 mRNA sequence
226368_at	1.28837	1.28173	1.64315	1.83701	CHST11	AI806905	Carbohydrate (chondroitin 4) sulfotransferase 11
226393_at	1.10833	1.29885	1.35182	1.51579	CYP2U1	AW055161	Cytochrome P450, family 2, subfamily U, polypeptide 1
226399_at	0.860353	0.761098	0.5099	0.831638		AL121021	Transcribed locus
226395_at	0.99016	0.834299	0.652925	0.8004	LOC286170	AI912618	Hypothetical protein LOC286170
226382_at	1.03721	1.05435	1.51224	1.62814	LOC283070	AA528080	Hypothetical protein LOC283070
226072_at	1.0173	1.24513	1.51069	1.32816	FUK	AW080798	Fucokinase
226094_at	0.928219	0.94706	0.519998	0.884219	PIK3C2A	AI401379	Phosphoinositide-3-kinase, class 2, alpha polypeptide
226098_at	0.945382	0.920104	0.565026	0.93917	WDR56; KIAA1374; MGC126543	AB037795	intraflagellar transport 80 homolog (Chlamydomonas)
226100_at	0.877855	0.822643	0.617332	0.699941	MLL5	AI762876	Myeloid/lymphoid or mixed-lineage leukemia 5 (trithorax homolog, Drosophila)
226013_at	1.13084	1.29978	1.62387	1.51138	TRAK1	AW451452	Trafficking protein, kinesin binding 1
224767_at	1.0619	1.46261	1.47374	1.48065		AL044126	DKFZp434N0428_s1 434 (synonym: htes3) Homo sapiens cDNA clone DKFZp434N0428 3', mRNA sequence.
225997_at	0.877034	0.906368	0.636443	0.904993	MATS2; MOB4A; MGC33910	AL162039	MOB1, Mps One Binder kinase activator-like 1A (yeast)
226036_x_at	1.1112	1.2992	1.63623	1.37198	CASP2	BE139156	xr67f11.x1 NCI_CGAP_Ov26 Homo sapiens cDNA clone IMAGE:2765229 3' similar to contains Alu repetitive element;contains element MIR repetitive element ;, mRNA sequence.
226033_at	1.07703	1.30344	1.59285	1.39847	KIAA1203	AB033029	ubiquitin specific peptidase 31
226018_at	1.01527	1.1271	1.44687	1.83071	C7orf41	W73230	Chromosome 7 open reading frame 41
226189_at	0.680445	0.471403	0.438858	0.805902	ITGB8	BF513121	Integrin, beta 8
226175_at	1.11936	1.09098	1.62683	1.32578	TTC9C	AI890604	Tetratricopeptide repeat domain 9C
226216_at	0.968762	1.52205	1.83204	1.93576	INSR	W84556	Insulin receptor
226202_at	1.08256	1.27587	1.68491	1.39258	ZNF398	AI761824	Zinc finger protein 398
226125_at	0.896801	1.15615	1.12186	1.66973	SLC9A3	BF346665	CDNA clone IMAGE:4346813
226109_at	0.985166	0.850034	0.489706	0.752488	YG81; C21orf14; C21orf38; DKFZp781D1223	AK023825	chromosome 21 open reading frame 91
226146_at	0.914085	0.863332	0.731249	0.603406	DYNC1LI2	BE503186	CDNA clone IMAGE:5294560
226811_at	1.10102	1.07491	1.97177	1.86948	FAM46C	AL046017	Family with sequence similarity 46, member C
226795_at	1.04258	1.11285	1.47887	1.52052	CHDC1	AW007739	Transcribed locus
226793_at	1.03354	1.23986	1.54755	1.24405	LOC283267	AI913533	Hypothetical protein LOC283267
226853_at	1.00598	1.03074	0.610816	1.11172	BMP2K	AU145366	BMP2 inducible kinase
226831_at	0.899488	0.863949	0.582593	0.847737	LOC91137	AA928542	om73g04.s1 NCI_CGAP_GC4 Homo sapiens cDNA clone IMAGE:1552854 3', mRNA sequence.
226747_at	0.993293	0.981927	1.10997	1.60284	KIAA1344	AB037765	KIAA1344
226726_at	1.0843	1.29166	1.40656	1.66314	MBOAT2	W63676	Membrane bound O-acyltransferase domain containing 2
226939_at	0.911913	0.8274	1.27012	1.53229	CPEB2	AI202327	Cytoplasmic polyadenylation element binding protein 2
226922_at	0.974105	0.804489	0.459888	0.631723	RANBP2	BF215302	Transcribed locus
226931_at	0.776337	0.543531	0.854238	1.20152	TMTC1	AU151239	Transmembrane and tetratricopeptide repeat containing 1
226956_at	1.08168	1.30436	1.50606	1.48071	MTMR3	AW025389	Myotubularin related protein 3
226959_at	1.11676	1.13564	1.04691	1.68899	LOC283070	AL137430	Hypothetical protein LOC283070
226962_at	0.779674	0.595282	0.33326	0.578191	ZBTB41	AW299558	Zinc finger and BTB domain containing 41
226882_x_at	1.35778	1.49511	2.09446	1.36358	WDR4	AI861913	WD repeat domain 4
226885_at	0.877477	0.784406	0.512933	0.807231		AI743880	Transcribed locus
226857_at	0.980826	1.17865	1.49172	1.281	ARHGEF19	AW170520	Rho guanine nucleotide exchange factor (GEF) 19
226905_at	1.11118	1.10769	1.54655	1.67782	FAM101B	BG036514	Family with sequence similarity 101, member B
226893_at	1.03605	1.20903	1.52348	1.25069	ABL2	AW173164	CDNA FLJ31718 fis, clone NT2RI2006647
226549_at	1.10259	1.34555	1.68704	1.61653	SBK1	BF447901	SH3-binding domain kinase 1
226552_at	1.09893	1.27534	1.72608	1.68188	LOC389792	BF110608	Transcribed locus, strongly similar to XP_531199.1 hypothetical protein XP_531199 [Pan troglodytes]
226529_at	0.970411	0.911754	0.605846	0.971836	TMEM106B	BF513060	Transmembrane protein 106B
226541_at	0.873593	0.735659	0.632336	0.679058	FBXO30	AI808182	F-box protein 30
226588_at	0.890994	0.731527	0.482575	0.692467	KIAA1604	AB046824	KIAA1604 protein
226482_s_at	1.20023	1.2588	1.68037	1.60347	F11R	AI814545	F11 receptor
226487_at	1.12023	1.59856	1.29647	1.76781	C12orf34	BE551088	Chromosome 12 open reading frame 34
226489_at	1.06355	1.24024	1.58088	1.79035	TMCC3	BG177562	Transmembrane and coiled-coil domain family 3
226472_at	0.94776	0.822176	0.655537	0.869182	PPIL4	BF515889	Peptidylprolyl isomerase (cyclophilin)-like 4
226473_at	1.06913	1.1314	1.52343	1.19986	CBX2	BE514414	Chromobox homolog 2 (Pc class homolog, Drosophila)
226503_at	1.06782	0.967317	0.5435	0.806368	RIF1	BE504653	RAP1 interacting factor homolog (yeast)
226670_s_at	0.940081	1.2081	1.35169	1.54189		AL109839
226684_at	0.947847	1.1793	1.38345	1.4158	C14orf103	AI217906	Chromosome 14 open reading frame 103
226722_at	1.02053	1.19284	1.44206	1.51043	FAM20C	BE874872	601488922F1 NIH_MGC_69 Homo sapiens cDNA clone IMAGE:3891220 5', mRNA sequence.
226721_at	0.922998	0.970966	0.581392	0.784737	DPY19L4	AW517711	Dpy-19-like 4 (C. elegans)
226707_at	1.00705	1.11429	1.44321	1.51764	NAPRT1	AI925574	Nicotinate phosphoribosyltransferase domain containing 1
226604_at	0.961645	0.923434	0.619307	0.998626	TMTC3	AA418403	Transmembrane and tetratricopeptide repeat containing 3
226599_at	1.0909	1.53608	1.4149	1.49875	KIAA1727	AA527080	KIAA1727 protein
226600_at	1.04639	0.89325	0.480151	0.848389	TMTC3	AA428286	Transmembrane and tetratricopeptide repeat containing 3
226641_at	1.00096	1.0805	1.25472	1.53758	LOC91526	AU157224	CDNA FLJ11570 fis, clone HEMBA1003309
219915_s_at	0.912329	1.18889	1.41211	1.52971	TAT1; PRO0813	NM_018593	solute carrier family 16, member 10 (aromatic amino acid transporter)
219924_s_at	0.9983	1.25339	1.50734	1.09368	MYM; ZNF258; ZNF198L4	NM_007167	zinc finger, MYM-type 6
219889_at	1.0078	1.28143	1.4911	1.69823	FRAT1	NM_005479	frequently rearranged in advanced T-cell lymphomas
219961_s_at	0.978716	1.31021	1.38972	1.51004	HT013; MGC102941; MGC141930; DKFZP586H021	NM_018474	chromosome 20 open reading frame 19
219929_s_at	1.11279	1.23682	1.4546	1.54601	MGC2550	NM_024071	zinc finger, FYVE domain containing 21
219932_at	1.20817	1.45182	1.34284	1.58623	FATP6; ACSVL2; FACVL2; VLCS-H1; DKFZp779M0564	NM_014031	solute carrier family 27 (fatty acid transporter), member 6
219805_at	1.02288	0.718807	0.721735	0.613081	FLJ22965	NM_022101	chromosome X open reading frame 56
219806_s_at	1.09852	1.23412	1.63458	1.4859	FN5	NM_020179	chromosome 11 open reading frame 75
219793_at	1.15943	1.09746	0.89056	1.58773	DKFZp666H147	NM_022133	sorting nexin 16
219863_at	0.873302	1.12462	1.50041	1.69103	CEB1; CEBP1	NM_016323	hect domain and RLD 5
219869_s_at	0.925077	1.3717	1.42351	1.45219	BIGM103; LZT-Hs6	NM_022154	solute carrier family 39 (zinc transporter), member 8
219834_at	0.856921	1.01256	0.604911	0.908824	CARF; FLJ21579; NYD-SP24; DKFZp667N246	NM_024744	amyotrophic lateral sclerosis 2 (juvenile) chromosome region, candidate 8
219838_at	0.976123	0.722825	0.893584	0.636137	HCC-8; FLJ12572; FLJ12939	NM_022905	tetratricopeptide repeat domain 23
220137_at	1.12268	1.2343	1.52107	1.28697	FLJ20674	NM_019086	hypothetical protein FLJ20674
220182_at	1.17061	1.51625	1.43986	1.2807	APC2; MCSC2; MGC2615; SCaMC-3	NM_024103	solute carrier family 25 (mitochondrial carrier; phosphate carrier), member 23
220153_at	1.07011	1.44283	1.76125	1.47803	LALP1; FLJ30978; MGC141913; RP11-483F11.1	NM_020354	ectonucleoside triphosphate diphosphohydrolase 7
219999_at	0.964649	1.3331	1.53963	1.43686	MAN2A2	NM_018621	mannosidase, alpha, class 2A, member 2; synonym: MANA2X; alpha-mannosidase IIx; MAN IIx; manosidase, alpha-, type II, isozyme X; mannosidase, alpha type II-X; Homo sapiens mannosidase, alpha, class 2A, member 2 (MAN2A2), mRNA.
220018_at	0.953225	0.840188	0.743458	0.638208	HAKAI; RNF188; FLJ23109; MGC163401; MGC163403	NM_024814	Cas-Br-M (murine) ecotropic retroviral transforming sequence-like 1
219972_s_at	0.943501	0.587807	0.884343	0.691928	FBP2; FLJ12799; FLJ38170	NM_022495	chromosome 14 open reading frame 135
219978_s_at	1.08078	1.02728	1.27021	1.56968	LNP; ANKT; SAPL; BM037; Q0310; FLJ13421; PRO0310p1	NM_018454	nucleolar and spindle associated protein 1
220066_at	0.999672	1.05785	1.38268	1.57134	CD; ACUG; BLAU; IBD1; NLRC2; NOD2B; CARD15; CLR16.3; PSORAS1	NM_022162	nucleotide-binding oligomerization domain containing 2
220040_x_at	1.08192	1.25239	1.54059	1.44709	HCA127	NM_018684	KIAA1166
219558_at	1.02377	1.4005	1.09724	1.57023	AFURS1	NM_024524	ATPase family homolog up-regulated in senescence cells
219540_at	0.826025	0.825817	0.418029	0.827665	ZNF267	AU150728	Transcribed locus
219481_at	1.12088	1.54033	1.9591	2.10365	FLJ22584	NM_024525	tetratricopeptide repeat domain 13
219487_at	0.830323	0.572823	0.506347	0.598803	C12orf58; FLJ23560	NM_024685	Bardet-Biedl syndrome 10
219489_s_at	1.06026	1.11411	1.88168	1.4097	RRP2; MGC16997	NM_017821	rhomboid, veinlet-like 2 (Drosophila)
219458_s_at	1.12811	1.43975	1.7226	1.32138	MST077; MSTP077; FLJ22109; FLJ22609	NM_022072	NOL1/NOP2/Sun domain family, member 3
219506_at	0.980821	1.01029	1.04751	1.87045	FLJ23221	NM_024579	chromosome 1 open reading frame 54
219513_s_at	1.25568	1.5623	1.45368	1.69382	NSP1	NM_005490	SH2 domain containing 3A
219490_s_at	1.11848	1.45824	1.58226	1.49775	SNM1B; FLJ12810; FLJ13998; DKFZp686C24187	NM_022836	DNA cross-link repair 1B (PSO2 homolog, S. cerevisiae)
219682_s_at	1.25853	1.07781	1.10322	1.32397	UMS; XHL; TBX3-ISO	NM_016569	T-box 3 (ulnar mammary syndrome)
219763_at	1.16014	1.1233	1.61946	1.57346	FAM31A; FLJ38464; KIAA1608; RP11-230L22.3	NM_024820	DENN/MADD domain containing 1A
219696_at	1.03706	1.0993	0.560427	1.11869	FLJ20054; DKFZp547O0715	NM_019049	hypothetical protein FLJ20054
219735_s_at	0.996882	1.11735	1.40258	1.49754	LBP9; CRTR1; LBP-9	NM_014553	transcription factor CP2-like 1
219611_s_at	1.01668	1.05793	1.51239	1.28134	FLJ13976; FLJ22000; DKFZp434P232; DKFZP434L0117	NM_022778	coiled-coil domain containing 21
219671_at	1.06193	1.28781	1.57549	1.74248	HLP4; DKFZp761G122	AL136591	hippocalcin like 4
219750_at	0.953586	0.738141	0.583803	0.754387	FLJ11155	NM_018342	transmembrane protein 144
219644_at	0.898928	0.945416	0.598361	0.923679	MGC149726; NY-REN-58	NM_016122	coiled-coil domain containing 41
219653_at	0.823492	0.683663	1.0615	0.64962	C20orf40	NM_014054
220963_s_at	0.96412	0.93267	0.86666	0.587296	MGC10731; RP4-733M16.4	NM_030907	chromosome 1 open reading frame 89
220940_at	1.04024	0.808483	0.661601	1.09204	FLJ21281; FLJ90089; MGC149864; MGC149865	NM_025190	KIAA1641
221004_s_at	1.16212	1.26263	1.49378	1.79527	E25; BRI3; E25C; ITM3; BRICD2C	NM_030926	integral membrane protein 2C
221025_x_at	1.06254	0.804776	0.632511	0.817889	FLJ34711; FLJ40012; DKFZP434G1415; DKFZp781B2386	NM_031292	pseudouridylate synthase 7 homolog (S. cerevisiae)-like
220999_s_at	0.988085	1.12951	1.63895	1.69498	CYFIP2	NM_030778	cytoplasmic FMR1 interacting protein 2; synonym: PIR121; p53 inducible protein; Homo sapiens cytoplasmic FMR1 interacting protein 2 (CYFIP2), transcript variant 3, mRNA.
221230_s_at	0.924365	0.917557	0.63534	0.792358	BCAA; BRCAA1; RBP1L1; SAP180; RBBP1L1; MGC163290; DKFZp313M2420	NM_016374	AT rich interactive domain 4B (RBP1-like)
221224_s_at	0.901164	1.09435	1.55023	1.15784	FLJ22955	NM_024819	dephospho-CoA kinase domain containing
221194_s_at	1.16458	1.42975	1.48883	1.50141	LOC51136; MGC111090	NM_016125	PTD016 protein
221258_s_at	0.896219	0.594661	0.375847	0.905902	DKFZP434G2226	NM_031217	kinesin family member 18A
221063_x_at	1.01139	0.986075	1.54557	1.29039	KPC1; FP1477; FLJ12565; MGC163504; DKFZp686C2222	NM_022064	ring finger protein 123
221173_at	1.10212	1.23519	1.43093	1.78559	USH1C	NM_025034
221081_s_at	1.17703	1.35066	1.76795	1.5693	FLJ22457; RP5-1180E21.2	NM_024901	DENN/MADD domain containing 2D
221096_s_at	1.15234	1.3197	1.63618	1.2423	PRO1580; FLJ39769	NM_018502	transmembrane and coiled-coil domains 6
220318_at	1.01725	1.48542	1.55199	1.32429	FLJ20778; MGC129899	NM_017957	epsin 3
220441_at	1.03507	1.36935	1.47173	1.55665	FLJ13236	NM_024902	hypothetical protein FLJ13236
220444_at	0.999852	1.12799	1.46768	1.14623	MGC4054	NM_024341	zinc finger protein 557
220386_s_at	1.12745	1.40179	1.53827	1.56208	C2orf2; ELP120; ROPP120; FLJ10942; FLJ32318; DKFZp686P18118	NM_019063	echinoderm microtubule associated protein like 4
220387_s_at	1.10483	1.23674	1.32091	1.47496	HHLA3	NM_007071	HERV-H LTR-associating 3
220216_at	1.01616	1.20813	1.16809	1.59475	FLJ11267	NM_019607	chromosome 8 open reading frame 44
220235_s_at	0.974179	0.761284	0.640691	0.721929	RIF1; FLJ11269; RP11-96K19.1	NM_018372	chromosome 1 open reading frame 103
220289_s_at	0.949784	1.05185	1.28248	1.598	FLJ10040	NM_017977	absent in melanoma 1-like
220615_s_at	1.12609	1.27935	1.57592	1.60863	FAR2; FLJ10462	NM_018099	male sterility domain containing 1
220617_s_at	1.20002	1.55165	1.49602	1.43938	FLJ10697	NM_018181	zinc finger protein 532
220744_s_at	0.985303	1.35231	1.64071	1.51534	SPG; WDR10; WDR10p; WDR140	NM_018262	intraflagellar transport 122 homolog (Chlamydomonas)
220500_s_at	0.881916	1.37619	1.47601	1.41925	MGC117180	NM_007082	RAB, member of RAS oncogene family-like 2A
220520_s_at	0.911386	1.22227	1.48178	1.76022	FLJ20130; RP13-383K5.2	NM_017681	nucleoporin 62kDa C-terminal like
220553_s_at	1.02513	1.0346	0.635426	0.816464	PRPF39	NM_018333
218757_s_at	0.950889	0.932211	0.549782	0.820606	UPF3X; HUPF3B; RENT3B	NM_023010	UPF3 regulator of nonsense transcripts homolog B (yeast)
218739_at	1.06611	1.26733	1.53671	1.35882	CDS; CGI58; IECN2; NCIE2; MGC8731	NM_016006	abhydrolase domain containing 5
218778_x_at	1.08741	1.52672	1.51469	1.42597	EPS8L1	AI343292	EPS8-like 1
218773_s_at	1.12434	1.31134	1.6261	1.59855	CBS1; MSRB; PILB; CBS-1; CGI-131; MGC26104	NM_012228	methionine sulfoxide reductase B2
218689_at	0.893918	0.844873	0.850081	0.58766	FAF; MGC126856	NM_022725	Fanconi anemia, complementation group F
218683_at	0.844536	0.788	0.480486	0.524761	PTB; MIBP; nPTB; PTBLP; brPTB; nPTB5; nPTB6; nPTB7; nPTB8; FLJ34897	NM_021190	polypyrimidine tract binding protein 2
218719_s_at	1.00039	1.33245	1.76269	1.39137	PSF3; FLJ13912	NM_022770	GINS complex subunit 3 (Psf3 homolog)
218725_at	0.936828	0.974544	0.94773	0.63674	GC1; FLJ13044	NM_024698	solute carrier family 25 (mitochondrial carrier: glutamate), member 22
218877_s_at	0.981651	1.27186	0.965657	1.52831	C6orf75	NM_021820	chromosome 6 open reading frame 75
218885_s_at	0.975375	1.14732	1.43607	1.55581	FLJ21212; GalNAc-T12	NM_024642	UDP-N-acetyl-alpha-D-galactosamine:polypeptide N-acetylgalactosaminyltransferase 12 (GalNAc-T12)
218894_s_at	1.03282	0.971043	0.704608	0.64631	FLJ10292; mago; magoh	NM_018048	mago-nashi homolog 2
218902_at	1.07679	1.29669	1.6122	1.43606	hN1; TAN1	NM_017617	Notch homolog 1, translocation-associated (Drosophila)
218812_s_at	1.19298	1.30964	1.06448	1.5886	TMEM142B	NM_025156	transmembrane protein 142B; synonyms: ORAI2, CBCIP2, C7orf19, FLJ12474, FLJ14733; H_NH0514P08.8; CAP-binding protein complex interacting protein 2; Homo sapiens transmembrane protein 142B (TMEM142B), mRNA.
218813_s_at	1.05719	0.992603	1.35333	1.67168	PP9455; KIAA1848	NM_020145	SH3-domain GRB2-like endophilin B2
218842_at	0.926567	0.784247	0.519009	0.724023	FLJ21908	NM_024604	hypothetical protein FLJ21908
218804_at	0.97651	1.01271	1.15288	1.68117	TAOS2; ORAOV2; FLJ10261	NM_018043	transmembrane protein 16A
218840_s_at	0.83915	1.1101	1.00335	1.446	FLJ10631; FLJ36703; FLJ40627	NM_018161	NAD synthetase 1
218543_s_at	1.10155	1.13147	1.46308	1.37835	ZC3H1; PARP-12; ZC3HDC1; FLJ22693	NM_022750	poly (ADP-ribose) polymerase family, member 12
218545_at	1.0133	0.802096	0.625182	0.779631	p56; HSD8; FLJ11088; DKFZP779L1558; DKFZp779L1558	NM_018318	coiled-coil domain containing 91
218456_at	1.05242	1.25056	1.21063	1.61947	EEG1; EEG-1; C1QDC1; FLJ11391; FLJ22569; caprin-2; MGC102894; MGC134847; MGC134848	NM_023925	caprin family member 2
218440_at	1.10714	1.29071	1.6358	1.52093	MCCA; MCC-B; FLJ25545; DKFZp686B20267	NM_020166	methylcrotonoyl-Coenzyme A carboxylase 1 (alpha)
218487_at	1.07897	1.39425	1.54065	1.54767	PBGS; ALADH; MGC5057	BC000977	aminolevulinate, delta-, dehydratase
218627_at	1.07148	1.12357	1.6346	1.64214	DRAM; FLJ11259	NM_018370	damage-regulated autophagy modulator
218614_at	0.912565	0.790383	0.582242	0.960273	FLJ10652; FLJ20696	NM_018169	chromosome 12 open reading frame 35
218610_s_at	1.19283	0.997604	1.29013	1.51224	FLJ11151; CSTP1	NM_018340	hypothetical protein FLJ11151
218649_x_at	0.859213	0.731137	0.340026	0.625647	NY-CO-1; FLJ10051	NM_004713	serologically defined colon cancer antigen 1
218577_at	0.868551	0.766828	0.513339	0.671865	FLJ20331; dJ677H15.1; RP4-677H15.1	NM_017768	leucine rich repeat containing 40
218602_s_at	1.02984	0.879014	0.564322	0.779651	MGC102696; MGC138798; MGC138799; RP11-296P7.3	NM_017645	family with sequence similarity 29, member A
218585_s_at	1.03291	1.39578	1.44692	1.37029	CDT2; RAMP; DCAF2; L2DTL	NM_016448	denticleless homolog (Drosophila)
218566_s_at	0.832466	0.726492	0.475694	0.492183	CHP1	NM_012124	cysteine and histidine-rich domain (CHORD)-containing 1
218583_s_at	0.967194	0.855285	0.622056	0.826409	RP42; SCRO; Tes3; DCUN1L1	NM_020640	DCN1, defective in cullin neddylation 1, domain containing 1 (S. cerevisiae)
219255_x_at	0.925935	1.27725	1.80377	1.50455	CRL4; EVI27; IL17BR; IL17RH1; MGC5245	NM_018725	interleukin 17 receptor B
219311_at	1.06387	1.20054	1.66836	1.42774	C18orf9; HsT1705; FLJ12542	NM_024899	centrosomal protein 76kDa
219287_at	0.914443	1.03154	1.52768	1.62615	KCNMB4	NM_014505	potassium large conductance calcium-activated channel, subfamily M, beta member 4
219294_at	0.928636	0.850551	0.600233	0.826354	CENP-Q; C6orf139; FLJ10545	NM_018132	centromere protein Q
219202_at	1.01906	1.26658	1.5073	1.36112	RHBDL5; RHBDL6; FLJ22341	NM_024599	rhomboid 5 homolog 2 (Drosophila)
219205_at	0.907187	0.918012	1.55465	1.18622	ILV1; ISO1	NM_021947	serine racemase
219211_at	1.21612	1.39484	1.6305	1.68954	ISG43; UBP43	NM_017414	ubiquitin specific peptidase 18
219188_s_at	1.10515	1.49418	2.01675	1.79297	LRP16	NM_014067	LRP16 protein
219402_s_at	1.12185	1.34325	1.48953	1.28382	DER1; DER-1; MGC3067; PRO2577; FLJ13784; FLJ42092	NM_024295	Der1-like domain family, member 1
219418_at	1.09972	1.42938	1.73646	1.50046	XLF; FLJ12610	NM_024782	nonhomologous end-joining factor 1
219419_at	1.02309	1.28181	1.55256	1.40487	HsT169; FLJ21172	NM_024805	chromosome 18 open reading frame 22
219322_s_at	0.983529	1.15707	1.55732	1.3229	FLJ20430; MGC99569	NM_017818	WD repeat domain 8
219377_at	1.2344	1.21045	1.07383	1.64947	Gm944; C18orf11	NM_022751	family with sequence similarity 59, member A
219372_at	0.914669	0.729623	0.434201	0.605002	CDV1; CDV-1; CDV1R; CDV-1R; MGC4027; MGC102777	NM_014055	intraflagellar transport 81 homolog (Chlamydomonas)
219353_at	0.92541	0.775336	0.541217	0.625549	NHLRC2	NM_017687	NHL repeat containing 2; synonyms: FLJ20147, FLJ25621, FLJ33312, MGC45492, DKFZp779F115; 1200003G01Rik; novel NHL repeat domain containing protein; Homo sapiens NHL repeat containing 2 (NHLRC2), mRNA.
218981_at	0.996708	0.803988	0.660289	0.658923	DC11	NM_020186	ACN9 homolog (S. cerevisiae)
218976_at	0.933194	0.974982	1.48967	1.63178	JDP1; RP11-57G10.2	NM_021800	DnaJ (Hsp40) homolog, subfamily C, member 12
218986_s_at	1.53772	1.62565	1.31679	1.53189	FLJ20035; FLJ10787	NM_017631	hypothetical protein FLJ20035
218988_at	0.92925	1.15436	1.04051	1.53246	BLOV1	NM_018656	solute carrier family 35, member E3
219023_at	1.00293	0.911708	0.638779	0.966137	2C18; GBAR; PRO0971	NM_018569	chromosome 4 open reading frame 16
219029_at	0.945779	0.840333	0.677499	0.654355	FLJ21657; MGC90226; MGC149524	NM_022483	chromosome 5 open reading frame 28
219034_at	1.06217	1.34152	1.52944	1.35068	C15orf30; FLJ20509; FLJ25281	NM_017851	poly (ADP-ribose) polymerase family, member 16
219036_at	0.994329	0.965808	0.553402	0.793231	BITE; FLJ13036	NM_024491	centrosomal protein 70kDa
219016_at	1.09722	1.26088	1.61595	1.11191	FLJ13149; dJ1187M17.5	NM_021826	FAST kinase domains 5
218967_s_at	1.01784	0.965063	0.650443	0.88871	RPR-1	NM_030664	phosphotriesterase related
219138_at	0.97021	0.786436	1.53245	1.2471	L14; RL14; hRL14; CTG-B33; MGC88594; CAG-ISL-7	BC000606	ribosomal protein L14
219174_at	0.937776	0.982091	0.639176	0.815752	CMG1; CCDC2; CMG-1; FLJ22621; MGC111562	NM_025103	intraflagellar transport 74 homolog (Chlamydomonas)
219175_s_at	1.12562	1.07942	1.51387	1.10014	FLJ20473; SLC41A1-L2	NM_017836	solute carrier family 41, member 3
219056_at	1.23811	1.68516	1.54507	1.09102	AGS2; DLEU8; FLJ11712	NM_024570	ribonuclease H2, subunit B
219100_at	0.932662	1.03048	1.28259	1.50352	FLJ22559; bA541N10.2; RP11-541N10.2	NM_024928	oligonucleotide/oligosaccharide-binding fold containing 1
223007_s_at	1.06871	1.41728	1.52492	1.97989	C9orf5	AA495988	Chromosome 9 open reading frame 5
223025_s_at	1.09393	0.892345	1.53307	1.02701	AP47; CLTNM; MU-1A; CLAPM2	AF290613	adaptor-related protein complex 1, mu 1 subunit
223031_s_at	1.02307	1.10434	1.50065	1.06573	RFWD1; RNF119; MGC7807; DKFZp586I021	AL136921	TNF receptor-associated factor 7
222913_at	1.02913	1.18539	1.88415	1.03309	BKLF; MGC48279	AF285837	Kruppel-like factor 3 (basic)
223117_s_at	0.939957	0.768407	0.57755	0.658523	USP47	AW025093	Ubiquitin specific peptidase 47
223092_at	0.926073	1.01778	1.41511	1.48209	ANKH	AA854943	Ankylosis, progressive homolog (mouse)
223098_s_at	1.09734	1.20634	1.47384	1.45518	SIAH1	AA195024	Seven in absentia homolog 1 (Drosophila)
223126_s_at	1.01634	1.24499	1.50521	1.27069	C1orf21	AI159874	Chromosome 1 open reading frame 21
223138_s_at	1.02171	0.93974	0.653769	0.886608	DHX36	AI937206	DEAH (Asp-Glu-Ala-His) box polypeptide 36
223038_s_at	1.06878	1.33339	1.30043	1.6141	FAM60A	BG479856	Family with sequence similarity 60, member A
223078_s_at	0.972153	1.17716	1.07823	1.38108	UTMOD	AF177171	tropomodulin 3 (ubiquitous)
223089_at	1.04038	0.935148	0.562618	0.731038	VEZATIN	AI805297	te32e12.x1 Soares_NFL_T_GBC_S1 Homo sapiens cDNA clone IMAGE:2087662 3', mRNA sequence.
223069_s_at	1.11501	1.41524	1.54478	1.41787	C2orf2; ELP120; ROPP120; FLJ10942; FLJ32318; DKFZp686P18118	AF177377	echinoderm microtubule associated protein like 4
223065_s_at	1.14619	1.0394	1.50498	1.3859	MENTHO; MGC3251	BC003074	STARD3 N-terminal like
222678_s_at	0.990595	1.21696	1.14203	1.43769	DCUN1D1	BF057821	DCN1, defective in cullin neddylation 1, domain containing 1 (S. cerevisiae)
222679_s_at	1.00766	0.987809	0.606587	0.862633	DCUN1D1	AW468880	DCN1, defective in cullin neddylation 1, domain containing 1 (S. cerevisiae)
222726_s_at	0.978198	0.668315	0.46007	0.911349	SEC10L1	BF696912	602129674F1 NIH_MGC_56 Homo sapiens cDNA clone IMAGE:4286178 5', mRNA sequence.
222656_at	0.988771	0.939591	0.585036	0.777714	UBE2W	AI625741	Ubiquitin-conjugating enzyme E2W (putative)
222633_at	0.986283	0.815327	0.616321	0.752834	C21; DC42; IRA1; TBLR1; FLJ12894	AF268193	transducin (beta)-like 1X-linked receptor 1
222644_s_at	1.05028	1.08819	1.68757	1.36748	GLT25D1	AI924150	Glycosyltransferase 25 domain containing 1
222808_at	0.879057	0.604501	0.434905	0.396218	MDS031; GLT28D1; YGL047W	BC005336	asparagine-linked glycosylation 13 homolog (S. cerevisiae)
222805_at	0.960927	0.814153	0.532668	0.984702	MANEA	AI587307	Mannosidase, endo-alpha
222848_at	1.05095	0.873145	0.537019	0.781087	P33; Solt; CENP-K; FKSG14; AF5alpha	BC005400	centromere protein K
222844_s_at	1.07679	1.11968	1.5456	1.20697	ILV1; ISO1	AF169974	serine racemase
222851_at	0.979623	0.866325	0.616632	0.749518	ZNF654	AL120354	Zinc finger protein 654
222830_at	1.01651	1.10079	1.31864	1.61847	TFCP2L2	BE566136	601339250F1 NIH_MGC_53 Homo sapiens cDNA clone IMAGE:3681373 5', mRNA sequence.
222825_at	0.97442	0.767316	0.46605	0.671137	OTUD6B	BF435752	OTU domain containing 6B
222837_s_at	0.955328	0.839054	0.681925	0.623495	Ga19; NATH; TBDN100	AF327722	NMDA receptor regulated 1
222833_at	1.17695	1.39569	1.57165	0.94527	AYTL1	AU154202	Acyltransferase like 1
222730_s_at	1.19663	1.49808	1.49657	1.65368	ZDHHC2	AI814257	Zinc finger, DHHC-type containing 2
222645_s_at	1.08866	1.34266	1.31331	1.36113	KCTD5	AA872593	Potassium channel tetramerisation domain containing 5
222773_s_at	1.00472	1.21248	1.41694	1.71207	GALNT12	AA554045	UDP-N-acetyl-alpha-D-galactosamine:polypeptide N-acetylgalactosaminyltransferase 12 (GalNAc-T12)
222765_x_at	0.941652	0.781716	0.337597	0.664787	C20orf6	AL161659
223457_at	0.980278	1.10006	1.4931	1.45244	2-COP; FLJ11781	AB047847	coatomer protein complex, subunit gamma 2
223493_at	1.18827	1.50018	1.78972	1.7885	FBX4; FLJ10141; DKFZp547N213	AF129534	F-box protein 4
223497_at	0.987407	0.981613	0.601288	0.832865	FLJ13577; KIAA1411; DKFZp781H2319	AL136820	family with sequence similarity 135, member A
223391_at	1.10217	1.26136	1.01057	1.53161	SGPP1	BE880703	Sphingosine-1-phosphate phosphatase 1
223398_at	1.19646	1.22923	1.65421	1.59631	BinCARD; MGC11115; MGC110898; bA370F5.1	BC004500	chromosome 9 open reading frame 89
223400_s_at	0.956887	0.845657	0.586524	0.566607	PB1; BAF180; MGC156155; MGC156156	AF197569	polybromo 1
223397_s_at	0.959827	0.794228	0.765578	0.59069	KD93; CGI-37; HSPC031; FLJ10296	AF161528	nuclear import 7 homolog (S. cerevisiae)
223498_at	0.897945	1.04934	1.39764	1.50605	NSP; FLJ36955; HCMOGT-1	AB041533	sperm antigen with calponin homology and coiled-coil domains 1
223425_at	0.861492	0.568829	0.819206	0.534955	RAVER1	BC002848	Homo sapiens mRNA similar to HLA class II region expressed gene KE2 (cDNA clone IMAGE:3637433).
223626_x_at	1.12965	1.25473	1.51024	1.34008	TLH29; MGC44913	AF208232	family with sequence similarity 14, member A
223608_at	0.978696	0.63754	0.484902	0.363765	FLJ33608; MGC12458; RP11-290P14.1	BC005357	EF-hand calcium binding domain 2
223680_at	1.22026	1.40494	1.08541	1.0629	FLJ14802; MGC13071	BC005085	zinc finger protein 607
223545_at	1.00741	1.2572	1.51589	1.31488	FA4; FAD; FACD; FAD2; FA-D2; FANCD; FLJ23826; DKFZp762A223	AF340183	Fanconi anemia, complementation group D2
223546_x_at	1.11431	1.16619	1.59732	1.1872	SR+89; LUC7B1; FLJ10231; LUC7-LIKE	AY005111	LUC7-like (S. cerevisiae)
223522_at	1.16193	1.43048	1.54725	1.31636	GL012; FLJ22161; DKFZp779O012	AF251293	chromosome 9 open reading frame 45
223535_at	0.933749	0.745542	0.458522	0.705832	DKFZP761I172	AL136592	nudix (nucleoside diphosphate linked moiety X)-type motif 12
223580_at	0.930675	0.880634	0.816047	0.65591	SSB2; GRCC9; SSB-2; MGC2519	BC002983	splA/ryanodine receptor domain and SOCS box containing 2
223227_at	1.04127	1.14421	1.39815	1.5632	BBS; MGC20703	AF342736	Bardet-Biedl syndrome 2
223238_s_at	0.920497	0.672568	0.647554	0.831997	PB1	AF130061	predicted protein of HQ1821; Homo sapiens clone FLB6914 PRO1821 mRNA, complete cds.
223214_s_at	1.01052	0.857105	0.544851	0.932838	ZHX1	AF195766	zinc fingers and homeoboxes 1
223220_s_at	1.20777	1.08011	1.26249	1.57528	BAL; BAL1; FLJ26637; FLJ41418; MGC:7868; DKFZp666B0810; DKFZp686M15238	AF307338	poly (ADP-ribose) polymerase family, member 9
223218_s_at	1.07924	1.43464	1.2858	1.54457	IKBZ; INAP; MAIL; FLJ30225; FLJ34463	AB037925	nuclear factor of kappa light polypeptide gene enhancer in B-cells inhibitor, zeta
223257_at	1.06824	0.79277	0.442051	0.594659	KIAA1333	AI823905	KIAA1333
223263_s_at	1.00095	0.985936	0.612137	1.17004	HSPC123-like; DKFZp564O1863	AF161472	FGFR1 oncogene partner 2
223189_x_at	0.89267	0.968689	0.648016	0.85801	MLL5	AW082219	Myeloid/lymphoid or mixed-lineage leukemia 5 (trithorax homolog, Drosophila)
223352_s_at	1.09998	1.1578	1.42864	1.22451	MIG3; HLC-8; FLJ20721	BC005005	chromosome 17 open reading frame 80
223374_s_at	0.751416	0.784615	0.625693	0.553339	P; P1; GLOB; GLCT3; galT3; Gb4Cer; B3GALT3; beta3Gal-T3	AF154848	beta-1,3-N-acetylgalactosaminyltransferase 1 (globoside blood group)
223381_at	1.00052	0.774724	0.629096	0.88544	CDCA1; NUF2R	AF326731	NUF2, NDC80 kinetochore complex component, homolog (S. cerevisiae)
223384_s_at	1.04399	1.33764	1.45981	1.544	TRIM4	BE501464	Tripartite motif-containing 4
223288_at	0.989886	0.906502	0.659368	0.75435	USP38	AW977401	Ubiquitin specific peptidase 38
223270_at	0.958759	0.745395	0.589163	0.589719	HSPC058; HSPC129; FLJ10523	AF161543	CTD (carboxy-terminal domain, RNA polymerase II, polypeptide A) small phosphatase like 2
223322_at	1.02169	1.18844	1.74163	1.72878	RAPL; Maxp1; NORE1; NORE1A; NORE1B; RASSF3; MGC10823; MGC17344	BC004270	Ras association (RalGDS/AF-6) domain family 5
221772_s_at	1.13791	1.07651	1.57062	1.16688	PPP2R2D	AI138993	Protein phosphatase 2, regulatory subunit B, delta isoform
221779_at	0.79322	0.942895	1.62701	1.28681	MIRAB13; FLJ45921; KIAA1668; MICAL-L1; DKFZp686M2226	BC001090	MICAL-like 1
221810_at	0.98076	1.042	1.05413	1.447	RAB15	AA631242	RAB15, member RAS onocogene family
221731_x_at	1.2302	1.28794	1.42394	2.01327	VCAN	BF218922	Versican
221703_at	0.995302	1.21006	1.00631	1.41495	OF; BACH1; FANCJ; FLJ90232; MGC126521; MGC126523	AF360549	BRCA1 interacting protein C-terminal helicase 1
221763_at	0.91446	0.71154	0.45304	0.787666	JMJD1C	AI694023	Jumonji domain containing 1C
221906_at	0.902494	1.11782	1.05424	1.64999	TXNRD3	BF513089	Thioredoxin reductase 3
221946_at	0.949483	1.59506	1.45184	1.41756	C9orf116	AU160041	Chromosome 9 open reading frame 116
221840_at	1.04995	1.24426	1.49815	1.46652	PTPRE	AA775177	Protein tyrosine phosphatase, receptor type, E
221881_s_at	1.02661	1.38443	1.48725	1.44552	CLIC4	AI638420	Chloride intracellular channel 4
221510_s_at	0.843345	0.735043	0.510865	0.65455	GLS1; FLJ10358; KIAA0838; DKFZp686O15119	AF158555	glutaminase
221499_s_at	0.985221	1.36816	1.37011	1.5517	SYN16; hsyn16; MGC90328	AK026970	syntaxin 16
221549_at	0.906138	0.872521	0.893478	0.619711	GRWD; RRB1; WDR28; KIAA1942	AF337808	glutamate-rich WD repeat containing 1
221478_at	1.11735	1.22213	1.31898	1.72614	NIX; BNIP3a	AL132665	BCL2/adenovirus E1B 19kDa interacting protein 3-like
221479_s_at	1.0464	1.13213	1.4657	1.66012	NIX; BNIP3a	AF060922	BCL2/adenovirus E1B 19kDa interacting protein 3-like
221486_at	1.04139	1.38961	1.79484	1.4891	MGC4319; MGC8394; MGC78563	AF067170	endosulfine alpha
221449_s_at	1.13093	1.25704	1.48929	1.46103	TIP; CDA08	NM_030790	integrin alpha FG-GAP repeat containing 1
221646_s_at	1.01677	1.30755	1.57747	1.52084	ZNF399; FLJ13153	AF267859	zinc finger, DHHC-type containing 11
221650_s_at	1.18882	1.38529	1.4855	1.52078	p28b; FLJ20045	BC002694	mediator of RNA polymerase II transcription, subunit 18 homolog (S. cerevisiae)
221629_x_at	0.877725	0.694397	0.624108	0.582674	FLJ40907	AF151022	chromosome 8 open reading frame 30A
221634_at	0.955353	0.582842	0.773634	0.606093	RPL23AL1; bA395L14.9	BC000596	ribosomal protein L23a pseudogene 7
221696_s_at	1.03326	1.18637	1.57176	1.35849	NOK; SuRTK106; DKFZp761P1010	AF251059	serine/threonine/tyrosine kinase 1
221640_s_at	1.09756	1.32379	1.64746	1.2699	PIDD; MGC16925; DKFZp434D229	AF274972	leucine-rich repeats and death domain containing
221562_s_at	1.10547	1.21792	1.59493	1.26287	SIR2L3	AF083108	sirtuin (silent mating type information regulation 2 homolog) 3 (S. cerevisiae)
222478_at	0.94467	0.880268	0.604924	0.661624	VPS36	AL576924	Vacuolar protein sorting 36 homolog (S. cerevisiae)
222392_x_at	1.04574	1.26718	1.62028	1.64368	THW; KCP1; PIGPC1; KRTCAP1; dJ496H19.1; RP3-496H19.1	AJ251830	PERP, TP53 apoptosis effector
222371_at	0.981949	0.839593	0.586743	0.820108	RARA	AI732802	ab23e08.x5 Stratagene lung (#937210) Homo sapiens cDNA clone IMAGE:841670 3' similar to contains element MER6 repetitive element ;, mRNA sequence.
222413_s_at	1.03632	1.54027	0.954797	1.35604	MLL3	AW137099	Myeloid/lymphoid or mixed-lineage leukemia 3
222395_s_at	1.04127	1.14418	1.50084	1.20116	UBE2Z	BE544096	Ubiquitin-conjugating enzyme E2Z (putative)
222402_at	0.988218	0.815465	0.518542	0.588117	UMP1; HSPC014; C13orf12; PNAS-110	BC003390	proteasome maturation protein
222574_s_at	1.00039	1.16535	1.36035	1.49852	DHX40	BF431360	DEAH (Asp-Glu-Ala-His) box polypeptide 40
222557_at	1.08405	1.17099	1.48283	1.2918	STMN3	AL353715
223307_at	0.968188	0.635189	0.814141	0.689033	GRCC8; TOME-1; MGC2577	BC002551	cell division cycle associated 3
222580_at	0.987799	0.909096	0.618495	0.834422	Zep-2; BM-005; KIAA1221; MGC60165; MGC70410	AK023596	zinc finger protein 644
222585_x_at	1.17566	1.36459	1.18102	1.5274	KRCC1	BE326678	Lysine-rich coiled-coil 1
222586_s_at	1.08844	1.57305	1.43182	1.48616	OSBPL11	AI884890	Oxysterol binding protein-like 11
222587_s_at	0.931976	0.843331	0.539805	0.74787	GALNT7	BF699855	602127301F1 NIH_MGC_56 Homo sapiens cDNA clone IMAGE:4284168 5', mRNA sequence.
222487_s_at	1.12686	1.05966	1.48306	1.37577	RPS27L	BC003667	ribosomal protein S27-like
222494_at	1.13432	1.22037	1.48728	1.47998	FOXN3	AW051527	Forkhead box N3
222523_at	1.07931	1.28575	1.54543	1.35646	SENP2	BE622841	601441191T1 NIH_MGC_72 Homo sapiens cDNA clone IMAGE:3916031 3', mRNA sequence.
222151_s_at	0.965222	0.823392	0.6125	0.680585	FLJ13386; MGC78416	AK023738	centrosomal protein 63kDa
222122_s_at	0.896426	0.903571	0.515952	0.840686	THOC2	BG403671	THO complex 2
222133_s_at	0.953198	0.877009	0.580424	0.971648	CGI-72; MGC64923	AK022280	PHD finger protein 20-like 1
222006_at	0.883839	0.857878	0.794156	0.602641	LETM1	AI359368	Leucine zipper-EF-hand containing transmembrane protein 1
221999_at	1.09062	1.15093	1.50025	1.20574	VRK3	BF062886	Vaccinia related kinase 3
222286_at	0.87595	0.728967	0.366929	0.631927	PSIP1	R43279	CDNA: FLJ20863 fis, clone ADKA01804
222341_x_at	0.889228	0.936554	0.558241	0.882963	AHR	AW973235	Transcribed locus
222309_at	0.875107	0.745766	0.56705	0.359869	C6orf62	AW972292	Chromosome 6 open reading frame 62
222313_at	0.67657	0.706992	0.280658	0.806989	RPL22	AW972359	Transcribed locus
222317_at	0.548534	0.536676	0.464937	0.373804	PDE3B	AA888858	Phosphodiesterase 3B, cGMP-inhibited
222196_at	0.912126	0.881626	0.552529	0.937233	LOC286434	AK000470	hypothetical protein LOC286434
222201_s_at	0.951241	0.971652	0.640507	0.920918	CED-4; FLASH; RIP25; FLJ11208; KIAA1315	AB037736	CASP8 associated protein 2
222038_s_at	1.16724	1.08572	1.44074	1.49816	NME1	AA993099	Non-metastatic cells 1, protein (NM23A) expressed in
222240_s_at	0.965584	1.13973	1.45919	1.59442	ISYNA1	AL137749	myo-inositol 1-phosphate synthase A1
222227_at	0.753679	0.544982	0.507126	0.493539	ZNF236	AK000847	unnamed protein product; Homo sapiens cDNA FLJ20840 fis, clone ADKA02336.
239202_at	1.03097	1.12295	1.26751	1.48415	RAB3B	BE552383	CDNA FLJ34848 fis, clone NT2NE2011684, weakly similar to H.sapiens mRNA for plakophilin 2a and b
239252_at	0.848367	0.966268	1.53221	1.26288	COX7B	AA911561	Transcribed locus
239143_x_at	1.03154	0.967326	0.626679	0.679659	RNF138	AW291944	Ring finger protein 138
239540_at	1.16551	1.50739	1.49308	1.22104	GTF3C1	AI671903	wb41d10.x1 NCI_CGAP_GC6 Homo sapiens cDNA clone IMAGE:2308243 3', mRNA sequence.
239288_at	1.01724	1.14657	1.34911	1.50466	TNIK	BF431017	TRAF2 and NCK interacting kinase
239381_at	1.07293	1.18387	1.41168	1.35582	KLK7	AU155415	Kallikrein-related peptidase 7
238783_at	0.845304	0.732828	0.463096	0.694177	TMEM161B	AA213701	Transmembrane protein 161B
238756_at	1.01259	0.542317	0.562611	0.694368	LOC283431	AI860012	Transcribed locus
238757_at	0.9428	0.622062	0.778531	0.795617	DBF4B	AW290902	DBF4 homolog B (S. cerevisiae)
238813_at	1.03916	1.19425	1.40063	1.61963	APEX2	AI910842	Transcribed locus
238824_at	1.00511	1.13416	1.45285	1.50692		BF844863	CDNA FLJ30581 fis, clone BRAWH2007069
238675_x_at	1.19049	1.2457	1.54987	1.12664	MGC23908	AV757441	Transcribed locus
238689_at	1.23888	1.15317	1.26456	1.10299	GPR110	BG426455	G protein-coupled receptor 110
238729_x_at	1.08706	0.540237	0.99177	0.607223	SAV1	BF983202	Transcribed locus
238806_at	0.965183	0.634036	0.711142	0.763845		AA456945	Transcribed locus
238700_at	0.893032	0.714016	0.716683	0.636294	MIZ1	AI825302	Transcribed locus
238960_s_at	1.03381	1.24943	1.08561	1.58486	LARP4	AI082828	La ribonucleoprotein domain family, member 4
239049_at	1.19599	1.37164	1.66816	1.94975		BF514509	UI-H-BW1-anf-g-03-0-UI.s1 NCI_CGAP_Sub7 Homo sapiens cDNA clone IMAGE:3082180 3', mRNA sequence.
239047_at	1.08563	1.20406	1.55511	1.55535	FAM122C	AW028188	Family with sequence similarity 122C
238868_at	0.757424	0.701728	0.477826	1.01934	UACA	AW264269	Uveal autoantigen with coiled-coil domains and ankyrin repeats
238879_at	0.984371	0.921805	0.556366	0.815407	RP42	R11899	CDNA FLJ38454 fis, clone FEBRA2019690
238717_at	1.08264	1.39764	1.1864	1.40958	LOC729137	BE295812	Hypothetical protein LOC729137
238846_at	1.02082	1.24944	1.36423	1.62598	TNFRSF11A	AW026379	Tumor necrosis factor receptor superfamily, member 11a, NFKB activator
238912_x_at	0.936933	1.02802	1.08547	1.54991	C9orf85	AA824363	Chromosome 9 open reading frame 85
238886_at	1.05022	1.27534	1.4905	1.07703	TMED10	BF056141	Transmembrane emp24-like trafficking protein 10 (yeast)
240421_x_at	1.11143	1.65942	1.69634	1.1399	GYPA	AI693524	Transcribed locus, moderately similar to XP_001080429.1 similar to salvador homolog 1 [Rattus norvegicus]
240436_at	1.04892	1.85592	1.68343	1.46251	LOC729697	AA688101	Hypothetical protein LOC729697
240592_at	0.930042	0.550883	0.49637	0.691154	LCORL	AI939336	Ligand dependent nuclear receptor corepressor-like
240467_at	1.15853	1.06228	1.13759	1.76788		AA947873	ok21h03.s1 Soares_NSF_F8_9W_OT_PA_P_S1 Homo sapiens cDNA clone IMAGE:1508501 3', mRNA sequence.
240238_at	1.12712	1.49693	1.73018	0.942416	TBC1D22A	AI597838	tu53a07.x1 NCI_CGAP_Pr28 Homo sapiens cDNA clone IMAGE:2254740 3', mRNA sequence.
240241_at	1.08988	1.80998	1.95686	1.82971	MAPKAP1	AW511271	hd22e10.x1 Soares_NFL_T_GBC_S1 Homo sapiens cDNA clone IMAGE:2910282 3', mRNA sequence.
240307_at	1.01102	0.829267	0.50685	0.805997	FUBP1	N54783	yv31a03.s1 Soares fetal liver spleen 1NFLS Homo sapiens cDNA clone IMAGE:244300 3', mRNA sequence.
240983_s_at	1.12243	1.22892	1.2879	1.22583	CARS	AW292273	Cysteinyl-tRNA synthetase
241060_x_at	0.802164	0.764991	0.384052	0.842107		H37807	yp57c03.s1 Soares fetal liver spleen 1NFLS Homo sapiens cDNA clone IMAGE:191524 3' similar to contains L1 repetitive element ;, mRNA sequence.
241017_at	1.28459	1.44109	1.30736	1.05618	RPL31	AA779927	Ribosomal protein L31
240824_at	1.13537	1.47521	1.34341	1.57588	C21orf59	AI076185	oz01f11.x1 Soares_fetal_liver_spleen_1NFLS_S1 Homo sapiens cDNA clone IMAGE:1674093 3', mRNA sequence.
239721_at	1.08631	1.53864	1.25556	1.39484	UBE2H	AI280328	qm68f10.x1 Soares_placenta_8to9weeks_2NbHP8to9W Homo sapiens cDNA clone IMAGE:1893931 3', mRNA sequence.
239725_at	1.24032	1.09297	1.18784	1.74054	PGAP1	T90703	GPI deacylase
239784_at	1.22217	1.05299	1.60421	1.14023	VIM	AA398740	zt75f06.s1 Soares_testis_NHT Homo sapiens cDNA clone IMAGE:728195 3', mRNA sequence.
239596_at	0.799644	0.901083	0.564053	0.828518	SLC30A7	AA521381	Solute carrier family 30 (zinc transporter), member 7
239672_at	0.996602	0.864948	0.437649	1.03393	ADAMTS8	AW960100	CDNA FLJ38472 fis, clone FEBRA2022148
239657_x_at	1.00071	1.11149	1.44943	1.59878	FOXO6	AI341823	forkhead box protein O6
240111_at	0.884839	1.45351	1.1193	1.41786	RHOBTB3	H01893	Rho-related BTB domain containing 3
236660_at	1.09664	1.03907	0.601717	0.951468		N25555	yx76g01.s1 Soares melanocyte 2NbHM Homo sapiens cDNA clone IMAGE:267696 3', mRNA sequence.
236679_x_at	0.836734	0.626163	0.788921	0.764466		AA846096	ak83e11.s1 Barstead spleen HPLRB2 Homo sapiens cDNA clone IMAGE:1414508 3', mRNA sequence.
236766_at	1.11455	1.47998	1.07792	1.50238	C8orf38	BE735175	Chromosome 8 open reading frame 38
236535_at	0.958297	0.968593	0.576009	0.762652	SMC6	AW069285	Structural maintenance of chromosomes 6
236518_at	1.00445	0.891382	0.721402	0.634628	C9orf86	BE208843	Chromosome 9 open reading frame 86
236989_at	0.932384	0.858367	0.645438	0.875673	EIF3S6	AW293012	Transcribed locus
236937_at	0.977452	0.675172	0.663906	0.580237	VPS8	BF108423	Vacuolar protein sorting 8 homolog (S. cerevisiae)
236953_s_at	1.14615	1.61006	0.5973	1.09958	RP11-50D16.3	N25548	Similar to RIKEN cDNA 8030451K01
237065_s_at	1.05736	1.3643	1.51393	1.42073		BF444997	Transcribed locus, strongly similar to NP_006393.2 B virus x-interacting protein [Homo sapiens]
237107_at	0.913807	0.793221	0.468392	0.803312	PRKRA	AA279462	Protein kinase, interferon-inducible double stranded RNA dependent activator
237040_at	1.10339	0.760311	0.396745	0.766626	CWF19L2	BF185264	CWF19-like 2, cell cycle control (S. pombe)
236923_x_at	0.955641	0.827341	0.753224	0.628873		W90039	zh69g09.s1 Soares_fetal_liver_spleen_1NFLS_S1 Homo sapiens cDNA clone IMAGE:417376 3' similar to contains Alu repetitive element;, mRNA sequence.
236129_at	1.04618	1.08548	1.30715	1.55336	GALNT5	BF002195	UDP-N-acetyl-alpha-D-galactosamine:polypeptide N-acetylgalactosaminyltransferase 5 (GalNAc-T5)
236079_at	1.024	1.87702	1.59315	1.81298	DKFZp667E0512	AA649070	Transcribed locus
236140_at	1.07864	0.85896	0.687873	0.48892	GCLM	AI753488	Glutamate-cysteine ligase, modifier subunit
236160_at	0.848011	0.56253	0.370832	0.804419	TRIP11	AA765470	Transcribed locus
236010_at	0.952709	1.58796	0.80434	1.14848	SH3D19	AI373107	Transcribed locus
235969_at	0.920231	0.885135	0.521961	0.768109	FLJ33996	R40373	yf81g08.s1 Soares infant brain 1NIB Homo sapiens cDNA clone IMAGE:28927 3', mRNA sequence.
235988_at	1.346	1.28807	1.48627	1.20336	GPR110	AA746038	G protein-coupled receptor 110
236045_x_at	1.15152	1.16885	1.55608	1.59081		AW451197	Transcribed locus
236385_at	0.988421	1.31112	1.53509	1.89014	DKFZP434L187	BF000203	Transcribed locus
236356_at	1.00028	1.02989	1.07414	1.00388	NDUFS1	AI808395	NADH dehydrogenase (ubiquinone) Fe-S protein 1, 75kDa (NADH-coenzyme Q reductase)
236381_s_at	0.98093	1.06529	1.43453	1.34746	WDR8	AW572779	WD repeat domain 8
236476_at	1.04733	0.854111	0.68901	0.469676	PFDN1	AW779983	CDNA FLJ38567 fis, clone HCHON2005166
236486_at	0.854008	0.645599	0.91172	0.860984		AW771570	hn58e01.x1 NCI_CGAP_Kid11 Homo sapiens cDNA clone IMAGE:3032088 3' similar to contains Alu repetitive element;contains element MER18 repetitive element ;, mRNA sequence.
236453_at	1.00333	1.43479	1.41299	1.86582	LOC643519	AW243154	Transcribed locus
236251_at	0.854147	1.05196	0.541313	1.01462	ITGAV	AA228366	Transcribed locus
236321_at	0.947276	1.08504	0.762864	0.544241	LOC285550	AW439843	Hypothetical protein LOC285550
236283_x_at	0.982894	0.755666	0.610218	0.522378	PAK2	AA287921	Transcribed locus
238421_at	0.890102	0.760701	0.589341	0.882841	RC3H2	N86386	Ring finger and CCCH-type zinc finger domains 2
238425_at	1.00181	0.876018	0.64996	0.686806		BG028041	602295767F1 NIH_MGC_86 Homo sapiens cDNA clone IMAGE:4390289 5', mRNA sequence.
238342_at	1.258	2.27591	1.94595	1.82565		BF677084	602086629F1 NIH_MGC_83 Homo sapiens cDNA clone IMAGE:4250958 5', mRNA sequence.
238468_at	0.965994	0.688662	0.58768	0.713857	TNRC6B	AA214704	Trinucleotide repeat containing 6B
238462_at	1.062	1.07598	1.23276	1.49517	STS-1	AI418293	Cbl-interacting protein Sts-1
238474_at	1.07757	1.29545	1.44816	1.44489	NUP43	BF978064	Nucleoporin 43kDa
238443_at	0.982357	1.16691	0.739759	1.52777	TFAM	BE546873	601073908F1 NIH_MGC_12 Homo sapiens cDNA clone IMAGE:3460081 5', mRNA sequence.
238146_at	1.08285	0.921628	0.524776	0.824435	FAM82B	AA836641	Family with sequence similarity 82, member B
238311_at	1.18312	1.49692	1.17629	1.54394	TSPYL1	BF940192	Transcribed locus
238229_at	1.22663	1.37057	1.13632	1.51094	TMEM67	AI187388	Transmembrane protein 67
238601_at	1.04482	1.31656	1.55994	1.4999	PHKB	AI798207	Transcribed locus
238598_s_at	1.02154	1.249	1.4946	1.78681	CD79B	BE962709	CDNA FLJ44201 fis, clone THYMU3000841
238565_at	0.994365	1.06097	0.605089	0.854593		BE348291	hw16a05.x1 NCI_CGAP_Lu24 Homo sapiens cDNA clone IMAGE:3183056 3', mRNA sequence.
238633_at	0.998954	0.869189	0.79923	0.590866	EPC1	W93523	Enhancer of polycomb homolog 1 (Drosophila)
238649_at	1.07781	1.37562	1.56343	1.96125	PITPNC1	AA815089	Phosphatidylinositol transfer protein, cytoplasmic 1
238587_at	1.05236	1.39844	1.78601	1.6325	STS-1	AI927919	Cbl-interacting protein Sts-1
238620_at	1.05235	1.31293	0.92488	1.41768	HMGA1	AA678564	Transcribed locus
238506_at	1.0305	1.2561	0.600001	0.892818	LRRC58	BG285274	Leucine rich repeat containing 58
238508_at	0.875674	0.636009	1.39544	0.873956	DBF4B	BG026951	DBF4 homolog B (S. cerevisiae)
238545_at	0.874818	0.65388	0.857985	0.606582	BRD7	AA214369	Bromodomain containing 7
238562_at	0.958554	0.890349	0.58205	0.793567	C8orf53	BE542779	Chromosome 8 open reading frame 53
238563_at	0.940587	0.903934	0.62336	0.860245	ABI1	AV762916	Transcribed locus
237464_at	1.00166	0.849494	0.701824	0.617463	IMAA	AI241501	Transcribed locus
237346_at	1.18359	1.50878	1.10535	1.68689	TGDS	AA976208	TDP-glucose 4,6-dehydratase
237301_at	0.865189	0.718367	0.600862	0.747226		BF433570	Transcribed locus
237302_at	1.03071	0.635463	0.60133	0.658353		BF445031	Transcribed locus
238057_at	1.00256	0.927523	0.453909	0.936584	USP45	AW195800	Ubiquitin specific peptidase 45
238066_at	1.06092	1.15763	1.4635	1.52292	RBP7	AI733027	Retinol binding protein 7, cellular
238119_at	0.933396	0.677753	0.383962	0.723618	GL004	AW665321	Transcribed locus
238012_at	0.951888	0.870886	0.694268	0.523539	DPP7	AI620209	Dipeptidyl-peptidase 7
238017_at	0.583615	0.522985	0.7706	0.764735	RDHE2	AI440266	Epidermal retinal dehydrogenase 2
237999_at	0.840443	1.03018	0.363165	1.19746	CRX	AW195867	xn86b03.x1 Soares_NFL_T_GBC_S1 Homo sapiens cDNA clone IMAGE:2701325 3', mRNA sequence.
244519_at	0.960225	0.820889	0.881303	0.621668	ASXL1	AI829840	Additional sex combs like 1 (Drosophila)
244661_at	1.20124	1.049	1.20277	1.56401		AA946876	Transcribed locus
244396_at	1.18527	1.22274	0.985477	1.61375	G3BP	BE673925	Transcribed locus
244324_at	1.03696	0.97073	0.872692	0.601443	MGC33382	BG283921	602407676F1 NIH_MGC_91 Homo sapiens cDNA clone IMAGE:4519747 5', mRNA sequence.
244350_at	1.09859	1.41742	1.44379	1.44865		N33403	yy41d10.s1 Soares melanocyte 2NbHM Homo sapiens cDNA clone IMAGE:273811 3' similar to contains Alu repetitive element;contains element PTR5 repetitive element ;, mRNA sequence.
244490_at	0.998596	1.12104	0.65778	1.26786		AA748520	MRNA; cDNA DKFZp686B0610 (from clone DKFZp686B0610)
244441_at	0.922837	0.682486	0.717156	0.493113	USP31	AI128170	Transcribed locus
244447_at	1.03844	1.17873	1.35973	1.63105	DMD	AW292830	Transcribed locus
32088_at	1.12825	0.931761	0.587655	0.783033	JEM1; JEM-1; JEM-1s; MGC22497; GOLGIN-45	U79751	basic leucine zipper nuclear factor 1 (JEM-1)
32062_at	0.982512	1.34626	1.49015	1.12068	KIAA0014	D25216	leucine rich repeat containing 14
244743_x_at	0.831164	0.783698	0.488823	0.634211	ZNF138	AA114243	Zinc finger protein 138
244764_at	1.19811	1.22987	1.31062	1.61027	HIVEP3	BG250907	Homo sapiens, clone IMAGE:5180231, mRNA
243724_at	1.04879	1.57266	1.74088	1.79358		AW979182	Transcribed locus
243852_at	1.01873	0.940796	0.717485	0.661735	LUC7L2	AI963460	Transcribed locus
243856_at	1.00802	0.628525	0.87671	0.767105		AW450206	Transcribed locus
243558_at	0.902998	1.62056	0.939221	1.25004		AI040122	ox08g03.x1 Soares_fetal_liver_spleen_1NFLS_S1 Homo sapiens cDNA clone IMAGE:1655764 3', mRNA sequence.
243683_at	0.988821	0.956696	0.64594	1.00987	MORF4L2	H43976	Mortality factor 4 like 2
243664_at	1.01021	0.721327	0.619381	0.902586	TXNL1	AA629944	Thioredoxin-like 1
243624_at	0.940939	0.860163	0.643948	0.720736	PIAS2	AW195579	Protein inhibitor of activated STAT, 2
244177_at	1.05801	1.18153	1.54426	1.293		BE671727	Transcribed locus
244190_at	1.01764	0.880559	0.544526	0.808794	THAP5	AI878997	THAP domain containing 5
244271_at	1.04969	1.43662	1.65376	1.14405		AI697709	Transcribed locus
244290_at	0.708874	0.604753	0.305374	0.572342	IMMP2L	AW293174	Transcribed locus
244317_at	1.0912	1.52937	1.83247	1.46107	KIAA1324L	BF035563	KIAA1324-like
244298_at	0.923049	0.614997	0.838945	0.892354	MAP2K5	AA702999	zi81e08.s1 Soares_fetal_liver_spleen_1NFLS_S1 Homo sapiens cDNA clone IMAGE:447206 3', mRNA sequence.
244320_at	0.96155	1.04913	0.655325	0.69125	NHLRC2	BE046449	NHL repeat containing 2
244219_at	1.13105	1.1976	0.649923	0.905526	WTAP	AI613089	Transcribed locus
244246_at	1.00167	0.693644	0.583078	0.763127	MIPOL1	AI953589	Mirror-image polydactyly 1
243916_x_at	0.836747	0.587018	0.310769	0.465393	UBLCP1	H73636	Ubiquitin-like domain containing CTD phosphatase 1
243943_x_at	1.16143	1.45188	1.66048	1.15266	C6orf52	AW001000	Chromosome 6 open reading frame 52
244093_at	0.953643	0.59175	0.93067	0.87406	MTR	AI523913	tg98a06.x1 NCI_CGAP_CLL1 Homo sapiens cDNA clone IMAGE:2116786 3', mRNA sequence.
244075_at	1.01856	1.36203	1.12613	1.59503	RPL34	BF224218	7q74f02.x1 NCI_CGAP_Lu24 Homo sapiens cDNA clone IMAGE:3704187 3', mRNA sequence.
244007_at	0.937513	0.894862	0.622973	0.833908		BE889301	Transcribed locus
58900_at	0.811875	0.791877	0.582191	0.565763	LOC222070	AW025284	Hypothetical protein LOC222070
55081_at	1.2095	1.41188	1.4558	1.51814	MICALL1	W46406	MICAL-like 1
60815_at	1.05096	1.40666	1.44128	1.71642	LOC441257	AA601208	Hypothetical LOC441257
59631_at	0.955752	0.963236	1.51691	1.22915	TXNRD3	AI247566	Thioredoxin reductase 3
49679_s_at	1.08255	1.21422	1.55672	1.09097	MMP24	AA243774	Matrix metallopeptidase 24 (membrane-inserted)
51192_at	1.06347	1.25373	1.5333	1.55326	SSH3	AA134926	Slingshot homolog 3 (Drosophila)
53720_at	1.25942	1.47577	1.50336	1.74342	FLJ11286	AI862559	Hypothetical protein FLJ11286
51774_s_at	0.9185	0.786948	0.732127	0.610988	LOC222070	AW014299	Hypothetical protein LOC222070
AFFX-HUMISGF3A/M97935_MA_at	1.06463	1.18138	1.28413	1.54595	STAT1	AFFX-HUMISGF3A/M97935_MA
AFFX-HUMRGE/M10098_3_at	1.21615	1.24479	1.65973	1.15623		AFFX-HUMRGE/M10098_3
AFFX-HUMISGF3A/M97935_5_at	0.901779	1.33915	1.39669	1.77075	STAT1	AFFX-HUMISGF3A/M97935_5
AFFX-LysX-5_at	1.0532	1.27736	2.1384	1.28737		AFFX-LysX-5
AFFX-LysX-M_at	0.99674	1.21817	1.67879	1.06112		AFFX-LysX-M
AFFX-LysX-3_at	0.923686	1.04201	1.4314	1.07121		AFFX-LysX-3
AFFX-DapX-3_at	0.97047	1.09235	1.73838	1.02817		AFFX-DapX-3
AFFX-DapX-5_at	1.04279	1.20001	1.91314	1.28043		AFFX-DapX-5
AFFX-DapX-M_at	0.984969	1.11264	1.6819	1.08383		AFFX-DapX-M
AFFX-r2-Bs-thr-5_s_at	1.10935	1.23454	2.2575	1.38091		AFFX-r2-Bs-thr-5
AFFX-r2-Bs-thr-M_s_at	1.07783	1.23905	2.25121	1.46679		AFFX-r2-Bs-thr-M
AFFX-ThrX-3_at	0.935345	1.11242	2.05499	1.03282		AFFX-ThrX-3
AFFX-ThrX-5_at	1.12022	1.37609	3.00492	1.46997		AFFX-ThrX-5
AFFX-ThrX-M_at	0.930824	1.19331	2.08784	1.19473		AFFX-ThrX-M
AFFX-PheX-M_at	0.889482	0.891929	1.61918	0.923806		AFFX-PheX-M
AFFX-r2-Bs-dap-3_at	0.868174	0.9594	1.4296	0.893137		AFFX-r2-Bs-dap-3
AFFX-r2-Bs-dap-5_at	1.11691	1.3434	2.27182	1.3968		AFFX-r2-Bs-dap-5
AFFX-PheX-3_at	0.990352	1.16242	1.95544	1.1383		AFFX-PheX-3
AFFX-PheX-5_at	1.0433	1.14859	2.11302	1.07253		AFFX-PheX-5
AFFX-r2-Bs-dap-M_at	0.905265	0.925986	1.53905	0.946883		AFFX-r2-Bs-dap-M
AFFX-r2-Bs-phe-3_at	0.928124	1.0119	1.48357	0.924345		AFFX-r2-Bs-phe-3
AFFX-r2-Bs-phe-5_at	1.01728	1.58266	2.24908	1.24096		AFFX-r2-Bs-phe-5
AFFX-r2-Bs-phe-M_at	0.97632	1.05553	1.49411	0.951402		AFFX-r2-Bs-phe-M
AFFX-r2-Bs-lys-3_at	1.04282	1.3295	1.73772	1.04561		AFFX-r2-Bs-lys-3
AFFX-r2-Bs-lys-5_at	1.12422	1.48925	2.61069	1.34371		AFFX-r2-Bs-lys-5
AFFX-r2-Bs-lys-M_at	0.803213	1.09009	1.73486	0.881509		AFFX-r2-Bs-lys-M
65521_at	0.921445	0.664366	0.859282	0.644267	LOC51619	W74577	zd56g04.r1 Soares_fetal_heart_NbHH19W Homo sapiens cDNA clone IMAGE:344694 5', mRNA sequence.
52975_at	0.977728	0.894967	0.797251	0.561263	FAM125B	AA534894	Family with sequence similarity 125, member B
AFFX-r2-Bs-thr-3_s_at	0.888139	1.05584	1.70093	0.950363		AFFX-r2-Bs-thr-3
36742_at	1.29031	1.29386	1.50197	1.94511	RNF93; ZNFB7; ZNF178	U34249	tripartite motif-containing 15
37802_r_at	0.983288	0.826684	0.605099	0.711198	KIAA1164	AL049226	family with sequence similarity 63, member B
35179_at	0.860277	0.768451	0.888493	0.628426	GLCATI; GlcAT-I	AB009598	beta-1,3-glucuronyltransferase 3 (glucuronosyltransferase I)
36129_at	1.03015	1.23275	1.67635	1.63522	SGSM2; KIAA0397	AB007857	RUN and TBC1 domain containing 1
36553_at	1.20459	1.24308	1.47019	1.41862	ASMTL	AA669799	Acetylserotonin O-methyltransferase-like
35666_at	1.06449	1.15901	1.47751	1.2807	SEMA4; SEMAK; SEMA-IV; sema IV	U38276	sema domain, immunoglobulin domain (Ig), short basic domain, secreted, (semaphorin) 3F
41386_i_at	0.775782	0.702384	0.655135	0.605945	KIAA0346	AB002344	jumonji domain containing 3
41856_at	1.00443	1.01565	1.49684	1.27435	UNC5B	AL049370	Full-length cDNA clone CL0BB018ZE07 of Neuroblastoma of Homo sapiens (human)
44783_s_at	1.06711	1.35626	1.47082	1.56037	HEY1	R61374	Hairy/enhancer-of-split related with YRPW motif 1
39582_at	1.28866	1.94062	1.90742	1.82456	EAC; CDMT; CYLD1; CYLDI; USPL2; HSPC057; FLJ20180; FLJ31664; KIAA0849	AL050166	cylindromatosis (turban tumor syndrome)
40020_at	1.15175	1.16734	1.40804	1.37906	FMI1; EGFL1; HFMI1; MEGF2; CDHF11; RESDA1	AB011536	cadherin, EGF LAG seven-pass G-type receptor 3 (flamingo homolog, Drosophila)
242110_at	1.03372	0.945137	0.54567	1.0068		AV735587	AV735587 CB Homo sapiens cDNA clone CBDAAD08 5', mRNA sequence.
242190_at	1.0449	0.88507	0.803219	0.643898	SDAD1	AA768015	SDA1 domain containing 1
242136_x_at	0.943785	0.767909	0.713746	0.436298	MGC70870	T66145	Hypothetical LOC403340
242140_at	1.17806	1.48757	1.43825	1.08738	LOC113386	AA635618	Similar to envelope protein, mRNA (cDNA clone MGC:16737 IMAGE:4129886)
241996_at	1.14003	1.62068	1.0594	1.22712	RUFY2	AI669591	RUN and FYVE domain containing 2
242045_at	1.21674	1.71552	1.33432	1.53016	ANKRD18A	AI457235	Ankyrin repeat domain 18A
242048_at	1.08684	1.27351	1.41375	0.768016	PFDN6	BE905316	Prefoldin subunit 6
242059_at	0.733473	0.738394	0.46263	1.00247	ETNK1	AW976631	Transcribed locus
242019_at	0.870244	1.1847	1.21393	1.6077	LASS6	BG257755	LAG1 homolog, ceramide synthase 6 (S. cerevisiae)
242321_at	1.09977	1.3194	1.52427	1.59079	C6orf106	AI628689	Full length insert cDNA clone ZE03F06
242376_at	1.02214	1.21623	1.56958	1.18758		AI356095	Transcribed locus
242232_at	1.00358	0.845755	1.08171	0.552675		AI652864	wb40b10.x1 NCI_CGAP_GC6 Homo sapiens cDNA clone IMAGE:2308123 3', mRNA sequence.
242304_at	0.979934	0.855324	0.656787	0.548755	WIBG	AI377416	Within bgcn homolog (Drosophila)
242294_at	1.03154	1.22506	1.46869	1.52948		AA973128	Transcribed locus
242305_at	1.09194	1.47738	1.51291	1.47886	LOC645513	AL518943	Similar to septin 7
242289_at	0.908908	0.740763	0.532094	0.686027		AW962413	EST374486 MAGE resequences, MAGG Homo sapiens cDNA, mRNA sequence.
242292_at	1.21113	1.46736	1.6522	2.00828	hCG_1731871	H12084	HCG1731871
241466_at	0.955412	0.862634	0.578001	0.916218	TIRAP	AI275776	Transcribed locus
241474_at	0.843762	0.682588	0.633806	0.649584		AA928233	on87b02.s1 Soares_NFL_T_GBC_S1 Homo sapiens cDNA clone IMAGE:1563627 3', mRNA sequence.
241607_at	0.880084	0.990384	1.27767	1.62339	LZTR2	BF382808	Leucine zipper transcription regulator 2
241356_at	1.40521	2.10956	2.14512	2.09829		BG290650	Transcribed locus
241443_at	1.00488	0.630118	0.620605	0.807517		AW304871	xv96f07.x1 NCI_CGAP_Brn53 Homo sapiens cDNA clone IMAGE:2826373 3' similar to contains Alu repetitive element;, mRNA sequence.
241412_at	1.02563	1.11282	0.807578	1.47944	BTC	AI620677	Betacellulin
241863_x_at	0.970516	0.746703	0.471505	0.764714		AA703326	zj11c05.s1 Soares_fetal_liver_spleen_1NFLS_S1 Homo sapiens cDNA clone IMAGE:449960 3' similar to contains MER17.t1 MER17 repetitive element ;, mRNA sequence.
241871_at	0.981622	0.586063	0.585058	0.775563	CAMK4	AL529104	Calcium/calmodulin-dependent protein kinase IV
241816_at	0.822433	0.909076	0.490303	0.836171	C14orf106	AW103300	Chromosome 14 open reading frame 106
241703_at	1.01094	0.767039	1.16996	1.56008	RPIB9	AI928037	Rap2-binding protein 9
243042_at	0.991149	0.864392	0.502079	0.662199	FAM73A	BE645144	Family with sequence similarity 73, member A
243198_at	1.18209	1.65279	1.1073	2.05969	TEX9	AA020920	Testis expressed 9
243209_at	1.02998	1.11558	1.27555	1.58515	KCNQ4	BF725804	Potassium voltage-gated channel, KQT-like subfamily, member 4
243166_at	0.796197	0.635607	0.338792	0.439851	SLC30A5	AA836340	Solute carrier family 30 (zinc transporter), member 5
243170_at	0.864689	1.03282	0.455574	0.87498	LOC339745	AW291545	Transcribed locus
242989_at	1.07883	1.01184	0.563695	0.786076		AA971931	Transcribed locus
242931_at	1.11303	1.36366	1.50955	1.71745		AI218358	qh21g07.x1 Soares_NFL_T_GBC_S1 Homo sapiens cDNA clone IMAGE:1845372 3', mRNA sequence.
243020_at	1.00731	0.915426	0.648344	1.00574	FAM13A1OS	R06738	Family with sequence similarity 13, member A1 opposite strand
243011_at	1.18387	1.30515	1.76795	1.38513	FAM55C	BF317081	Family with sequence similarity 55, member C
243037_at	1.14912	1.59242	0.788499	0.820819		AA830144	oc44e12.s1 NCI_CGAP_GCB1 Homo sapiens cDNA clone IMAGE:1352590 3' similar to contains Alu repetitive element;contains element L1 repetitive element ;, mRNA sequence.
243000_at	0.886694	0.74336	0.668463	0.596118	CDK6	AW194766	Cyclin-dependent kinase 6
243501_at	1.00173	0.98821	0.560271	0.803136	DCTN2	BF002823	Transcribed locus
243502_at	1.04988	1.48963	1.3726	1.10674		BF035598	601457529F1 NIH_MGC_66 Homo sapiens cDNA clone IMAGE:3861199 5', mRNA sequence.
243299_at	0.948245	0.883238	0.54603	0.782503	VRK2	AW167087	Transcribed locus
242577_at	0.96644	0.997142	0.682532	0.64803	LOC653071	BF109197	Transcribed locus
242669_at	0.784691	0.66319	0.353207	0.647793	UFM1	BF514975	Ubiquitin-fold modifier 1
242671_at	1.02313	0.757595	0.428069	0.527853	MID1	BF055144	7j75e02.x1 Soares_NSF_F8_9W_OT_PA_P_S1 Homo sapiens cDNA clone IMAGE:3392282 3', mRNA sequence.
242635_s_at	1.07638	1.38611	1.5568	1.39756	NAPE-PLD	AI857635	N-acyl-phosphatidylethanolamine-hydrolyzing phospholipase D
242629_at	1.11664	0.828732	0.728365	1.54653	RAB3B	BF056092	CDNA FLJ34848 fis, clone NT2NE2011684, weakly similar to H.sapiens mRNA for plakophilin 2a and b
242463_x_at	0.929782	1.12211	1.16594	1.64451	ZNF600	AI620827	Zinc finger protein 600
242476_at	0.761383	0.714304	0.419608	0.94407		AI436356	Transcribed locus
242442_x_at	1.06434	0.745888	0.555326	0.815543	RG9MTD2	AL515269	AL515269 Homo sapiens NEUROBLASTOMA Homo sapiens cDNA clone CL0BB016ZA10 3-PRIME, mRNA sequence.
242486_at	1.09909	1.4652	1.53523	1.41645	FIBP	BF516341	Transcribed locus
242827_x_at	1.31461	2.30817	1.82096	2.31387	GLMN	AA806368	Transcribed locus
242900_at	0.988849	0.784913	0.478022	0.782963	ALG10B	BF244214	Asparagine-linked glycosylation 10 homolog B (yeast, alpha-1,2-glucosyltransferase)
242894_at	0.897113	1.09305	0.589537	0.832924	Gcom1	AA620926	af96c10.s1 Soares_testis_NHT Homo sapiens cDNA clone IMAGE:1055634 3', mRNA sequence.
242844_at	1.07054	1.36869	1.62936	1.12954	PGGT1B	AA989220	Protein geranylgeranyltransferase type I, beta subunit
242711_x_at	0.990613	0.886754	0.591595	0.915231	FANCM	AI745662	Fanconi anemia, complementation group M
242794_at	0.990244	0.991854	1.27516	1.39779	MAML3	AI569476	Mastermind-like 3 (Drosophila)
242787_at	0.897998	0.612343	0.895672	0.941963	INCENP	AI924134	Inner centromere protein antigens 135/155kDa
242759_at	1.22168	1.42474	1.54561	1.35737		AI821726	Transcribed locus
242775_at	1.27447	1.43423	1.08738	1.16079	LTB4DH	BF477980	Transcribed locus
242778_at	1.14767	1.26421	1.55964	1.44496	LPXN	AA250935	zs07d07.r1 NCI_CGAP_GCB1 Homo sapiens cDNA clone IMAGE:684493 5' similar to contains Alu repetitive element;contains element PTR5 repetitive element ;, mRNA sequence.
230099_at	1.03559	1.31421	1.35081	1.51181	PVRL1	AI139993	Transcribed locus
230100_x_at	1.0403	1.20273	1.48104	1.58553	PAK1	AU147145	P21/Cdc42/Rac1-activated kinase 1 (STE20 homolog, yeast)
230102_at	1.04657	1.27524	1.44834	1.58441	ETV5	AW206458	Ets variant gene 5 (ets-related molecule)
230029_x_at	0.978769	0.849298	0.64492	0.761677	ZNF650	AI708334	Zinc finger protein 650
230003_at	0.90946	0.776717	0.469581	0.669845		AW779917	Transcribed locus
230005_at	0.865817	0.895124	0.600507	0.646207	DKFZp313A2432	AI742358	Hypothetical protein DKFZp313A2432
230063_at	0.901176	1.22876	1.26516	1.49774	ZNF264	BF063192	zinc finger protein 264
230076_at	0.888826	1.27879	1.42666	1.66797	FLJ10156	BF063164	Transcribed locus
230333_at	0.976484	1.15434	1.31534	1.66337	SAT	BE326919	Transcribed locus
230281_at	1.00191	0.797143	0.54754	0.694903	C16orf46	AI921002	Chromosome 16 open reading frame 46
230369_at	0.991954	1.1644	1.50611	1.37229	GPR161	AI743151	G protein-coupled receptor 161
230380_at	0.996246	0.844322	0.547134	0.681386	THAP2	AW235671	THAP domain containing, apoptosis associated protein 2
230387_at	0.825277	0.686354	0.274946	0.58935	ATP2C1	AL038450	Transcribed locus
230356_at	1.11161	1.13614	1.59456	1.69162		AW014743	Transcribed locus
230055_at	1.00988	0.894883	0.901848	0.60588	C6orf148	AL037414	Chromosome 6 open reading frame 148
230194_at	0.871282	0.793681	0.635437	0.589237	LRPPRC	AI341076	Transcribed locus
230185_at	1.05259	0.835935	0.468015	0.750627	THAP9	AW301218	THAP domain containing 9
229711_s_at	1.1824	1.40319	1.3251	1.36789	MGC5370	AA902480	Hypothetical protein MGC5370
229785_at	0.848368	0.902603	0.595255	1.04737	KRIT1	BF939071	KRIT1, ankyrin repeat containing
229751_s_at	1.04615	1.05782	0.533598	0.80895	PUS7L	AW665832	Pseudouridylate synthase 7 homolog (S. cerevisiae)-like
229765_at	0.958385	0.873527	0.53704	0.876064		AW511239	Transcribed locus
229766_at	1.06804	1.05412	1.55202	1.36371	ZNF445	AW264273	Zinc finger protein 445
229622_at	1.12076	1.23219	1.60314	1.79868	FAM132B	H16258	Family with sequence similarity 132, member B
229590_at	1.089	1.22754	1.75494	1.29905	RPL13	AI369389	Ribosomal protein L13
229676_at	1.36236	1.66039	1.79651	1.72281	PAPD1	AA400998	PAP associated domain containing 1
229656_s_at	1.05997	1.14928	1.2283	1.61708	FLJ42562	AA236463	Similar to echinoderm microtubule associated protein like 5
229970_at	0.982367	1.03211	0.611711	0.716512	KBTBD7	BE672291	Transcribed locus
229828_at	0.9681	0.726126	0.633608	0.831851	HRPT2	AL044007	Transcribed locus
229810_at	1.06011	1.07376	1.34365	1.5939		AI796536	Transcribed locus
231055_at	1.1459	1.17339	1.19046	1.6118		BF432941	7n28g07.x1 NCI_CGAP_Lu24 Homo sapiens cDNA clone IMAGE:3566028 3', mRNA sequence.
231045_x_at	1.12342	1.17657	1.4758	1.43937	C11orf31	H29876	Chromosome 11 open reading frame 31
231090_s_at	0.933823	0.859075	0.46296	0.967022	ARID2	AI692432	AT rich interactive domain 2 (ARID, RFX-like)
230894_s_at	0.924283	1.08487	1.18985	1.78059	MSI2	BE672557	Transcribed locus
231011_at	0.963576	0.603692	0.772342	0.660793	LARP2	AI339785	La ribonucleoprotein domain family, member 2
231579_s_at	0.990332	1.12798	1.4112	1.53361	TIMP2	BE968786	TIMP metallopeptidase inhibitor 2
231416_at	0.976578	1.04228	1.68331	1.49838	HUM2DD	NM_014475	dihydrodiol dehydrogenase (dimeric)
231269_at	0.993569	0.903919	0.57013	0.959136	ASCC3	AU153330	Activating signal cointegrator 1 complex subunit 3
231274_s_at	1.08123	1.59897	1.56493	1.50416	SLC25A37	R92925	Solute carrier family 25, member 37
230556_at	0.927625	0.7517	0.711668	0.627458	IMMP1L	AA977197	IMP1 inner mitochondrial membrane peptidase-like (S. cerevisiae)
230581_at	1.15776	1.24937	1.53008	1.0841		AI652919	CDNA FLJ32217 fis, clone PLACE6003771
230426_at	1.1001	1.46146	1.06524	1.19121	DLD	BF212846	Dihydrolipoamide dehydrogenase
230416_at	1.01193	0.977296	0.636264	0.945691	SLC18A2	AI709335	Transcribed locus
230389_at	1.05359	1.33101	1.51725	1.56807	FNBP1	BE046511	Formin binding protein 1
230464_at	1.09595	1.40886	2.03829	1.33148	EDG8	AI814092	Endothelial differentiation, sphingolipid G-protein-coupled receptor, 8
230811_at	1.05219	1.27539	1.68309	1.49745	C16orf55	AI655320	Chromosome 16 open reading frame 55
230820_at	1.19057	1.14956	1.24907	1.50374	SMURF2	BF111169	SMAD specific E3 ubiquitin protein ligase 2
230653_at	0.732976	0.776726	0.476095	0.808136	HMGA1	AI469960	Transcribed locus
230676_s_at	0.93677	0.718077	0.919432	0.62441	TMEM19	AW663887	Transmembrane protein 19
230735_at	0.932357	0.898713	0.594436	0.868096	ALB	AI653318	Transcribed locus
228569_at	0.889658	0.846085	0.773601	0.641969	PAPOLA	AV683473	Poly(A) polymerase alpha
228582_x_at	1.05286	1.38169	0.987103	1.89714	MALAT1	AI475544	Metastasis associated lung adenocarcinoma transcript 1 (non-coding RNA)
228573_at	1.00746	1.08695	1.2435	1.47832	ANTXR2	BE673665	Full-length cDNA clone CS0DD001YA12 of Neuroblastoma Cot 50-normalized of Homo sapiens (human)
228628_at	0.93461	0.757582	0.54589	0.94789	LOC653464	AI478268	Similar to SLIT-ROBO Rho GTPase-activating protein 2 (srGAP2) (Formin-binding protein 2)
228633_s_at	0.880388	0.575846	0.763496	0.843989	CNTROB	AI668799	Centrobin, centrosomal BRCA2 interacting protein
228640_at	0.902001	0.663963	0.462723	0.620854	PCDH7	BE644809	CDNA clone IMAGE:4800096
228647_at	0.856603	0.623212	0.681997	0.570339	C4orf30	AI675844	Homo sapiens, clone IMAGE:3621928
228618_at	0.940466	1.23695	1.75127	1.43966	PEAR1	AL040178	Platelet endothelial aggregation receptor 1
228505_s_at	1.04762	1.33743	1.63256	1.28557	TMEM170	N49836	Transmembrane protein 170
228520_s_at	1.12141	1.2437	1.62711	1.76867	APLP2	AA022510	Amyloid beta (A4) precursor-like protein 2
228487_s_at	1.06751	1.14348	1.42813	1.3655	RREB1	BF591556	Ras responsive element binding protein 1
228485_s_at	1.10575	1.58253	1.3647	1.59577	SLC44A1	AW165999	Solute carrier family 44, member 1
228490_at	0.928579	0.619125	0.979402	1.01588	ABHD2	AW292816	Abhydrolase domain containing 2
228751_at	0.857511	0.767177	0.449797	0.7619	CLK4	AW975057	CDC-like kinase 4
228693_at	0.843126	0.948324	0.619296	0.904867	CCDC50	AI681307	Coiled-coil domain containing 50
228655_at	1.057	0.964205	0.477911	0.692364		BE466077	Unknown mRNA sequence
228716_at	1.28129	0.991927	0.979385	1.51787	THRB	BG494007	Thyroid hormone receptor, beta (erythroblastic leukemia viral (v-erb-a) oncogene homolog 2, avian)
228251_at	1.29483	1.33563	1.94892	1.55376	UBXD1	BE467577	UBX domain containing 1
228245_s_at	0.940474	1.19002	1.39621	1.61376	OVOS2	AW594320	Ovostatin 2
228242_at	1.02814	0.723673	0.495562	0.841245		BF055201	Transcribed locus
228292_at	1.06473	1.12884	1.46448	1.15711	GBA2	AI291989	Transcribed locus, moderately similar to XP_001167923.1 bile acid beta-glucosidase isoform 4 [Pan troglodytes]
228304_at	0.9242	0.536713	0.86373	0.963863		BE674118	Transcribed locus
228153_at	1.02316	1.28661	1.5544	1.81116	IBRDC2	AI953847	IBR domain containing 2
228155_at	1.00539	1.07997	1.67522	1.83563	C10orf58	BF512388	Chromosome 10 open reading frame 58
228286_at	0.98106	0.617666	0.471917	0.713774	FLJ40869; DKFZp781F0986	AK025489	hypothetical protein FLJ40869
228418_at	0.954074	0.906482	0.609213	1.13511	EXOC5	BF509391	Exocyst complex component 5
228435_at	1.08648	1.67986	1.2686	1.43666	FEM1A	AL530854	Fem-1 homolog a (C. elegans)
228395_at	0.899747	0.722504	0.883785	0.654678	GNL3	AI762431	Guanine nucleotide binding protein-like 3 (nucleolar)
228403_at	1.16723	1.50602	1.46436	1.60925	C9orf165	AL541276	Chromosome 9 open reading frame 165
228400_at	1.20948	1.10107	1.5367	1.45856	SHROOM3	AW025141	Shroom family member 3
228446_at	0.87515	0.77992	0.57408	0.643015	KIAA2026	BF062203	KIAA2026
228454_at	0.972703	0.95789	0.588507	1.0106	LCOR	AW663968	Ligand dependent nuclear receptor corepressor
228332_s_at	0.999561	1.19278	1.52777	1.39509	C11orf31	AA526939	Chromosome 11 open reading frame 31
228341_at	0.940525	0.788674	0.59905	0.776362	FLJ31265	AI809108	CDNA FLJ34034 fis, clone FCBBF2004671
228315_at	0.959234	1.21902	1.20954	1.61691	SELT	AI632728	CDNA clone IMAGE:5261213
228324_at	0.93449	0.908389	0.710757	0.603815	C9orf41	BF031819	Chromosome 9 open reading frame 41
228323_at	0.972206	0.837754	0.572159	0.891955	CASC5	BF248364	Cancer susceptibility candidate 5
228381_at	0.961852	0.711522	0.622023	0.682471	ATF7IP2	AV716964	Activating transcription factor 7 interacting protein 2
228328_at	1.09395	0.896117	0.593327	1.18809	KLHL28	AI982758	Kelch-like 28 (Drosophila)
228361_at	1.05396	1.14736	1.49923	1.2121	E2F2	AL561296	E2F transcription factor 2
229317_at	0.914945	0.919002	0.522059	0.69532	KPNA5	BG231980	Transcribed locus
229395_at	0.918539	0.841849	0.871817	0.607228	STX4	BF939292	Syntaxin 4
229223_at	1.01696	1.49113	1.5874	1.49289	CCND3	AI038402	Transcribed locus
229254_at	1.03044	0.913448	1.48254	1.42748	MFSD4	BE550027	Major facilitator superfamily domain containing 4
229533_x_at	1.03562	1.10802	0.463341	1.10045	ZNF680	AI963028	Zinc finger protein 680
229515_at	1.00315	0.840573	0.761257	0.642563	PAWR	AA632147	PRKC, apoptosis, WT1, regulator
229417_at	0.96546	1.17384	1.0076	1.51162	STAU2	W46994	Transcribed locus
229414_at	1.04779	1.15826	1.38282	1.66724	PITPNC1	AI676095	Phosphatidylinositol transfer protein, cytoplasmic 1
229483_at	1.17782	1.36642	1.16727	1.34563	UBE2H	AA760738	CDNA FLJ42331 fis, clone TSTOM2000588
229504_at	0.995549	0.974281	0.599113	0.779722	RAB23	AI810826	Transcribed locus
229450_at	1.59211	1.79284	1.77574	2.01472	IFIT3	AI075407	Interferon-induced protein with tetratricopeptide repeats 3
228937_at	1.0166	0.767363	0.542633	1.19414	C13orf31	AI659800	Chromosome 13 open reading frame 31
228988_at	0.862007	0.838934	0.482444	0.716675	ZNF711	AU157017	Zinc finger protein 711
228941_at	0.837611	0.708252	0.284495	0.503287	ALG10B	AW295395	Asparagine-linked glycosylation 10 homolog B (yeast, alpha-1,2-glucosyltransferase)
228975_at	1.42361	1.94532	2.25251	1.79804	SP6	AI817264	Sp6 transcription factor
228859_at	0.905431	0.999275	0.542753	0.989908	LOC91431	BF056790	Prematurely terminated mRNA decay factor-like
228824_s_at	1.01097	1.25991	1.47587	1.43065	LTB4DH	BE566894	Leukotriene B4 12-hydroxydehydrogenase
228834_at	1.07831	1.49771	1.61051	1.81139	TOB1	BF240286	Transducer of ERBB2, 1
228885_at	0.779184	0.798281	0.867622	1.42451	RPL24	AI862120	Ribosomal protein L24
229123_at	1.14001	1.47467	1.441	1.51988	ZNF225	AI652703	Zinc finger protein 225
229128_s_at	0.871143	0.848916	0.594	1.10713	ANP32E	AI697657	Acidic (leucine-rich) nuclear phosphoprotein 32 family, member E
229027_at	0.91801	0.643569	0.524806	0.58939	PPM1A	AI241945	Transcribed locus
229007_at	1.18309	1.89756	1.48394	1.56369	LOC283788	N50864	yy92b05.s1 Soares_multiple_sclerosis_2NbHMSP Homo sapiens cDNA clone IMAGE:280977 3', mRNA sequence.
229089_at	0.961153	0.773146	0.679769	0.580759	ZNF509	BF061904	Zinc finger protein 509
229053_at	0.968834	1.07806	1.36565	1.5901	SYT17	AI582818	Synaptotagmin XVII
229066_at	0.967897	0.935745	0.513986	0.868239	UBE4A	AA694209	Transcribed locus
235006_at	0.881164	0.547182	0.812399	0.594111	MGC13017	AL571598	AL571598 Homo sapiens PLACENTA COT 25-NORMALIZED Homo sapiens cDNA clone CS0DI024YM24 3-PRIME, mRNA sequence.
235000_at	0.988536	1.26594	0.746958	1.52561	JMJD1C	T86629	CDNA FLJ30652 fis, clone DFNES2000011
234976_x_at	1.01591	1.2556	1.48486	1.45999	SLC4A5	BG324504	Solute carrier family 4, sodium bicarbonate cotransporter, member 5
234982_at	1.03926	0.966644	0.614114	0.954363	ZNF650	BF577193	Zinc finger protein 650
234986_at	1.00695	0.846595	0.628286	0.570666	GCLM	AA630626	Full-length cDNA clone CS0CAP007YJ17 of Thymus of Homo sapiens (human)
234988_at	0.983895	1.06381	0.536293	0.684471	VCPIP1	AW629515	Valosin containing protein (p97)/p47 complex interacting protein 1
234984_at	1.02437	0.785973	0.589125	0.983958	NEDD1	AA236927	Neural precursor cell expressed, developmentally down-regulated 1
235023_at	0.760093	0.630784	0.363235	0.716982	VPS13C	AA828371	Vacuolar protein sorting 13 homolog C (S. cerevisiae)
234775_at	1.02392	0.813954	0.554941	0.669519		AF137396
234728_s_at	0.941776	1.04238	1.38758	0.937057	DHX35	AL023803
234735_s_at	0.886884	0.631585	0.929941	0.694454	USP16; USP23; MGC3394	AF217979	ubiquitin specific peptidase 21
234975_at	1.05621	1.14065	1.49794	1.5829	GSPT1	BE544748	CDNA FLJ39067 fis, clone NT2RP7014910
234932_s_at	0.898914	1.33711	1.61432	1.6011	CDCP1	AK026028	Homo sapiens cDNA: FLJ22375 fis, clone HRC06785.
234923_at	0.896997	0.834796	0.490963	0.786245	GRIPE; TULIP1; KIAA0884; DKFZp566D133; DKFZp667F074	AK022988	GTPase activating Rap/RanGAP domain-like 1
235146_at	0.884818	0.964296	1.3546	1.52004	KIAA1145	N51717	Transcribed locus
235167_at	1.11604	1.88639	1.21664	1.65942		BE972419	601652242F1 NIH_MGC_82 Homo sapiens cDNA clone IMAGE:3935554 5', mRNA sequence.
235162_at	0.95129	0.797328	0.770361	0.57797	MDM4	AW269813	Full-length cDNA clone CS0CAP006YG04 of Thymus of Homo sapiens (human)
235125_x_at	0.963154	0.793132	0.483111	0.628753		AI078279	Transcribed locus
235196_at	0.952093	0.836861	0.622873	0.817657	HRPT2	AA447464	Transcribed locus
235203_at	0.968561	0.920115	0.914701	0.514802	SCOTIN	AA398756	Homo sapiens, clone IMAGE:3866695, mRNA
235207_at	0.969423	0.607102	0.510473	0.474625		AV764634	Transcribed locus
235170_at	0.742588	0.732994	0.457701	0.775942	ZNF92	T52999	Zinc finger protein 92
235189_at	1.07457	1.3752	1.2005	1.25327	NARG2	BE780502	NMDA receptor regulated 2
235178_x_at	1.0322	0.55091	0.518589	0.64904	LOC157570	AL120674	DKFZp762A0410_r1 762 (synonym: hmel2) Homo sapiens cDNA clone DKFZp762A0410 5', mRNA sequence.
235065_at	1.10846	1.56394	1.07988	1.47978		AI546970	Full length insert cDNA clone ZE05E03
235078_at	0.968549	0.806172	0.577448	1.22246	HFE	AI393725	Transcribed locus
235045_at	0.875246	0.625549	0.652234	0.747656	RBM7	AI493853	RNA binding motif protein 7
235046_at	0.958869	0.808415	0.624464	1.01877		AA456099	Transcribed locus
235060_at	1.01945	1.43712	1.3649	1.72875	DKFZp547E087	AL047052	Hypothetical gene LOC283846
235113_at	0.861523	0.764809	0.767749	0.65238	LRR-1; 4-1BBLRR; MGC20689	AA742244	peptidylprolyl isomerase (cyclophilin)-like 5
235062_at	0.928007	0.586985	0.937119	0.839133	PIH1D2	AI744716	PIH1 domain containing 2
233898_s_at	0.908587	0.906953	0.611903	0.780997	FGFR1OP2	AL117545	FGFR1 oncogene partner 2
233982_x_at	0.999823	1.36299	1.57817	1.34447	DUSP24; MK-STYX	AF188204	serine/threonine/tyrosine interacting-like 1
233924_s_at	1.01324	1.30092	1.56361	1.47554	EXOC6A; SEC15L; Sec15p; FLJ1125; SEC15L1; FLJ11251; MGC33397; DKFZp761I2124	AK002113	exocyst complex component 6
233849_s_at	1.07769	0.82857	0.478996	0.780835	ARHGAP5	AK023014	Rho GTPase activating protein 5
233869_x_at	1.19461	0.882125	0.71236	0.64077	DKFZP586B0319	AL050097	DKFZP586B0319 protein
233827_s_at	0.943627	1.26997	1.44747	1.36207	FACT; CDC68; FACTP140; FLJ10857; FLJ14010; FLJ34357; SPT16/CDC68	AK024072	suppressor of Ty 16 homolog (S. cerevisiae)
234513_at	1.10753	1.10605	1.67916	1.72172	CIG30; CIG-30; MGC21435	AF292387	elongation of very long chain fatty acids (FEN1/Elo2, SUR4/Elo3, yeast)-like 3
234405_s_at	1.02584	0.833151	0.579775	0.785995	PHAX; FLJ13193	AK024065	RNA U, small nuclear RNA export adaptor (phosphorylation regulated)
234594_at	1.04672	1.50332	1.67634	1.64623	C14orf85	AK024887	chromosome 14 open reading frame 85
234312_s_at	0.96236	1.02962	1.25469	1.63246	ACS; ACSA; ACAS2; AceCS; dJ1161H23.1; DKFZp762G026	AK000162	acyl-CoA synthetase short-chain family member 2
234339_s_at	1.05266	1.1728	1.68685	1.53524	PICT1; PICT-1	AF296124	glioma tumor suppressor candidate region gene 2
234304_s_at	0.957277	0.665863	0.545445	0.673637	SLRN; RanBP11	AL162083	importin 11
234299_s_at	1.03164	1.59723	1.27	1.42556	KIAA1565	AK027054	ninein (GSK3B interacting protein)
235688_s_at	1.04657	1.53395	1.6554	1.32793	TRAF4	AI992283	TNF receptor-associated factor 4
235733_at	1.07526	1.21908	1.30784	1.49599	AFF4	AW043921	Transcribed locus
235585_at	0.934514	0.764195	0.633922	0.868467		AA026857	Transcribed locus
235559_at	1.07874	1.43335	1.55513	1.78666	FLJ22374	AI539542	Hypothetical protein FLJ22374
235566_at	1.01733	1.07371	0.501876	1.35246	TMF1	AW591660	TATA element modulatory factor 1
235581_at	0.887016	0.713827	0.566828	0.671888		AA478537	Transcribed locus
235612_at	0.943996	1.03101	0.825975	0.632508		BE551047	Transcribed locus
235911_at	1.0215	1.09605	1.63746	1.54581	LOC440995	AI885815	Hypothetical gene supported by BC034933; BC068085
235890_at	1.0735	0.915146	0.590089	0.970749		AI669022	Transcribed locus
235952_at	0.991167	0.995221	0.420043	0.721318	CYP20A1	AA521504	Transcribed locus
235954_at	0.993166	0.708606	0.576385	0.796555	MMP1	AA972597	op78f01.s1 Soares_NFL_T_GBC_S1 Homo sapiens cDNA clone IMAGE:1582969 3' similar to contains Alu repetitive element;, mRNA sequence.
235956_at	0.980797	0.846438	0.619316	0.836292	KIAA1377	AI797063	KIAA1377
235959_at	0.983426	0.769963	0.509459	1.01646	ARID4B	AI424238	AT rich interactive domain 4B (RBP1-like)
235926_at	1.18133	1.71864	1.44058	1.70648	ANAPC5	AI312527	Transcribed locus
235791_x_at	1.02343	0.880208	0.479552	0.7898	CHD1	AU155298	Chromodomain helicase DNA binding protein 1
235792_x_at	0.758916	0.753196	0.481357	0.61687	PIK3C2A	AU154663	Phosphoinositide-3-kinase, class 2, alpha polypeptide
235763_at	1.16868	1.44609	1.12696	2.15766	SLC44A5	AA001450	Solute carrier family 44, member 5
235834_at	1.23909	1.69586	1.30553	1.56522	CALD1	BF063186	Caldesmon 1
235837_at	1.01262	1.22865	1.57113	1.27818		AA813998	Transcribed locus
235320_at	0.719652	0.682122	0.401403	0.724461	ARL6	AL138043	DKFZp761M1815_r1 761 (synonym: hamy2) Homo sapiens cDNA clone DKFZp761M1815 5', mRNA sequence.
235300_x_at	1.10019	1.06622	0.548606	0.59188	RCHY1	AW236209	Ring finger and CHY zinc finger domain containing 1
235361_at	1.18608	1.19904	1.48116	1.07227	STAMBP	AW842975	Transcribed locus
235349_at	0.978282	0.898509	0.894494	0.646563	FAM82A	AI261321	Family with sequence similarity 82, member A
235369_at	1.06334	1.18508	1.00845	1.50517	C14orf28	BF435952	Chromosome 14 open reading frame 28
235338_s_at	0.770488	0.702324	0.721971	0.614471	SETDB2	W65369	SET domain, bifurcated 2
235208_at	1.11786	1.01294	0.659111	0.753437	CCDC112	AW157712	Coiled-coil domain containing 112
235275_at	1.00929	1.26401	1.4738	1.47011	BMP8B	AA610122	Bone morphogenetic protein 8b (osteogenic protein 2)
235273_at	1.00262	0.745124	0.547274	0.702922	DYX1C1	AI674107	Dyslexia susceptibility 1 candidate 1
235289_at	0.985237	0.948304	0.485711	0.760347	EIF5A2	AV747725	AV747725 NPC Homo sapiens cDNA clone NPCBSF03 5', mRNA sequence.
235259_at	0.926705	0.88846	0.790975	0.647928	C4orf28	AA398590	Chromosome 4 open reading frame 28
235508_at	1.0879	1.29266	1.22924	1.52565	PML	AW291023	Promyelocytic leukemia
235505_s_at	1.12047	1.20722	1.51744	1.08203		AA724665	MRNA full length insert cDNA clone EUROIMAGE 2362292
235511_at	1.22179	1.41762	1.11401	1.62484	MGC10871	BE144058	CDNA FLJ36727 fis, clone UTERU2012286
235475_at	0.920123	0.86136	0.537441	0.683877	SERP1	AI580135	Stress-associated endoplasmic reticulum protein 1
235478_at	0.848154	0.944567	0.532437	0.86024	DCLRE1C	T79927	yd85a08.s1 Soares fetal liver spleen 1NFLS Homo sapiens cDNA clone IMAGE:114998 3', mRNA sequence.
235535_x_at	0.879464	0.799868	0.620285	0.826653	FRG1	AI369073	qw29g11.x1 NCI_CGAP_Ut4 Homo sapiens cDNA clone IMAGE:1992548 3', mRNA sequence.
235552_at	1.0524	0.896316	0.644916	0.782528	KIAA1627	AA354181	KIAA1627 protein
235484_at	0.935638	0.939005	0.642506	0.859556	PTAR1	BE892889	601435734F1 NIH_MGC_72 Homo sapiens cDNA clone IMAGE:3920600 5', mRNA sequence.
235513_at	1.18143	1.62959	1.30412	1.72315	HBA2	AW131450	Transcribed locus
235520_at	0.932493	0.775189	0.647166	0.759824	SUHW3	AA805654	Suppressor of hairy wing homolog 3 (Drosophila)
235414_at	0.832402	1.21824	1.54813	1.23631	ZNF383	BF432571	Zinc finger protein 383
235381_at	0.98001	0.836059	0.525711	1.06902	HBXAP	BF033855	Homo sapiens, clone IMAGE:3457110, mRNA
235429_at	0.89866	0.850274	0.495549	0.607779	EIF3S6	AW965494	Transcribed locus
235434_at	1.04285	1.24603	1.4727	1.20723		AI984541	CDNA FLJ30141 fis, clone BRACE2000148
232183_at	1.16698	1.21978	1.15347	1.5141	SERAC1	AA128978	Serine active site containing 1
232156_at	0.782033	0.703784	0.457413	0.730199	CMYA5	AK024921	CDNA: FLJ21268 fis, clone COL01718
232167_at	1.12098	1.42689	1.29973	1.43803	SLC2A11	BE675356	7f07e09.x1 NCI_CGAP_CLL1 Homo sapiens cDNA clone IMAGE:3293992 3' similar to contains Alu repetitive element;contains element MER24 repetitive element ;, mRNA sequence.
232166_at	0.92735	0.970375	0.605174	0.856076	KIAA1377	AL045516	KIAA1377
232064_at	1.13473	0.932135	0.514632	0.882919		AK021888	CDNA FLJ35001 fis, clone OCBBF2011887
232071_at	0.807474	0.927548	0.312917	0.648394	MRPL19	BF670827	Mitochondrial ribosomal protein L19
232151_at	0.980656	1.23678	1.31605	1.56467		AL359055	MRNA full length insert cDNA clone EUROIMAGE 2344436
232370_at	1.00005	1.2384	1.29042	1.58689	LOC254057	AI635756	wa07a12.x1 NCI_CGAP_Kid11 Homo sapiens cDNA clone IMAGE:2297374 3', mRNA sequence.
232369_at	1.45584	1.24516	0.87661	1.81751	MBNL2	AF339768	Clone IMAGE:119716, mRNA sequence
232493_at	0.908633	0.633529	0.682757	0.606798	AKAP13	AK022015	CDNA FLJ11953 fis, clone HEMBB1000883
232297_at	0.936405	0.790076	0.494056	0.808024	KLHL5	AL049385	CDNA FLJ11313 fis, clone PLACE1010106, highly similar to Homo sapiens mRNA; cDNA DKFZp586M1418
232136_s_at	1.24595	1.30615	1.98078	1.93001	Orf4; C7orf8; CORTBP2; FLJ34229; KIAA1758; MGC104579	AB051545	cortactin binding protein 2
232338_at	0.814136	0.79322	0.615387	0.834367	ZNF431	AU144815	Zinc finger protein 431
231840_x_at	1.13115	0.964901	0.523753	0.661492	C5orf31; FLJ20796; MGC24679	AK000803	Lyrm7 homolog (mouse)
231864_at	0.991778	0.839294	0.490122	0.577256	KOX2; KOX5; KOX31; NF11A; ZNF11; ZNF33; ZZAPK; ZNF11A; FLJ23404; KIAA0065	D31763	zinc finger protein 33A
231874_at	0.956009	0.670275	0.573361	0.68303	FAM126B	AU155930	Family with sequence similarity 126, member B
231872_at	0.824038	0.818261	0.414438	0.741028	KIAA1764	T52285	yb22g08.r1 Stratagene fetal spleen (#937205) Homo sapiens cDNA clone IMAGE:71966 5', mRNA sequence.
231873_at	1.02899	1.00998	0.574613	1.14692	BMPR2	AL046696	Bone morphogenetic protein receptor, type II (serine/threonine kinase)
231850_x_at	0.916213	0.697659	0.701484	0.562969	PS1TP3	AB051499	KIAA1712
231855_at	0.918131	0.610001	0.382865	0.59826	FLJ12850; MGC163436	AB040957	KIAA1524
231857_s_at	1.09194	1.31646	1.60988	1.58256	FLJ21839	AK023398	ATP/GTP binding protein-like 5
231807_at	1.06745	1.05683	1.28495	1.48877	SKT; MGC31990; DKFZP761L0424; RP11-324E23.1	AL157473	KIAA1217
232001_at	1.28186	1.55436	1.41015	0.905071	LOC439949	AW193600	Hypothetical gene supported by AY007155
231974_at	1.04131	0.756332	0.622168	0.495549	MLL2	AI742164	Myeloid/lymphoid or mixed-lineage leukemia 2
231973_s_at	1.02083	1.02018	1.41317	1.32242	ANAPC1	AK001223	Homo sapiens cDNA FLJ10361 fis, clone NT2RM2001256, highly similar to PROTEIN TSG24.
232060_at	1.2548	1.05502	1.10009	1.66266	ALB	AK000776	Full-length cDNA clone CS0DD009YB17 of Neuroblastoma Cot 50-normalized of Homo sapiens (human)
232014_at	1.21307	1.5193	1.46217	1.52983	ZNF30	AI700188	Zinc finger protein 30
231880_at	1.09069	1.51053	1.40935	1.21692	FAM40B	AB032996	family with sequence similarity 40, member B
231887_s_at	1.00012	1.22713	1.55007	1.22616	PALD	AB033100	KIAA1274
231895_at	0.874671	0.862774	0.484156	0.788406	SASS6	AA501453	Spindle assembly 6 homolog (C. elegans)
231950_at	1.06199	0.785692	0.651616	1.13868	ZNF658	AW874634	Zinc finger protein 658
231960_at	0.860939	0.687992	0.455084	0.744155	N143; WDR9; FLJ43918; C21orf107	AA807344	bromodomain and WD repeat domain containing 1
231928_at	1.04071	1.14443	1.19013	1.47829	HES2	AK023754	hairy and enhancer of split 2 (Drosophila)
231899_at	0.886016	0.81425	0.594895	0.697118	KIAA1726	AB051513	zinc finger CCCH-type containing 12C
231944_at	1.13012	1.68194	1.55012	1.97153	GPR137B	AL045717	G protein-coupled receptor 137B
233364_s_at	1.06498	1.00472	0.444206	1.13819	ADAMTS8	AK021804	CDNA FLJ38472 fis, clone FEBRA2022148
233198_at	1.07309	1.54959	1.67218	1.99016	LOC92497	AL359652	hypothetical protein LOC92497
233167_at	0.998258	1.15102	1.18852	1.66403	SELO; MGC131879	BC001099	selenoprotein O
233182_x_at	0.8892	0.914581	0.734257	0.590066	ATXN3	AU146105	Ataxin 3
233554_at	1.12497	1.51071	1.07827	1.35477	PHGDHL1	AF339764	Clone IMAGE:108721, mRNA sequence
233543_s_at	0.923908	1.08817	1.14752	1.57137	ABRA1; FLJ11520; FLJ12642; FLJ13614	AK021582	coiled-coil domain containing 98
233568_x_at	1.06671	1.23675	1.61656	1.28688	FLJ10998; RP11-316M21.3	AK023984	CWF19-like 1, cell cycle control (S. pombe)
233419_at	0.950625	1.0413	0.571903	0.399737		AK021913	CDNA FLJ11851 fis, clone HEMBA1006744
233539_at	0.938973	1.53171	1.41697	1.32689	NAPE-PLD	AK000801	N-acyl-phosphatidylethanolamine-hydrolyzing phospholipase D
232681_at	0.9076	0.807764	0.546564	0.647084	PSIP1	AI252087	PC4 and SFRS1 interacting protein 1
232744_x_at	0.988711	1.39569	1.08415	1.63806		BG485129	602503750F1 NIH_MGC_77 Homo sapiens cDNA clone IMAGE:4617157 5', mRNA sequence.
232684_at	1.07944	1.07236	1.50738	0.974238	LOC253264	AK023445	hypothetical protein LOC253264
232546_at	1.06396	1.41641	1.60048	1.10996	WDR8	AL136528
232559_at	0.900031	1.67607	0.868135	1.0189		AU145463	Transcribed locus
232515_at	1.2287	1.32475	1.88006	1.55281	ASB3	AU144567	Ankyrin repeat and SOCS box-containing 3
232516_x_at	0.975586	0.803356	0.774803	0.610348	DAP3	AU150385	AU150385 NT2RP2 Homo sapiens cDNA clone NT2RP2002643 3', mRNA sequence.
232591_s_at	1.12228	1.24329	1.35894	1.49253	CDC50A; C6orf67; FLJ10856	AK022883	transmembrane protein 30A
232563_at	1.01595	0.896362	0.844592	1.40606	ZNF684	AW275016	Zinc finger protein 684
232963_at	0.787984	1.10355	0.472467	0.854755	RFWD2	BF725688	Transcribed locus
232931_at	0.985423	1.38298	1.5462	1.32397	U5-200KD	AK021583	Homo sapiens cDNA FLJ11521 fis, clone HEMBA1002486.
232816_s_at	1.07403	1.23978	1.57699	1.06227	DDX11	AW571709	DEAD/H (Asp-Glu-Ala-Asp/His) box polypeptide 11 (CHL1-like helicase homolog, S. cerevisiae)
232902_s_at	1.10759	1.2184	1.65602	1.25072	RARS2	BG165118	Arginyl-tRNA synthetase 2, mitochondrial (putative)
232860_x_at	1.03443	0.637549	0.980008	0.85243	FLJ11016; FLJ13670; bB383K5.1; RP13-383K5.1	AK023732	RNA binding motif protein 41
232873_at	1.10484	1.32028	1.56224	0.998721	KOX2; KOX5; KOX31; NF11A; ZNF11; ZNF33; ZZAPK; ZNF11A; FLJ23404; KIAA0065	AK027057	zinc finger protein 33A
202789_at	1.0745	1.13591	1.52572	1.32101	PLCG1	AL022394
202785_at	1.20427	1.46039	1.60034	1.36737	B14.5a	NM_005001	NADH dehydrogenase (ubiquinone) 1 alpha subcomplex, 7, 14.5kDa
202793_at	1.07157	1.024	1.47698	0.994965	C3F; OACT5; nessy	NM_005768	membrane bound O-acyltransferase domain containing 5
202740_at	1.04716	1.09506	1.47394	1.51957	ACY1D; ACYLASE	NM_000666	aminoacylase 1
202742_s_at	0.942308	0.757938	0.555877	0.754532	PKACB; MGC9320; MGC41879; DKFZp781I2452	NM_002731	protein kinase, cAMP-dependent, catalytic, beta
202729_s_at	1.12754	1.19144	1.38872	1.5851	MGC163161	NM_000627	latent transforming growth factor beta binding protein 1
202731_at	0.928935	1.22643	1.58845	1.92715	H731; MGC33046; MGC33047	NM_014456	programmed cell death 4 (neoplastic transformation inhibitor)
202872_at	0.860372	0.63176	0.601057	0.663829	ATP6V1C1	AW024925	ATPase, H+ transporting, lysosomal 42kDa, V1 subunit C1
202873_at	0.968609	1.1589	1.39806	1.09698	ATP6V1C1	BF034973	ATPase, H+ transporting, lysosomal 42kDa, V1 subunit C1
202889_x_at	1.09158	1.22076	1.55427	1.57984	MAP7	T62571	Microtubule-associated protein 7
202920_at	0.892295	0.592945	1.04989	1.07031	ANK2	BF726212	Ankyrin 2, neuronal
202933_s_at	0.96852	0.879723	0.59068	0.775729	Yes; c-yes; HsT441; P61-YES	NM_005433	v-yes-1 Yamaguchi sarcoma viral oncogene homolog 1
202838_at	0.953497	1.22352	1.50163	1.7677	FUCA1	NM_000147	fucosidase, alpha-L- 1, tissue
202840_at	0.995099	1.25941	1.61179	1.13242	Npl3; RBP56; TAF2N; TAFII68; hTAFII68	NM_003487	TAF15 RNA polymerase II, TATA box binding protein (TBP)-associated factor, 68kDa
202823_at	1.01596	0.924055	0.643189	0.639037	TCEB1	N89607	Transcription elongation factor B (SIII), polypeptide 1 (15kDa, elongin C)
202871_at	1.16989	1.597	1.55167	1.58392	CART1; MLN62; RNF83	NM_004295	TNF receptor-associated factor 4
202855_s_at	1.14582	1.09788	1.60394	1.2388	SLC16A3	AL513917	Solute carrier family 16, member 3 (monocarboxylic acid transporter 4)
202856_s_at	1.11765	1.04378	1.68087	1.24685	MCT3; MCT4; MGC138472; MGC138474	NM_004207	solute carrier family 16, member 3 (monocarboxylic acid transporter 4)
202533_s_at	1.03329	1.44131	1.33366	1.56611	DHFR	BC003584	dihydrofolate reductase
202558_s_at	0.948367	1.03035	0.903647	0.654312	STCH	NM_006948	stress 70 protein chaperone, microsome-associated, 60kDa
202570_s_at	0.747019	0.601985	0.777223	0.739923	DLGAP4	BF346592	Discs, large (Drosophila) homolog-associated protein 4
202545_at	1.01306	1.058	1.30167	1.56671	MAY1; MGC49908; nPKC-delta	NM_006254	protein kinase C, delta
202487_s_at	1.1824	1.50058	1.67604	1.63664	H2AV; MGC1947; FLJ26479; MGC10170; MGC10831	NM_012412	H2A histone family, member V
202636_at	1.02552	1.37135	1.4312	1.55935	KF1; hkf-1; ZFP103; MGC41857; MGC102815	NM_005667	ring finger protein 103
202679_at	1.18258	1.36751	1.66718	1.5937	NPC	NM_000271	Niemann-Pick disease, type C1
202684_s_at	1.02452	0.814845	0.506573	0.652277	MET; RG7MT1; hCMT1c; KIAA0398; DKFZp686H1252	AB020966	RNA (guanine-7-) methyltransferase
202660_at	0.948514	0.875476	0.508388	1.18907	ITPR2	AA834576	Inositol 1,4,5-triphosphate receptor, type 2
202672_s_at	1.07876	1.2277	1.63773	1.64356	ATF3	NM_001674	activating transcription factor 3
202667_s_at	1.13979	1.21536	1.49093	1.20841	KE4; HKE4; ZIP7; RING5; H2-KE4; D6S115E; D6S2244E	NM_006979	solute carrier family 39 (zinc transporter), member 7
202586_at	0.900042	0.870513	0.831954	0.53349	POLR2L	AA772747	Polymerase (RNA) II (DNA directed) polypeptide L, 7.6kDa
202575_at	0.841096	1.02777	1.3786	1.81178	RBP6; CRABP-II	NM_001878	cellular retinoic acid binding protein 2
202581_at	0.88104	0.751403	0.738025	0.58217	HSPA1A; HSP70-2	NM_005346	heat shock 70kDa protein 1B
202605_at	1.21252	1.39689	1.52332	1.4151	MPS7; FLJ39445	NM_000181	glucuronidase, beta
203241_at	1.03267	1.20559	1.57688	1.18046	p63; DHTX	NM_003369	UV radiation resistance associated gene
203242_s_at	0.977026	1.03897	1.23096	1.43055	PDLIM5	BG054550	PDZ and LIM domain 5
203253_s_at	0.95338	0.819569	0.612784	0.659501	FLJ21506; KIAA0433	NM_015216	histidine acid phosphatase domain containing 1
203292_s_at	0.982795	0.852416	0.917534	0.618167	END1; PEP5; RNF108; hVPS11	NM_021729	vacuolar protein sorting 11 homolog (S. cerevisiae)
203203_s_at	0.84356	0.748372	0.456611	0.554595	HRB2; RIP-1	NM_007043	KRR1, small subunit (SSU) processome component, homolog (yeast)
203210_s_at	1.09867	1.24543	1.84021	1.62138	RFC36; MGC1155	NM_007370	replication factor C (activator 1) 5, 36.5kDa
203186_s_at	0.595113	0.694136	0.818913	1.03714	42A; 18A2; CAPL; FSP1; MTS1; P9KA; PEL98	NM_002961	S100 calcium binding protein A4
203198_at	1.08967	1.19542	1.45319	1.4893	TAK; C-2k; CDC2L4; PITALRE	NM_001261	cyclin-dependent kinase 9 (CDC2-related kinase)
203238_s_at	1.00456	1.30201	1.45345	2.01709	CASIL; CADASIL	NM_000435	Notch homolog 3 (Drosophila)
203235_at	1.01106	0.991089	1.47777	1.20051	MP78; EP24.15; MEPD_HUMAN	NM_003249	thimet oligopeptidase 1
203222_s_at	1.1086	1.27022	1.38255	1.52571	ESG; ESG1; GRG1	NM_005077	transducin-like enhancer of split 1 (E(sp1) homolog, Drosophila)
203372_s_at	1.05102	1.12724	1.45317	1.5542	CIS2; SSI2; Cish2; SSI-2; SOCS-2; STATI2	AB004903	suppressor of cytokine signaling 2
203397_s_at	1.08824	1.41438	1.37982	1.63098	GALNT3	BF063271	UDP-N-acetyl-alpha-D-galactosamine:polypeptide N-acetylgalactosaminyltransferase 3 (GalNAc-T3)
203319_s_at	0.900183	0.798868	0.549589	0.912487	BERF-1; BFCOL1; ZBP-89; ZFP148; pHZ-52; HT-BETA	L04282	zinc finger protein 148
203227_s_at	0.997835	0.712546	0.598329	0.707863	SAS	NM_005981	tetraspanin 31
203348_s_at	1.05321	1.22527	1.45121	1.41607	ETV5	BF060791	Ets variant gene 5 (ets-related molecule)
203335_at	1.12142	1.3478	1.51087	1.63257	RD; LN1; PAHX; LNAP1; PHYH1	NM_006214	phytanoyl-CoA 2-hydroxylase
203022_at	1.01849	1.16671	1.49701	1.22895	AGS4; JUNB; RNHL; RNHIA; RNASEHI	NM_006397	ribonuclease H2, subunit A
203027_s_at	1.15983	1.46584	1.95487	1.61727	MVD	AI189359	Mevalonate (diphospho) decarboxylase
203058_s_at	1.17009	1.5044	1.81506	2.03859	PAPSS2	AW299958	3'-phosphoadenosine 5'-phosphosulfate synthase 2
203060_s_at	0.989696	1.22643	1.68116	1.76308	SK2; ATPSK2	AF074331	3'-phosphoadenosine 5'-phosphosulfate synthase 2
203045_at	0.916123	1.3103	1.49863	1.40451	NIN1; NINJURIN	NM_004148	ninjurin 1
203046_s_at	1.109	1.14846	1.44513	1.33629	TIM; TIM1; hTIM; FLJ12640; FLJ20714	NM_003920	timeless homolog (Drosophila)
202949_s_at	1.12134	1.40656	1.73783	1.92271	DRAL; AAG11; SLIM3	NM_001450	four and a half LIM domains 2
202964_s_at	0.995734	1.05283	1.49613	1.45023	RFX5	NM_000449	regulatory factor X, 5 (influences HLA class II expression)
202935_s_at	1.0074	1.06993	1.23606	1.57534	SOX9	AI382146	Transcribed locus
202936_s_at	0.967745	1.01224	1.30999	1.52822	CMD1; SRA1; CMPD1	NM_000346	SRY (sex determining region Y)-box 9 (campomelic dysplasia, autosomal sex-reversal)
202998_s_at	0.963796	1.00333	1.16682	1.60885	LOR2; WS9-14	NM_002318	lysyl oxidase-like 2
202995_s_at	0.937695	0.954434	1.07037	1.47448	FBLN	NM_006486	fibulin 1
202975_s_at	0.976593	1.07893	0.85272	1.51761	RHOBTB3	N21138	Rho-related BTB domain containing 3
203185_at	0.995917	0.873141	1.4173	1.54597	KIAA0168; DKFZp781O1747	NM_014737	Ras association (RalGDS/AF-6) domain family 2
203159_at	1.08071	1.27525	1.50878	1.72744	GLS1; FLJ10358; KIAA0838; DKFZp686O15119	NM_014905	glutaminase
203156_at	0.969577	0.892043	0.662505	0.924173	PRKA11; AKAP220; FLJ11304; KIAA0629; DKFZp781I12161	NM_016248	A kinase (PRKA) anchor protein 11
203167_at	1.35493	1.42105	1.48514	1.39236	CSC-21K	NM_003255	TIMP metallopeptidase inhibitor 2
203081_at	1.13798	1.36773	2.08177	1.68629	ICAT; MGC15093	NM_020248	catenin, beta interacting protein 1
203066_at	1.02842	1.33472	1.40871	1.70816	GALNAC4S-6ST	NM_014863
203126_at	1.00306	1.19996	1.69337	1.5424	IMPA2	NM_014214	inositol(myo)-1(or 4)-monophosphatase 2
203080_s_at	1.02377	0.839257	0.602213	0.984752	WALp4; FLJ45644; DKFZP434H071; DKFZp762I0516	NM_013450	bromodomain adjacent to zinc finger domain, 2B
201850_at	1.16341	1.32861	1.697	1.85101	MCP; AFCP	NM_001747	capping protein (actin filament), gelsolin-like
201745_at	0.973045	0.877468	0.662477	0.797001	A6; PTK9; MGC23788; MGC41876	NM_002822	twinfilin, actin-binding protein, homolog 1 (Drosophila)
201749_at	0.865998	0.615294	0.847836	0.688626	ECE1	BF969352	Endothelin converting enzyme 1
201942_s_at	1.23249	1.12171	1.56838	1.37078	CPD	D85390	carboxypeptidase D
201961_s_at	1.18393	1.28825	1.4548	1.52592	RNF41	AL583171	Ring finger protein 41
201956_s_at	1.07739	1.21281	1.65132	1.30345	DAPAT; DAP-AT; DHAPAT	NM_014236	glyceronephosphate O-acyltransferase
201968_s_at	1.02245	1.13052	1.50978	1.38272	PGM1	NM_002633	phosphoglucomutase 1
201873_s_at	0.960958	0.865409	0.651256	0.617942	RLI; OABP; ABC38; RNS4I; RNASEL1; RNASELI	NM_002940	ATP-binding cassette, sub-family E (OABP), member 1
201571_s_at	1.17216	1.32557	1.56014	1.43848	DCTD	AI656493	DCMP deaminase
201616_s_at	0.960033	1.12521	1.09268	1.48877	CALD1	AL577531	Caldesmon 1
201595_s_at	0.995536	0.900288	0.634761	0.755246	HT010; LEREPO4; MSTP012	NM_018471	zinc finger CCCH-type containing 15
201538_s_at	1.15967	1.57701	1.99439	0.930813	VHR	NM_004090	dual specificity phosphatase 3 (vaccinia virus phosphatase VH1-related)
201559_s_at	0.794341	1.18022	1.27443	1.62209	H1; huH1; p64H1; CLIC4L; FLJ38640; DKFZP566G223	AF109196	chloride intracellular channel 4
201565_s_at	1.24565	1.3279	1.4604	1.95823	GIG8; ID2A; ID2H; MGC26389	NM_002166	inhibitor of DNA binding 2, dominant negative helix-loop-helix protein
201560_at	0.903671	1.07972	1.1924	1.52264	H1; huH1; p64H1; CLIC4L; FLJ38640; DKFZP566G223	NM_013943	chloride intracellular channel 4
201543_s_at	1.11726	1.28079	1.53252	1.19466	SAR1; Sara; SARA1; masra2	NM_020150	SAR1 gene homolog A (S. cerevisiae)
201539_s_at	0.913482	1.05617	1.60368	1.30967	FHL1B; KYO-T; SLIM1; MGC111107; bA535K18.1	U29538	four and a half LIM domains 1
201551_s_at	1.05017	1.30755	1.64405	1.53166	LAMPA; CD107a; LGP120	J03263	lysosomal-associated membrane protein 1
201548_s_at	1.07805	1.13955	1.52542	1.59303	JARID1B	W02593	za51e06.r1 Soares fetal liver spleen 1NFLS Homo sapiens cDNA clone IMAGE:296098 5', mRNA sequence.
201681_s_at	1.0805	1.19166	1.49831	1.49092	PDLG; LP-DLG; P-DLG5; KIAA0583	AB011155	discs, large homolog 5 (Drosophila)
201730_s_at	0.91427	0.887763	0.471982	0.942258	TPR	BF110993	Translocated promoter region (to activated MET oncogene)
201731_s_at	0.908936	0.74839	0.551235	0.849008	TPR	NM_003292	translocated promoter region (to activated MET oncogene)
201708_s_at	1.02269	1.15832	1.64666	1.61109	NIPSNAP1	AW083371	Nipsnap homolog 1 (C. elegans)
201712_s_at	1.02785	1.00585	0.645986	0.764366	TRP1; TRP2; NUP358	NM_006267	RAN binding protein 2
201713_s_at	0.941342	0.827263	0.541435	0.800586	TRP1; TRP2; NUP358	D42063	RAN binding protein 2
201649_at	1.09312	1.26	1.44623	1.5352	RIG-B; UBCH8; MGC40331	NM_004223	ubiquitin-conjugating enzyme E2L 6
201646_at	1.11441	1.58439	1.53698	1.82262	SCARB2	AA885297	Scavenger receptor class B, member 2
201629_s_at	1.16	1.27029	1.47123	1.17923	ACP1	BE872974	Acid phosphatase 1, soluble
201661_s_at	0.975211	1.01267	0.631646	0.862635	ACS3; FACL3; PRO2194	NM_004457	acyl-CoA synthetase long-chain family member 3
202295_s_at	0.786484	0.931406	1.19639	1.65145	CPSB; ACC-4; ACC-5; MGC1519; minichain; DKFZp686B24257	NM_004390	cathepsin H
202320_at	1.12056	1.20395	1.4707	1.19386	TFIIIC; TFIIIC220; TFIIICalpha; DKFZp686A111	NM_001520	general transcription factor IIIC, polypeptide 1, alpha 220kDa
202328_s_at	1.015	1.55589	1.21301	1.07251	PBP	NM_000296	polycystic kidney disease 1 (autosomal dominant)
202267_at	1.25571	1.33909	1.60988	1.91645	B2T; EBR2; BM600; EBR2A; LAMB2T; LAMNB2; MGC138491; MGC141938	NM_005562	laminin, gamma 2
202245_at	1.08928	1.23271	1.55104	1.50028	LSS	AW084510	Lanosterol synthase (2,3-oxidosqualene-lanosterol cyclase)
202246_s_at	1.08197	1.17598	1.49807	1.18473	CMM3; PSK-J3; MGC14458	NM_000075	cyclin-dependent kinase 4
202252_at	1.05262	1.40831	1.56513	1.40963	GIG4	NM_002870	RAB13, member RAS oncogene family
202409_at	1.02634	1.01264	1.1864	1.75727		X07868
202390_s_at	1.01114	0.885537	0.637704	1.15239	HTT; IT15	NM_002111	huntingtin (Huntington disease)
202398_at	0.953955	0.761186	0.704903	0.489311	AP3S3; sigma3b; FLJ35955	BC002785	adaptor-related protein complex 3, sigma 2 subunit
202436_s_at	1.00239	0.756963	0.721067	0.629658	CYP1B1	AU144855	Cytochrome P450, family 1, subfamily B, polypeptide 1
202446_s_at	1.13398	1.29374	1.52589	1.39943	PLSCR1	AI825926	Phospholipid scramblase 1
202447_at	0.912132	1.15588	1.46911	1.53529	DECR; NADPH	NM_001359	2,4-dienoyl CoA reductase 1, mitochondrial
202449_s_at	0.976752	1.10503	1.32559	1.52338	NR2B1; FLJ16020; FLJ16733; MGC102720	NM_002957	retinoid X receptor, alpha
202444_s_at	1.01614	1.2107	1.63709	1.33707	KE04; KEO4; SPFH1; Erlin-1; C10orf69; RP11-316M21.1	NM_006459	ER lipid raft associated 1
202422_s_at	1.00563	0.87096	0.512206	0.816963	ACS4; FACL4; LACS4; MRX63; MRX68	NM_022977	acyl-CoA synthetase long-chain family member 4
202387_at	0.95258	1.26521	1.57465	1.16129	BAG1	NM_004323	BCL2-associated athanogene
202435_s_at	0.867892	0.858255	0.64683	0.926516	CYP1B1	AU154504	Transcribed locus
202364_at	1.05005	1.20766	1.53151	1.47758	MXI; MAD2; MXD2; MGC43220	NM_005962	MAX interactor 1
202033_s_at	0.901825	0.811278	0.496988	0.896798	RB1CC1	BG402105	RB1-inducible coiled-coil 1
202079_s_at	1.15805	1.10926	1.10285	1.50745	TRAK1	AI633774	Trafficking protein, kinesin binding 1
201991_s_at	0.948339	0.847275	0.481778	0.760538	KIF5B	BF223224	Kinesin family member 5B
201992_s_at	1.00472	0.936136	0.65547	0.898101	KNS; KINH; KNS1; UKHC	NM_004521	kinesin family member 5B
201988_s_at	1.09435	1.07255	1.41579	1.4316	CREBL2	BF438056	CAMP responsive element binding protein-like 2
201971_s_at	0.922965	1.08446	1.1306	1.46833	HO68; VA68; VPP2; Vma1; ATP6A1; ATP6V1A1	NM_001690	ATPase, H+ transporting, lysosomal 70kDa, V1 subunit A
202023_at	1.04222	1.14718	1.76386	1.48478	B61; EFL1; ECKLG; EPLG1; LERK1; TNFAIP4	NM_004428	ephrin-A1
202004_x_at	1.06883	1.29376	1.52675	1.32518	CYBL; PGL3; QPS1; SDH3; CYB560	NM_003001	succinate dehydrogenase complex, subunit C, integral membrane protein, 15kDa
201986_at	0.967303	0.785755	0.625193	0.86626	MED13; ARC250; DRIP250; HSPC221; TRAP240; KIAA0593	AB011165	thyroid hormone receptor associated protein 1
202003_s_at	0.988415	1.09644	1.61768	1.61855	DSAEC	NM_006111	acetyl-Coenzyme A acyltransferase 2 (mitochondrial 3-oxoacyl-Coenzyme A thiolase)
202194_at	0.920538	0.802037	0.648725	0.731707	CGI-100	AL117354
202181_at	0.956852	1.33559	1.65537	1.4661	KIAA0247	NM_014734	KIAA0247
202101_s_at	1.12954	1.26219	1.32614	1.60892	RALB	NM_002881	v-ral simian leukemia viral oncogene homolog B (ras related; GTP binding protein)
202139_at	1.10263	1.27707	1.55264	1.46238	AFAR; AKR7; AFAR1; AFB1-AR1	NM_003689	aldo-keto reductase family 7, member A2 (aflatoxin aldehyde reductase)
202105_at	0.951001	1.09418	1.42304	1.60459	IBP1	NM_001551	immunoglobulin (CD79A) binding protein 1
202127_at	0.895727	0.929135	0.663933	1.00709	PR4H; PRP4; PRP4H; PRP4K; KIAA0536; dJ1013A10.1	AB011108	PRP4 pre-mRNA processing factor 4 homolog B (yeast)
204955_at	1.14206	1.30448	1.69783	1.98634	DRS; ETX1	NM_006307	sushi-repeat-containing protein, X-linked
204916_at	1.09114	1.11912	1.46657	1.42183	RAMP1	NM_005855	receptor (G protein-coupled) activity modifying protein 1
204984_at	1.03117	1.18179	1.60205	1.71383	K-glypican	NM_001448	glypican 4
204985_s_at	1.00663	1.25684	1.72344	1.47814	TRS33; HSPC289; MGC2650	NM_024108	trafficking protein particle complex 6A
204990_s_at	1.1117	1.00072	1.35262	1.81496	CD104	NM_000213	integrin, beta 4
204971_at	1.07752	1.24757	1.33656	1.71347	STF1; STFA	NM_005213	cystatin A (stefin A)
204975_at	1.03072	1.17543	1.45875	1.40977	XMP; MGC9056	NM_001424	epithelial membrane protein 2
204855_at	1.14061	1.57513	1.96006	2.54855	PI5; maspin	NM_002639	serpin peptidase inhibitor, clade B (ovalbumin), member 5
204856_at	0.995989	1.15432	1.44016	1.54166	TMEM3; B3GN-T3; B3GNT-3; HP10328; B3GAL-T8; beta3Gn-T3	NM_014256	UDP-GlcNAc:betaGal beta-1,3-N-acetylglucosaminyltransferase 3
204844_at	0.913687	0.80025	0.591748	0.790632	APA; CD249; gp160	L12468	glutamyl aminopeptidase (aminopeptidase A)
204980_at	0.748293	0.728713	0.441238	0.586876	KIAA0334	NM_004898	clock homolog (mouse)
204886_at	0.792955	0.80247	0.539434	0.656622	PLK4	AL043646	Polo-like kinase 4 (Drosophila)
204885_s_at	1.31672	1.38335	1.53891	1.84728	MPF; SMR; CAK1	NM_005823	mesothelin
205112_at	1.01815	1.25018	1.20196	1.55406	PLCE; NPHS3; FLJ23659; KIAA1516	NM_016341	phospholipase C, epsilon 1
205088_at	0.979736	0.981637	1.70928	1.24987	CG1; F18	NM_005491	chromosome X open reading frame 6
205085_at	1.12491	1.33873	1.64874	1.2453	ORC1; PARC1; HSORC1	NM_004153	origin recognition complex, subunit 1-like (yeast)
205087_at	0.837274	0.68914	0.623043	0.674321	DKFZP566K023	NM_015485	RWD domain containing 3
205100_at	1.05487	1.03691	1.59334	1.74501	GFAT2; FLJ10380	NM_005110	glutamine-fructose-6-phosphate transaminase 2
205166_at	1.0879	0.939011	1.11039	1.50394	HTRA3; nCL-3; FLJ46245	NM_004055	calpain 5
205042_at	1.16849	1.17507	1.48716	1.3571	NM; DMRV; IBM2; Uae1; GLCNE	NM_005476	glucosamine (UDP-N-acetyl)-2-epimerase/N-acetylmannosamine kinase
205066_s_at	1.06515	1.05564	1.0664	1.51254	M6S1; NPP1; NPPS; PC-1; PCA1; PDNP1	NM_006208	ectonucleotide pyrophosphatase/phosphodiesterase 1
205047_s_at	1.03432	1.26991	1.65988	1.33438	TS11	NM_001673	asparagine synthetase
204641_at	0.986244	0.642212	0.602419	0.734129	NLK1; NEK2A; HsPK21; HsPK 21	NM_002497	NIMA (never in mitosis gene a)-related kinase 2
204619_s_at	1.48246	1.68382	1.72172	2.39243	VCAN	BF590263	Versican
204620_s_at	1.16943	1.31558	1.27363	1.84258	WGN; ERVR; PG-M; WGN1; CSPG2; DKFZp686K06110	NM_004385	versican
204669_s_at	1.02995	1.27594	1.66564	1.61996	G1L	NM_007219	ring finger protein 24
204678_s_at	0.891775	1.05313	1.3627	1.52369	DPK; HOHO; TWIK1; K2p1.1; TWIK-1	U90065	potassium channel, subfamily K, member 1
204622_x_at	1.16636	1.346	1.09398	1.174	NOT; RNR1; HZF-3; NURR1; TINUR	NM_006186	nuclear receptor subfamily 4, group A, member 2
204554_at	1.13555	1.50911	1.91285	1.35964	PPP1R3D	AL109928
204519_s_at	1.24262	1.159	1.34202	1.90472	PMLP; TM4SF11	NM_015993	plasma membrane proteolipid (plasmolipin)
204524_at	0.999127	1.16427	1.96685	0.96675	PDK1; PRO0461; MGC20087; MGC35290; PkB-like; PkB-like 1	NM_002613	3-phosphoinositide dependent protein kinase-1
204589_at	1.0563	1.17704	1.32605	1.50244	ARK5; KIAA0537	NM_014840	NUAK family, SNF1-like kinase, 1
204603_at	1.02985	1.19022	1.50812	1.21992	HEX1; hExoI	NM_003686	exonuclease 1
204767_s_at	1.00895	1.1705	1.59594	1.2812	MF1; RAD2; FEN-1	BC000323	flap structure-specific endonuclease 1
204780_s_at	0.780047	1.0613	1.14401	1.33171	FAS	AA164751	Fas (TNF receptor superfamily, member 6)
204798_at	0.94491	1.21291	1.63279	1.51757	efg; Cmyb; c-myb; c-myb_CDS	NM_005375	v-myb myeloblastosis viral oncogene homolog (avian)
204695_at	1.07953	1.32415	1.74302	1.36409	CDC25A	AI343459	Cell division cycle 25 homolog A (S. pombe)
204731_at	1.07038	1.51885	2.20804	1.79227	BGCAN; betaglycan	NM_003243	transforming growth factor, beta receptor III
204732_s_at	0.966243	0.898704	0.508291	0.831246	TRIM23	AI021991	Tripartite motif-containing 23
204733_at	1.10407	1.54184	1.83861	1.90601	hK6; Bssp; Klk7; SP59; ZYME; PRSS9; PRSS18; MGC9355; NEUROSIN	NM_002774	kallikrein-related peptidase 6
204739_at	1.1414	1.08611	0.559783	1.07984	MIF2; CENPC; hcp-4; CENP-C	NM_001812	centromere protein C 1
205646_s_at	1.03622	1.15276	1.36313	1.49616	AN; AN2; MGDA; WAGR; D11S812E; MGC17209	NM_000280	paired box gene 6 (aniridia, keratitis)
205716_at	0.980143	0.934449	1.28778	1.45235	MCFP	NM_018843	solute carrier family 25, member 40
205731_s_at	0.883543	0.952742	0.62776	0.924681	NCOA2	AW027474	Nuclear receptor coactivator 2
205732_s_at	1.16616	0.966545	1.26166	1.58434	TIF2; GRIP1; NCoA-2; MGC138808	NM_006540	nuclear receptor coactivator 2
205547_s_at	1.13947	0.855857	0.540362	0.39759	SM22; SMCC; TAGLN1; WS3-10; DKFZp686P11128	NM_003186	transgelin
205919_at	1.03623	1.19014	1.54371	1.44062	HBE	NM_005330	hemoglobin, epsilon 1
205924_at	1.03655	1.21933	1.12718	1.80769	RAB3B	BC005035	RAB3B, member RAS oncogene family
205926_at	0.958507	0.93584	1.52593	0.89227	CRL1; TCCR; WSX1; IL27R; zcytor1	NM_004843	interleukin 27 receptor, alpha
205761_s_at	0.91142	0.828191	0.868091	0.61647	PP35	AW242981	xm91g11.x1 NCI_CGAP_Kid11 Homo sapiens cDNA clone IMAGE:2691620 3' similar to TR:O95620 O95620 PP35. [1] ;, mRNA sequence.
205762_s_at	0.892253	0.908901	0.58536	0.71112	DUS4L	NM_007016	dihydrouridine synthase 4-like (S. cerevisiae); synonyms: DUS4, PP35, MGC133233; protein similar to E.coli yhdg and R. capsulatus nifR3; 2310069P03Rik; Homo sapiens dihydrouridine synthase 4-like (S. cerevisiae) (DUS4L), mRNA.
205770_at	1.18991	1.29268	1.37823	1.28755	MGC78522	NM_000637	glutathione reductase
205739_x_at	0.794519	0.653275	0.334632	0.780777	ZFD25; smap-7	NM_016220	zinc finger protein 588
205749_at	1.28974	0.812925	0.653674	0.506358	AHH; AHRR; CP11; CYP1; P1-450; P450-C; P450DX	NM_000499	cytochrome P450, family 1, subfamily A, polypeptide 1
205805_s_at	1.11066	1.32827	1.28129	1.64918	NTRKR1; MGC99659; dJ537F10.1	NM_005012	receptor tyrosine kinase-like orphan receptor 1
205835_s_at	1.19192	1.17575	1.38573	1.49783	YTHDC2	AW975818	YTH domain containing 2
205822_s_at	0.882911	1.13071	1.32686	1.63729	HMGCS; MGC90332	NM_002130	3-hydroxy-3-methylglutaryl-Coenzyme A synthase 1 (soluble)
205750_at	1.01416	1.46752	1.45677	1.71178	MCNAA; Bph-rp; MGC41865; MGC125930	NM_004332	biphenyl hydrolase-like (serine hydrolase; breast epithelial mucin-associated antigen)
205796_at	1.18175	1.36412	1.86646	1.57741	FLJ11336; FLJ11386; dJ85M6.3	NM_018393	t-complex 11 (mouse)-like 1
205265_s_at	0.779369	0.577661	0.892207	0.796867	APEG1	NM_005876	aortic preferentially expressed protein 1
205278_at	1.03118	1.42177	1.46459	1.95722	GAD; SCP; FLJ45882	NM_000817	glutamate decarboxylase 1 (brain, 67kDa)
205330_at	0.985772	1.18075	1.81	1.53925	MGCR; MGCR1; MGCR1-PEN; dJ353E16.2	NM_002430	meningioma (disrupted in balanced translocation) 1
205198_s_at	1.0297	1.27283	1.25255	1.54787	MK; MNK	NM_000052	ATPase, Cu++ transporting, alpha polypeptide (Menkes syndrome)
205178_s_at	0.994179	0.964479	0.533743	1.09134	MY038; P2P-R; RBQ-1; DKFZp686P0638; DKFZp761B2423	NM_006910	retinoblastoma binding protein 6
205233_s_at	0.956568	0.586973	0.493338	0.488896	FLJ26025; HSD-PLA2	NM_000437	platelet-activating factor acetylhydrolase 2, 40kDa
205226_at	1.00662	1.18155	1.50383	1.58671	PDGRL; PRLTS	NM_006207	platelet-derived growth factor receptor-like
205235_s_at	1.00944	0.590923	0.425631	0.832974	MPP1; KRMP1; MPP-1; DKFZp434B0435; DKFZp434P0810	NM_016195	M-phase phosphoprotein 1
205222_at	1.00473	0.74557	0.536386	0.745545	LBP; ECHD; LBFP; PBFE; MGC120586	NM_001966	enoyl-Coenzyme A, hydratase/3-hydroxyacyl Coenzyme A dehydrogenase
205462_s_at	1.28529	1.22041	1.46408	1.61061	BDR1; HLP2; VILIP-3	NM_002149	hippocalcin-like 1
205437_at	1.0668	1.2839	1.65088	1.2974	ZNF-25; ZNFC25; C2H2-25; CH2H2-25; MGC131841	NM_006385	zinc finger protein 211
205497_at	0.93758	0.79317	0.666289	0.636871	OTK18	NM_007147	zinc finger protein 175
205521_at	0.997428	1.36176	1.58585	1.32056	ENDOGL1	BF511976	Endonuclease G-like 1
205515_at	1.07543	1.40551	1.5008	2.02896	MRT1; BSSP3; BSSP-3; MGC12722; MOTOPSIN	NM_003619	protease, serine, 12 (neurotrypsin, motopsin)
205479_s_at	1.04173	0.93756	1.37322	1.61647	ATF; UPA; URK; u-PA	NM_002658	plasminogen activator, urokinase
205483_s_at	1.14917	1.27698	1.38816	1.30713	G1P2; UCRP; IFI15	NM_005101	ISG15 ubiquitin-like modifier
205376_at	0.796341	0.57561	0.710665	0.733802	MGC132014	NM_003866	inositol polyphosphate-4-phosphatase, type II, 105kDa
205342_s_at	1.10868	2.16171	2.28549	2.31429	ST1C1; ST1C2; SULT1C1; SULT1C#1; humSULTC2	AF026303	sulfotransferase family, cytosolic, 1C, member 2
205347_s_at	1.00914	1.21626	1.56192	1.71468	TMSNB	NM_021992	thymosin-like 8
205427_at	0.939073	0.795547	0.651138	0.850822	EZNF; HKL1; KID1; KID-1; TCF17	NM_005649	zinc finger protein 354A
205428_s_at	1.06799	1.08546	1.44942	1.68878	CAL2	NM_001740	calbindin 2, 29kDa (calretinin)
205395_s_at	0.980495	1.08283	0.942656	1.77575	ATLD; HNGS1; MRE11; MRE11B	NM_005590	MRE11 meiotic recombination 11 homolog A (S. cerevisiae)
205398_s_at	0.743786	0.677725	0.500294	0.588137	MADH3; JV15-2; Smad 3; HSPC193; HsT17436; MGC60396; DKFZP586N0721; DKFZp686J10186	NM_005902	SMAD family member 3
203765_at	0.86851	0.775477	0.537436	0.705415	GCL	NM_012198	grancalcin, EF-hand calcium binding protein
203771_s_at	1.05759	1.21031	1.54736	1.44192	BLVRA	AA740186	Biliverdin reductase A
203773_x_at	0.873711	0.933633	1.43067	1.32477	BLVR; BVRA	NM_000712	biliverdin reductase A
203778_at	0.973311	1.16067	1.48796	1.50392	MANB1	NM_005908	mannosidase, beta A, lysosomal
203795_s_at	1.07943	1.18315	1.50054	1.36355	BCL7	NM_020993	B-cell CLL/lymphoma 7A
203695_s_at	0.949411	0.981801	1.47219	1.65471	ICERE-1	NM_004403	deafness, autosomal dominant 5
203736_s_at	0.945402	0.952369	1.11306	1.48212	L2; hSGT2; hSgt2p	NM_003622	PTPRF interacting protein, binding protein 1 (liprin beta 1)
203739_at	1.25004	1.25439	1.37434	1.76452	ZABC1	NM_006526	zinc finger protein 217
203925_at	0.890892	0.669881	0.649029	0.547562	GLCLR	NM_002061	glutamate-cysteine ligase, modifier subunit
203961_at	1.16943	1.38465	1.21642	1.49973	NEBL	AL157398
203939_at	1.15163	1.10927	1.21284	1.62347	NT; eN; NT5; NTE; eNT; CD73; E5NT	NM_002526	5'-nucleotidase, ecto (CD73)
203840_at	1.02186	0.81849	0.523687	0.777372	JEM1; JEM-1; JEM-1s; MGC22497; GOLGIN-45	NM_003666	basic leucine zipper nuclear factor 1 (JEM-1)
203836_s_at	1.08206	1.29035	1.5734	1.59485	ASK1; MEKK5; MAPKKK5	D84476	mitogen-activated protein kinase kinase kinase 5
203890_s_at	0.955108	1.20633	1.40265	1.2406	DAPK3	BF686824	Death-associated protein kinase 3
203891_s_at	1.01678	0.960627	1.47941	1.12472	ZIP; ZIPK; FLJ36473	NM_001348	death-associated protein kinase 3
203883_s_at	1.02531	0.992697	0.616219	0.926615	RAB11FIP2	BG249608	RAB11 family interacting protein 2 (class I)
203879_at	0.896898	0.569213	1.2245	1.48885	p110D	U86453	phosphoinositide-3-kinase, catalytic, delta polypeptide
203520_s_at	1.10968	1.20408	1.50369	1.37088	ZNF318	AW613549	Zinc finger protein 318
203499_at	1.10389	1.24684	1.56217	1.89232	ECK	NM_004431	EPH receptor A2
203538_at	1.06157	1.28697	1.39913	1.61671	CAML; MGC163197	NM_001745	calcium modulating ligand
203557_s_at	1.18973	1.2867	1.42941	1.24611	PCD; PHS; DCOH; PCBD	NM_000281	pterin-4 alpha-carbinolamine dehydratase/dimerization cofactor of hepatocyte nuclear factor 1 alpha (TCF1)
203526_s_at	0.956251	0.852193	0.615302	1.01523	GS; DP2; DP3; FAP; FPC; DP2.5	M74088	adenomatosis polyposis coli
203528_at	1.15995	1.34249	1.85287	1.51456	CD100; SEMAJ; coll-4; M-sema G; M-sema-G	NM_006378	sema domain, immunoglobulin domain (Ig), transmembrane domain (TM) and short cytoplasmic domain, (semaphorin) 4D
203525_s_at	0.878227	0.662012	0.53039	0.68992	APC	AI375486	Adenomatosis polyposis coli
203533_s_at	1.04249	0.935073	0.654902	0.787488	VACM1; VACM-1	NM_003478	cullin 5
203453_at	1.09673	1.38312	1.74058	1.88903	ENaCa; SCNEA; SCNN1; FLJ21883; ENaCalpha	NM_001038	sodium channel, nonvoltage-gated 1 alpha
203427_at	1.02602	0.781156	0.583466	0.657413	CIA; CGI-98; HSPC146; DKFZP547E2110	NM_014034	ASF1 anti-silencing function 1 homolog A (S. cerevisiae)
203454_s_at	1.04495	1.20723	1.16721	1.56895	ATX1; HAH1; MGC138453; MGC138455	NM_004045	ATX1 antioxidant protein 1 homolog (yeast)
203455_s_at	0.909844	0.926632	1.1807	1.52736	SAT; DC21; KFSD; SSAT; SSAT-1	NM_002970	spermidine/spermine N1-acetyltransferase 1
203638_s_at	1.07767	1.32355	1.72336	1.56777	FGFR2	NM_022969	fibroblast growth factor receptor 2 (bacteria-expressed kinase, keratinocyte growth factor receptor, craniofacial dysostosis 1, Crouzon syndrome, Pfeiffer syndrome, Jackson-Weiss syndrome); synonyms: BEK, JWS, CEK3, CFD1, ECT1, KGFR, TK14, TK25, BFR-1, CD332, K-SAM; isoform 2 precursor is encoded by transcript variant 2; hydroxyaryl-protein kinase; protein tyrosine kinase, receptor like 14; FGF r…
203639_s_at	0.906809	1.40602	1.67781	1.93225	BEK; JWS; CEK3; CFD1; ECT1; KGFR; TK14; TK25; BFR-1; CD332; K-SAM	M80634	fibroblast growth factor receptor 2 (bacteria-expressed kinase, keratinocyte growth factor receptor, craniofacial dysostosis 1, Crouzon syndrome, Pfeiffer syndrome, Jackson-Weiss syndrome)
203640_at	0.901048	0.751058	0.649963	0.822856	MBNL2	BE328496	hs98f09.x1 NCI_CGAP_Kid13 Homo sapiens cDNA clone IMAGE:3145289 3', mRNA sequence.
203636_at	0.748715	0.739656	0.665023	0.493527	MID1	BE967532	Transcribed locus
203632_s_at	0.937126	1.08313	1.58652	1.37646	RAIG2; RAIG-2	NM_016235	G protein-coupled receptor, family C, group 5, member B
203671_at	1.02043	0.933888	1.60534	1.22205	TPMT	BF196891	Thiopurine S-methyltransferase
203656_at	1.06235	1.29264	1.54164	1.49316	SAC3; hSac3; dJ249I4.1; RP1-249I4.1	NM_014845	KIAA0274
203664_s_at	1.17228	1.21255	1.44977	1.14522	RBP4; HSRBP4; HSRPB4	NM_004805	polymerase (RNA) II (DNA directed) polypeptide D
203579_s_at	1.07793	1.26269	1.49173	1.41918	SLC7A6	AI660619	Solute carrier family 7 (cationic amino acid transporter, y+ system), member 6
203584_at	0.892962	0.727043	0.54594	0.645136	KIAA0103	NM_014673	tetratricopeptide repeat domain 35
203589_s_at	1.09042	1.57676	1.43542	2.05668	DP2; Dp-2	NM_006286	transcription factor Dp-2 (E2F dimerization partner 2)
203571_s_at	1.03054	1.29164	1.81103	1.9972	APM2	NM_006829	chromosome 10 open reading frame 116
203593_at	0.945813	0.764107	0.446284	0.67513	CMS; DKFZP586H0519	NM_012120	CD2-associated protein
203590_at	0.806625	0.846925	0.55623	0.920609	LIC2; DNCLI2	NM_006141	dynein, cytoplasmic 1, light intermediate chain 2
203604_at	1.05899	1.35936	1.47401	1.50916	ZNF516	N38750	Zinc finger protein 516
204332_s_at	1.05635	1.08097	1.52291	1.1843	GA; AGU; ASRG	M64073	aspartylglucosaminidase
204364_s_at	0.950921	1.11415	1.46797	1.63695	REEP1	BE535746	Receptor accessory protein 1
204347_at	1.09902	1.15539	1.5588	1.19318	AK3	AI653169	Transcribed locus
204344_s_at	1.19234	1.24604	1.54984	1.42927	CLSD; MGC26267	NM_006364	Sec23 homolog A (S. cerevisiae)
204249_s_at	0.996089	1.14684	1.41863	1.52687	TTG2; RBTN2; RHOM2; RBTNL1	NM_005574	LIM domain only 2 (rhombotin-like 1)
204257_at	1.151	1.35455	1.62965	1.34493	CYB5RP; LLCDL3	NM_021727	fatty acid desaturase 3
204258_at	1.05356	0.96576	0.610654	0.866212	DKFZp686E2337	NM_001270	chromodomain helicase DNA binding protein 1
204240_s_at	1.00456	0.984589	0.666228	0.885785	CAPE; CAP-E; SMC2L1; hCAP-E; FLJ10093	NM_006444	structural maintenance of chromosomes 2
204235_s_at	1.01188	0.829792	0.471353	0.78209	CED6; GULP; CED-6; FLJ31156	AF200715	GULP, engulfment adaptor PTB domain containing 1
204237_at	0.955164	0.679449	0.488762	0.656864	CED6; GULP; CED-6; FLJ31156	NM_016315	GULP, engulfment adaptor PTB domain containing 1
204244_s_at	0.900288	0.672836	0.609942	0.688737	ASK; chif; DBF4A; ZDBF1	NM_006716	DBF4 homolog (S. cerevisiae)
204286_s_at	0.97506	1.08233	1.02724	1.65078	APR; NOXA	NM_021127	phorbol-12-myristate-13-acetate-induced protein 1
204285_s_at	0.991763	1.08855	1.08629	1.54475	PMAIP1	AI857639	Phorbol-12-myristate-13-acetate-induced protein 1
204291_at	0.848691	0.63384	0.372503	0.55849	MGC125707; MGC125710; DKFZp781O2147	NM_014803	zinc finger protein 518
204268_at	1.06176	1.14667	1.53869	1.69875	CAN19; S100L; MGC111539	NM_005978	S100 calcium binding protein A2
204279_at	1.07028	1.43229	1.63172	1.97701	LMP2; RING12; MGC70470	NM_002800	proteasome (prosome, macropain) subunit, beta type, 9 (large multifunctional peptidase 2)
204440_at	0.996538	1.24093	1.67359	1.2969	BL11; HB15	NM_004233	CD83 molecule
204455_at	0.942093	0.732766	0.580906	0.847873	BPA; DMH; BP240; BPAG1; MACF2; CATX-15; D6S1101; FLJ46791; KIAA0465; KIAA1470; DKFZp564B2416	NM_001723	dystonin
204373_s_at	0.895118	0.883919	0.522822	0.819949	gm133; CAP350; FLJ38282; FLJ44058; KIAA0480; RP11-502H18.1	NM_014810	centrosomal protein 350kDa
204379_s_at	0.970742	1.19825	1.35953	1.54401	ACH; CEK2; JTK4; CD333; HSFGFR3EX	NM_000142	fibroblast growth factor receptor 3 (achondroplasia, thanatophoric dwarfism)
204435_at	0.917601	0.9433	0.642079	0.611725	NUPL1	NM_014778
204055_s_at	0.880643	0.715359	0.624382	0.620421	MEA6; MGEA; MGEA6; MGEA11	NM_005930	CTAGE family, member 5
204049_s_at	0.930647	0.906068	0.612352	0.938036	C6orf56; KIAA0680; DKFZp686F18175	NM_014721	phosphatase and actin regulator 2
204037_at	1.32881	1.38541	1.64293	1.581	EDG2	BF055366	Endothelial differentiation, lysophosphatidic acid G-protein-coupled receptor, 2
204078_at	0.799621	0.586002	0.637369	0.725382	SC65; NOL55	NM_006455	synaptonemal complex protein SC65
204019_s_at	1.09187	1.29941	1.33525	1.53187	Ray; FLJ39121; DKFZP586F1318	NM_015677	SH3 domain containing, Ysc84-like 1 (S. cerevisiae)
204218_at	0.944209	0.715639	0.79417	0.586743	HSPC020; DKFZP564M082	NM_014042	chromosome 11 open reading frame 51
204224_s_at	1.0306	1.14003	1.55297	1.50659	GCH; DYT5; GTPCH1; GTP-CH-1	NM_000161	GTP cyclohydrolase 1 (dopa-responsive dystonia)
204226_at	1.00724	1.20082	1.12459	1.67534	39K2; 39K3; MGC119606; DKFZp781K0371	NM_014393	staufen, RNA binding protein, homolog 2 (Drosophila)
204133_at	0.943728	0.860637	0.896634	0.65736	U3-55K; RNU3IP2	NM_004704	RRP9, small subunit (SSU) processome component, homolog (yeast)
1557137_at	0.983714	1.09349	1.44285	1.69404	TMEM17	AA084725	Transmembrane protein 17
1557112_a_at	1.15225	1.21369	1.53983	1.16387	FLJ10979	CA425979	Full length insert cDNA clone YR50A02
1557217_a_at	0.820696	1.14293	0.750402	1.35845	FA2; FAB; FACB; FAAP90; FAAP95	BC043596	Fanconi anemia, complementation group B
1557218_s_at	0.940163	0.925149	1.16251	1.35445	FA2; FAB; FACB; FAAP90; FAAP95	BC043596	Fanconi anemia, complementation group B
1556821_x_at	1.00331	1.04128	0.63437	1.00688	DLEU2	H48516	Deleted in lymphocytic leukemia, 2
1557014_a_at	0.972187	0.758376	0.896479	0.648833	C9orf122	BC041970	chromosome 9 open reading frame 122
1557055_s_at	1.12033	1.25542	1.59688	1.14488	LOC643837	BC042880	hypothetical protein LOC643837
1557227_s_at	1.07894	1.30511	0.596251	1.41105	TPR	AW235355	Translocated promoter region (to activated MET oncogene)
1556931_at	1.05653	1.46871	1.27747	1.57409	CDC42	AF086337	Full length insert cDNA clone ZD58F06
1557551_at	1.15322	1.16236	1.20339	1.57909	PSCD1	CA442689	Transcribed locus
1557316_at	1.22384	1.78788	2.05838	1.71491	STK24	BG567552	Transcribed locus
1555974_a_at	0.99002	0.84961	0.644368	0.432966	FLJ39051	BU617042	Partial mRNA; ID YG81-5A
1555929_s_at	1.02468	1.67769	1.18513	1.72305	CCBE1	BM873997	CDNA FLJ30680 fis, clone FCBBF2000123
1555933_at	1.01137	1.13858	0.673845	0.606647	MGC33867; RP5-1077B9.1	AB095933	KIAA2013
1555829_at	1.01481	1.2467	1.28458	1.29627	KIAA1228	BC001224	Homo sapiens cDNA clone IMAGE:3354306, **** WARNING: chimeric clone ****.
1555872_a_at	0.936088	0.742063	0.826868	0.655001	MGC21881	BC019880	hypothetical locus MGC21881
1556389_at	1.22993	1.44996	1.86085	1.5101	CAG4A; ERDA5; PRAT4A	AF161347	trinucleotide repeat containing 5
1556347_at	0.964847	0.921057	0.626767	0.897587	CENPP	W72151	Full length insert cDNA clone ZD70G04
1556126_s_at	0.943206	0.634068	0.626124	0.707883	GPATCH2	BM668595	G patch domain containing 2
1556121_at	1.03802	1.08937	0.625008	0.89917	NAP1L1	AK021751	CDNA FLJ11689 fis, clone HEMBA1004977
1556318_s_at	0.963661	0.851623	0.648111	1.03266	TIP120A	N21434	Full length insert cDNA YQ07B06
1559425_at	1.04694	1.24057	1.51809	1.46758	PRKCH	AL512701	MRNA; cDNA DKFZp667O095 (from clone DKFZp667O095)
1559126_at	1.0219	0.802822	0.733071	0.5485	FLJ20231; KIAA0690; DKFZp762P1116	BC042908	ribosomal RNA processing 12 homolog (S. cerevisiae)
1559048_at	0.926441	0.927215	0.635632	0.762161	BAHCC1	AA331299	BAH domain and coiled-coil containing 1
1559060_a_at	1.04893	0.719384	0.646302	0.598767	FNIP1	BF677986	Folliculin interacting protein 1
1559171_at	0.955079	1.00581	1.49	1.16386	MGC57346	BG819763	Hypothetical LOC401884
1559214_at	0.91889	1.14863	0.601876	1.02842		AL360145	MRNA full length insert cDNA clone EUROIMAGE 839551
1560434_x_at	1.06578	0.974745	1.19432	0.582206		AK055960	CDNA FLJ31398 fis, clone NT2NE1000175
1560048_at	1.20216	1.48844	0.759827	1.15308		BM041827	CDNA FLJ30026 fis, clone 3NB692001123
1560069_at	1.14779	1.35979	1.53442	1.64548	LOC389072; FLJ41210	BC020812	hypothetical protein LOC389072
1558250_s_at	0.996883	0.902509	0.537398	0.890445		AI538880	CDNA FLJ40891 fis, clone UTERU2001110
1558401_at	0.979016	1.43771	1.53984	1.725	LOC339524	AW953994	CDNA FLJ37332 fis, clone BRAMY2019710
1558381_a_at	0.96449	0.929439	0.890862	0.635235	GAPDS	AA322821	Homo sapiens, clone IMAGE:3830652, mRNA
1557950_at	0.97835	0.94927	0.428968	0.856538	SDCCAG1	BF984340	Serologically defined colon cancer antigen 1
1557895_at	0.842996	0.746692	0.526354	0.784465	FLJ35934	BC033201	FLJ35934 protein
1558014_s_at	0.949247	0.899194	0.561154	0.760663	MLSTD2	BG261090	Male sterility domain containing 2
1558017_s_at	0.978006	1.57171	1.08721	1.47756	DST	BG109597	CDNA FLJ14942 fis, A-PLACE1011185
1558021_at	1.10445	0.894987	0.638697	0.559485	p40; RAB9P40; bA65N13.1; DKFZp686P1077	AL832249	Rab9 effector protein with kelch motifs
1558948_a_at	1.1324	0.835468	0.7675	0.638808	OIP5	AF086478	Full length insert cDNA clone ZD90B10
1558956_s_at	0.806313	0.767335	0.466856	0.811148	IFT80	AI473255	Intraflagellar transport 80 homolog (Chlamydomonas)
1558522_at	0.952093	0.753453	0.645878	0.627969		BC013077	Homo sapiens, clone IMAGE:3459334, mRNA
1558561_at	1.12792	1.38816	1.38009	1.60655	H13; SPP; IMP1; PSL3; IMPAS; PSENL3; MSTP086; dJ324O17.1	AK074686	histocompatibility (minor) 13
1558466_at	1.14121	1.19865	0.769269	1.56239	MAP2	BE156619	Clone IMAGE:125405, mRNA sequence
1558675_s_at	0.853331	0.861786	0.438067	0.797206	SDCCAG1	AV724508	Serologically defined colon cancer antigen 1
1553603_s_at	0.893966	0.83404	0.603177	1.01316	ATL2; ARL3IP2; FLJ23293; atlastin2	NM_022374	ADP-ribosylation factor-like 6 interacting protein 2
1553694_a_at	0.922343	1.00548	0.589843	1.15673	CPK; MGC142218; PI3-K-C2A; DKFZp686L193; PI3-K-C2(ALPHA)	NM_002645	phosphoinositide-3-kinase, class 2, alpha polypeptide
1553719_s_at	0.889057	0.621514	0.806652	0.774736	FLJ32932	NM_152909	zinc finger protein 548
1553726_s_at	0.770559	0.786916	0.439125	0.873199	C6orf171; FLJ30899; FLJ34235; bA57L9.1; bA301B7.2; dJ310J6.1	NM_152730	chromosome 6 open reading frame 170
1553684_at	0.938936	0.547486	0.5626	0.440673	MGC41939; bA425D10.6; dJ919F19.1	NM_173672	peptidylprolyl isomerase (cyclophilin)-like 6
1553224_at	0.947895	0.615359	0.809079	0.92558	LUZP; FLJ35697; KIAA0601	NM_033631	leucine zipper protein 1
1553227_s_at	0.889538	0.888615	0.562598	1.07565	N143; WDR9; FLJ43918; C21orf107	NM_018963	bromodomain and WD repeat domain containing 1
1553172_at	0.964897	0.833891	0.856229	0.64419	KIAA1285	NM_015694	zinc finger protein 777
1554020_at	1.03092	0.766919	0.687521	0.662856	BICD	BC010091	bicaudal D homolog 1 (Drosophila)
1554091_a_at	1.04454	1.04101	1.51049	1.14807	Mal; wyatt; FLJ42305	BC032474	toll-interleukin 1 receptor (TIR) domain containing adaptor protein
1554086_at	0.927351	0.692554	0.915576	0.64653	GCP3; SPBC98; Spc98p	BC007763	tubulin, gamma complex associated protein 3
1553768_a_at	1.13952	1.65112	1.70426	1.78333	MGC46341; dJ94G16.1; DKFZp686L21135	NM_173674	discoidin, CUB and LCCL domain containing 1
1553801_a_at	1.00334	0.925249	0.785947	0.565045	MGC9912	NM_080664	chromosome 14 open reading frame 126
1552486_s_at	1.01649	1.46854	1.79891	1.46491	G24; MRPL56; FLJ14902	NM_171846	lactamase, beta
1552470_a_at	1.21016	1.15418	1.62167	1.3877	WBSCR21	NM_148914	Williams Beuren syndrome chromosome region 21
1552621_at	1.04139	1.27836	1.39578	1.54392	POLR2J4	BQ613856	Polymerase (RNA) II (DNA directed) polypeptide J, 13.3kDa pseudogene
1552619_a_at	0.796374	0.695322	0.621935	0.817691	scra; Scraps; ANILLIN; DKFZp779A055	NM_018685	anillin, actin binding protein
1552632_a_at	1.03684	1.32902	1.60604	1.42757	KIAA1001	BC012375	arylsulfatase G
1552611_a_at	1.14035	1.91019	1.32824	1.58072	JAK1	AL555086	Janus kinase 1 (a protein tyrosine kinase)
1316_at	0.949312	0.95542	0.867542	0.620019	AR7; EAR7; ERBA; ERBA1; NR1A1; THRA1; THRA2; ERB-T-1; MGC43240; c-ERBA-1; MGC000261	X55005	thyroid hormone receptor, alpha (erythroblastic leukemia viral (v-erb-a) oncogene homolog, avian)
1552263_at	0.897286	0.783172	0.727855	0.516552	ERK; p38; p40; p41; ERK2; ERT1; MAPK2; PRKM1; PRKM2; P42MAPK; p41mapk	NM_138957	mitogen-activated protein kinase 1
1552978_a_at	1.21846	1.48269	1.35458	1.77171	SCAMP1	NM_052822	secretory carrier membrane protein 1
1552897_a_at	1.08073	1.37078	1.21275	1.54353	KV6.3; KV10.1	NM_133329	potassium voltage-gated channel, subfamily G, member 3
1552947_x_at	1.0419	0.926687	0.778584	0.588624	MGC17986; MGC149700	NM_153608	zinc finger protein 114
1553133_at	0.903288	0.583168	0.764588	0.889659	MGC23980; RP11-27J8.2	BC020851	chromosome 9 open reading frame 72
1553148_a_at	0.904167	1.39207	1.09369	1.68758	SNX13	R75838	Sorting nexin 13
1553158_at	1.10046	1.13121	1.60431	1.52789	MGC14126	AY099509	chromosome 3 open reading frame 34
1553106_at	1.03297	0.77434	0.612173	0.580005	FLJ37562	NM_152409	chromosome 5 open reading frame 24
1555226_s_at	1.03377	1.10069	1.40535	1.22004	NICE-3; S863-3; HSPC012; NS5ATP4; MGC111001; DKFZp586G1722	BC008306	chromosome 1 open reading frame 43
1555247_a_at	1.00299	1.00565	0.642346	0.990626	PDZGEF2; KIA001LB; PDZ-GEF2; RA-GEF-2; DKFZp667N084; DKFZp686I15116	AF394782	Rap guanine nucleotide exchange factor (GEF) 6
1555334_s_at	1.0458	1.30096	1.45919	1.34904	ZTL1	AF439324	hZTL1; Homo sapiens zinc transporter ZTL1 (ZTL1) mRNA, complete cds.
1555734_x_at	1.17928	1.25287	1.32978	1.24465	AP1S3	AF393369	adaptor-related protein complex 1, sigma 3 subunit
1555786_s_at	0.887661	0.859621	0.643604	0.756517		BC008034	Homo sapiens cDNA clone IMAGE:2967039, **** WARNING: chimeric clone ****.
1555742_at	1.34639	1.16148	1.02001	1.02933		U92817	Homo sapiens unnamed HERV-H protein mRNA, complete cds.
1555679_a_at	1.12402	1.05462	1.54857	0.999825	NIMP; MGC12934	AF439711	reticulon 4 interacting protein 1
1555384_a_at	0.975821	0.856972	0.619894	0.853985	PP13296; MGC74631; DKFZp686E039	BC022377	La ribonucleoprotein domain family, member 4
1555526_a_at	0.955052	1.19025	1.19931	1.48877	SEP2; SEPT2; KIAA0128; MGC16619; MGC20339; RP5-876A24.2	AF403061	septin 6
1554342_s_at	1.12728	1.39652	1.58352	1.54158	HEL308; MGC20604	BC011863	DNA helicase HEL308
1554262_s_at	1.22374	1.33872	1.45864	1.61499	KBTBD9	BC015667	kelch-like 29 (Drosophila)
1554283_at	0.9192	0.877341	0.774529	0.647824	NOC; CCR4L; MGC78549; MGC142054; MGC142060; MGC4120817	BC021963	CCR4 carbon catabolite repression 4-like (S. cerevisiae)
1554429_a_at	0.961037	0.922374	0.867769	0.611096	DMRN9; DMR-N9; gene59; D19S593E	BC019266	dystrophia myotonica, WD repeat containing
1554388_at	1.0341	1.6326	2.04567	1.90963	DC7; DC15; PEP11; FLJ20492; DKFZp564F0223	BC032462	vacuolar protein sorting 29 homolog (S. cerevisiae)
1554321_a_at	1.13869	1.61814	1.41231	1.47609	IscS; NIFS; HUSSY-08	BC018471	NFS1 nitrogen fixation 1 homolog (S. cerevisiae)
1554411_at	1.09157	1.26033	1.40756	1.55601	CTNNB; FLJ25606; FLJ37923; DKFZp686D02253	AB062292	catenin (cadherin-associated protein), beta 1, 88kDa
1554106_at	1.03225	1.34509	1.25535	1.52032	ALS2CR16	AB053318	amyotrophic lateral sclerosis 2 (juvenile) chromosome region, candidate 16
1554114_s_at	0.960404	0.697433	0.522473	0.6722	SSH-2; KIAA1725; MGC78588	AB072359	slingshot homolog 2 (Drosophila)
1554176_a_at	1.06304	0.951262	0.581828	0.712244	FLJ31139	AF115515	chromosome 3 open reading frame 33
1554646_at	0.979972	0.665531	0.831195	0.781526	ORP1; ORP-1; OSBPL1B; FLJ10217	BC041563	oxysterol binding protein-like 1A
1554606_at	1.03283	1.20041	0.855609	1.36292	FLJ36090; FLJ38327; DKFZp686I06246	BC040527	coiled-coil domain containing 100
1554794_a_at	1.13316	1.31228	1.41245	1.29711	KIAA10; KIAA0010	BC014029	ubiquitin protein ligase E3C
1554807_a_at	1.00083	1.31862	1.53297	1.44143	Spir-1; MGC150621; MGC150622	BC016825	spire homolog 1 (Drosophila)
1554726_at	0.836628	1.28593	0.871521	1.49318	VIK; VIK-1; MGC5521; FLJ23461; MGC10859; MGC16203; DKFZp686M1631	AY099353	zinc finger protein 655
1554747_a_at	1.08215	1.26681	1.52431	1.55044	DIFF6; NEDD5; Pnutl3; hNedd5; KIAA0158	BC033559	septin 2
1554478_a_at	1.14892	1.3012	1.53553	1.0563	FLJ20718	BC033077	HEAT repeat containing 3
1554509_a_at	1.13615	1.14357	1.567	1.36199	CARP; DERP5; my042; MST126; MSTP126; FLJ13397; RP11-394I23.1	BC020605	chromosome 10 open reading frame 97
1554489_a_at	1.00577	0.960178	0.65429	0.930545	BITE; FLJ13036	BC016050	centrosomal protein 70kDa
1554472_a_at	1.05729	0.95019	0.495245	0.805807	CGI-72; MGC64923	BC015211	PHD finger protein 20-like 1
200887_s_at	1.20557	1.128	1.40225	1.47203	ISGF-3; STAT91; DKFZp686B04100	NM_007315	signal transducer and activator of transcription 1, 91kDa
200878_at	1.04923	1.15841	1.58292	1.90117	HLF; MOP2; HIF2A; PASD2	AF052094	endothelial PAS domain protein 1
200914_x_at	0.945807	0.806597	0.421902	0.802278	KTN1	BF589024	Kinectin 1 (kinesin receptor)
200915_x_at	0.890707	0.832598	0.515446	0.854614	CG1; KNT; KIAA0004; MGC133337; MU-RMS-40.19	NM_004986	kinectin 1 (kinesin receptor)
200900_s_at	1.01577	1.18928	1.41436	1.26116	M6PR	AI583537	Mannose-6-phosphate receptor (cation dependent)
200831_s_at	1.06641	1.44362	1.7636	1.47638	SCD	AA678241	Stearoyl-CoA desaturase (delta-9-desaturase)
200841_s_at	1.28238	1.54476	1.50612	1.53672	EPRS	AI142677	Glutamyl-prolyl-tRNA synthetase
200848_at	1.11136	1.14727	1.42573	1.3887	AHCYL1	AA479488	S-adenosylhomocysteine hydrolase-like 1
200844_s_at	1.11987	1.23264	1.52674	1.27159	PRDX6	BE869583	Peroxiredoxin 6
201003_x_at	0.997696	1.15447	1.49744	1.52985	Kua-UEV; UBE2V1; CROC-1B	NM_003349	ubiquitin-conjugating enzyme E2 variant 1
201035_s_at	1.00527	1.08363	1.67847	1.46372	HAD; HHF4; HADH1; SCHAD; HADHSC; M/SCHAD; MGC8392	BC000306	hydroxyacyl-Coenzyme A dehydrogenase
201018_at	0.958355	0.7869	0.605738	0.701936	EIF1A; EIF4C; eIF-1A; eIF-4C	AL079283	eukaryotic translation initiation factor 1A, X-linked
201027_s_at	0.914249	0.751235	0.569691	0.709115	IF2; FLJ10524; KIAA0741; DKFZp434I036	NM_015904	eukaryotic translation initiation factor 5B
201024_x_at	0.914314	0.871175	0.650374	0.698648	EIF5B	BG261322	602373079F1 NIH_MGC_93 Homo sapiens cDNA clone IMAGE:4484563 5', mRNA sequence.
201025_at	0.829905	0.751789	0.555082	0.653515	IF2; FLJ10524; KIAA0741; DKFZp434I036	AB018284	eukaryotic translation initiation factor 5B
200946_x_at	1.05865	1.33559	1.74339	1.48568	GLUD1	AI339331	Glutamate dehydrogenase 1
200947_s_at	1.0416	1.19629	1.48665	1.27353	GDH; GLUD; MGC132003	NM_005271	glutamate dehydrogenase 1
200942_s_at	1.15193	1.32555	1.4944	1.3495	NPC-A-13; DKFZp686D1664; DKFZp686O24200	NM_001537	heat shock factor binding protein 1
200676_s_at	1.10712	1.62294	1.64092	1.3679	E2-F1; L-UBC; UBCH7; UbcM4	NM_003347	ubiquitin-conjugating enzyme E2L 3
200648_s_at	1.07622	1.36157	1.65972	1.75465	GS; GLNS; PIG43	NM_002065	glutamate-ammonia ligase (glutamine synthetase)
200660_at	0.985206	1.08725	1.26784	1.59403	MLN70; S100C	NM_005620	S100 calcium binding protein A11
200696_s_at	1.0305	1.11911	1.43344	1.6631	DKFZp313L0718	NM_000177	gelsolin (amyloidosis, Finnish type)
200701_at	1.03781	1.17168	1.56547	1.68667	HE1; NP-C2; MGC1333	NM_006432	Niemann-Pick disease, type C2
200612_s_at	1.12401	1.0593	1.56804	1.34602	ADTB2; AP105B; CLAPB1; AP2-BETA; DKFZp781K0743	NM_001282	adaptor-related protein complex 2, beta 1 subunit
200609_s_at	1.11925	1.23585	1.72468	1.45989	AIP1; NORI-1	NM_017491	WD repeat domain 1
200604_s_at	1.19777	1.47731	1.43314	1.7262	CAR; CNC; CNC1; PKR1; TSE1; PPNAD1; PRKAR1; MGC17251; DKFZp779L0468	M18468	protein kinase, cAMP-dependent, regulatory, type I, alpha (tissue specific extinguisher 1)
200637_s_at	1.08258	1.25363	1.36968	1.55303	PTPRF	AI762627	Protein tyrosine phosphatase, receptor type, F
200771_at	1.08977	1.22644	1.73449	1.64876	LAMB2; MGC87297	NM_002293	laminin, gamma 1 (formerly LAMB2)
200778_s_at	1.02249	1.1813	1.48449	1.32623	2002-09-01	AI191427	Septin 2
200762_at	1.06271	1.25023	1.41486	1.50351	DRP2; CRMP2; DRP-2; DHPRP2	NM_001386	dihydropyrimidinase-like 2
200802_at	1.06327	1.20708	1.52682	1.38899	SERS; SERRS; FLJ36399	NM_006513	seryl-tRNA synthetase
200789_at	0.932174	1.36547	1.5286	1.60011	HPXEL	NM_001398	enoyl Coenzyme A hydratase 1, peroxisomal
200800_s_at	0.872009	0.837388	0.879454	0.574011	HSP72; HSPA1; HSPA1B; HSP70-1	NM_005345	heat shock 70kDa protein 1A
200727_s_at	1.11398	1.37022	1.46446	1.41142	ACTR2	AA699583	ARP2 actin-related protein 2 homolog (yeast)
200706_s_at	1.01688	1.14347	1.20629	1.52832	PIG7; CMT1C; SIMPLE; TP53I7; FLJ38636; MGC116698; MGC116700; MGC116701; MGC125274; MGC125275; MGC125276	NM_004862	lipopolysaccharide-induced TNF factor
200704_at	0.995677	1.192	1.43365	1.56166	PIG7; CMT1C; SIMPLE; TP53I7; FLJ38636; MGC116698; MGC116700; MGC116701; MGC125274; MGC125275; MGC125276	AB034747	lipopolysaccharide-induced TNF factor
200734_s_at	0.961701	1.24174	1.63771	1.09639	ARF3	BG341906	ADP-ribosylation factor 3
200736_s_at	1.03074	1.25687	1.69551	1.8293	GSHPX1; MGC14399; MGC88245	NM_000581	glutathione peroxidase 1
201337_s_at	1.01517	0.9941	1.71336	1.57786	CEB	NM_004781	vesicle-associated membrane protein 3 (cellubrevin)
201340_s_at	1.32621	1.58084	1.91725	2.39384	NRPB; CCL28; ENC-1; PIG10; KLHL35; TP53I10; FLJ39259	AF010314	ectodermal-neural cortex (with BTB-like domain)
201341_at	1.51218	2.06927	2.60194	2.82416	NRPB; CCL28; ENC-1; PIG10; KLHL35; TP53I10; FLJ39259	NM_003633	ectodermal-neural cortex (with BTB-like domain)
201392_s_at	1.08323	1.21743	1.56374	1.48186	IGF2R	BG031974	Insulin-like growth factor 2 receptor
201393_s_at	1.21336	1.20818	1.33065	1.55639	MPRI; CD222; CIMPR; M6P-R	NM_000876	insulin-like growth factor 2 receptor
201301_s_at	0.936816	1.21727	1.49719	1.467	ANX4; PIG28; MGC75105; DKFZp686H02120	BC000182	annexin A4
201286_at	1.02277	1.33758	1.51879	1.39306	SDC; CD138; SYND1; syndecan	Z48199	syndecan 1
201287_s_at	1.08198	1.11191	1.64972	1.3803	SDC; CD138; SYND1; syndecan	NM_002997	syndecan 1
201325_s_at	1.09215	1.52626	1.46218	1.6378	TMP; CL-20; EMP-1	NM_001423	epithelial membrane protein 1
201310_s_at	1.11294	1.1897	1.44913	1.48268	P311; PTZ17; D4S114; PRO1873	NM_004772	chromosome 5 open reading frame 13
201308_s_at	0.894736	1.02097	0.867384	1.48346	2011-09-01	NM_018243	septin 11
201467_s_at	1.24047	1.42883	1.63576	1.56519	NQO1	AI039874	NAD(P)H dehydrogenase, quinone 1
201450_s_at	0.860538	0.871954	0.628559	0.719851	TIA1	NM_022037	TIA1 cytotoxic granule-associated RNA binding protein
201505_at	1.11543	1.12089	1.35571	1.65312	CLM; MGC142015	NM_002291	laminin, beta 1
201437_s_at	1.00183	0.811241	0.663178	0.661936	CBP; EIF4F; EIF4E1; EIF4EL1; MGC111573	NM_001968	eukaryotic translation initiation factor 4E
201428_at	1.13114	1.08369	1.75282	1.67764	CPER; CPE-R; CPETR; CPETR1; WBSCR8; hCPE-R	NM_001305	claudin 4
201120_s_at	0.948674	1.18227	1.42401	1.13001	PGRMC1	AL547946	Progesterone receptor membrane component 1
201106_at	1.0433	1.20948	1.55003	1.40138	MCSP; PHGPx; snGPx; snPHGPx	NM_002085	glutathione peroxidase 4 (phospholipid hydroperoxidase)
201152_s_at	0.969878	0.801978	0.634392	0.649482	MBNL1	N31913	Muscleblind-like (Drosophila)
201161_s_at	1.02031	1.18361	1.3625	1.4798	DBPA; CSDA1; ZONAB	NM_003651	cold shock domain protein A
201131_s_at	1.16426	1.30281	1.43246	1.80928	UVO; CDHE; ECAD; LCAM; Arc-1; CD324	NM_004360	cadherin 1, type 1, E-cadherin (epithelial)
201060_x_at	1.06201	1.22248	1.17545	1.52146	STOM	AI537887	tp32g06.x1 NCI_CGAP_Ut4 Homo sapiens cDNA clone IMAGE:2189530 3' similar to gb:M81635 ERYTHROCYTE BAND 7 INTEGRAL MEMBRANE PROTEIN (HUMAN);, mRNA sequence.
201056_at	0.871898	0.771696	0.593469	1.02954	GOLGB1	N53479	Golgi autoantigen, golgin subfamily b, macrogolgin (with transmembrane signal), 1
201083_s_at	0.944221	0.751635	0.409392	0.515606	BCLAF1	AA740754	BCL2-associated transcription factor 1
201084_s_at	0.937803	0.880472	0.601157	0.703852	BTF; KIAA0164; bK211L9.1	NM_014739	BCL2-associated transcription factor 1
201275_at	0.960654	1.12587	1.46352	1.15349	FPS	NM_002004	farnesyl diphosphate synthase (farnesyl pyrophosphate synthetase, dimethylallyltranstransferase, geranyltranstransferase)
201188_s_at	1.01928	1.68508	1.89566	2.02099	IP3R3; FLJ36205	D26351	inositol 1,4,5-triphosphate receptor, type 3
201170_s_at	1.07356	1.30862	1.52255	1.85388	DEC1; STRA13; Stra14; SHARP-2	NM_003670	basic helix-loop-helix domain containing, class B, 2
201207_at	1.06286	1.27727	1.52757	1.40108	B12; B61; EDP1; MGC2317	NM_021137	tumor necrosis factor, alpha-induced protein 1 (endothelial)
1564362_x_at	1.05287	0.655382	0.53272	0.625015	MGC46336	AK096248	hypothetical protein MGC46336
1564166_s_at	1.00945	1.51086	1.47605	1.38152	PRKRIP1	AK098276	PRKR interacting protein 1 (IL11 inducible)
1564467_at	1.07665	1.05835	0.922095	1.46613	FLJ13305	AK091575	Hypothetical protein FLJ13305
1564494_s_at	1.17415	1.25252	1.49866	1.41527	DSI; GIT; PDI; PHDB; PDIA1; PO4DB; PO4HB; PROHB; ERBA2L	AK075503	procollagen-proline, 2-oxoglutarate 4-dioxygenase (proline 4-hydroxylase), beta polypeptide
1563431_x_at	0.951688	0.818727	0.596188	0.633851	CALM3	AA807959	Calmodulin 3 (phosphorylase kinase, delta)
1565951_s_at	1.02461	1.09681	0.623156	0.934794	CHML	AJ293392	Choroideremia-like (Rab escort protein 2)
1566472_s_at	1.00501	1.07708	1.57621	1.49617	LOC647305	AK098125	Similar to all-trans-13,14-dihydroretinol saturase
1565651_at	0.970197	1.06658	1.3966	1.03326	ARF1	BI868311	ADP-ribosylation factor 1
1565868_at	0.662315	0.818941	0.506562	0.693248		W96225	Transcribed locus
1565717_s_at	1.06802	1.35554	2.08275	1.82206	FUS	BE930017	CM3-GN0053-180800-293-g10 GN0053 Homo sapiens cDNA, mRNA sequence.
1561180_at	1.16242	1.65097	1.50291	1.78449	LRP11	AK021807	CDNA FLJ11745 fis, clone HEMBA1005526
1561167_at	0.72204	1.01505	0.589059	0.762506	GRB2	AF147300	Full length insert cDNA clone YA75A09
1561691_at	1.10988	0.990495	1.21719	1.51482	LOC285735; MGC126751; MGC126753	BC039371	hypothetical protein LOC285735
1560792_at	1.1222	1.10236	1.4147	1.58294	IER5	BU678407	CDNA FLJ37191 fis, clone BRALZ2003453
1560814_a_at	0.956197	0.754832	0.635837	0.929392		AK098781	unnamed protein product; Homo sapiens cDNA FLJ25915 fis, clone CBR04830.
1560754_at	1.19405	1.52664	1.40875	1.41739	CKLFSF7; FLJ30992	AL832450	CKLF-like MARVEL transmembrane domain containing 7
1560625_s_at	0.918103	0.859638	0.619481	0.516772	MGC50811	BC038211	Homo sapiens, clone IMAGE:5398574, mRNA
1561135_at	1.03092	0.845591	0.68895	0.592674	UBL5	AF085980	Full length insert cDNA clone YT88G03
1562792_at	0.898829	0.931881	0.538351	0.795613	LOC643464	BC041434	Hypothetical LOC643464
1563259_at	1.02986	0.981286	0.593271	1.16481	FLJ11151	AK024838	CDNA: FLJ21185 fis, clone CAS11646
1562226_at	0.916683	1.041	0.617193	1.26355	FLJ14712	AK075525	hypothetical protein FLJ14712
1570185_at	0.970701	0.944778	0.57151	0.726157		BC039552	Homo sapiens, clone IMAGE:5766850, mRNA
1570061_at	0.895588	0.663729	0.95427	0.750831	RAB7	BC014200	CDNA clone IMAGE:4555030
1570523_s_at	1.15919	1.34767	1.57228	1.46978	APG10; APG10L; pp12616; FLJ13954; DKFZP586I0418	AF318326	ATG10 autophagy related 10 homolog (S. cerevisiae)
1570552_at	0.891413	0.790206	0.593214	0.97208	LSCCR-1	AF363068	chromosome 18 open reading frame 50
1569594_a_at	0.785961	0.831274	0.550021	0.74713	NY-CO-1; FLJ10051	BC006001	serologically defined colon cancer antigen 1
1569566_at	1.19313	1.81534	1.76625	1.36859	TBC; TBC1; KIAA1108	BC028196	TBC1 (tre-2/USP6, BUB2, cdc16) domain family, member 1
1569872_a_at	1.20406	1.19832	1.51302	1.6158	LOC650392	BC036550	Hypothetical protein LOC650392
1568596_a_at	0.886154	0.802585	0.643681	0.587025	TROAP	AI199355	Trophinin associated protein (tastin)
1568857_a_at	1.10437	1.20718	1.31144	1.45347	NBR1	BC012591	Neighbor of BRCA1 gene 1
1568780_at	1.11855	1.34754	1.34696	1.55671	LOC497257	BC030211	Hypothetical LOC497257
1566887_x_at	0.830385	0.713914	0.464296	0.455925		AY094612	Multiple myeloma susceptibility mRNA sequence
1566785_x_at	0.936554	0.768651	0.628702	0.534111	LOC728806	AK025172	Similar to N-ethylmaleimide-sensitive factor
1569311_at	0.85781	0.900333	0.505925	0.615158	LOC554203	BC038589	Hypothetical LOC554203
1569369_at	1.0322	1.27917	1.65687	1.38787	ZFYVE28	BC035793	Zinc finger, FYVE domain containing 28
1568951_at	0.998821	0.729408	0.592815	0.654751	FLJ20086	AL530743	AL530743 Homo sapiens NEUROBLASTOMA COT 50-NORMALIZED Homo sapiens cDNA clone CS0DD008YF20 3-PRIME, mRNA sequence.
213929_at	0.89649	0.680544	0.590111	0.797276	GPIAP1	AL050204	CDNA clone IMAGE:4733238
213954_at	0.992347	0.794003	0.511591	0.844516	KIAA0888	AB020695	KIAA0888 protein
213956_at	0.921549	0.785539	0.60066	0.747524	CEP350	AW299294	Centrosomal protein 350kDa
213946_s_at	1.06352	1.02708	0.983351	0.62779	OBSL1	AI633851	Obscurin-like 1
213931_at	1.04118	0.997439	0.730101	1.39294	ID2	AI819238	Inhibitor of DNA binding 2, dominant negative helix-loop-helix protein
213945_s_at	0.995169	1.21625	1.72349	1.18776	NUP210	AA909765	Nucleoporin 210kDa
213850_s_at	0.954004	0.712977	0.433181	0.850074	SFRS2IP	AI984932	Splicing factor, arginine/serine-rich 2, interacting protein
214101_s_at	0.940984	0.756682	0.645093	0.847615	NPEPPS	BG153399	Aminopeptidase puromycin sensitive
214003_x_at	1.07166	1.37912	1.53807	1.27264	RPS20	BF184532	Ribosomal protein S20
213986_s_at	1.18377	1.29454	1.92067	1.66079	C19orf6	AI805266	Chromosome 19 open reading frame 6
213989_x_at	0.912515	0.651679	1.0064	0.871908	C21orf18; C21orf27	AB004853	SET domain containing 4
214030_at	0.89407	0.734447	0.551312	0.692275	DKFZp667G2110	BE501352	Hypothetical protein DKFZp667G2110
213590_at	1.23945	1.39168	1.86244	1.78358	SLC16A5	AA705628	Solute carrier family 16, member 5 (monocarboxylic acid transporter 6)
213642_at	0.986832	1.17535	1.49429	0.929624	RPL27	BE312027	Transcribed locus, strongly similar to XP_001112771.1 similar to ribosomal protein L27 isoform 3 [Macaca mulatta]
213617_s_at	1.17054	1.24105	1.61966	1.51793	C18orf10	BF063896	Chromosome 18 open reading frame 10
213623_at	1.00147	0.954662	0.627123	0.910315	KIF3A	NM_007054	kinesin family member 3A
213520_at	1.08012	1.32916	1.43259	1.28745	RTS; RECQ4	NM_004260	RecQ protein-like 4
213562_s_at	1.29238	1.5229	1.5186	1.65065	SQLE	BF979497	Squalene epoxidase
213558_at	0.887118	0.568892	0.57899	0.745572	ACZ; DKFZp779G1236	AB011131	piccolo (presynaptic cytomatrix protein)
213572_s_at	0.986441	1.11966	1.35806	1.61661	SERPINB1	AI554300	Serpin peptidase inhibitor, clade B (ovalbumin), member 1
213548_s_at	1.24685	1.43113	1.74364	1.60868	CDV3	BG257762	CDV3 homolog (mouse)
213555_at	1.03496	1.036	1.60114	1.42261	RWDD2	AL049699
213750_at	0.952371	1.20949	1.53714	1.49591	RSL1D1	AA928506	Ribosomal L1 domain containing 1
213725_x_at	0.942426	1.20621	1.11579	1.44227	XYLT1	AI693140	Xylosyltransferase I
213737_x_at	1.03251	1.24949	1.27933	1.64685	DKFZp434P162	AI620911	Transcribed locus
213792_s_at	1.02711	1.14158	1.70331	1.38116	INSR	AA485908	Transcribed locus
213779_at	1.10944	1.09868	1.59272	1.52518	EMID1	AL031186
213666_at	0.977528	1.23878	1.07194	1.5879	SEP2; SEPT2; KIAA0128; MGC16619; MGC20339; RP5-876A24.2	AK026589	septin 6
213677_s_at	0.925297	0.934657	0.655264	1.05046	PMS1	BG434893	PMS1 postmeiotic segregation increased 1 (S. cerevisiae)
213653_at	1.03846	1.45676	1.43854	1.57634	METTL3	AW069290	Methyltransferase like 3
213701_at	0.920692	0.858605	0.647326	0.749772	C12orf29	AW299245	Chromosome 12 open reading frame 29
213716_s_at	1.35714	1.25917	1.4508	1.29056	SECTM1	BF939675	Secreted and transmembrane 1
213718_at	0.933405	0.739662	0.901026	0.604273	RBM4	BE222257	RNA binding motif protein 4
213689_x_at	1.16987	1.19361	1.4282	1.49508	RPL5	AL137958	Ribosomal protein L5
214751_at	0.866638	0.719608	0.627397	0.808933	ZNF468	BE541042	Zinc finger protein 468
214727_at	0.79927	0.789521	0.409103	1.07838	FAD; FACD; FAD1; BRCC2; FANCB; FANCD; FANCD1	X95152	breast cancer 2, early onset
214723_x_at	0.826393	0.797175	0.542239	0.785781	FLJ21281; FLJ90089; MGC149864; MGC149865	AB046861	KIAA1641
214785_at	0.788014	0.804202	0.383034	0.885156	CHAC; FLJ42030; KIAA0986	AB023203	vacuolar protein sorting 13 homolog A (S. cerevisiae)
214658_at	0.972113	0.850806	0.647301	0.746652	TICAM2	BG286537	Toll-like receptor adaptor molecule 2
214709_s_at	0.886884	0.822804	0.509064	0.817579	CG1; KNT; KIAA0004; MGC133337; MU-RMS-40.19	Z22551	kinectin 1 (kinesin receptor)
214690_at	0.940081	0.814293	0.618958	0.663347	TAF1B	AA004579	TATA box binding protein (TBP)-associated factor, RNA polymerase I, B, 63kDa
214700_x_at	0.76664	0.785823	0.379897	0.735726	FLJ12870; DKFZp781N1478	AK000323	RAP1 interacting factor homolog (yeast)
214889_at	0.998907	1.27118	1.32884	1.63904	DKFZP564J102; MST119; MSTP119	AL080065	DKFZP564J102 protein
214890_s_at	1.06334	1.62071	2.26675	2.23688	DKFZP564J102; MST119; MSTP119	AL080065	DKFZP564J102 protein
214895_s_at	1.02676	1.36035	1.25365	1.73101	ADAM10	AU135154	ADAM metallopeptidase domain 10
214820_at	0.979811	0.808782	0.580449	0.91343	N143; WDR9; FLJ43918; C21orf107	AJ002572	bromodomain and WD repeat domain containing 1
214828_s_at	1.05131	1.36322	1.44636	1.64366	dJ222E13.2	AL157851	similar to CGI-96
214830_at	0.806856	0.762574	0.537217	0.580837	SLC38A6	AI537540	Solute carrier family 38, member 6
214881_s_at	0.880797	0.864336	0.950549	0.628141	UBF; NOR-90	X56687	upstream binding transcription factor, RNA polymerase I
214297_at	0.991127	1.24689	1.66094	1.44147	CSPG4	BE857703	Chondroitin sulfate proteoglycan 4
214277_at	0.903634	0.747292	0.855883	0.533263	COX11	AI376724	COX11 homolog, cytochrome c oxidase assembly protein (yeast)
214321_at	1.2952	1.98629	1.47278	2.26529	NOV	BF440025	Nephroblastoma overexpressed gene
214185_at	1.06142	1.49775	1.25259	1.50751	KHDRBS1	AW592227	KH domain containing, RNA binding, signal transduction associated 1
214202_at	1.03977	0.877589	0.515827	0.834838		N21364	MRNA from chromosome 5q21-22, clone:357Ex
214259_s_at	1.05064	1.18818	1.57022	1.38604	AKR7A2	AI144075	Aldo-keto reductase family 7, member A2 (aflatoxin aldehyde reductase)
214499_s_at	0.96662	0.849762	0.640841	0.740462	BTF; KIAA0164; bK211L9.1	AF249273	BCL2-associated transcription factor 1
214500_at	1.04698	1.20135	1.53266	1.64326	H2A.y; H2A/y; H2AFJ; mH2A1; H2AF12M; MACROH2A1.1; macroH2A1.2	AF044286	H2A histone family, member Y
214505_s_at	1.04597	1.13546	1.51414	1.77537	FHL1B; KYO-T; SLIM1; MGC111107; bA535K18.1	AF220153	four and a half LIM domains 1
214617_at	1.09518	1.21835	1.54987	1.5367	PRF1	AI445650	tj08g03.x1 NCI_CGAP_Gas4 Homo sapiens cDNA clone IMAGE:2140948 3' similar to contains MER30.t3 MER30 repetitive element ;, mRNA sequence.
214600_at	0.905218	0.611908	0.549698	0.685457	TEAD1	AW771935	TEA domain family member 1 (SV40 transcriptional enhancer factor)
214426_x_at	1.08879	1.28102	1.5384	1.2668	CHAF1A	BF062223	Chromatin assembly factor 1, subunit A (p150)
214434_at	1.03	1.17552	1.58245	1.65651	FLJ13874; KIAA0417	AB007877	heat shock 70kDa protein 12A
214474_at	0.932614	1.03514	0.950662	1.64014	MGC61468	NM_005399	protein kinase, AMP-activated, beta 2 non-catalytic subunit
214444_s_at	1.13266	1.48734	1.56796	1.49879	PVS; HVED; CD155; NECL5; TAGE4; Necl-5	NM_006505	poliovirus receptor
212794_s_at	0.919923	0.832369	0.565043	0.840668	KIAA1033	AK001728	KIAA1033
212795_at	1.02916	0.923504	0.544062	0.833281	KIAA1033	AL137753	KIAA1033
212800_at	1.04789	1.27945	1.26703	1.61135	STX6	AI740832	Syntaxin 6
212807_s_at	1.14496	1.10625	1.34437	1.43426	SORT1	BF447105	Sortilin 1
212817_at	1.13182	0.754768	1.50003	1.19341	Hsc40; KIAA1045	AK023253	DnaJ (Hsp40) homolog, subfamily B, member 5
212735_at	1.05559	1.0067	1.60126	1.14542	KIAA0226	BF448041	KIAA0226
212762_s_at	0.940572	0.755927	0.616101	0.65444	TCF7L2	AI375916	Transcription factor 7-like 2 (T-cell specific, HMG-box)
212917_x_at	0.970082	1.03409	0.551691	0.752588	RECQL	AI814728	wk66h11.x1 NCI_CGAP_Pan1 Homo sapiens cDNA clone IMAGE:2420421 3' similar to contains MER30.t1 MER30 repetitive element ;, mRNA sequence.
212918_at	0.961353	1.05856	0.59605	0.943412	RECQL	AI962943	RecQ protein-like (DNA helicase Q1-like)
212956_at	0.982054	1.20795	1.4436	1.54206	TBC1D9	AI348094	TBC1 domain family, member 9 (with GRAM domain)
212926_at	0.892415	0.683072	0.447448	0.742756	SMC5	AW183677	Structural maintenance of chromosomes 5
212853_at	1.27977	1.41314	1.18029	1.65654	DCUN1D4	AA779297	DCN1, defective in cullin neddylation 1, domain containing 4 (S. cerevisiae)
212852_s_at	0.938947	0.8885	0.621853	0.798306	TROVE2	AL538601	TROVE domain family, member 2
212848_s_at	0.975306	1.1297	1.52784	1.17477	C9orf3	BG036668	Chromosome 9 open reading frame 3
212845_at	1.05955	1.31256	1.56957	1.72543	SMG; SMGA; SAMD4; Smaug; Smaug1; KIAA1053; DKFZp434H0350	AB028976	sterile alpha motif domain containing 4A
212873_at	0.985699	1.24999	1.39094	1.27062	HMHA1	BE349017	Histocompatibility (minor) HA-1
212543_at	1.01953	1.1182	1.45286	1.55801	ST4	U83115	absent in melanoma 1
212556_at	1.02965	1.13599	1.40132	1.05075	SCRIB	AI469403	Scribbled homolog (Drosophila)
212576_at	1.12481	1.14784	1.58609	1.22258	RNF156; KIAA0544	AB011116	mahogunin, ring finger 1
212585_at	0.912845	0.764012	0.493068	0.756036	OSBPL8	BF970829	Oxysterol binding protein-like 8
212542_s_at	0.775207	0.711095	0.339767	0.647651	PHIP	BF224151	Pleckstrin homology domain interacting protein
212569_at	0.947635	0.780836	0.5778	0.669475	SMCHD1	AV699744	Structural maintenance of chromosomes flexible hinge domain containing 1
212496_s_at	0.894881	1.11599	1.33893	1.46065	JMJD2B	BE256900	Jumonji domain containing 2B
212475_at	1.15038	1.60797	1.71866	1.42924	KIAA0241	AI797458	KIAA0241
212480_at	1.12463	1.24508	1.45785	1.1411	KIAA0376	AB002374	SPECC1-like
212481_s_at	1.10396	1.38467	1.54833	1.46212	TPM4	AI214061	Tropomyosin 4
212476_at	0.98192	0.907019	0.645757	0.842934	ACAP2; CNT-B2; KIAA0041	D26069	centaurin, beta 2
212651_at	1.11485	1.1508	1.33446	1.53985	KIAA0740; MGC33059; MGC33841	AB018283	Rho-related BTB domain containing 1
212616_at	1.03161	0.983187	0.484014	0.919643	CHD9	BF668950	Chromodomain helicase DNA binding protein 9
212613_at	1.1661	1.19654	1.56934	1.38652	BTN3A2	AI991252	Butyrophilin, subfamily 3, member A2
212615_at	0.975835	0.907583	0.416403	0.904191	CHD9	AI742305	Chromodomain helicase DNA binding protein 9
212619_at	1.12716	1.52034	1.65214	1.61498	KIAA0286	AW205215	KIAA0286 protein
212593_s_at	0.936793	1.23611	1.71793	2.11353	PDCD4	N92498	Programmed cell death 4 (neoplastic transformation inhibitor)
212601_at	1.07275	1.17969	1.42801	1.01256	ZZZ4; FLJ10821; FLJ45574; KIAA0399	AB007859	zinc finger, ZZ-type with EF-hand domain 1
212633_at	0.990052	0.813552	0.469504	0.63656	KIAA0776	AL132776	Human DNA sequence from clone RP3-393D12 on chromosome 6q16.1-16.3, complete sequence.
212634_at	1.0289	0.961718	0.571659	0.90075	KIAA0776	AW298092	KIAA0776
212635_at	0.994292	0.869466	0.595067	0.809777	TNPO1	AW161626	Transportin 1
212621_at	1.07004	1.44492	1.46946	1.52884	KIAA0286; DKFZp686N1768	AB006624	KIAA0286 protein
212629_s_at	0.99515	0.821869	0.641971	0.842434	PKN2	AI633689	Protein kinase N2
213325_at	0.975649	0.729904	0.573307	0.58458	PVRL3	AA129716	Poliovirus receptor-related 3
213350_at	1.02772	1.08874	1.56408	1.31421	RPS11	BF680255	Ribosomal protein S11
213358_at	1.06423	1.06565	1.40499	1.59331	KIAA0802	AB018345	KIAA0802
213328_at	1.01721	0.954635	0.645286	0.884279	NEK1	AI936517	NIMA (never in mitosis gene a)-related kinase 1
213329_at	1.02726	1.1675	1.54664	1.3245	SRGAP2	AA742261	SLIT-ROBO Rho GTPase activating protein 2
213239_at	0.825335	0.885114	0.529215	0.807323	PIBF1; KIAA1008; RP11-505F3.1	NM_006346	chromosome 13 open reading frame 24
213253_at	0.951177	0.747721	0.486	0.797144	SMC2	AU154486	Structural maintenance of chromosomes 2
213225_at	0.961588	0.798927	0.612448	0.701111	PP2CB; MGC21657; PP2CBETA; PPC2BETAX; PP2C-beta-X	AJ271832	protein phosphatase 1B (formerly 2C), magnesium-dependent, beta isoform
213262_at	1.09547	0.860811	0.459384	0.76872	SACS	AI932370	Spastic ataxia of Charlevoix-Saguenay (sacsin)
213263_s_at	1.41673	0.745597	1.20994	0.907966	PCBP2	AW025150	Poly(rC) binding protein 2
213268_at	1.09343	1.61842	1.6805	1.64165	CAMTA1	Z98884
213502_x_at	1.06997	1.42439	2.24947	1.56908	LOC91316	AA398569	Similar to bK246H3.1 (immunoglobulin lambda-like polypeptide 1, pre-B-cell specific)
213471_at	0.923604	1.40469	1.64856	1.70483	SLSN4; KIAA0673	AB014573	nephronophthisis 4
213469_at	0.787771	1.00847	0.613991	0.916017	PGAP1	AV705244	GPI deacylase
213470_s_at	1.05379	1.49864	1.88481	1.31424	HNRPH1	BF983406	Heterogeneous nuclear ribonucleoprotein H1 (H)
213364_s_at	0.960769	1.11916	1.05725	1.42656	SNX1	AI052536	Sorting nexin 1
213359_at	1.13029	1.60373	1.54567	1.90985	HNRPD	W74620	Heterogeneous nuclear ribonucleoprotein D (AU-rich element RNA binding protein 1, 37kDa)
213419_at	1.04576	1.00539	1.23688	1.47765	hFE65L	U62325	similar to rat FE65 protein, GenBank Accession Number X60469; contains one WW domain and two phosphotyrosine interaction (PI) domains.; Human FE65-like protein (hFE65L) mRNA, partial cds.
213421_x_at	1.15763	1.2043	1.54867	1.4764	PRSS3	AW007273	Protease, serine, 3 (mesotrypsin)
213393_at	1.13446	1.20558	1.18592	1.52072		AI767210	wi94d05.x1 NCI_CGAP_Kid12 Homo sapiens cDNA clone IMAGE:2400969 3', mRNA sequence.
213048_s_at	1.01945	1.22046	1.58221	1.17817	SET	W26593	SET translocation (myeloid leukemia-associated)
213044_at	0.912844	0.854603	0.608063	0.809832	ROCK1	N22548	Rho-associated, coiled-coil containing protein kinase 1
213050_at	1.13797	1.09446	1.57482	1.42422	COBL	AA594937	Cordon-bleu homolog (mouse)
213027_at	0.952888	0.874832	0.546256	0.757892	TROVE2	AU146655	TROVE domain family, member 2
213024_at	0.931248	0.745031	0.391497	0.755495	TMF1	BF593908	TATA element modulatory factor 1
213074_at	0.810552	0.628099	0.414023	0.665797	IRAK1BP1	BG545769	Full-length cDNA clone CS0DF025YM09 of Fetal brain of Homo sapiens (human)
213070_at	0.814802	0.767653	0.430133	0.640545	PIK3C2A	AV682436	Phosphoinositide-3-kinase, class 2, alpha polypeptide
212979_s_at	1.00591	1.11468	1.04344	1.49407	KIAA0738	AW293343	KIAA0738 gene product
212976_at	0.946594	0.829568	0.607115	0.764945	TA-LRRP	R41498	Transcribed locus
212984_at	0.979932	0.909848	0.581771	0.909661	ATF2	BE786164	Activating transcription factor 2
212632_at	1.06912	1.22322	1.27479	1.48444	STX7	N32035	Syntaxin 7
213012_at	0.931289	1.04002	0.581821	0.777383	KIAA0093	D42055	neural precursor cell expressed, developmentally down-regulated 4
213020_at	0.916698	0.704667	0.845832	0.633417	GOSR1	AI814252	Golgi SNAP receptor complex member 1
213000_at	1.0208	0.827133	0.592847	0.898444	NXP2; ZCW5; ZCWCC3	AP000693	MORC family CW-type zinc finger 3
213165_at	0.967205	0.867347	0.652888	0.838825	CEP350	AI041204	Centrosomal protein 350kDa
213152_s_at	1.04167	1.34041	1.55529	1.22036	SFRS2B	AI343248	Splicing factor, arginine/serine-rich 2B
213186_at	0.955995	0.822392	0.592684	0.777338	DZIP3	BG502305	Zinc finger DAZ interacting protein 3
213110_s_at	1.04219	1.15664	1.21991	1.60131	COL4A5	AW052179	Collagen, type IV, alpha 5 (Alport syndrome)
213134_x_at	1.04038	1.14498	1.32697	1.43274	BTG3	AI765445	BTG family, member 3
213140_s_at	1.15218	1.38807	1.55915	1.51109	CREST; LP2261; KIAA0693; MGC26711; MGC78386	AB014593	synovial sarcoma translocation gene on chromosome 18-like 1
213201_s_at	1.11649	1.26183	1.55015	1.40971	TNNT1	AJ011712
213119_at	1.02532	1.34868	1.69981	1.45055	SLC36A1	AW058600	Solute carrier family 36 (proton/amino acid symporter), member 1
217853_at	1.14825	1.26794	1.68635	1.66161	TEM6; TENS1; FLJ13732; FLJ35545; MGC88434; H_NH049I23.2; DKFZp686M1045; DKFZp686K12123	NM_022748	tensin 3
217951_s_at	0.910153	0.713844	0.335012	0.673259	PHF3	AW189430	PHD finger protein 3
217952_x_at	0.900749	0.854672	0.568198	0.776373	PHF3	BF430956	PHD finger protein 3
217954_s_at	0.916047	0.833911	0.577377	0.771287	KIAA0244; MGC142210; MGC142212	NM_015153	PHD finger protein 3
217935_s_at	1.06653	1.24168	1.48791	1.1916	BFZB; CBP3; MGC104353; MGC141902	NM_018244	chromosome 20 open reading frame 44
217936_at	1.08201	0.862042	0.431454	0.730161	ARHGAP5	AW044631	Rho GTPase activating protein 5
217880_at	1.01347	0.713855	0.631064	0.595002	CDC27	N21397	Full-length cDNA clone CS0DF026YC07 of Fetal brain of Homo sapiens (human)
217889_s_at	1.02124	1.07612	1.58589	1.75939	DCYTB; FRRS3; FLJ23462	NM_024843	cytochrome b reductase 1
217909_s_at	1.23368	1.27161	1.48834	1.36424	MLX	BF056105	MAX-like protein X
217914_at	1.1177	1.54493	1.54952	1.52304	TPC1; FLJ20612; KIAA1169	NM_017901	two pore segment channel 1
217448_s_at	1.21457	1.5126	1.40532	1.45593		AL117508	MRNA; cDNA DKFZp434G1835 (from clone DKFZp434G1835)
217478_s_at	1.19629	1.21955	1.55845	1.60606	HLA-DMA	X76775
217551_at	1.03254	1.23562	1.14179	1.61375	LOC441453	AA719797	Similar to olfactory receptor, family 7, subfamily A, member 17
217529_at	1.00768	0.953491	1.19667	1.70344	C7orf19	BE547674	601076255F1 NIH_MGC_12 Homo sapiens cDNA clone IMAGE:3462325 5', mRNA sequence.
217536_x_at	1.07413	1.16488	1.64099	1.50509		M78162	Transcribed locus
217336_at	1.00659	0.606003	0.789193	0.703783	RPS10	AL118510	dJ858M22.1 (RPS10 (40S ribosomal protein S10) pseudogene) match: proteins: Sw:O14112 Tr:O77302 Tr:O13614 Sw:Q07254 Sw:O77082 Sw:P09900 Tr:Q9Y0Y3 Sw:P46783; Human DNA sequence from clone RP5-858M22 on chromosome 20. Contains an RPS10 (40S ribosomal protein S10) pseudogene, STSs and GSSs, complete sequence.
217544_at	1.03981	1.71589	1.14632	1.49085	LOC729806	AA768909	Similar to Zinc finger protein 492
217728_at	0.922341	0.799708	1.06324	1.43671	2A9; PRA; 5B10; CABP; CACY	NM_014624	S100 calcium binding protein A6
217762_s_at	1.02487	1.07301	1.14619	1.51924	RAB31	BE789881	RAB31, member RAS oncogene family
217763_s_at	1.07639	1.0656	1.12817	1.50722	Rab22B	NM_006868	RAB31, member RAS oncogene family
217764_s_at	1.01596	1.22046	1.54528	1.51247	Rab22B	AF183421	RAB31, member RAS oncogene family
217625_x_at	0.919395	0.563286	0.633864	0.8804		AA102667	zn73e05.s1 Stratagene NT2 neuronal precursor 937230 Homo sapiens cDNA clone IMAGE:563840 3' similar to contains Alu repetitive element;contains element MSR1 repetitive element ;, mRNA sequence.
217594_at	1.11232	1.58161	1.06798	1.45471	ZCCHC11	R25849	yh42a11.r1 Soares placenta Nb2HP Homo sapiens cDNA clone IMAGE:132380 5', mRNA sequence.
218285_s_at	1.05693	1.46644	2.13363	2.11286	DHRS6; EFA6R; UCPA-OR; UNQ6308; FLJ13261; PRO20933	NM_020139	3-hydroxybutyrate dehydrogenase, type 2
218270_at	0.900122	0.755852	0.790549	0.611569	MGC9831; MRP-L18; FLJ20917; MGC22737	NM_024540	mitochondrial ribosomal protein L24
218210_at	1.05855	1.29768	1.51095	1.2525	FN3KRP; FLJ12171	NM_024619	fructosamine-3-kinase-related protein
218211_s_at	1.08963	1.19885	1.48532	1.50979	MGC2771; SLAC2-A; MGC59733	NM_024101	melanophilin
218402_s_at	1.00091	0.850436	0.864563	0.61503	LE; KIAA1667; bK1048E9.4; bK1048E9.5	NM_022081	Hermansky-Pudlak syndrome 4
218424_s_at	1.12551	1.45573	1.75651	1.27986	STMP3; TSAP6; dudlin-2	NM_018234	STEAP family member 3
218414_s_at	1.02053	0.739113	0.654534	0.974286	NUDE; NUDE1; FLJ20101; HOM-TES-87	NM_017668	nudE nuclear distribution gene E homolog 1 (A. nidulans)
218338_at	1.10418	1.40721	1.41168	1.57044	EDR1; HPH1; RAE28	NM_004426	polyhomeotic homolog 1 (Drosophila)
218362_s_at	0.873021	0.869569	0.630025	0.764589	RRP44; dis3p; FLJ10484; KIAA1008; MGC33035; bA555G22.1; RP11-342J4.3; DKFZp667L1817	NM_014953	DIS3 mitotic control homolog (S. cerevisiae)
218043_s_at	0.996105	0.949562	0.567565	0.766875	AZ2; NAP1; tilp; TILP(S)	NM_022461	5-azacytidine induced 2
218055_s_at	1.09965	1.17674	1.4787	1.40853	MSTP048; FLJ10904	NM_018268	WD repeat domain 41
218007_s_at	0.995842	1.21646	1.43417	1.45931	RPS27L	NM_015920	ribosomal protein S27-like
218013_x_at	1.1853	1.66608	1.88651	1.72406	DCTN4	NM_016221	dynactin 4 (p62)
217991_x_at	0.9333	0.635659	0.800137	0.793233	CSDP; SSDP; SSDP1; FLJ10355	NM_018070	single stranded DNA binding protein 3
218031_s_at	0.874096	0.972944	1.31608	1.5206	FOXN3	NM_018589	forkhead box N3; synonyms: CHES1, PRO1635, C14orf116; isoform 2 is encoded by transcript variant 2; checkpoint suppressor 1; Homo sapiens forkhead box N3 (FOXN3), transcript variant 2, mRNA.
218030_at	0.844171	0.632191	0.833124	0.725172	GIT1	NM_014030	G protein-coupled receptor kinase interactor 1
218017_s_at	1.02765	1.28947	1.32879	1.72298	FLJ32731	NM_025070
218175_at	1.01327	1.19401	1.56772	1.80458	FLJ22471	NM_025140	coiled-coil domain containing 92
218164_at	0.948458	1.21801	1.44061	1.60264	SSP411; Tisp78; FLJ21347; FLJ21969; MGC111032; DKFZp686H1839	NM_022827	spermatogenesis associated 20
218159_at	0.930989	0.765087	0.872321	0.635222	MGC2592; dJ1187M17.3	NM_023935	chromosome 20 open reading frame 116
218166_s_at	0.964004	0.680357	0.619878	0.810213	XAP8; p325; HBXAP; RSF-1	NM_016578	remodeling and spacing factor 1
218192_at	0.958959	1.06999	1.42976	1.53261	PiUS; IP6K2	NM_016291	inositol hexaphosphate kinase 2
215646_s_at	1.24363	1.12086	0.932614	1.87902	VCAN	R94644	Versican
215519_x_at	1.169	1.22835	1.52176	1.30704	RUTBC3	AI081779	RUN and TBC1 domain containing 3
215467_x_at	1.01814	0.781463	0.619626	0.700344	LOC647070	AK001442	Hypothetical LOC647070
215489_x_at	0.995166	1.29858	1.75493	1.49535	HOMER3	AI871287	Homer homolog 3 (Drosophila)
215882_at	1.04912	1.06525	0.618806	1.15829	CEP152	AK025247	Centrosomal protein 152kDa
215891_s_at	1.05105	1.68922	1.47375	1.78487	SAP-3	X61094	GM2 ganglioside activator
215936_s_at	1.06629	0.878389	0.53688	0.941455	KIAA1033	AK001657	KIAA1033
215948_x_at	0.884316	0.888947	0.797931	0.643664	ZMYM5	AI522311	Zinc finger, MYM-type 5
215913_s_at	0.921189	0.8184	0.476423	0.824376	CED6; GULP; CED-6; FLJ31156	AK023668	GULP, engulfment adaptor PTB domain containing 1
215555_at	1.01289	1.15855	1.10572	1.85283	C1orf63	AU158442	CDNA FLJ13712 fis, clone PLACE2000394
215794_x_at	1.06399	1.4562	1.94217	1.58939	GLUDP1	AC006144	glutamate dehydrogenase 2
215785_s_at	0.929371	1.14258	1.26488	1.68837	PIR121	AL161999	cytoplasmic FMR1 interacting protein 2
215095_at	0.929911	0.990762	0.366486	0.84728	ESD	AU145746	Esterase D/formylglutathione hydrolase
215177_s_at	0.919375	1.05926	1.28995	1.77002	ITGA6	AV733308	Integrin, alpha 6
215018_at	0.907098	0.85451	0.649814	0.600861	FLJ40913	AB051518	KIAA1731
215023_s_at	1.08059	1.40623	1.56491	1.53352	PEX1	AC000064
215016_x_at	0.904092	0.761807	0.435959	0.780357	BPA; DMH; BP240; BPAG1; MACF2; CATX-15; D6S1101; FLJ46791; KIAA0465; KIAA1470; DKFZp564B2416	BC004912	dystonin
215037_s_at	1.04936	1.32633	1.80899	1.41909	BCLX; BCL2L; Bcl-X; bcl-xL; bcl-xS; BCL-XL/S; DKFZp781P2092	U72398	BCL2-like 1
215073_s_at	0.738143	0.700732	0.502857	0.658884	NR2F2	AL554245	Nuclear receptor subfamily 2, group F, member 2
215054_at	1.26309	1.44737	1.78364	1.22395	EPOR	H16758	ym34e03.s1 Soares infant brain 1NIB Homo sapiens cDNA clone IMAGE:50015 3' similar to gb:M60459 ERYTHROPOIETIN RECEPTOR PRECURSOR (HUMAN);, mRNA sequence.
215043_s_at	1.23247	1.64363	1.3109	1.40052	SMA5	X83301	SMA5
215358_x_at	0.953068	1.18732	1.47232	1.37866	KOX21; FLJ23327	AK026980	zinc finger protein 37B
215436_at	1.08753	1.03979	1.38993	1.32236	HSDL2	AK023959	Hydroxysteroid dehydrogenase like 2
215434_x_at	1.01055	1.19262	1.44279	1.28142	LOC376745	AV684285	Transcribed locus
215407_s_at	1.02504	1.14333	1.58415	1.43438	KIAA0634; bA67K19.1	AK024064	astrotactin 2
215412_x_at	0.974663	0.852148	0.764344	0.651844	PMS4	AB017007	postmeiotic segregation increased 2-like 2
215239_x_at	0.980623	0.916311	0.617656	0.954615	ZNF273	AU132789	Zinc finger protein 273
215210_s_at	1.01038	1.12887	1.69767	1.21846	E2k	S72422	dihydrolipoamide S-succinyltransferase pseudogene (E2 component of 2-oxo-glutarate complex)
215068_s_at	1.14582	1.40801	1.60195	1.56939	Fbl18; FLJ11467; FLJ38075	BC004228	F-box and leucine-rich repeat protein 18
215222_x_at	0.945917	1.02409	1.22094	1.6105	ACF7; MACF; OFC4; ABP620; FLJ45612; FLJ46776; KIAA0465; KIAA1251	AK023406	microtubule-actin crosslinking factor 1
215287_at	1.02079	0.979092	0.478123	0.90983		AA975427	ELISC-1
215286_s_at	1.2046	1.66978	1.51844	1.87043	FLJ33324; MGC86999; DKFZP564F013	AL050389	putative homeodomain transcription factor 2
216915_s_at	1.09892	1.02071	1.59489	1.50221	PTPG1; PTP-PEST	S69182	protein tyrosine phosphatase, non-receptor type 12
216899_s_at	1.04246	1.27756	1.09033	1.70526	SCAP2	AC003999	Homo sapiens, SKAP55 homologue, clone MGC:10411 IMAGE:3940826, mRNA, complete cds.; H_DJ1139P01.1 This gene was based on gi(12804080 16753211) Continues from H_NH0232C20.1; Homo sapiens PAC clone RP5-1139P1 from 7, complete sequence.
216607_s_at	1.02379	1.22541	1.47849	1.54948	CYP51P2	U40053	cytochrome P450, subfamily 51 pseudogene 2
216713_at	0.915444	0.915768	0.439383	0.605493	CAM; CCM1	AL049325	KRIT1, ankyrin repeat containing
216591_s_at	1.04162	1.2737	1.80549	1.78149	CII-3	AF080579	integral membrane protein subunit of complex II; no evidence for translation; putative pseudogene; Homo sapiens integral membrane protein subunit of complex II (CII-3) pseudogene, complete sequence.
217142_at	0.849299	0.725127	0.523007	0.616918		AL035687	Human DNA sequence from clone RP1-142O9 on chromosome 6p11.1-12.3, complete sequence.
217149_x_at	0.975712	0.868632	1.02449	0.652552	MGC46193	AF097738	tyrosine kinase, non-receptor, 1
217289_s_at	1.13449	1.20433	1.75931	1.43273	G6PT1; G6PT2; G6PT3; GSD1b; GSD1c; GSD1d; TRG19; PRO0685; MGC15729	AF097831	solute carrier family 37 (glucose-6-phosphate transporter), member 4
217202_s_at	1.02672	1.25715	1.42735	1.72133	GLUL	U08626	Homo sapiens glutamine synthetase pseudogene, complete sequence.
216971_s_at	1.01414	1.11428	1.22288	1.65103	HD1; PCN; EBS1; EBSO; PLTN; PLEC1b	Z54367	plectin 1, intermediate filament binding protein 500kDa
217127_at	1.09126	1.03014	1.35174	1.58241	CTH	AL354872
216205_s_at	0.978324	1.37835	2.00087	1.30884	HSG; MARF; CMT2A; CPRP1; CMT2A2; KIAA0214	AK021947	mitofusin 2
216247_at	1.30177	1.75322	1.79529	1.4285	RPS20	AF113008	Homo sapiens clone FLB0708 mRNA sequence.
216250_s_at	1.10713	1.3086	1.54248	1.83612	LPXN	X77598	H.sapiens LAM A3 mRNA for laminin alpha 3 chain.
216210_x_at	0.944088	1.009	1.24905	1.4916	TRIOBP	AA046650	TRIO and F-actin binding protein
216048_s_at	0.647796	1.0045	0.641158	1.38927	KIAA0878	AK023621	Rho-related BTB domain containing 3
216060_s_at	0.916275	0.8202	0.604311	1.12674	FLJ41657; KIAA0666	AK021890	dishevelled associated activator of morphogenesis 1
216438_s_at	1.03355	1.23779	1.49258	1.71763	TMSB4X	AL133228
216315_x_at	0.929083	0.573161	0.709917	0.74895	UBE2V1	AL121873
216274_s_at	1.14284	1.34221	1.64251	1.67091	SEC11A	N99438	SEC11 homolog A (S. cerevisiae)
216392_s_at	1.15366	1.21235	1.46699	1.26694	P125; MSTP053	AK021846	SEC23 interacting protein
208860_s_at	0.794909	0.801522	0.439548	1.17878	SHS; XH2; XNP; ATR2; SFM1; MRXS3; RAD54; MRXHF1; RAD54L; ZNF-HX; MGC2094	U09820	alpha thalassemia/mental retardation syndrome X-linked (RAD54 homolog, S. cerevisiae)
208861_s_at	0.759299	0.555022	0.324189	0.672995	SHS; XH2; XNP; ATR2; SFM1; MRXS3; RAD54; MRXHF1; RAD54L; ZNF-HX; MGC2094	U72937	alpha thalassemia/mental retardation syndrome X-linked (RAD54 homolog, S. cerevisiae)
208868_s_at	1.04808	1.3509	1.64108	1.69436	GABARAPL1	BF125756	GABA(A) receptor-associated protein like 1
208776_at	1.13126	1.5117	1.33269	1.29165	PSMD11	BF432873	Transcribed locus
208771_s_at	1.04346	1.2715	1.64181	1.64324	LTA4H	J02959	leukotriene A4 hydrolase
208942_s_at	1.00903	0.844406	0.442334	0.695804	TLOC1	BE866511	Translocation protein 1
208950_s_at	1.02903	1.22835	1.55236	1.53772	EPD; PDE; ATQ1	BC002515	aldehyde dehydrogenase 7 family, member A1
208951_at	0.994266	1.3263	1.72344	1.76481	EPD; PDE; ATQ1	BC002515	aldehyde dehydrogenase 7 family, member A1
208971_at	1.11615	1.19947	1.61069	1.52481	PCT	M14016	uroporphyrinogen decarboxylase
208890_s_at	0.962206	1.01858	1.54329	1.32561	MM1; PLEXB2; KIAA0315; Nbla00445; dJ402G11.3	BC004542	plexin B2
208891_at	1.11501	1.19107	1.31225	1.70604	MKP3; PYST1	BC003143	dual specificity phosphatase 6
208892_s_at	1.02919	1.12249	1.10351	1.67867	MKP3; PYST1	BC003143	dual specificity phosphatase 6
208893_s_at	1.09432	1.23528	1.34286	1.90868	MKP3; PYST1	BC005047	dual specificity phosphatase 6
208925_at	1.23843	1.31994	1.30138	1.51266	C3orf4; MGC3316; MGC9861; GENX-3745; MGC111162	AF161522	claudin domain containing 1
208621_s_at	0.957457	1.04068	1.33525	1.12466	VIL2	BF663141	Villin 2 (ezrin)
208631_s_at	1.02195	1.217	1.83455	1.54194	GBP; HADH; MTPA; LCHAD; MGC1728; TP-ALPHA	U04627	hydroxyacyl-Coenzyme A dehydrogenase/3-ketoacyl-Coenzyme A thiolase/enoyl-Coenzyme A hydratase (trifunctional protein), alpha subunit
208433_s_at	1.18109	1.222	1.55827	1.43046	APOER2; HSZ75190	NM_017522	low density lipoprotein receptor-related protein 8, apolipoprotein e receptor
208368_s_at	0.716437	0.726832	0.387191	0.657727	FAD; FACD; FAD1; BRCC2; FANCB; FANCD; FANCD1	NM_000059	breast cancer 2, early onset
208511_at	0.935934	0.852805	0.675072	0.56786	PTTG2	NM_021000	pituitary tumor-transforming 3
208453_s_at	0.994839	1.13909	1.43851	1.33914	XPNPEP1	NM_006523	X-prolyl aminopeptidase (aminopeptidase P) 1, soluble; synonyms: SAMP, XPNPEP, XPNPEPL, XPNPEPL1; X-prolyl aminopeptidase (aminopeptidase P)-like; X-prolyl aminopeptidase (aminopeptidase P) 1, soluble (SAMP, XPNPEP, XPNPEPL); Homo sapiens X-prolyl aminopeptidase (aminopeptidase P) 1, soluble (XPNPEP1), mRNA.
208459_s_at	1.02686	1.04961	1.72868	1.29992	RANBP16; KIAA0745	NM_015024	exportin 7
208721_s_at	1.09312	1.2435	1.4839	1.32879	ANAPC5	BF967271	Anaphase promoting complex subunit 5
208717_at	1.12127	1.24163	1.52943	1.47174	MGC133129	BC001669	oxidase (cytochrome c) assembly 1-like
208729_x_at	1.11523	1.23462	1.55412	1.40092	HLA B; SPDA1; HLA-B-5501	D83043	major histocompatibility complex, class I, B
208661_s_at	1.18168	1.23839	0.990109	1.56382	TTC3	AW510696	Tetratricopeptide repeat domain 3
208650_s_at	0.778904	0.990496	1.08568	1.51759	CD24	BG327863	CD24 molecule
208478_s_at	1.04447	1.16528	1.85236	1.46477	Bax zeta	NM_004324	BCL2-associated X protein
208699_x_at	1.1675	1.22117	1.56087	1.46663	TKT	BF696840	Transketolase (Wernicke-Korsakoff syndrome)
208682_s_at	1.00338	1.19152	1.56436	1.32716	11B6; BCG1; HCA10; JCL-1; MAGED; MAGE-D2; MGC8386	AF126181	melanoma antigen family D, 2
209312_x_at	1.01643	0.950615	1.37485	1.81407	DRB1; HLA DRB1; HLA-DR1B; HLA-DRB1*	U65585	major histocompatibility complex, class II, DR beta 1
209345_s_at	1.03451	1.29441	1.57822	1.48361	PI4KII	AL561930	Phosphatidylinositol 4-kinase type II
209333_at	1.13183	1.16823	1.75861	1.63503	ATG1; UNC51; Unc51.1; FLJ38455	AB018265	unc-51-like kinase 1 (C. elegans)
209341_s_at	1.0935	1.38842	1.73638	1.24606	IKBKB	AU153366	Inhibitor of kappa light polypeptide gene enhancer in B-cells, kinase beta
209255_at	1.0794	1.2783	1.6042	1.52021	KIAA0265	D87454	KIAA0265 protein
209259_s_at	0.918535	0.769482	0.475679	0.695839	BAM; BMH; HCAP; CDLS3; CSPG6; SMC3L1	AF020043	structural maintenance of chromosomes 3
209448_at	0.952513	0.855192	0.779069	0.645713	CC3; TIP30; FLJ26963	BC002439	HIV-1 Tat interactive protein 2, 30kDa
209456_s_at	0.99374	1.16577	1.41287	1.22275	Hos; BTRC2; FBW1B; Fbw11; BTRCP2; FBXW1B; KIAA0696	AB033281	F-box and WD repeat domain containing 11
209470_s_at	1.06857	1.10587	1.40259	1.88665	M6A; GPM6	D49958	glycoprotein M6A
209375_at	1.15314	1.42473	1.63543	1.68468	XP3; XPCC	D21089	xeroderma pigmentosum, complementation group C
209471_s_at	1.12217	1.41344	1.55361	1.56834	FPTA; PGGT1A; MGC99680	L00634	farnesyltransferase, CAAX box, alpha
209398_at	1.37432	1.26309	1.52609	1.15033	H1.2; H1F2; MGC3992	BC002649	histone cluster 1, H1c
209376_x_at	0.952415	0.883816	0.625574	0.984826	SFRS2IP	AW084759	Splicing factor, arginine/serine-rich 2, interacting protein
209394_at	1.18992	1.0904	1.40828	1.55261	ASTML; ASMTLX; ASMTLY	BC002508	acetylserotonin O-methyltransferase-like
209050_s_at	1.06871	1.2733	1.27982	1.41048	RALGDS	AI421559	Ral guanine nucleotide dissociation stimulator
209006_s_at	1.10255	1.52753	1.35815	1.5393	NPD014; DJ465N24.2.1; RP3-465N24.4	AF247168	chromosome 1 open reading frame 63
208992_s_at	0.931515	1.12436	1.25204	1.76094	APRF; FLJ20882; MGC16063	BC000627	signal transducer and activator of transcription 3 (acute-phase response factor)
208994_s_at	0.987789	0.915134	0.630601	0.88138	PPIG	AI638762	Peptidylprolyl isomerase G (cyclophilin G)
209019_s_at	1.07862	1.26481	1.38999	1.50403	BRPK; PARK6; FLJ27236	AF316873	PTEN induced putative kinase 1
209022_at	0.996463	0.875225	0.620612	0.819503	SA2; SA-2; FLJ25871; bA517O1.1; DKFZp686P168; DKFZp781H1753	AK026678	stromal antigen 2
209217_s_at	0.999821	1.09345	1.67564	1.32766	JM5; WDRX1; WIPI4; WIPI-4	BC000464	WD repeat domain 45
209231_s_at	1.01476	0.988007	1.34149	1.0252	DCTN5	AI038068	Dynactin 5 (p25)
209209_s_at	1.18186	1.35231	1.58029	1.73717	PLEKHC1	AW469573	Pleckstrin homology domain containing, family C (with FERM domain) member 1
209118_s_at	1.10272	1.50369	2.31039	2.80963	TUBA3; FLJ25113; B-ALPHA-1	AF141347	tubulin, alpha 1a
209160_at	1.49193	1.78452	1.97591	3.07052	DD3; HAKRB; HAKRe; HA1753; HSD17B5; hluPGFS; KIAA0119	AB018580	aldo-keto reductase family 1, member C3 (3-alpha hydroxysteroid dehydrogenase, type II)
209136_s_at	1.18374	1.2404	1.41884	1.45757	USP10	BG390445	Ubiquitin specific peptidase 10
206829_x_at	0.889669	0.957044	0.590869	0.940061	FLJ13659; MGC133232; DKFZp762K012	NM_025189	zinc finger protein 430
206756_at	1.09257	1.0077	1.52347	1.50616	C6ST-2	NM_019886	carbohydrate (N-acetylglucosamine 6-O) sulfotransferase 7
206788_s_at	1.07456	1.1125	1.43626	1.45109	PEBP2B	AF294326	core-binding factor, beta subunit
206782_s_at	1.07926	1.36401	1.52904	1.18505	HSPF2; MCG18; DANJC4; MGC19482; MGC57189; MGC71863	NM_005528	DnaJ (Hsp40) homolog, subfamily C, member 4
206567_s_at	1.02702	1.09444	1.50756	0.961708	NZF; TZP; GLEA2; HCA58; FLJ33479; C20orf104	NM_016436	PHD finger protein 20
206587_at	1.09703	1.15521	1.26066	1.44585	Cctz2; CCTZ-2; TSA303; CCT-zeta-2; TCP-1-zeta-2	NM_006584	chaperonin containing TCP1, subunit 6B (zeta 2)
206595_at	1.34848	1.57792	1.76605	1.41356	CST6	NM_001323	cystatin E/M
206653_at	1.02078	0.972233	0.654533	0.847307	POLR3G	BF062139	Polymerase (RNA) III (DNA directed) polypeptide G (32kD)
206662_at	1.20941	1.48865	1.32807	2.0247	GRX; GRX1; MGC117407	NM_002064	glutaredoxin (thioltransferase)
206667_s_at	1.18539	1.62918	1.30959	1.76678	SCAMP; SCAMP37	AF005037	secretory carrier membrane protein 1
206600_s_at	1.20707	1.24629	1.6682	1.75372	MCT5; MCT6	NM_004695	solute carrier family 16, member 5 (monocarboxylic acid transporter 6)
206632_s_at	1.22047	1.1866	1.33506	1.61311	ARP4; ARCD3; PHRBNL; APOBEC1L; FLJ21201; bK150C2.2; DJ742C19.2	NM_004900	apolipoprotein B mRNA editing enzyme, catalytic polypeptide-like 3B
207057_at	0.940874	0.794074	0.411598	1.02895	MCT2	NM_004731	solute carrier family 16, member 7 (monocarboxylic acid transporter 2)
207124_s_at	1.19055	1.32747	1.38275	1.71866	GB5; FLJ37457; FLJ43714	NM_006578	guanine nucleotide binding protein (G protein), beta 5
207144_s_at	1.21206	1.3202	1.52853	1.45182	MSG1	NM_004143	Cbp/p300-interacting transactivator, with Glu/Asp-rich carboxy-terminal domain, 1
207108_s_at	0.970739	0.956094	0.516368	0.799664	CDLS; IDN3; CDLS1; IDN3-B; FLJ11203; FLJ12597; FLJ13354; FLJ13648; FLJ44854; DKFZp434L1319	NM_015384	Nipped-B homolog (Drosophila)
206875_s_at	0.971423	0.873619	0.558702	0.95764	STK2; se20-9; KIAA0204; MGC133067; bA16H23.1	NM_014720	STE20-like kinase (yeast)
206864_s_at	1.10791	1.33552	1.62817	1.5178	DP5; HARAKIRI	NM_003806	harakiri, BCL2 interacting protein (contains only BH3 domain)
206959_s_at	1.04646	1.16759	1.52317	1.36263	UPF3; HUPF3A; RENT3A	NM_023011	UPF3 regulator of nonsense transcripts homolog A (yeast)
206989_s_at	1.02824	0.901648	0.544057	0.888455	SIP1; CASP11; SRRP129	NM_004719	splicing factor, arginine/serine-rich 2, interacting protein
206153_at	0.806482	0.53601	0.555974	0.826754	CYP4F11	NM_021187	cytochrome P450, family 4, subfamily F, polypeptide 11
206155_at	1.04204	1.19478	1.55589	1.58893	DJS; MRP2; cMRP; ABC30; CMOAT; KIAA1010	NM_000392	ATP-binding cassette, sub-family C (CFTR/MRP), member 2
206104_at	1.11647	1.0703	1.6736	1.53947	Isl-1	NM_002202	ISL1 transcription factor, LIM/homeodomain, (islet-1)
206213_at	1.08989	0.934567	0.972762	0.580228	WNT-12	NM_003394	wingless-type MMTV integration site family, member 10B
206205_at	0.93932	0.896068	0.643874	0.797983	MPP9; MPP-9; FLJ12954; DKFZp434J034	NM_022782	M-phase phosphoprotein 9
206194_at	1.05284	0.887818	0.917758	0.622136	HOXC4	AW299598	Homeobox C4
206032_at	0.943187	1.1668	1.221	1.12026	DSC3	AI797281	Desmocollin 3
206043_s_at	1.0229	1.18975	1.44945	1.83777	SPCA2; KIAA0703; DKFZp686H22230	NM_014861	ATPase, Ca++ transporting, type 2C, member 2
206003_at	0.916409	0.8195	0.485239	0.68088	KIAA0635	NM_014645
206076_at	1.02747	0.99062	1.45863	1.16145	LRPB7	NM_006992	leucine rich repeat containing 23
206088_at	0.921934	1.50816	1.19711	1.14394	KIAA0563; DKFZp686N1231	NM_014834	leucine rich repeat containing 37A
206061_s_at	0.927764	0.972736	0.582561	0.846555	Dicer; HERNA; KIAA0928	NM_030621	Dicer1, Dcr-1 homolog (Drosophila)
206463_s_at	1.37965	1.23287	1.35479	0.880256	HEP27	NM_005794	dehydrogenase/reductase (SDR family) member 2
206414_s_at	1.09205	1.03449	1.2729	1.5178	PAP; PAG3; AMAP2; SHAG1; FLJ42910; KIAA0400; Pap-alpha	NM_003887	development and differentiation enhancing factor 2
206507_at	1.05595	0.609529	0.497058	0.515062	ZNF305	NM_014724	synonyms: ZFP96, ZNF29K1, KIAA0426, dJ29K1.2; go_component: nucleus [goid 0005634] [evidence IEA]; go_function: transcription factor activity [goid 0003700] [evidence IEA]; go_process: regulation of transcription, DNA-dependent [goid 0006355] [evidence IEA]; Homo sapiens zinc finger protein 305 (ZNF305), mRNA.
206295_at	1.1024	1.2792	1.37556	1.67369	IGIF; IL-18; IL-1g; IL1F4; MGC12320	NM_001562	interleukin 18 (interferon-gamma-inducing factor)
206308_at	0.852907	0.632798	0.694323	0.686835	DNMT2; PuMet; RNMT1; M.HsaIIP	AJ223333	tRNA aspartic acid methyltransferase 1
206315_at	1.13536	1.35657	1.67905	2.27559	CLF; NR6; CISS; CISS1; CLF-1	NM_004750	cytokine receptor-like factor 1
206385_s_at	0.971401	0.940908	1.19765	1.57141	FLJ45464; ANKYRIN-G	NM_020987	ankyrin 3, node of Ranvier (ankyrin G)
206355_at	0.89156	0.976385	0.958339	1.51847	GNAL	R20102	Guanine nucleotide binding protein (G protein), alpha activating activity polypeptide, olfactory type
207983_s_at	0.933527	0.780704	0.595939	0.91376	SA2; SA-2; FLJ25871; bA517O1.1; DKFZp686P168; DKFZp781H1753	NM_006603	stromal antigen 2
207986_x_at	1.01867	1.234	1.4916	1.39728	FRRS2	NM_001915	cytochrome b-561
207949_s_at	1.02319	1.09183	1.26517	1.55427	ICA69; ICAp69	NM_004968	islet cell autoantigen 1, 69kDa
207788_s_at	1.00514	1.26935	1.48214	1.23973	SCAM1; SH3D4; SCAM-1; vinexin	NM_005775	sorbin and SH3 domain containing 3
207808_s_at	1.15699	1.3025	1.55592	1.63489	PSA; PROS; PS21; PS22; PS23; PS24; PS25; PS 26; Protein S; protein Sa	NM_000313	protein S (alpha)
207761_s_at	1.19715	1.26734	1.61128	1.99381	AAM-B; DKFZP586A0522	NM_014033	methyltransferase like 7A
207826_s_at	1.3545	1.70615	2.33883	2.65844	HEIR-1	NM_002167	inhibitor of DNA binding 3, dominant negative helix-loop-helix protein
208229_at	1.05767	1.00047	1.5611	0.94622	FGFR2	NM_022975	fibroblast growth factor receptor 2 (bacteria-expressed kinase, keratinocyte growth factor receptor, craniofacial dysostosis 1, Crouzon syndrome, Pfeiffer syndrome, Jackson-Weiss syndrome)
208358_s_at	0.985566	1.43895	1.53917	1.53572	CGT	NM_003360	UDP glycosyltransferase 8 (UDP-galactose ceramide galactosyltransferase)
208309_s_at	1.17771	1.14741	1.52879	1.58237	MLT; MLT1; DKFZp434L132	NM_006785	mucosa associated lymphoid tissue lymphoma translocation gene 1
208070_s_at	0.910266	0.969204	0.620769	0.975158	POLZ; REV3	NM_002912	REV3-like, catalytic subunit of DNA polymerase zeta (yeast)
207463_x_at	1.20601	1.30148	1.59366	1.43386	MTG; TRY3; TRY4; PRSS4	NM_002771	protease, serine, 3 (mesotrypsin)
207147_at	1.13376	1.04429	1.29366	1.68845	TES1; TES-1	NM_004405	distal-less homeobox 2
207275_s_at	1.04236	1.27189	1.52485	1.73071	ACS1; LACS; FACL1; FACL2; LACS1; LACS2	NM_001995	acyl-CoA synthetase long-chain family member 1
207233_s_at	1.18466	1.5611	1.6628	1.15405	WS2A	NM_000248	microphthalmia-associated transcription factor
207265_s_at	0.92086	1.03652	1.28874	1.50236	ERD2L3	NM_016657	KDEL (Lys-Asp-Glu-Leu) endoplasmic reticulum protein retention receptor 3
207263_x_at	0.967822	1.54557	1.27801	1.35	VEZATIN; DKFZp761C241	NM_017599	vezatin, adherens junctions transmembrane protein
207564_x_at	1.06633	1.41143	1.57627	1.40699	OGT	NM_003605	O-linked N-acetylglucosamine (GlcNAc) transferase (UDP-N-acetylglucosamine:polypeptide-N-acetylglucosaminyl transferase)
211729_x_at	1.08524	1.10039	1.57862	1.58334	BLVR; BVRA	BC005902	biliverdin reductase A
211749_s_at	0.908125	1.06009	1.3746	1.27102	CEB	BC005941	vesicle-associated membrane protein 3 (cellubrevin)
211717_at	1.03331	0.885831	0.66964	0.57277	MGC15396; DKFZp451K241	BC005853	ankyrin repeat domain 40
211804_s_at	0.981657	1.2443	1.58641	1.30556	p33(CDK2)	AB012305	cyclin-dependent kinase 2
211692_s_at	1.02891	1.21292	1.53632	1.2777	JFY1; PUMA; PUMA/JFY1	AF332558	BCL2 binding component 3
211858_x_at	0.988735	1.1549	1.3176	1.56226	AHO; GSA; GSP; POH; GPSA; GNAS1; PHP1A; PHP1B; C20orf45; MGC33735; dJ309F20.1.1; dJ806M20.3.3	AF088184	GNAS complex locus
211905_s_at	0.84006	1.24286	1.36693	1.6904	CD104	AF011375	integrin, beta 4
211812_s_at	0.696334	0.440481	0.618992	0.614576	P; P1; GLOB; GLCT3; galT3; Gb4Cer; B3GALT3; beta3Gal-T3	AB050856	beta-1,3-N-acetylgalactosaminyltransferase 1 (globoside blood group)
211833_s_at	1.04104	1.43772	1.91858	1.60764	Bax zeta	U19599	BCL2-associated X protein
211934_x_at	1.04491	1.33812	1.67311	1.38632	GANAB	W87689	Glucosidase, alpha; neutral AB
211993_at	0.923266	0.981268	1.45442	1.16212	WNK1	AI768512	WNK lysine deficient protein kinase 1
211913_s_at	1.09102	1.35263	1.6587	1.5681		L08961	Homo sapiens transmembrane tyrosine kinase mRNA, complete cds.
211924_s_at	0.966637	1.06039	1.05761	1.50041	CD87; UPAR; URKR	AY029180	plasminogen activator, urokinase receptor
211257_x_at	0.84268	0.788782	0.606677	0.68345	ZFML; NP220; Zfp638; MGC26130; MGC90196; DKFZp686P1231	AF273049	zinc finger protein 638
211202_s_at	1.06195	1.18097	1.31033	1.47959	PUT1; PLU-1; FLJ10538; FLJ12459; FLJ12491; FLJ16281; FLJ23670; RBBP2H1A	AF087481	jumonji, AT rich interactive domain 1B
211299_s_at	0.98978	1.18057	1.55036	1.1887	ESA; ECS1; ESA1; ECS-1; M17S1	BC003683	flotillin 2
211065_x_at	0.999493	1.17961	1.56339	1.44597	PFK-B; FLJ30173; FLJ40909; DKFZp686G1648; DKFZp686L2097	BC006422	phosphofructokinase, liver
211160_x_at	1.01142	1.21388	1.30765	1.64566	FLJ40884	M95178	actinin, alpha 1
211098_x_at	1.15425	1.08794	1.57914	1.42666	PCIA3; TMCC4; HP10122; PNAS-136; RP11-466F5.7	AF277194	transmembrane and coiled-coil domains 1
211126_s_at	1.06774	1.29437	1.57197	1.71599	CRP2; LMO5; SmLIM	U46006	cysteine and glycine-rich protein 2
211504_x_at	0.865812	0.91605	0.619564	0.74788	KIAA0619	D87931	Rho-associated, coiled-coil containing protein kinase 2
211528_x_at	1.06444	1.10844	1.49457	1.40889	MHC-G	M90685	HLA-G histocompatibility antigen, class I, G
211458_s_at	0.986313	1.20895	1.74594	1.59407	GABARAPL3	AF180519	GABA(A) receptors associated protein like 3
211470_s_at	0.99592	1.43606	1.48076	1.37553	ST1C1; ST1C2; SULT1C1; SULT1C#1; humSULTC2	AF186255	sulfotransferase family, cytosolic, 1C, member 2
211561_x_at	1.02998	1.19711	1.60173	1.65444	MAPK14	L35253	Human p38 mitogen activated protein (MAP) kinase mRNA, complete cds.
211569_s_at	1.03861	1.23089	1.65646	1.47412	HAD; HHF4; HADH1; SCHAD; HADHSC; M/SCHAD; MGC8392	AF001903	hydroxyacyl-Coenzyme A dehydrogenase
211571_s_at	1.0356	1.46231	1.31345	2.23225	WGN; ERVR; PG-M; WGN1; CSPG2; DKFZp686K06110	D32039	versican
211574_s_at	1.04101	1.33907	1.44069	1.60277	MCP; TLX; MIC10; TRA2.10; MGC26544	D84105	CD46 molecule, complement regulatory protein
211352_s_at	1.20187	1.26551	1.31904	1.51516	CAGH16	U80737	similar to Hin-2 encoded by GenBank Accession Number U19179; polyglutamine rich; Homo sapiens CAGH16 mRNA, complete cds.
211421_s_at	1.02241	0.920585	1.27202	2.05927	RET	M31213	papillary thyroid carcinoma-encoded protein; Human papillary thyroid carcinoma-encoded protein mRNA, complete cds.
212314_at	1.05009	1.09256	1.42351	1.52191	KIAA0746; FLJ21629; FLJ41299; DKFZp781J1697	AB018289	KIAA0746 protein
212293_at	1.10039	1.23545	1.59019	1.43858	HIPK1	BG111260	Homeodomain interacting protein kinase 1
212254_s_at	0.927683	0.795313	0.5183	0.801973	DST	AI798790	Dystonin
212249_at	0.814098	1.00615	0.975656	1.42917	PIK3R1	AI934473	Phosphoinositide-3-kinase, regulatory subunit 1 (p85 alpha)
212282_at	1.00124	1.16765	1.53641	1.39348	TMEM97	BF038366	Transmembrane protein 97
212268_at	0.970538	1.27878	1.36298	1.55493	EI; LEI; PI2; MNEI; M/NEI; ELANH2	NM_030666	serpin peptidase inhibitor, clade B (ovalbumin), member 1
212435_at	0.930341	0.837179	0.60577	0.743558	TRIM33	AA205593	Tripartite motif-containing 33
212417_at	0.841657	0.850334	0.601119	0.80708	SCAMP1	BF058944	Secretory carrier membrane protein 1
212457_at	0.953724	0.757035	0.734671	0.647537	TFEA; RCCP2	AL161985	transcription factor binding to IGHM enhancer 3
212368_at	0.802091	0.783233	0.461991	0.869514	ZNF292	AA972711	Zinc finger protein 292
212379_at	0.982342	1.07705	1.29106	1.16811	GART	BE966876	Phosphoribosylglycinamide formyltransferase, phosphoribosylglycinamide synthetase, phosphoribosylaminoimidazole synthetase
212365_at	1.14714	1.28685	1.37966	1.54817	MYO1B	BF215996	Myosin IB
212366_at	0.753863	0.815829	0.396876	0.769106	ZNF292	BF223237	Zinc finger protein 292
212065_s_at	0.885054	0.717646	0.619871	0.801225	USP34	AW502434	Ubiquitin specific peptidase 34
212070_at	1.04398	1.40311	1.56844	1.62758	GPR56	AL554008	G protein-coupled receptor 56
212111_at	1.05343	1.38544	1.67033	1.75928	STX12	AA628051	Syntaxin 12
212027_at	0.91157	0.898358	0.649493	0.679673	RBM25	AI925305	wn02f07.x1 NCI_CGAP_Ut2 Homo sapiens cDNA clone IMAGE:2444293 3' similar to TR:Q16083 Q16083 U1 SMALL NUCLEAR RIBONUCLEOPROTEIN 1SNRP HOMOLOG ;contains element TAR1 repetitive element ;, mRNA sequence.
212013_at	0.940678	1.00725	0.88584	1.43025	PXN; MG50; PRG2; D2S448; D2S448E; KIAA0230	D86983	peroxidasin homolog (Drosophila)
212019_at	1.09049	1.42927	1.62624	1.56254	L12; CSIG; PBK1; MGC138433; MGC142259; DKFZP564M182	AK025446	ribosomal L1 domain containing 1
212058_at	1.00208	0.910754	0.639365	0.84624	SR140	AI184562	U2-associated SR140 protein
212203_x_at	1.18656	1.33318	1.73285	1.54442	IFITM3	BF338947	Interferon induced transmembrane protein 3 (1-8U)
212177_at	0.739137	0.891078	0.54886	0.723454	C6orf111	AW081113	Chromosome 6 open reading frame 111
212233_at	0.964877	0.958904	1.01574	1.49989	MAP1B	AL523076	3'UTR of hypothetical protein (ORF1)
212141_at	1.07633	1.23001	1.50612	1.31193	MCM4	AA604621	Minichromosome maintenance complex component 4
212162_at	1.02332	1.1742	1.18995	1.50741	KIDINS220; MGC163482	AK022873	kinase D-interacting substrate of 220 kDa
212173_at	1.04066	1.32282	1.542	1.22476	AK2	AU154985	Adenylate kinase 2
212146_at	1.13191	1.26063	1.30015	1.5245	SKIP; KIAA0842; RP11-169K16.1	AB020649	pleckstrin homology domain containing, family M (with RUN domain) member 2
209885_at	1.11164	1.2053	1.4782	1.49238	Rho; ARHD; RHOM; RHOHP1	BC001338	ras homolog gene family, member D
209890_at	0.706915	0.579642	0.754474	0.884319	NET-4; TM4SF9; TSPAN-5	AF065389	tetraspanin 5
209894_at	1.02411	0.888212	0.446995	0.73924	OBR; CD295	U50748	leptin receptor
209837_at	1.07718	1.17045	1.47879	1.13862	MU-4; MU-ARP2	AF155158	adaptor-related protein complex 4, mu 1 subunit
209838_at	1.02925	0.886252	0.5933	0.592161	COPS2	AA496247	COP9 constitutive photomorphogenic homolog subunit 2 (Arabidopsis)
209799_at	1.0288	1.31571	1.62621	1.46386	AMPK; AMPKa1; MGC33776; MGC57364	AF100763	protein kinase, AMP-activated, alpha 1 catalytic subunit
209865_at	0.954181	0.960548	0.552112	0.74734	DKFZp781P1297	BC005136	solute carrier family 35 (UDP-N-acetylglucosamine (UDP-GlcNAc) transporter), member A3
209846_s_at	1.18286	1.25349	1.39711	1.47304	BTF4; BT3.2; BT3.3	BC002832	butyrophilin, subfamily 3, member A2
210145_at	1.05264	1.23811	1.45902	1.52332	PLA2G4; MGC126350; cPLA2-alpha	M68874	phospholipase A2, group IVA (cytosolic, calcium-dependent)
210143_at	1.42803	1.59053	1.62758	1.65707	ANX14	AF196478	annexin A10
210138_at	1.05353	1.03918	1.23341	1.52357	RGSZ1; ZGAP1	AF074979	regulator of G-protein signalling 20
210135_s_at	1.07643	1.16394	1.48572	1.5746	OG12; SHOT; OG12X; OGI2X	AF022654	short stature homeobox 2
210018_x_at	1.16291	1.28554	1.82803	1.77773	MLT; MLT1; DKFZp434L132	AB026118	mucosa associated lymphoid tissue lymphoma translocation gene 1
209969_s_at	1.38525	1.38533	1.28553	1.4333	ISGF-3; STAT91; DKFZp686B04100	BC002704	signal transducer and activator of transcription 1, 91kDa
209980_s_at	1.05618	1.28889	1.70385	1.5905	SHMT1	L23928
210057_at	0.977326	0.896472	0.473895	0.879481	SMG1; ATX; LIP; 61E3.4; KIAA0421	U32581	PI-3-kinase-related kinase SMG-1
210026_s_at	1.0158	1.12707	1.48182	1.23923	BIMP1; CARMA3; MGC142219	AY028896	caspase recruitment domain family, member 10
209566_at	0.957539	1.15221	1.29028	1.50619	MGC26273	AL080184	insulin induced gene 2
209642_at	0.987858	0.653884	0.724777	0.775879	BUB1A; BUB1L; hBUB1	AF043294	BUB1 budding uninhibited by benzimidazoles 1 homolog (yeast)
209624_s_at	1.08668	1.31586	1.55564	1.21194	MCCB	AB050049	methylcrotonoyl-Coenzyme A carboxylase 2 (beta)
209504_s_at	0.960373	1.06455	1.39775	1.56149	KPL1; PHR1; PHRET1	AF081583	pleckstrin homology domain containing, family B (evectins) member 1
209539_at	1.07494	1.17047	1.02644	1.6933	PIXA; COOL2; MRX46; Cool-2; KIAA0006; alphaPIX; alpha-PIX	D25304	Rac/Cdc42 guanine nucleotide exchange factor (GEF) 6
209759_s_at	1.13781	1.15217	1.48864	1.23796	DCI	BC002746	dodecenoyl-Coenzyme A delta isomerase (3,2 trans-enoyl-Coenzyme A isomerase)
209771_x_at	0.642846	0.838923	1.02082	1.4832	CD24	AA761181	nz09g03.s1 NCI_CGAP_GCB1 Homo sapiens cDNA clone IMAGE:1287316 3' similar to gb:M57627 INTERLEUKIN-10 PRECURSOR (HUMAN);, mRNA sequence.
209644_x_at	1.09223	1.26116	1.60885	1.50821	ARF; MLM; p14; p16; p19; CMM2; INK4; MTS1; TP16; CDK4I; CDKN2; INK4a; p14ARF; p16INK4; p16INK4a	U38945	cyclin-dependent kinase inhibitor 2A (melanoma, p16, inhibits CDK4)
209645_s_at	1.06648	1.40294	1.47425	1.56435	ALDH5; ALDHX; MGC2230	NM_000692	aldehyde dehydrogenase 1 family, member B1
209703_x_at	1.08529	0.939898	1.56793	1.10794	AAM-B; DKFZP586A0522	BC004492	methyltransferase like 7A
210752_s_at	1.01324	1.27721	1.58909	1.0478	MAD7; MXD7; TCFL4	AF213666	MAX-like protein X
210658_s_at	1.02926	1.22999	1.48929	1.21956	VEAR; FLJ20966; KIAA1080	BC000284	golgi associated, gamma adaptin ear containing, ARF binding protein 2
210687_at	1.14849	1.12969	1.66672	1.38447	CPT1; CPT1-L; L-CPT1	BC000185	carnitine palmitoyltransferase 1A (liver)
210681_s_at	0.962522	0.941584	0.629984	0.717088	UNPH4; KIAA0529; MGC74854; MGC131982; MGC149838	AF153604	ubiquitin specific peptidase 15
210969_at	1.0493	1.56835	1.12352	1.15708	PAK2; PRK2; Pak-2; PRKCL2; PRO2042; MGC71074; MGC150606	AF118089	protein kinase N2
210904_s_at	1.11247	1.54756	1.48858	1.666	NR4; CD213A1; IL-13Ra	U81380	interleukin 13 receptor, alpha 1
210869_s_at	0.812879	0.747071	0.970161	1.37334	CD146; MUC18	M29277	melanoma cell adhesion molecule
210950_s_at	0.979771	1.22295	1.52179	1.47138	SS; SQS; DGPT; ERG9	BC003573	farnesyl-diphosphate farnesyltransferase 1
210962_s_at	0.628888	0.570967	0.356801	0.86654	PRKA9; CG-NAP; YOTIAO; AKAP350; AKAP450; HYPERION; KIAA0803; MU-RMS-40.16A	AB019691	A kinase (PRKA) anchor protein (yotiao) 9
210935_s_at	1.03827	1.26035	1.57733	1.40935	AIP1; NORI-1	AF274954	WD repeat domain 1
210260_s_at	1.03844	1.27417	1.29108	1.4804	GG2-1; SCC-S2; MDC-3.13	BC005352	tumor necrosis factor, alpha-induced protein 8
210273_at	0.918073	0.58818	0.387786	0.529996	BHPCDH; BH-Pcdh	AB006757	protocadherin 7
210276_s_at	1.09943	1.21796	1.40154	1.79891	TARA; DFNB28; FLJ39315; KIAA1662; dJ37E16.4; HRIHFB2122	AF281030	TRIO and F-actin binding protein
210247_at	1.063	1.48373	1.74974	1.7375	SYN2	AW139618	Synapsin II
210253_at	0.891524	0.820728	0.752526	0.448818	CC3; TIP30; FLJ26963	AF092095	HIV-1 Tat interactive protein 2, 30kDa
210544_s_at	1.13542	1.22711	1.53222	1.28455	SLS; FALDH; ALDH10; FLJ20851; DKFZp686E23276	BC002430	aldehyde dehydrogenase 3 family, member A2
210519_s_at	1.19454	1.44704	1.62971	1.55717	DTD; QR1; DHQU; DIA4; NMOR1; NMORI	BC000906	NAD(P)H dehydrogenase, quinone 1
210612_s_at	0.971609	1.18642	1.42787	1.84436	INPP5H; KIAA0348; MGC44422	AF318616	synaptojanin 2
210609_s_at	1.20124	1.70152	2.64356	2.35241	PIG3	BC000474	tumor protein p53 inducible protein 3
210425_x_at	0.994262	1.41553	1.44231	1.89585	GOLGA5	AF164622	67kDa Golgi protein; Homo sapiens golgin-67 (GOLGA5) mRNA, complete cds.
210457_x_at	0.795731	0.674847	0.743317	0.63844	HMG-R; HMGIY; MGC4242; MGC4854; MGC12816	AF176039	high mobility group AT-hook 1
210470_x_at	1.05591	1.21333	1.60017	1.34734	P54; NMT55; NRB54; P54NRB	BC003129	non-POU domain containing, octamer-binding
